# Supplementary material for: Effect of Age, Breed, and Sex on the Health-Related Quality of Life of Owner Assessed Healthy Dogs
Source: Front Vet Sci. 2021 Feb 5;8:603139. doi: 10.3389/fvets.2021.603139 (PMC7892584; doi:10.3389/fvets.2021.603139)
Supplement: Supplementary file 1 [file Data_Sheet_1.xlsx]

## Sheet: master 3411 dogs
QuestionnaireID	PetId	Date Completed	Age (months)	Age (weeks)	Age (days)	Age (years)	Age years by days/365	Age segment	Energetic/Enthusiastic	Happy/Content	Active/Comfortable	Calm/Relaxed	IsOldPet	In Perfect Health	BreedId	Breed	BreedOther	BreedGroupId	BreedGroupName	Gender	Date of Birth	DoBEstimated	Neutered		age in months	age segment
11422	5627	2018-03-25	37	160.714	1125	3	3.08219	young	3.51	6	5.62	3.84	FALSE	qol.transition_question.answer.yes	1	Other (Small)		1	Small	F	2015-02-24	FALSE	TRUE		1	young
11417	7332	2018-03-24	133	579.143	4054	11	11.1068	old	3.96	6	6	4.26	TRUE	Yes	177	Retriever - Labrador		3	Large	F	2007-02-16	FALSE	TRUE		2	young
11397	7320	2018-03-22	4	17.8571	125	0	0.342466	young	4.15	6	6	4.26	FALSE	qol.transition_question.answer.yes	303	West Highland White Terrier		1	Small	M	2017-11-17	FALSE	FALSE		3	young
11398	7321	2018-03-22	55	243	1701	4	4.66027	middle-aged	3.83	5.91	5.8	4.09	FALSE	qol.transition_question.answer.yes	163	Jack/Parson Russell Terrier		1	Small	F	2013-07-25	FALSE	TRUE		4	young
11399	2152	2018-03-22	43	187.143	1310	3	3.58904	young	3.79	5.73	5.65	3.97	FALSE	Yes	86	Chihuahua - Long Coat		1	Small	F	2014-08-20	FALSE	FALSE		5	young
11388	6961	2018-03-21	37	163.286	1143	3	3.13151	young	2.76	5.74	5.26	1.93	FALSE	Yes	177	Retriever - Labrador		3	Large	M	2015-02-02	FALSE	FALSE		6	young
11391	5807	2018-03-21	28	124.143	869	2	2.38082	young	3.72	5.82	5.9	3.72	FALSE	Yes	231	Pug		1	Small	M	2015-11-03	FALSE	FALSE		7	young
11375	7308	2018-03-20	12	52.4286	367	1	1.00548	young	3.79	5.63	5.74	3.74	FALSE	Yes	64	Boxer		3	Large	F	2017-03-18	FALSE	FALSE		8	young
11376	7309	2018-03-20	19	84.1429	589	1	1.6137	young	4.15	6	6	4.26	FALSE	Yes	303	West Highland White Terrier		1	Small	F	2016-08-08	FALSE	FALSE		9	young
11379	6262	2018-03-20	132	576.143	4033	11	11.0493	old	3.37	6	5.89	2.78	TRUE	Yes	177	Retriever - Labrador		3	Large	F	2007-03-05	FALSE	TRUE		10	young
11367	7301	2018-03-19	77	335	2345	6	6.42466	middle-aged	3.1	3.86	4.17	3.2	FALSE	Yes	98	Collie - Rough Coat		2	Medium	M	2011-10-17	FALSE	FALSE		11	young
11368	7302	2018-03-19	27	119.143	834	2	2.28493	young	4.15	5.72	5.47	3.22	FALSE	qol.transition_question.answer.yes	96	Spaniel - English Cocker		2	Medium	M	2015-12-06	FALSE	FALSE		12	young
11371	7303	2018-03-19	95	415.143	2906	7	7.96164	middle-aged	3.24	4.95	4.52	3.55	FALSE	Yes	59	Border Collie		2	Medium	F	2010-04-04	FALSE	FALSE		13	young
11373	6533	2018-03-19	9	42.2857	296	0	0.810959	young	4.15	5.9	6	4.26	FALSE	Yes	128	German Shepherd / Alsatian		3	Large	F	2017-05-27	FALSE	FALSE		14	young
11374	7307	2018-03-19	5	22.4286	157	0	0.430137	young	4.03	6	6	3.72	FALSE	Yes	4	Mixed (Small)		1	Small	M	2017-10-13	FALSE	FALSE		15	young
11363	7300	2018-03-18	73	321.286	2249	6	6.16164	middle-aged	3.93	6	5.91	2.35	FALSE	Yes	246	Rottweiler		3	Large	M	2012-01-20	FALSE	FALSE		16	young
11357	2207	2018-03-17	40	175	1225	3	3.35616	young	4.15	6	6	4.26	FALSE	Yes	74	Cairn Terrier		1	Small	F	2014-11-08	FALSE	FALSE		17	young
11359	7298	2018-03-17	6	27.2857	191	0	0.523288	young	4.07	6	6	4.26	FALSE	Yes	5	Mixed (Medium)		2	Medium	M	2017-09-07	FALSE	FALSE		18	young
11360	7299	2018-03-17	3	17	119	0	0.326027	young	3.98	6	6	4.01	FALSE	Yes	2	Other (Medium)		2	Medium	F	2017-11-18	FALSE	FALSE		19	young
11347	7290	2018-03-16	38	165	1155	3	3.16438	young	3.99	6	6	4.26	FALSE	Yes	162	Jack Chi (X Jack Russell/Chihuahua)		1	Small	M	2015-01-16	FALSE	FALSE		20	young
11349	2327	2018-03-16	39	173.143	1212	3	3.32055	young	4.15	6	6	4.26	FALSE	Yes	303	West Highland White Terrier		1	Small	F	2014-11-20	FALSE	FALSE		21	young
11343	6305	2018-03-15	34	150.429	1053	2	2.88493	young	3.24	5.59	6	2.4	FALSE	qol.transition_question.answer.yes	249	Saluki		3	Large	M	2015-04-27	FALSE	FALSE		22	young
11321	5690	2018-03-13	15	66.4286	465	1	1.27397	young	4.15	6	6	3.72	FALSE	Yes	70	Bull Terrier (Standard)		2	Medium	F	2016-12-03	FALSE	FALSE		23	young
11310	6755	2018-03-12	13	57	399	1	1.09315	young	3.34	5.4	5.9	4.26	FALSE	Yes	101	Cross Breed (Unknown X )/ Mongrel		4	Extra Large	M	2017-02-06	FALSE	TRUE		24	young
11314	7271	2018-03-12	80	351.857	2463	6	6.74795	middle-aged	3.57	6	5.56	2.81	FALSE	Yes	5	Mixed (Medium)		2	Medium	M	2011-06-14	FALSE	FALSE		25	young
11301	7269	2018-03-11	5	22.8571	160	0	0.438356	young	3.34	5.33	5.22	3.26	FALSE	qol.transition_question.answer.yes	6	Mixed (Large)		3	Large	M	2017-10-02	FALSE	FALSE		26	young
11302	5139	2018-03-11	60	261.429	1830	5	5.0137	middle-aged	3.59	6	5.81	3.55	FALSE	qol.transition_question.answer.yes	163	Jack/Parson Russell Terrier		1	Small	M	2013-03-07	FALSE	TRUE		27	young
11303	5749	2018-03-11	69	303	2121	5	5.81096	middle-aged	4.15	6	6	3.72	FALSE	Yes	59	Border Collie		2	Medium	M	2012-05-20	FALSE	FALSE		28	young
11304	4902	2018-03-11	64	281	1967	5	5.38904	middle-aged	4.07	5.9	6	2.9	FALSE	Yes	298	Weimaraner		3	Large	M	2012-10-21	FALSE	FALSE		29	young
11305	5726	2018-03-11	48	212	1484	4	4.06575	middle-aged	3.07	5.53	5.4	4.09	FALSE	Yes	96	Spaniel - English Cocker		2	Medium	F	2014-02-16	FALSE	FALSE		30	young
11308	6503	2018-03-11	16	72.1429	505	1	1.38356	young	3.67	6	6	2.85	FALSE	Yes	278	Spaniel - Welsh Springer		2	Medium	F	2016-10-22	FALSE	FALSE		31	young
11309	2679	2018-03-11	100	435.286	3047	8	8.34795	old	2.08	3.99	3.94	2.13	TRUE	Yes	284	Bull Terrier - Staffordshire		2	Medium	M	2009-11-06	FALSE	FALSE		32	young
11291	7265	2018-03-10	142	621	4347	11	11.9096	old	3.68	5.55	3.54	3.74	TRUE	Yes	132	German Pointer - Wirehaired		3	Large	M	2006-04-15	FALSE	FALSE		33	young
11293	1120	2018-03-10	61	268.714	1881	5	5.15342	middle-aged	4.15	6	6	4.26	FALSE	Yes	183	Lhasa Apso		1	Small	F	2013-01-14	FALSE	FALSE		34	young
11294	6921	2018-03-10	5	25.2857	177	0	0.484932	young	4	6	6	3.97	FALSE	qol.transition_question.answer.yes	95	Cockapoo / Cockerpoo / Spoodle (X Spaniel/Poodle)		2	Medium	F	2017-09-14	FALSE	FALSE		35	young
11296	6936	2018-03-10	47	206.571	1446	3	3.96164	young	3.39	5.08	5.88	3.43	FALSE	Yes	231	Pug		1	Small	M	2014-03-25	FALSE	TRUE		36	young
11297	7267	2018-03-10	70	305.429	2138	5	5.85753	middle-aged	2.08	3.99	3.94	2.13	FALSE	Yes	231	Pug		1	Small	M	2012-05-02	FALSE	TRUE		37	young
11282	5486	2018-03-09	143	621.714	4352	11	11.9233	old	3.58	5.54	5.04	3.72	TRUE	Yes	6	Mixed (Large)		3	Large	F	2006-04-09	FALSE	FALSE		38	young
11289	7264	2018-03-09	42	184.714	1293	3	3.54247	young	4.15	6	5.89	1.04	FALSE	Yes	101	Cross Breed (Unknown X )/ Mongrel		4	Extra Large	M	2014-08-24	FALSE	FALSE		39	young
11290	6777	2018-03-09	58	255.571	1789	4	4.90137	middle-aged	3.62	5.62	5.46	3.55	FALSE	Yes	284	Bull Terrier - Staffordshire		2	Medium	M	2013-04-15	FALSE	FALSE		40	young
11278	6549	2018-03-08	8	38.8571	272	0	0.745205	young	4.03	6	5.89	4.26	FALSE	Yes	124	Bulldog - French		1	Small	F	2017-06-09	FALSE	FALSE		41	young
11279	7263	2018-03-08	66	289.571	2027	5	5.55342	middle-aged	2.39	3.99	3.94	2.13	FALSE	Yes	7	Affenpinscher		1	Small	M	2012-08-19	FALSE	FALSE		42	young
11246	6326	2018-03-05	69	299.857	2099	5	5.75068	middle-aged	4.02	5.64	6	4.26	FALSE	Yes	181	Munsterlander (Large)		3	Large	M	2012-06-05	FALSE	FALSE		43	young
11240	6912	2018-03-04	5	25.2857	177	0	0.484932	young	4.15	6	6	4.26	FALSE	Yes	152	Hungarian Vizsla		3	Large	F	2017-09-08	FALSE	FALSE		44	young
11234	6491	2018-03-03	21	94	658	1	1.80274	young	4.09	6	6	3.97	FALSE	Yes	136	Retriever - Golden		3	Large	M	2016-05-14	FALSE	TRUE		45	young
11236	6883	2018-03-03	61	265.286	1857	5	5.08767	middle-aged	3.85	6	6	4.26	FALSE	Yes	284	Bull Terrier - Staffordshire		2	Medium	M	2013-01-31	FALSE	FALSE		46	young
11237	7248	2018-03-03	42	186.286	1304	3	3.5726	young	3.79	6	6	3.68	FALSE	Yes	5	Mixed (Medium)		2	Medium	F	2014-08-07	FALSE	FALSE		47	young
11239	7249	2018-03-03	18	80.4286	563	1	1.54247	young	4.01	5.9	6	3.97	FALSE	Yes	183	Lhasa Apso		1	Small	M	2016-08-17	FALSE	FALSE		48	middle-aged
11231	7244	2018-03-02	12	53.8571	377	1	1.03288	young	4.15	6	6	4.26	FALSE	Yes	96	Spaniel - English Cocker		2	Medium	M	2017-02-18	FALSE	FALSE		49	middle-aged
11219	6909	2018-03-01	57	251.857	1763	4	4.83014	middle-aged	3.25	6	5.8	4.26	FALSE	Yes	87	Chihuahua - Smooth Coat		1	Small	M	2013-05-03	FALSE	FALSE		50	middle-aged
11220	6910	2018-03-01	80	349.143	2444	6	6.69589	middle-aged	4.15	6	6	3.68	FALSE	Yes	163	Jack/Parson Russell Terrier		1	Small	M	2011-06-22	FALSE	TRUE		51	middle-aged
11206	6189	2018-02-28	12	55.7143	390	1	1.06849	young	4.15	6	6	4.26	FALSE	Yes	183	Lhasa Apso		1	Small	F	2017-02-03	FALSE	FALSE		52	middle-aged
11211	5748	2018-02-28	67	295	2065	5	5.65753	middle-aged	3.54	5.85	5.62	2.48	FALSE	Yes	163	Jack/Parson Russell Terrier		1	Small	M	2012-07-04	FALSE	TRUE		53	middle-aged
11213	7236	2018-02-28	27	117.857	825	2	2.26027	young	3.96	5.39	5.47	3.22	FALSE	Yes	231	Pug		1	Small	M	2015-11-26	FALSE	FALSE		54	middle-aged
11216	6520	2018-02-28	7	34.5714	242	0	0.663014	young	4.15	6	6	4.26	FALSE	Yes	183	Lhasa Apso		1	Small	F	2017-07-01	FALSE	FALSE		55	middle-aged
11201	4246	2018-02-27	30	131.571	921	2	2.52329	young	3.69	5.91	5.8	3.97	FALSE	Yes	199	Schnauzer (Miniature)		1	Small	F	2015-08-21	FALSE	FALSE		56	middle-aged
11188	7219	2018-02-26	9	39.5714	277	0	0.758904	young	3.63	5.01	5.37	0.87	FALSE	Yes	231	Pug		1	Small	M	2017-05-25	FALSE	FALSE		57	middle-aged
11190	6475	2018-02-26	44	193.143	1352	3	3.70411	young	2.33	4.54	5.61	3.84	FALSE	Yes	163	Jack/Parson Russell Terrier		1	Small	F	2014-06-15	FALSE	FALSE		58	middle-aged
11194	5409	2018-02-26	121	529.571	3707	10	10.1562	old	4.09	6	6	3.72	TRUE	Yes	101	Cross Breed (Unknown X )/ Mongrel		4	Extra Large	F	2008-01-03	FALSE	TRUE		59	middle-aged
11195	7224	2018-02-26	5	23.5714	165	0	0.452055	young	3.66	5.44	5.9	2.78	FALSE	Yes	124	Bulldog - French		1	Small	F	2017-09-14	FALSE	FALSE		60	middle-aged
11196	5622	2018-02-26	17	74.4286	521	1	1.4274	young	4.15	6	6	3.72	FALSE	Yes	95	Cockapoo / Cockerpoo / Spoodle (X Spaniel/Poodle)		2	Medium	M	2016-09-23	FALSE	FALSE		61	middle-aged
11198	2804	2018-02-26	68	298	2086	5	5.71507	middle-aged	2.59	5.81	5.9	3.72	FALSE	Yes	186	Lurcher		3	Large	M	2012-06-11	FALSE	FALSE		62	middle-aged
11181	5495	2018-02-25	110	478.857	3352	9	9.18356	old	3.06	5.36	5.02	3.55	TRUE	Yes	136	Retriever - Golden		3	Large	F	2008-12-22	FALSE	FALSE		63	middle-aged
11169	6775	2018-02-24	113	492.857	3450	9	9.45205	old	3.49	5.72	5.9	2.94	TRUE	Yes	38	Beagle		2	Medium	F	2008-09-14	FALSE	TRUE		64	middle-aged
11170	5290	2018-02-24	52	229.571	1607	4	4.40274	middle-aged	4.15	5.39	5.47	3.22	FALSE	Yes	177	Retriever - Labrador		3	Large	F	2013-10-01	FALSE	FALSE		65	middle-aged
11171	6833	2018-02-24	64	279.571	1957	5	5.36164	middle-aged	4.07	6	5.47	3.22	FALSE	qol.transition_question.answer.yes	177	Retriever - Labrador		3	Large	F	2012-10-16	FALSE	FALSE		66	middle-aged
11172	7212	2018-02-24	26	116.571	816	2	2.23562	young	4.09	4.54	5.36	4.26	FALSE	qol.transition_question.answer.yes	232	Puggle (X Pug/ Beagle)		1	Small	F	2015-12-01	FALSE	FALSE		67	middle-aged
11174	6174	2018-02-24	17	77.4286	542	1	1.48493	young	4.15	6	6	4.26	FALSE	Yes	176	Labradoodle (X Labrador/Poodle)		3	Large	M	2016-08-31	FALSE	FALSE		68	middle-aged
11175	6832	2018-02-24	30	132.429	927	2	2.53973	young	3.91	6	5.12	4.26	FALSE	Yes	303	West Highland White Terrier		1	Small	F	2015-08-12	FALSE	FALSE		69	middle-aged
11176	6025	2018-02-24	13	60.1429	421	1	1.15342	young	3.52	5.49	5.9	3.72	FALSE	Yes	183	Lhasa Apso		1	Small	F	2016-12-30	FALSE	FALSE		70	middle-aged
11178	6870	2018-02-24	8	35	245	0	0.671233	young	4.15	5.39	6	4.26	FALSE	Yes	2	Other (Medium)		2	Medium	M	2017-06-24	FALSE	FALSE		71	middle-aged
11180	7214	2018-02-24	111	483	3381	9	9.26301	old	3.45	5.22	4.98	3.2	TRUE	Yes	101	Cross Breed (Unknown X )/ Mongrel		4	Extra Large	M	2008-11-22	FALSE	FALSE		72	middle-aged
11152	7203	2018-02-22	8	36.5714	256	0	0.70137	young	2.33	4.5	3.39	2.13	FALSE	Yes	19	Bull Terrier - American Staffordshire		2	Medium	F	2017-06-11	FALSE	TRUE		73	middle-aged
11154	6848	2018-02-22	4	20.8571	146	0	0.4	young	4.09	6	6	4.26	FALSE	qol.transition_question.answer.yes	163	Jack/Parson Russell Terrier		1	Small	F	2017-09-29	FALSE	FALSE		74	middle-aged
11138	6842	2018-02-21	6	26.8571	188	0	0.515068	young	4.15	6	6	4.26	FALSE	Yes	177	Retriever - Labrador		3	Large	F	2017-08-17	FALSE	FALSE		75	middle-aged
11140	6303	2018-02-21	139	607.429	4252	11	11.6493	old	3.68	6	5.59	4.09	TRUE	Yes	152	Hungarian Vizsla		3	Large	F	2006-07-02	FALSE	TRUE		76	middle-aged
11141	6302	2018-02-21	14	62	434	1	1.18904	young	4.15	6	6	2.94	FALSE	Yes	152	Hungarian Vizsla		3	Large	F	2016-12-14	FALSE	FALSE		77	middle-aged
11143	7200	2018-02-21	6	29.5714	207	0	0.567123	young	3.84	5.49	5.9	3.72	FALSE	Yes	1	Other (Small)		1	Small	F	2017-07-29	FALSE	FALSE		78	middle-aged
11147	5385	2018-02-21	18	78.8571	552	1	1.51233	young	4.07	6	5.36	4.26	FALSE	Yes	226	Poodle (Toy)		1	Small	M	2016-08-18	FALSE	FALSE		79	middle-aged
11120	6778	2018-02-19	20	87.1429	610	1	1.67123	young	3.42	4.86	6	4.26	FALSE	qol.transition_question.answer.yes	284	Bull Terrier - Staffordshire		2	Medium	F	2016-06-19	FALSE	FALSE		80	middle-aged
11121	2432	2018-02-19	58	255.429	1788	4	4.89863	middle-aged	3.57	5.8	6	4.26	FALSE	Yes	42	Bedlington Terrier		2	Medium	F	2013-03-29	FALSE	FALSE		81	middle-aged
11122	3799	2018-02-19	36	156.857	1098	3	3.00822	young	3.73	5.32	5.35	4.26	FALSE	Yes	303	West Highland White Terrier		1	Small	F	2015-02-17	FALSE	FALSE		82	middle-aged
11117	3914	2018-02-18	52	227.571	1593	4	4.36438	middle-aged	4.15	6	6	4.26	FALSE	Yes	60	Border Terrier		1	Small	F	2013-10-09	FALSE	FALSE		83	middle-aged
11109	7187	2018-02-17	91	399.286	2795	7	7.65753	middle-aged	3.82	5.79	6	2.32	FALSE	Yes	103	Dachshund (Standard)		2	Medium	F	2010-06-24	FALSE	FALSE		84	middle-aged
11097	5699	2018-02-16	15	69.1429	484	1	1.32603	young	3.52	5.63	5.28	3.3	FALSE	Yes	274	Spaniel - English Springer		2	Medium	M	2016-10-20	FALSE	FALSE		85	middle-aged
11102	7183	2018-02-16	4	18.7143	131	0	0.358904	young	4.01	5.39	5.9	3.72	FALSE	Yes	120	Retriever - Flat-Coated		3	Large	F	2017-10-08	FALSE	FALSE		86	middle-aged
11103	7184	2018-02-16	17	75.8571	531	1	1.45479	young	3.17	4.77	4.01	2.91	FALSE	Yes	120	Retriever - Flat-Coated		3	Large	M	2016-09-03	FALSE	FALSE		87	middle-aged
11104	7185	2018-02-16	142	621	4347	11	11.9096	old	1.92	4.69	4.3	2.42	TRUE	Yes	136	Retriever - Golden		3	Large	F	2006-03-24	FALSE	TRUE		88	middle-aged
11080	5363	2018-02-15	15	68.2857	478	1	1.30959	young	4.15	6	6	4.26	FALSE	Yes	261	Shih Tzu		1	Small	F	2016-10-25	FALSE	FALSE		89	middle-aged
11083	3964	2018-02-15	206	898.143	6287	17	17.2247	old	3.54	6	5.8	3.97	TRUE	Yes	163	Jack/Parson Russell Terrier		1	Small	M	2000-11-29	FALSE	TRUE		90	middle-aged
11084	3955	2018-02-15	26	115.286	807	2	2.21096	young	4.15	6	6	4.26	FALSE	Yes	177	Retriever - Labrador		3	Large	F	2015-12-01	FALSE	FALSE		91	middle-aged
11085	4820	2018-02-15	37	161.857	1133	3	3.10411	young	3.58	6	6	3.39	FALSE	Yes	128	German Shepherd / Alsatian		3	Large	F	2015-01-09	FALSE	FALSE		92	middle-aged
11071	4668	2018-02-14	129	563.857	3947	10	10.8137	old	3.77	6	5.9	4.26	TRUE	Yes	4	Mixed (Small)		1	Small	F	2007-04-26	FALSE	TRUE		93	middle-aged
11072	1282	2018-02-14	48	212.571	1488	4	4.07671	middle-aged	3.78	6	5.67	3.8	FALSE	Yes	59	Border Collie		2	Medium	M	2014-01-18	FALSE	FALSE		94	middle-aged
11073	6787	2018-02-14	70	308.143	2157	5	5.90959	middle-aged	4.15	6	6	4.26	FALSE	Yes	226	Poodle (Toy)		1	Small	M	2012-03-20	FALSE	FALSE		95	middle-aged
11075	6788	2018-02-14	28	125.286	877	2	2.40274	young	4.15	6	6	4.26	FALSE	Yes	183	Lhasa Apso		1	Small	M	2015-09-21	FALSE	FALSE		96	old
11076	7170	2018-02-14	33	146	1022	2	2.8	young	4.15	5.39	5.36	2.94	FALSE	Yes	128	German Shepherd / Alsatian		3	Large	M	2015-04-29	FALSE	TRUE		97	old
11066	7164	2018-02-13	33	145.857	1021	2	2.79726	young	3.2	6	5.72	3.55	FALSE	Yes	101	Cross Breed (Unknown X )/ Mongrel		4	Extra Large	F	2015-04-29	FALSE	FALSE		98	old
11060	4649	2018-02-12	22	98.1429	687	1	1.88219	young	4.03	5.31	6	3.97	FALSE	Yes	261	Shih Tzu		1	Small	F	2016-03-27	FALSE	FALSE		99	old
11062	7158	2018-02-12	4	21.4286	150	0	0.410959	young	3.81	5.44	6	3.68	FALSE	Yes	128	German Shepherd / Alsatian		3	Large	M	2017-09-15	FALSE	FALSE		100	old
11055	5387	2018-02-11	21	94.1429	659	1	1.80548	young	4.01	6	6	3.97	FALSE	qol.transition_question.answer.yes	21	Anatolian Shepherd Dog		3	Large	F	2016-04-23	FALSE	FALSE		101	old
11058	4690	2018-02-11	38	167.571	1173	3	3.2137	young	4.03	5.23	5.9	3.72	FALSE	Yes	284	Bull Terrier - Staffordshire		2	Medium	M	2014-11-26	FALSE	FALSE		102	old
11050	7153	2018-02-10	4	20	140	0	0.383562	young	3.96	6	6	4.26	FALSE	Yes	137	Goldendoodle (X Golden Retriever/Poodle)		3	Large	F	2017-09-23	FALSE	FALSE		103	old
11036	6761	2018-02-08	22	98.1429	687	1	1.88219	young	2.71	4.47	4.53	1.88	FALSE	qol.transition_question.answer.yes	163	Jack/Parson Russell Terrier		1	Small	M	2016-03-23	FALSE	TRUE		104	old
11041	7152	2018-02-08	66	291.429	2040	5	5.58904	middle-aged	3.29	5.18	6	2.94	FALSE	Yes	252	Schnauzer (Standard)		2	Medium	F	2012-07-09	FALSE	FALSE		105	old
11024	7141	2018-02-07	5	23.8571	167	0	0.457534	young	4.09	6	6	2.9	FALSE	Yes	95	Cockapoo / Cockerpoo / Spoodle (X Spaniel/Poodle)		2	Medium	M	2017-08-24	FALSE	FALSE		106	old
11026	7143	2018-02-07	6	26.2857	184	0	0.50411	young	4.15	6	6	3.39	FALSE	Yes	128	German Shepherd / Alsatian		3	Large	F	2017-08-07	FALSE	FALSE		107	old
11027	7144	2018-02-07	23	103.286	723	1	1.98082	young	3.54	5.53	5.71	2.03	FALSE	Yes	231	Pug		1	Small	M	2016-02-15	FALSE	TRUE		108	old
11032	7146	2018-02-07	48	208.714	1461	4	4.00274	middle-aged	3.67	5.54	5.04	2.81	FALSE	Yes	5	Mixed (Medium)		2	Medium	M	2014-02-07	FALSE	FALSE		109	old
11018	7136	2018-02-06	22	96.1429	673	1	1.84384	young	3.72	5.5	5.2	1.2	FALSE	Yes	189	Maltese		1	Small	M	2016-04-04	FALSE	FALSE		110	old
11013	7133	2018-02-05	96	418.143	2927	8	8.01918	old	2.37	5.73	5.44	2.42	TRUE	qol.transition_question.answer.yes	202	Neopolitan Mastiff		3	Large	M	2010-01-31	FALSE	TRUE		111	old
11015	6168	2018-02-05	11	50.5714	354	0	0.969863	young	4.09	5.39	6	4.26	FALSE	Yes	95	Cockapoo / Cockerpoo / Spoodle (X Spaniel/Poodle)		2	Medium	F	2017-02-16	FALSE	FALSE		112	old
11004	7130	2018-02-04	40	178.286	1248	3	3.41918	young	3.64	5.91	6	2.52	FALSE	Yes	92	Chow Chow		3	Large	F	2014-09-05	FALSE	FALSE		113	old
11008	7131	2018-02-04	38	165.571	1159	3	3.17534	young	4.15	6	6	4.26	FALSE	Yes	274	Spaniel - English Springer		2	Medium	F	2014-12-03	FALSE	FALSE		114	old
11011	6416	2018-02-04	9	39.4286	276	0	0.756164	young	3.72	4.93	6	4.26	FALSE	Yes	274	Spaniel - English Springer		2	Medium	M	2017-05-04	FALSE	FALSE		115	old
11012	7132	2018-02-04	42	184.429	1291	3	3.53699	young	4.15	6	6	4.26	FALSE	Yes	102	Retriever - Curly Coated		3	Large	F	2014-07-24	FALSE	FALSE		116	old
10995	4784	2018-02-03	55	240.429	1683	4	4.61096	middle-aged	2.34	4.7	5.02	3.43	FALSE	Yes	274	Spaniel - English Springer		2	Medium	M	2013-06-26	FALSE	TRUE		117	old
10997	6458	2018-02-03	10	46.4286	325	0	0.890411	young	4.09	6	6	4.26	FALSE	Yes	303	West Highland White Terrier		1	Small	M	2017-03-15	FALSE	FALSE		118	old
11001	7129	2018-02-03	61	265.286	1857	5	5.08767	middle-aged	4.15	6	6	4.26	FALSE	Yes	5	Mixed (Medium)		2	Medium	F	2013-01-03	FALSE	FALSE		119	old
10991	7127	2018-02-02	74	326	2282	6	6.25205	middle-aged	4.03	6	6	3.1	FALSE	qol.transition_question.answer.yes	187	Mal-shi (X Maltese/Shih Tzu)		1	Small	F	2011-11-04	FALSE	FALSE		120	old
10993	2547	2018-02-02	92	400.571	2804	7	7.68219	middle-aged	3.98	6	5.62	3.97	FALSE	Yes	40	Bearded Collie		3	Large	M	2010-05-31	FALSE	FALSE		121	old
10974	6457	2018-01-31	51	223.857	1567	4	4.29315	middle-aged	4.07	6	6	4.26	FALSE	Yes	128	German Shepherd / Alsatian		3	Large	F	2013-10-17	FALSE	FALSE		122	old
10958	5456	2018-01-30	48	209.429	1466	4	4.01644	middle-aged	2.08	3.99	3.94	2.13	FALSE	Yes	136	Retriever - Golden		3	Large	M	2014-01-25	FALSE	FALSE		123	old
10964	7112	2018-01-30	10	44.5714	312	0	0.854795	young	4.15	6	6	4.26	FALSE	Yes	5	Mixed (Medium)		2	Medium	F	2017-03-24	FALSE	FALSE		124	old
10966	7113	2018-01-30	61	266	1862	5	5.10137	middle-aged	2.57	4.83	5.03	3.3	FALSE	Yes	309	Yorkshire Terrier		1	Small	M	2012-12-25	FALSE	TRUE		125	old
10967	7114	2018-01-30	53	234.857	1644	4	4.50411	middle-aged	4.01	5.91	5.9	2.9	FALSE	Yes	309	Yorkshire Terrier		1	Small	F	2013-07-31	FALSE	TRUE		126	old
10969	5542	2018-01-30	33	147.714	1034	2	2.83288	young	3.43	5.8	6	4.26	FALSE	Yes	60	Border Terrier		1	Small	M	2015-04-02	FALSE	FALSE		127	old
10947	6612	2018-01-29	15	68.5714	480	1	1.31507	young	4.15	6	6	4.26	FALSE	qol.transition_question.answer.yes	176	Labradoodle (X Labrador/Poodle)		3	Large	M	2016-10-06	FALSE	FALSE		128	old
10950	7099	2018-01-29	59	256.857	1798	4	4.92603	middle-aged	3.96	6	6	4.26	FALSE	Yes	177	Retriever - Labrador		3	Large	M	2013-02-26	FALSE	FALSE		129	old
10951	7100	2018-01-29	6	29.8571	209	0	0.572603	young	3.95	6	5.24	4.01	FALSE	Yes	128	German Shepherd / Alsatian		3	Large	M	2017-07-04	FALSE	FALSE		130	old
10952	7103	2018-01-29	80	349	2443	6	6.69315	middle-aged	3.83	6	6	4.26	FALSE	Yes	237	Rat Terrier		1	Small	M	2011-05-23	FALSE	FALSE		131	old
10953	3479	2018-01-29	110	479.571	3357	9	9.19726	old	3.3	4.54	4.68	4.26	TRUE	Yes	284	Bull Terrier - Staffordshire		2	Medium	M	2008-11-20	FALSE	FALSE		132	old
10940	5414	2018-01-28	19	82.8571	580	1	1.58904	young	4.15	6	6	4.26	FALSE	qol.transition_question.answer.yes	177	Retriever - Labrador		3	Large	F	2016-06-27	FALSE	FALSE		133	old
10929	7092	2018-01-25	56	247	1729	4	4.73699	middle-aged	3.55	5.34	5.79	4.26	FALSE	Yes	245	Rhodesian Ridgeback		3	Large	M	2013-05-02	FALSE	TRUE		134	old
10916	7082	2018-01-24	44	193	1351	3	3.70137	young	3.77	5.39	5.9	3.97	FALSE	Yes	284	Bull Terrier - Staffordshire		2	Medium	M	2014-05-14	FALSE	FALSE		135	old
10921	7088	2018-01-24	4	17.7143	124	0	0.339726	young	4.15	6	5.47	1.48	FALSE	Yes	59	Border Collie		2	Medium	F	2017-09-22	FALSE	FALSE		136	old
10925	7091	2018-01-24	46	203.571	1425	3	3.90411	young	3.66	5.9	5.76	2.9	FALSE	Yes	274	Spaniel - English Springer		2	Medium	F	2014-03-01	FALSE	FALSE		137	old
10914	6715	2018-01-23	5	23.5714	165	0	0.452055	young	4.15	6	6	4.26	FALSE	Yes	59	Border Collie		2	Medium	F	2017-08-11	FALSE	FALSE		138	old
10905	7075	2018-01-22	9	39.8571	279	0	0.764384	young	4.09	6	5.9	4.26	FALSE	Yes	231	Pug		1	Small	M	2017-04-18	FALSE	FALSE		139	old
10909	5944	2018-01-22	25	109.429	766	2	2.09863	young	3.27	5.54	5.81	3.55	FALSE	Yes	176	Labradoodle (X Labrador/Poodle)		3	Large	F	2015-12-18	FALSE	FALSE		140	old
10897	7073	2018-01-21	10	45.7143	320	0	0.876712	young	4.03	5.9	5.56	4.01	FALSE	Yes	274	Spaniel - English Springer		2	Medium	M	2017-03-07	FALSE	FALSE		141	old
10898	6509	2018-01-21	7	32.2857	226	0	0.619178	young	3.94	5.82	5.91	3.55	FALSE	Yes	177	Retriever - Labrador		3	Large	M	2017-06-09	FALSE	FALSE		142	old
10899	6694	2018-01-21	11	48.7143	341	0	0.934247	young	4.15	6	5.36	4.26	FALSE	Yes	284	Bull Terrier - Staffordshire		2	Medium	M	2017-02-14	FALSE	FALSE		143	old
10886	7072	2018-01-20	28	125.286	877	2	2.40274	young	4.15	5.34	6	3.43	FALSE	Yes	94	Spaniel - Clumber		2	Medium	M	2015-08-27	FALSE	FALSE		144	old
10895	2278	2018-01-20	48	209.857	1469	4	4.02466	middle-aged	4.01	6	6	4.26	FALSE	Yes	177	Retriever - Labrador		3	Large	M	2014-01-12	FALSE	FALSE		145	old
10879	3927	2018-01-19	51	223.714	1566	4	4.29041	middle-aged	3.96	6	6	4.26	FALSE	qol.transition_question.answer.yes	136	Retriever - Golden		3	Large	M	2013-10-06	FALSE	TRUE		146	old
10880	3343	2018-01-19	81	354.286	2480	6	6.79452	middle-aged	3.15	5.72	5.78	3.72	FALSE	Yes	60	Border Terrier		1	Small	F	2011-04-06	FALSE	FALSE		147	old
10882	6411	2018-01-19	54	236.571	1656	4	4.53699	middle-aged	4.07	6	6	3.72	FALSE	Yes	309	Yorkshire Terrier		1	Small	M	2013-07-08	FALSE	TRUE		148	old
10870	2729	2018-01-18	40	176.286	1234	3	3.38082	young	3.96	6	6	4.26	FALSE	Yes	136	Retriever - Golden		3	Large	M	2014-09-02	FALSE	TRUE		149	old
10873	4618	2018-01-18	69	301	2107	5	5.7726	middle-aged	3.85	5.9	5.8	3.55	FALSE	Yes	60	Border Terrier		1	Small	M	2012-04-12	FALSE	FALSE		150	old
10874	2873	2018-01-18	41	179	1253	3	3.43288	young	3.59	5.9	5.81	3.55	FALSE	Yes	5	Mixed (Medium)		2	Medium	F	2014-08-14	FALSE	FALSE		151	old
10876	2865	2018-01-18	31	136.714	957	2	2.62192	young	4.09	5.91	5.24	2.61	FALSE	Yes	6	Mixed (Large)		3	Large	M	2015-06-06	FALSE	FALSE		152	old
10877	7068	2018-01-18	102	445	3115	8	8.53425	old	3.12	5.82	5.8	3.97	TRUE	Yes	303	West Highland White Terrier		1	Small	F	2009-07-09	FALSE	FALSE		153	old
10855	4587	2018-01-17	22	96.7143	677	1	1.85479	young	2.08	3.99	3.94	2.13	FALSE	qol.transition_question.answer.yes	177	Retriever - Labrador		3	Large	F	2016-03-11	FALSE	FALSE		154	old
10851	7056	2018-01-16	21	93.5714	655	1	1.79452	young	3.9	6	5.47	2.93	FALSE	Yes	245	Rhodesian Ridgeback		3	Large	M	2016-04-01	FALSE	TRUE		155	old
10852	7057	2018-01-16	42	184.571	1292	3	3.53973	young	3.65	5.49	6	3.19	FALSE	Yes	245	Rhodesian Ridgeback		3	Large	F	2014-07-04	FALSE	TRUE		156	old
10842	7048	2018-01-15	9	42.4286	297	0	0.813699	young	4.15	6	6	4.26	FALSE	Yes	96	Spaniel - English Cocker		2	Medium	M	2017-03-24	FALSE	FALSE		157	old
10834	7044	2018-01-14	4	18.1429	127	0	0.347945	young	4.15	6	6	3.48	FALSE	Yes	59	Border Collie		2	Medium	F	2017-09-09	FALSE	FALSE		158	old
10840	6413	2018-01-14	11	51.5714	361	0	0.989041	young	3.64	5.59	6	3.19	FALSE	Yes	124	Bulldog - French		1	Small	M	2017-01-18	FALSE	FALSE		159	old
10826	7042	2018-01-13	9	39.8571	279	0	0.764384	young	3.77	6	5.9	3.14	FALSE	qol.transition_question.answer.yes	95	Cockapoo / Cockerpoo / Spoodle (X Spaniel/Poodle)		2	Medium	F	2017-04-09	FALSE	FALSE		160	old
10828	4651	2018-01-13	22	97.4286	682	1	1.86849	young	4.15	6	6	4.26	FALSE	Yes	278	Spaniel - Welsh Springer		2	Medium	M	2016-03-02	FALSE	FALSE		161	old
10829	4503	2018-01-13	57	248.571	1740	4	4.76712	middle-aged	4.15	6	6	4.26	FALSE	Yes	144	Greyhound		3	Large	F	2013-04-09	FALSE	TRUE		162	old
10830	6683	2018-01-13	11	49.7143	348	0	0.953425	young	3.7	5.29	5.8	3.43	FALSE	Yes	246	Rottweiler		3	Large	F	2017-01-30	FALSE	FALSE		163	old
10832	2985	2018-01-13	42	183.143	1282	3	3.51233	young	3.06	5.63	4.98	3.68	FALSE	Yes	96	Spaniel - English Cocker		2	Medium	F	2014-07-11	FALSE	FALSE		164	old
10833	2840	2018-01-13	50	218.714	1531	4	4.19452	middle-aged	3.78	6	5.37	2.68	FALSE	Yes	82	King Charles Spaniel - Cavalier		1	Small	F	2013-11-04	FALSE	FALSE		165	old
10812	7034	2018-01-11	19	85	595	1	1.63014	young	3.77	5.72	5.68	3.8	FALSE	Yes	59	Border Collie		2	Medium	M	2016-05-26	FALSE	TRUE		166	old
10813	7035	2018-01-11	26	114.857	804	2	2.20274	young	4.09	6	6	3.72	FALSE	qol.transition_question.answer.yes	6	Mixed (Large)		3	Large	F	2015-10-30	FALSE	FALSE		167	old
10804	7028	2018-01-10	31	136.571	956	2	2.61918	young	3.38	5.61	4.87	2.8	FALSE	Yes	189	Maltese		1	Small	F	2015-05-30	FALSE	FALSE		168	old
10808	7032	2018-01-10	11	48.5714	340	0	0.931507	young	3.37	4.98	5.65	1.96	FALSE	Yes	5	Mixed (Medium)		2	Medium	F	2017-02-04	FALSE	FALSE		169	old
10811	5550	2018-01-10	38	168.286	1178	3	3.2274	young	3.5	5.39	5.9	4.26	FALSE	Yes	107	Doberman Pinscher		2	Medium	F	2014-10-20	FALSE	FALSE		170	old
10791	7016	2018-01-09	10	46.5714	326	0	0.893151	young	4.15	6	6	3.72	FALSE	Yes	96	Spaniel - English Cocker		2	Medium	F	2017-02-17	FALSE	FALSE		171	old
10792	6611	2018-01-09	18	78.7143	551	1	1.50959	young	4.15	6	6	4.26	FALSE	Yes	95	Cockapoo / Cockerpoo / Spoodle (X Spaniel/Poodle)		2	Medium	M	2016-07-07	FALSE	TRUE		172	old
10793	5379	2018-01-09	43	188.571	1320	3	3.61644	young	4.09	5.21	6	3.39	FALSE	Yes	274	Spaniel - English Springer		2	Medium	M	2014-05-30	FALSE	FALSE		173	old
10794	5760	2018-01-09	50	219.143	1534	4	4.20274	middle-aged	4.15	5.44	5.85	3.97	FALSE	Yes	177	Retriever - Labrador		3	Large	M	2013-10-28	FALSE	FALSE		174	old
10796	7021	2018-01-09	3	17.1429	120	0	0.328767	young	4.15	6	6	3.97	FALSE	Yes	128	German Shepherd / Alsatian		3	Large	M	2017-09-11	FALSE	FALSE		175	old
10797	7022	2018-01-09	3	17.1429	120	0	0.328767	young	4.15	6	6	4.26	FALSE	qol.transition_question.answer.yes	128	German Shepherd / Alsatian		3	Large	F	2017-09-11	FALSE	FALSE		176	old
10798	4605	2018-01-09	92	401.143	2808	7	7.69315	middle-aged	3.79	5.63	6	4.26	FALSE	Yes	101	Cross Breed (Unknown X )/ Mongrel		4	Extra Large	M	2010-05-03	FALSE	FALSE		177	old
10799	7025	2018-01-09	14	63.8571	447	1	1.22466	young	3.95	5.7	5.81	3.55	FALSE	Yes	5	Mixed (Medium)		2	Medium	F	2016-10-19	FALSE	FALSE		178	old
10779	6355	2018-01-08	18	81.2857	569	1	1.5589	young	3.64	5.54	5.78	2.32	FALSE	Yes	163	Jack/Parson Russell Terrier		1	Small	M	2016-06-18	FALSE	FALSE		179	old
10780	6662	2018-01-08	5	22	154	0	0.421918	young	3.32	6	5.9	3.23	FALSE	Yes	87	Chihuahua - Smooth Coat		1	Small	M	2017-08-07	FALSE	FALSE		180	old
10781	7010	2018-01-08	79	344.286	2410	6	6.60274	middle-aged	3.77	5.81	5.8	3.01	FALSE	Yes	217	Welsh Corgi - Pembroke		2	Medium	M	2011-06-04	FALSE	FALSE		181	old
10783	5613	2018-01-08	33	147.429	1032	2	2.8274	young	3.77	5.9	5.8	4.26	FALSE	Yes	231	Pug		1	Small	M	2015-03-13	FALSE	FALSE		182	old
10784	6137	2018-01-08	10	45.5714	319	0	0.873973	young	4.15	6	6	3.68	FALSE	Yes	231	Pug		1	Small	M	2017-02-23	FALSE	FALSE		183	old
10785	5251	2018-01-08	140	613	4291	11	11.7562	old	3.97	6	5.9	4.26	TRUE	Yes	303	West Highland White Terrier		1	Small	F	2006-04-10	FALSE	TRUE		184	old
10786	7012	2018-01-08	56	247.857	1735	4	4.75342	middle-aged	4.15	6	5.36	3.19	FALSE	Yes	5	Mixed (Medium)		2	Medium	M	2013-04-09	FALSE	FALSE		185	old
10767	6379	2018-01-07	82	358.857	2512	6	6.88219	middle-aged	4.09	6	5.89	4.26	FALSE	Yes	177	Retriever - Labrador		3	Large	M	2011-02-21	FALSE	FALSE		186	old
10770	6023	2018-01-07	12	53.2857	373	1	1.02192	young	4.15	6	5.36	4.26	FALSE	Yes	5	Mixed (Medium)		2	Medium	F	2016-12-30	FALSE	FALSE		187	old
10771	1581	2018-01-07	48	212.857	1490	4	4.08219	middle-aged	3.11	5.91	5.9	3.72	FALSE	Yes	4	Mixed (Small)		1	Small	M	2013-12-09	FALSE	FALSE		188	old
10762	7002	2018-01-06	51	223	1561	4	4.27671	middle-aged	3.75	6	5.9	3.72	FALSE	Yes	98	Collie - Rough Coat		2	Medium	F	2013-09-28	FALSE	FALSE		189	old
10752	6641	2018-01-05	5	23.8571	167	0	0.457534	young	4.08	5.9	6	4.01	FALSE	Yes	96	Spaniel - English Cocker		2	Medium	M	2017-07-22	FALSE	FALSE		190	old
10753	6198	2018-01-05	82	357.143	2500	6	6.84932	middle-aged	3.37	5.33	5.78	2.64	FALSE	Yes	177	Retriever - Labrador		3	Large	F	2011-03-03	FALSE	FALSE		191	old
10754	6998	2018-01-05	55	239.714	1678	4	4.59726	middle-aged	3.74	6	5.9	4.26	FALSE	Yes	231	Pug		1	Small	M	2013-06-02	FALSE	FALSE		192	old
10755	6999	2018-01-05	48	212.857	1490	4	4.08219	middle-aged	4.15	6	6	4.26	FALSE	Yes	62	Boston Terrier		1	Small	F	2013-12-07	FALSE	FALSE		193	old
10756	7000	2018-01-05	25	110.429	773	2	2.11781	young	4.15	5.39	6	4.26	FALSE	Yes	223	Pomeranian		1	Small	F	2015-11-24	FALSE	FALSE		194	old
10739	1694	2018-01-04	36	160.143	1121	3	3.07123	young	3.34	5.15	5.27	3.39	FALSE	qol.transition_question.answer.yes	5	Mixed (Medium)		2	Medium	M	2014-12-10	FALSE	FALSE		195	old
10740	6988	2018-01-04	4	17.7143	124	0	0.339726	young	4.09	6	5.91	3.8	FALSE	Yes	96	Spaniel - English Cocker		2	Medium	F	2017-09-02	FALSE	FALSE		196	old
10744	6991	2018-01-04	128	557.857	3905	10	10.6986	old	3.06	4.83	4.44	3.26	TRUE	Yes	132	German Pointer - Wirehaired		3	Large	M	2007-04-27	FALSE	FALSE		197	old
10735	4936	2018-01-03	17	76.4286	535	1	1.46575	young	4.15	5.39	6	4.26	FALSE	Yes	179	Lakeland Terrier		2	Medium	F	2016-07-17	FALSE	TRUE		198	old
10725	6365	2018-01-02	10	44.7143	313	0	0.857534	young	4.09	5.39	6	3.39	FALSE	Yes	136	Retriever - Golden		3	Large	M	2017-02-23	FALSE	FALSE		199	old
10726	5640	2018-01-02	14	62.2857	436	1	1.19452	young	3.46	5.84	5.89	3.72	FALSE	Yes	156	Setter - Irish		3	Large	M	2016-10-23	FALSE	FALSE		200	old
10732	6984	2018-01-02	96	417.857	2925	8	8.0137	old	2.64	5.04	5.38	2.97	TRUE	Yes	274	Spaniel - English Springer		2	Medium	F	2009-12-30	FALSE	FALSE		201	old
10720	4586	2018-01-01	36	160.429	1123	3	3.07671	young	4.09	5.91	5.47	2.97	FALSE	Yes	177	Retriever - Labrador		3	Large	F	2014-12-05	FALSE	TRUE		202	old
10723	6982	2018-01-01	14	62.8571	440	1	1.20548	young	2.7	5.36	5.3	3.97	FALSE	Yes	95	Cockapoo / Cockerpoo / Spoodle (X Spaniel/Poodle)		2	Medium	M	2016-10-18	FALSE	FALSE		203	old
10724	6983	2018-01-01	4	18	126	0	0.345205	young	4.15	6	6	4.26	FALSE	Yes	137	Goldendoodle (X Golden Retriever/Poodle)		3	Large	F	2017-08-28	FALSE	FALSE		204	old
10713	6614	2017-12-31	95	413.429	2894	7	7.92877	middle-aged	2.45	4.89	5.23	2.19	FALSE	qol.transition_question.answer.yes	101	Cross Breed (Unknown X )/ Mongrel		4	Extra Large	M	2010-01-28	FALSE	FALSE		205	old
10714	2371	2017-12-31	34	150.286	1052	2	2.88219	young	3.63	6	6	4.26	FALSE	Yes	95	Cockapoo / Cockerpoo / Spoodle (X Spaniel/Poodle)		2	Medium	M	2015-02-13	FALSE	FALSE		206	old
10715	4726	2017-12-31	29	128.143	897	2	2.45753	young	3.58	5.21	4.81	3.09	FALSE	Yes	232	Puggle (X Pug/ Beagle)		1	Small	M	2015-07-18	FALSE	FALSE		207	old
10716	5913	2017-12-31	12	53.7143	376	1	1.03014	young	4.15	6	6	4.26	FALSE	Yes	101	Cross Breed (Unknown X )/ Mongrel		4	Extra Large	M	2016-12-20	FALSE	FALSE		208	old
10717	6488	2017-12-31	8	39	273	0	0.747945	young	3.59	5.91	5.81	2.48	FALSE	Yes	64	Boxer		3	Large	M	2017-04-02	FALSE	FALSE
10711	6977	2017-12-30	15	65.1429	456	1	1.24932	young	4.15	5.82	5.36	3.68	FALSE	Yes	72	Bulldog - British		2	Medium	F	2016-09-30	FALSE	FALSE
10704	4766	2017-12-29	19	86.5714	606	1	1.66027	young	3.7	5.91	6	3.97	FALSE	Yes	231	Pug		1	Small	M	2016-05-02	FALSE	FALSE
10705	1595	2017-12-29	48	210	1470	4	4.0274	middle-aged	3.79	6	5.41	4.26	FALSE	Yes	4	Mixed (Small)		1	Small	M	2013-12-20	FALSE	FALSE
10706	6976	2017-12-29	155	674.143	4719	12	12.9288	old	3.86	6	5.78	4.26	TRUE	Yes	284	Bull Terrier - Staffordshire		2	Medium	M	2005-01-27	FALSE	FALSE
10708	5000	2017-12-29	20	88	616	1	1.68767	young	4.15	6	6	4.26	FALSE	Yes	177	Retriever - Labrador		3	Large	M	2016-04-22	FALSE	FALSE
10696	6974	2017-12-28	43	190.571	1334	3	3.65479	young	2.82	5.57	5.16	2.35	FALSE	Yes	284	Bull Terrier - Staffordshire		2	Medium	M	2014-05-04	FALSE	FALSE
10697	6975	2017-12-28	27	119.714	838	2	2.29589	young	4.09	6	6	3.19	FALSE	Yes	284	Bull Terrier - Staffordshire		2	Medium	M	2015-09-12	FALSE	FALSE
10698	6136	2017-12-28	15	68.1429	477	1	1.30685	young	4.07	6	6	4.26	FALSE	Yes	199	Schnauzer (Miniature)		1	Small	F	2016-09-07	FALSE	FALSE
10702	3728	2017-12-28	25	113	791	2	2.16712	young	3.58	5.35	4.63	3.8	FALSE	Yes	261	Shih Tzu		1	Small	F	2015-10-29	FALSE	FALSE
10693	6972	2017-12-27	12	53.1429	372	1	1.01918	young	3.79	5.33	5.31	3.26	FALSE	Yes	4	Mixed (Small)		1	Small	M	2016-12-20	FALSE	FALSE
10687	4970	2017-12-26	121	526.714	3687	10	10.1014	old	4.07	6	6	4.26	TRUE	Yes	215	Patterdale Terrier		1	Small	F	2007-11-22	FALSE	FALSE
10686	6969	2017-12-25	101	443.286	3103	8	8.50137	old	1.96	5.55	5.8	2.85	TRUE	Yes	144	Greyhound		3	Large	F	2009-06-27	FALSE	FALSE
10683	6607	2017-12-23	60	261.857	1833	5	5.02192	middle-aged	3.8	5.91	6	2.94	FALSE	qol.transition_question.answer.yes	215	Patterdale Terrier		1	Small	F	2012-12-16	FALSE	FALSE
10674	6543	2017-12-22	7	30.8571	216	0	0.591781	young	4.01	5.91	6	2.52	FALSE	Yes	284	Bull Terrier - Staffordshire		2	Medium	M	2017-05-20	FALSE	FALSE
10675	6966	2017-12-22	33	144	1008	2	2.76164	young	3.68	5.63	5.47	2.69	FALSE	Yes	140	Great Dane		4	Extra Large	F	2015-03-20	FALSE	TRUE
10676	5106	2017-12-22	25	111	777	2	2.12877	young	3.9	6	5.9	4.01	FALSE	Yes	101	Cross Breed (Unknown X )/ Mongrel		4	Extra Large	F	2015-11-06	FALSE	FALSE
10677	6338	2017-12-22	9	40.1429	281	0	0.769863	young	4.15	6	6	4.26	FALSE	Yes	59	Border Collie		2	Medium	M	2017-03-16	FALSE	FALSE
10678	6967	2017-12-22	108	469.857	3289	9	9.01096	old	3.63	6	6	3.97	TRUE	Yes	274	Spaniel - English Springer		2	Medium	M	2008-12-20	FALSE	FALSE
10670	6964	2017-12-21	18	81.5714	571	1	1.56438	young	4.15	6	6	4.26	FALSE	qol.transition_question.answer.yes	162	Jack Chi (X Jack Russell/Chihuahua)		1	Small	M	2016-05-29	FALSE	FALSE
10671	6599	2017-12-21	80	349.143	2444	6	6.69589	middle-aged	2.79	6	5.7	3.77	FALSE	Yes	59	Border Collie		2	Medium	M	2011-04-13	FALSE	TRUE
10672	6598	2017-12-21	33	146.429	1025	2	2.80822	young	4.01	6	5.91	3.01	FALSE	Yes	129	German Pointer- Shorthaired		3	Large	F	2015-03-02	FALSE	FALSE
10661	2632	2017-12-20	36	158.286	1108	3	3.03562	young	4.07	5.91	6	3.97	FALSE	Yes	96	Spaniel - English Cocker		2	Medium	M	2014-12-08	FALSE	FALSE
10665	1268	2017-12-20	80	348	2436	6	6.67397	middle-aged	3.6	6	6	3.97	FALSE	Yes	163	Jack/Parson Russell Terrier		1	Small	M	2011-04-20	FALSE	FALSE
10666	2186	2017-12-20	58	254	1778	4	4.87123	middle-aged	4.15	5.9	5.77	3.39	FALSE	Yes	40	Bearded Collie		3	Large	M	2013-02-06	FALSE	FALSE
10647	3397	2017-12-18	40	177.571	1243	3	3.40548	young	3.69	6	5.9	3.72	FALSE	Yes	4	Mixed (Small)		1	Small	F	2014-07-24	FALSE	FALSE
10648	6957	2017-12-18	47	208.571	1460	3	4	young	3.55	5.82	6	2.61	FALSE	Yes	96	Spaniel - English Cocker		2	Medium	F	2013-12-19	FALSE	FALSE
10645	6954	2017-12-17	73	317.857	2225	6	6.09589	middle-aged	3.77	6	6	2.9	FALSE	Yes	96	Spaniel - English Cocker		2	Medium	F	2011-11-14	FALSE	FALSE
10642	6953	2017-12-16	29	127.286	891	2	2.4411	young	3.93	6	6	4.26	FALSE	Yes	136	Retriever - Golden		3	Large	M	2015-07-09	FALSE	FALSE
10636	4088	2017-12-15	28	122.571	858	2	2.35068	young	4.06	6	6	4.26	FALSE	Yes	95	Cockapoo / Cockerpoo / Spoodle (X Spaniel/Poodle)		2	Medium	F	2015-08-10	FALSE	FALSE
10639	6511	2017-12-15	9	41.7143	292	0	0.8	young	4.15	5.37	5.36	2.78	FALSE	Yes	96	Spaniel - English Cocker		2	Medium	F	2017-02-26	FALSE	FALSE
10632	3205	2017-12-14	167	729.143	5104	13	13.9836	old	2.75	5.91	5.7	4.26	TRUE	Yes	52	Bichon Frise		1	Small	M	2003-12-24	FALSE	TRUE
10623	5313	2017-12-13	118	516.571	3616	9	9.90685	old	4.15	6	6	4.26	TRUE	Yes	104	Dalmation		3	Large	M	2008-01-19	FALSE	FALSE
10624	5311	2017-12-13	118	516.571	3616	9	9.90685	old	4.15	6	6	4.26	TRUE	Yes	104	Dalmation		3	Large	M	2008-01-19	FALSE	FALSE
10627	6251	2017-12-13	54	235.857	1651	4	4.52329	middle-aged	4.15	6	6	3.97	FALSE	qol.transition_question.answer.yes	96	Spaniel - English Cocker		2	Medium	M	2013-06-06	FALSE	FALSE
10628	6285	2017-12-13	93	407.143	2850	7	7.80822	middle-aged	4.15	6	6	4.26	FALSE	Yes	292	Tibetan Terrier		2	Medium	M	2010-02-23	FALSE	FALSE
10619	6948	2017-12-12	46	201	1407	3	3.85479	young	3.67	5.03	5.79	3.48	FALSE	Yes	245	Rhodesian Ridgeback		3	Large	M	2014-02-04	FALSE	FALSE
10611	6943	2017-12-11	71	313	2191	5	6.00274	middle-aged	4.09	5.9	5.47	3.22	FALSE	Yes	177	Retriever - Labrador		3	Large	M	2011-12-12	FALSE	FALSE
10612	6944	2017-12-11	59	257.857	1805	4	4.94521	middle-aged	4.03	5.48	5.42	4.26	FALSE	Yes	177	Retriever - Labrador		3	Large	M	2013-01-01	FALSE	FALSE
10613	5854	2017-12-11	13	60	420	1	1.15068	young	3.16	5.82	5.51	3.48	FALSE	Yes	9	Airedale Terrier		3	Large	M	2016-10-17	FALSE	FALSE
10615	6945	2017-12-11	48	210.571	1474	4	4.03836	middle-aged	2.99	5.63	6	4.26	FALSE	Yes	101	Cross Breed (Unknown X )/ Mongrel		4	Extra Large	M	2013-11-28	FALSE	FALSE
10603	6940	2017-12-10	67	292.286	2046	5	5.60548	middle-aged	3.85	6	6	4.26	FALSE	Yes	5	Mixed (Medium)		2	Medium	F	2012-05-04	FALSE	FALSE
10604	6545	2017-12-10	5	22	154	0	0.421918	young	4.07	5.37	6	4.26	FALSE	Yes	5	Mixed (Medium)		2	Medium	M	2017-07-09	FALSE	FALSE
10599	5341	2017-12-09	96	417.714	2924	8	8.01096	old	3.02	5.23	5.58	3.84	TRUE	Yes	136	Retriever - Golden		3	Large	M	2009-12-07	FALSE	TRUE
10600	6938	2017-12-09	48	211.714	1482	4	4.06027	middle-aged	4.15	6	6	2.52	FALSE	Yes	163	Jack/Parson Russell Terrier		1	Small	M	2013-11-18	FALSE	FALSE
10601	6939	2017-12-09	44	193.286	1353	3	3.70685	young	4.15	6	6	4.26	FALSE	Yes	163	Jack/Parson Russell Terrier		1	Small	M	2014-03-27	FALSE	FALSE
10582	6130	2017-12-07	22	98	686	1	1.87945	young	3.1	4.98	5.7	3.97	FALSE	Yes	101	Cross Breed (Unknown X )/ Mongrel		4	Extra Large	M	2016-01-21	FALSE	FALSE
10583	6308	2017-12-07	113	493.286	3453	9	9.46027	old	3.4	5.81	5.81	2.77	TRUE	Yes	121	Fox Terrier - Smooth		2	Medium	F	2008-06-24	FALSE	TRUE
10587	3687	2017-12-07	26	114.143	799	2	2.18904	young	3.83	5.92	6	3.68	FALSE	Yes	177	Retriever - Labrador		3	Large	F	2015-09-30	FALSE	FALSE
10588	6933	2017-12-07	127	552.714	3869	10	10.6	old	3.04	5.26	4.97	1.68	TRUE	Yes	4	Mixed (Small)		1	Small	F	2007-05-05	FALSE	FALSE
10575	1110	2017-12-06	57	249.571	1747	4	4.7863	middle-aged	4.15	6	6	4.26	FALSE	Yes	60	Border Terrier		1	Small	F	2013-02-23	FALSE	FALSE
10576	1109	2017-12-06	54	238	1666	4	4.56438	middle-aged	4.15	6	6	4.26	FALSE	Yes	60	Border Terrier		1	Small	F	2013-05-15	FALSE	FALSE
10577	6547	2017-12-06	9	39.7143	278	0	0.761644	young	4.15	6	6	4.26	FALSE	Yes	96	Spaniel - English Cocker		2	Medium	M	2017-03-03	FALSE	FALSE
10546	2005	2017-12-03	58	255.429	1788	4	4.89863	middle-aged	4.15	6	6	3.97	FALSE	qol.transition_question.answer.yes	101	Cross Breed (Unknown X )/ Mongrel		4	Extra Large	M	2013-01-10	FALSE	FALSE
10555	6920	2017-12-03	128	558.714	3911	10	10.7151	old	3.57	6	6	4.26	TRUE	Yes	4	Mixed (Small)		1	Small	M	2007-03-20	FALSE	FALSE
10537	6536	2017-12-02	3	16.1429	113	0	0.309589	young	3.63	5.82	5.14	4.26	FALSE	Yes	96	Spaniel - English Cocker		2	Medium	M	2017-08-11	FALSE	FALSE
10539	1364	2017-12-02	123	535	3745	10	10.2603	old	4.15	6	5.85	3.97	TRUE	Yes	163	Jack/Parson Russell Terrier		1	Small	M	2007-09-01	FALSE	FALSE
10540	3763	2017-12-02	69	303.714	2126	5	5.82466	middle-aged	4.07	5.39	6	4.26	FALSE	Yes	226	Poodle (Toy)		1	Small	M	2012-02-06	FALSE	FALSE
10524	5661	2017-11-30	95	413.143	2892	7	7.92329	middle-aged	2.82	5.64	5.9	2.9	FALSE	qol.transition_question.answer.yes	101	Cross Breed (Unknown X )/ Mongrel		4	Extra Large	F	2009-12-30	FALSE	FALSE
10511	6527	2017-11-29	23	102.286	716	1	1.96164	young	2.83	5.05	4.84	2.49	FALSE	qol.transition_question.answer.yes	95	Cockapoo / Cockerpoo / Spoodle (X Spaniel/Poodle)		2	Medium	F	2015-12-14	FALSE	TRUE
10515	3221	2017-11-29	28	122.286	856	2	2.34521	young	4.15	6	6	4.26	FALSE	Yes	4	Mixed (Small)		1	Small	M	2015-07-27	FALSE	FALSE
10517	6903	2017-11-29	43	190.429	1333	3	3.65205	young	3.67	6	6	2.49	FALSE	Yes	72	Bulldog - British		2	Medium	M	2014-04-06	FALSE	TRUE
10518	6904	2017-11-29	30	134.714	943	2	2.58356	young	4.15	6	6	4.26	FALSE	Yes	5	Mixed (Medium)		2	Medium	F	2015-05-01	FALSE	TRUE
10519	6905	2017-11-29	20	87.8571	615	1	1.68493	young	4	6	6	3.97	FALSE	Yes	72	Bulldog - British		2	Medium	F	2016-03-24	FALSE	TRUE
10501	6502	2017-11-28	5	23.8571	167	0	0.457534	young	4.07	6	6	3.97	FALSE	Yes	262	Shih Tzu Poodle/Pooshih/Shih Poo (X Shih Tzu/Poodle)		1	Small	F	2017-06-14	FALSE	FALSE
10502	6894	2017-11-28	14	65.1429	456	1	1.24932	young	4.15	5.48	5.28	3.68	FALSE	Yes	4	Mixed (Small)		1	Small	F	2016-08-29	FALSE	TRUE
10504	6895	2017-11-28	109	477.143	3340	9	9.15068	old	4.15	5.39	6	4.26	TRUE	Yes	272	Soft Coated Wheaten Terrier		2	Medium	F	2008-10-06	FALSE	FALSE
10505	6896	2017-11-28	15	67.7143	474	1	1.29863	young	3.6	6	6	4.26	FALSE	Yes	86	Chihuahua - Long Coat		1	Small	M	2016-08-11	FALSE	FALSE
10489	6887	2017-11-27	17	74.8571	524	1	1.43562	young	3.61	5.92	5.81	3.55	FALSE	Yes	9	Airedale Terrier		3	Large	F	2016-06-21	FALSE	FALSE
10494	6128	2017-11-27	95	415.429	2908	7	7.96712	middle-aged	3.78	5.82	4.89	4.09	FALSE	Yes	177	Retriever - Labrador		3	Large	M	2009-12-11	FALSE	FALSE
10495	6127	2017-11-27	35	153	1071	2	2.93425	young	4.15	6	6	4.26	FALSE	Yes	177	Retriever - Labrador		3	Large	M	2014-12-22	FALSE	FALSE
10498	6892	2017-11-27	24	107.143	750	2	2.05479	young	3.13	5.91	6	4.26	FALSE	Yes	164	Japanese Akita Inu		3	Large	M	2015-11-08	FALSE	FALSE
10499	6893	2017-11-27	11	51.5714	361	0	0.989041	young	3.15	5.43	5.61	3.3	FALSE	Yes	309	Yorkshire Terrier		1	Small	F	2016-12-01	FALSE	FALSE
10478	6885	2017-11-26	19	83.2857	583	1	1.59726	young	3.95	5.3	5.9	4.26	FALSE	qol.transition_question.answer.yes	231	Pug		1	Small	M	2016-04-22	FALSE	FALSE
10463	6876	2017-11-25	98	429.857	3009	8	8.24384	old	3.13	5.45	4.02	3.2	TRUE	Yes	284	Bull Terrier - Staffordshire		2	Medium	F	2009-08-30	FALSE	FALSE
10468	6879	2017-11-25	14	61.2857	429	1	1.17534	young	3.64	5.82	5.9	2.65	FALSE	Yes	5	Mixed (Medium)		2	Medium	F	2016-09-22	FALSE	TRUE
10471	6881	2017-11-25	39	172.429	1207	3	3.30685	young	4.01	6	5.9	3.97	FALSE	Yes	60	Border Terrier		1	Small	F	2014-08-06	FALSE	FALSE
10457	6250	2017-11-24	77	337.714	2364	6	6.47671	middle-aged	3.2	6	5.37	3.22	FALSE	Yes	96	Spaniel - English Cocker		2	Medium	M	2011-06-05	FALSE	FALSE
10460	6873	2017-11-24	17	75.1429	526	1	1.4411	young	3.85	6	6	2.27	FALSE	Yes	129	German Pointer- Shorthaired		3	Large	M	2016-06-16	FALSE	FALSE
10448	6512	2017-11-23	116	505	3535	9	9.68493	old	3.52	4.94	4.54	2.72	TRUE	Yes	59	Border Collie		2	Medium	M	2008-03-20	FALSE	TRUE
10455	6872	2017-11-23	24	104.714	733	2	2.00822	young	4.15	6	6	3.97	FALSE	Yes	86	Chihuahua - Long Coat		1	Small	M	2015-11-21	FALSE	FALSE
10435	6854	2017-11-22	32	141.429	990	2	2.71233	young	3.6	6	6	4.26	FALSE	Yes	95	Cockapoo / Cockerpoo / Spoodle (X Spaniel/Poodle)		2	Medium	M	2015-03-08	FALSE	TRUE
10430	6851	2017-11-21	10	44.2857	310	0	0.849315	young	4.15	6	5.47	2.97	FALSE	Yes	274	Spaniel - English Springer		2	Medium	M	2017-01-15	FALSE	FALSE
10422	6501	2017-11-20	8	38.1429	267	0	0.731507	young	4.15	5.39	6	4.26	FALSE	Yes	96	Spaniel - English Cocker		2	Medium	F	2017-02-26	FALSE	FALSE
10429	6850	2017-11-20	38	166.286	1164	3	3.18904	young	3.96	5.39	5.36	4.26	FALSE	Yes	95	Cockapoo / Cockerpoo / Spoodle (X Spaniel/Poodle)		2	Medium	F	2014-09-13	FALSE	TRUE
10418	6843	2017-11-19	38	166.857	1168	3	3.2	young	2.82	5.12	5.8	3.68	FALSE	Yes	231	Pug		1	Small	F	2014-09-08	FALSE	FALSE
10419	6844	2017-11-19	5	22.8571	160	0	0.438356	young	4.15	5.39	6	3.1	FALSE	Yes	124	Bulldog - French		1	Small	F	2017-06-12	FALSE	FALSE
10403	3818	2017-11-18	55	242.286	1696	4	4.64658	middle-aged	4.15	6	6	4.26	FALSE	Yes	163	Jack/Parson Russell Terrier		1	Small	M	2013-03-28	FALSE	FALSE
10406	6836	2017-11-18	73	320	2240	6	6.13699	middle-aged	4.01	5.39	5.36	2.78	FALSE	Yes	186	Lurcher		3	Large	M	2011-10-01	FALSE	FALSE
10408	6837	2017-11-18	60	260.857	1826	5	5.00274	middle-aged	3.41	6	5.41	4.26	FALSE	Yes	59	Border Collie		2	Medium	F	2012-11-18	FALSE	FALSE
10409	6838	2017-11-18	73	320	2240	6	6.13699	middle-aged	4.15	6	6	4.26	FALSE	Yes	59	Border Collie		2	Medium	F	2011-10-01	FALSE	FALSE
10411	6839	2017-11-18	7	32.7143	229	0	0.627397	young	3.96	6	6	4.26	FALSE	Yes	96	Spaniel - English Cocker		2	Medium	M	2017-04-03	FALSE	FALSE
10412	6840	2017-11-18	132	575.143	4026	11	11.0301	old	2.67	5.45	5.7	2.65	TRUE	Yes	163	Jack/Parson Russell Terrier		1	Small	M	2006-11-10	FALSE	FALSE
10413	6841	2017-11-18	142	620.857	4346	11	11.9068	old	2.66	5.04	5.27	1.03	TRUE	Yes	96	Spaniel - English Cocker		2	Medium	F	2005-12-25	FALSE	FALSE
10392	5439	2017-11-17	57	250	1750	4	4.79452	middle-aged	3.54	5.73	6	3.43	FALSE	Yes	6	Mixed (Large)		3	Large	M	2013-02-01	FALSE	FALSE
10399	6831	2017-11-17	17	76.4286	535	1	1.46575	young	4.07	6	6	3.39	FALSE	Yes	309	Yorkshire Terrier		1	Small	M	2016-05-31	FALSE	FALSE
10358	6485	2017-11-15	27	118	826	2	2.26301	young	2.53	4.36	4.6	2.49	FALSE	Yes	217	Welsh Corgi - Pembroke		2	Medium	F	2015-08-12	FALSE	TRUE
10361	5619	2017-11-15	12	52.4286	367	1	1.00548	young	3.67	6	5.9	4.26	FALSE	Yes	90	Chinese Shar Pei		3	Large	M	2016-11-13	FALSE	FALSE
10362	2148	2017-11-15	133	581.143	4068	11	11.1452	old	3.11	5.46	5.72	1.77	TRUE	Yes	309	Yorkshire Terrier		1	Small	F	2006-09-26	FALSE	FALSE
10363	6494	2017-11-15	29	130.429	913	2	2.50137	young	3.58	5.62	5.8	2.52	FALSE	Yes	261	Shih Tzu		1	Small	M	2015-05-17	FALSE	FALSE
10364	2146	2017-11-15	110	480	3360	9	9.20548	old	4.07	5.49	5.91	2.72	TRUE	Yes	96	Spaniel - English Cocker		2	Medium	M	2008-09-03	FALSE	FALSE
10365	5319	2017-11-15	13	60.2857	422	1	1.15616	young	4.15	6	6	4.26	FALSE	Yes	82	King Charles Spaniel - Cavalier		1	Small	F	2016-09-19	FALSE	FALSE
10366	5169	2017-11-15	16	70.4286	493	1	1.35068	young	4.15	6	6	2.9	FALSE	Yes	128	German Shepherd / Alsatian		3	Large	F	2016-07-10	FALSE	FALSE
10367	6811	2017-11-15	82	357.143	2500	6	6.84932	middle-aged	4.15	6	5.62	3.39	FALSE	Yes	304	Whippet		2	Medium	F	2011-01-11	FALSE	FALSE
10368	6812	2017-11-15	55	243.286	1703	4	4.66575	middle-aged	4.06	6	5.34	3.72	FALSE	Yes	144	Greyhound		3	Large	F	2013-03-18	FALSE	FALSE
10338	6481	2017-11-13	5	23.4286	164	0	0.449315	young	4.09	6	5.9	3.68	FALSE	Yes	96	Spaniel - English Cocker		2	Medium	M	2017-06-02	FALSE	FALSE
10343	6795	2017-11-13	140	612.857	4290	11	11.7534	old	3.64	6	6	2.52	TRUE	Yes	38	Beagle		2	Medium	M	2006-02-14	FALSE	TRUE
10344	6796	2017-11-13	142	620	4340	11	11.8904	old	3.06	4.69	5.44	4.26	TRUE	Yes	38	Beagle		2	Medium	M	2005-12-26	FALSE	TRUE
10329	4594	2017-11-12	29	128	896	2	2.45479	young	4.01	6	5.47	1.45	FALSE	Yes	272	Soft Coated Wheaten Terrier		2	Medium	M	2015-05-31	FALSE	FALSE
10332	6444	2017-11-12	118	514.714	3603	9	9.87123	old	1.45	3.74	3.1	2.13	TRUE	Yes	6	Mixed (Large)		3	Large	F	2008-01-01	FALSE	FALSE
10326	6479	2017-11-11	5	25.5714	179	0	0.490411	young	4.09	6	6	3.68	FALSE	Yes	284	Bull Terrier - Staffordshire		2	Medium	F	2017-05-16	FALSE	FALSE
10327	6417	2017-11-11	6	28.7143	201	0	0.550685	young	3.74	5.91	5.9	3.43	FALSE	Yes	124	Bulldog - French		1	Small	M	2017-04-24	FALSE	FALSE
10318	6784	2017-11-10	4	18.8571	132	0	0.361644	young	3.7	5.72	6	4.26	FALSE	Yes	96	Spaniel - English Cocker		2	Medium	F	2017-07-01	FALSE	FALSE
10319	6785	2017-11-10	66	288	2016	5	5.52329	middle-aged	4.07	5.37	6	2.78	FALSE	Yes	82	King Charles Spaniel - Cavalier		1	Small	F	2012-05-04	FALSE	FALSE
10304	5624	2017-11-09	12	52.4286	367	1	1.00548	young	3.66	6	5.9	3.97	FALSE	Yes	176	Labradoodle (X Labrador/Poodle)		3	Large	M	2016-11-07	FALSE	TRUE
10307	4636	2017-11-09	44	195	1365	3	3.73973	young	4.15	6	6	4.26	FALSE	Yes	261	Shih Tzu		1	Small	M	2014-02-13	FALSE	TRUE
10298	4939	2017-11-08	17	76.7143	537	1	1.47123	young	3.87	5.9	5.8	4.26	TRUE	Yes	177	Retriever - Labrador		3	Large	F	2016-05-20	FALSE	FALSE
10279	6088	2017-11-05	15	67.2857	471	1	1.29041	young	4.03	5.44	6	4.26	FALSE	Yes	162	Jack Chi (X Jack Russell/Chihuahua)		1	Small	F	2016-07-22	FALSE	FALSE
10280	5629	2017-11-05	29	128.286	898	2	2.46027	young	3.36	5.51	5.81	2.23	FALSE	Yes	261	Shih Tzu		1	Small	M	2015-05-22	FALSE	FALSE
10271	6037	2017-11-04	10	44.7143	313	0	0.857534	young	3.86	5.9	5.78	3.23	FALSE	Yes	101	Cross Breed (Unknown X )/ Mongrel		4	Extra Large	M	2016-12-26	FALSE	FALSE
10256	1170	2017-11-01	62	273.571	1915	5	5.24658	middle-aged	4.09	6	6	4.26	FALSE	Yes	231	Pug		1	Small	M	2012-08-04	FALSE	FALSE
10258	4933	2017-11-01	33	147.143	1030	2	2.82192	young	4.15	6	6	4.26	FALSE	Yes	4	Mixed (Small)		1	Small	M	2015-01-06	FALSE	TRUE
10245	5477	2017-10-31	136	593.143	4152	11	11.3753	old	2.35	3.99	4.15	2.13	TRUE	Yes	60	Border Terrier		1	Small	F	2006-06-19	FALSE	FALSE
10240	6441	2017-10-30	10	45.5714	319	0	0.873973	young	4.15	6	5.87	3.72	FALSE	Yes	246	Rottweiler		3	Large	M	2016-12-15	FALSE	FALSE
10241	6750	2017-10-30	30	133	931	2	2.55068	young	3.31	5.8	4.92	2.1	FALSE	Yes	284	Bull Terrier - Staffordshire		2	Medium	M	2015-04-13	FALSE	FALSE
10242	3352	2017-10-30	101	440.429	3083	8	8.44658	old	4.15	6	5.75	3.97	TRUE	Yes	64	Boxer		3	Large	F	2009-05-22	FALSE	FALSE
10228	6421	2017-10-29	9	42.7143	299	0	0.819178	young	3.79	6	5.41	4.26	FALSE	Yes	4	Mixed (Small)		1	Small	F	2017-01-03	FALSE	FALSE
10227	2964	2017-10-28	54	236.286	1654	4	4.53151	middle-aged	4.15	6	6	4.26	FALSE	Yes	177	Retriever - Labrador		3	Large	M	2013-04-18	FALSE	FALSE
10205	6733	2017-10-25	60	261.714	1832	5	5.01918	middle-aged	3.32	5.91	5.82	3.91	FALSE	Yes	5	Mixed (Medium)		2	Medium	M	2012-10-19	FALSE	FALSE
10206	6734	2017-10-25	26	117	819	2	2.24384	young	4.01	5.91	6	4.26	FALSE	Yes	199	Schnauzer (Miniature)		1	Small	F	2015-07-29	FALSE	TRUE
10197	6082	2017-10-24	52	229.429	1606	4	4.4	middle-aged	3.29	4.39	5.9	3.43	FALSE	Yes	4	Mixed (Small)		1	Small	F	2013-06-01	FALSE	FALSE
10198	6728	2017-10-24	84	366.286	2564	7	7.02466	middle-aged	3.73	5.81	5.91	4.09	FALSE	Yes	64	Boxer		3	Large	M	2010-10-17	FALSE	TRUE
10199	6729	2017-10-24	48	212	1484	4	4.06575	middle-aged	3.26	6	6	2.4	FALSE	Yes	186	Lurcher		3	Large	F	2013-10-01	FALSE	FALSE
10202	6731	2017-10-24	26	117.143	820	2	2.24658	young	4.09	5.59	5.47	2.93	FALSE	Yes	128	German Shepherd / Alsatian		3	Large	M	2015-07-27	FALSE	FALSE
10185	6419	2017-10-23	88	385	2695	7	7.38356	middle-aged	3.67	5.18	5.68	4.09	FALSE	Yes	261	Shih Tzu		1	Small	M	2010-06-07	FALSE	FALSE
10187	2462	2017-10-23	31	135.857	951	2	2.60548	young	3.16	5.64	5.23	2.97	FALSE	Yes	177	Retriever - Labrador		3	Large	F	2015-03-17	FALSE	FALSE
10175	6351	2017-10-22	8	36.7143	257	0	0.70411	young	3.97	5.91	5.9	4.26	FALSE	Yes	231	Pug		1	Small	M	2017-02-07	FALSE	FALSE
10177	6721	2017-10-22	124	542.286	3796	10	10.4	old	3.48	5.91	5.35	2.32	TRUE	Yes	255	Scottish Terrier		2	Medium	F	2007-06-01	FALSE	TRUE
10178	6722	2017-10-22	152	660.857	4626	12	12.674	old	2.74	5.42	5.17	2.39	TRUE	Yes	74	Cairn Terrier		1	Small	M	2005-02-21	FALSE	FALSE
10179	5346	2017-10-22	39	172.429	1207	3	3.30685	young	3.98	5.9	5.36	3.72	FALSE	Yes	4	Mixed (Small)		1	Small	F	2014-07-03	FALSE	FALSE
10164	6103	2017-10-21	84	365.571	2559	7	7.01096	middle-aged	3.49	5.72	5.8	4.01	FALSE	Yes	120	Retriever - Flat-Coated		3	Large	M	2010-10-19	FALSE	FALSE
10165	6714	2017-10-21	115	503.857	3527	9	9.66301	old	3.72	5.54	6	4.26	TRUE	Yes	274	Spaniel - English Springer		2	Medium	F	2008-02-24	FALSE	FALSE
10155	6711	2017-10-20	5	22.4286	157	0	0.430137	young	4.15	6	6	2.9	FALSE	Yes	71	Bull Terrier (Miniature)		1	Small	F	2017-05-16	FALSE	FALSE
10144	4326	2017-10-19	147	639.429	4476	12	12.263	old	3.4	5.7	5.31	3.8	TRUE	Yes	6	Mixed (Large)		3	Large	M	2005-07-18	FALSE	FALSE
10147	6705	2017-10-19	15	69.4286	486	1	1.33151	young	4.15	6	6	4.26	FALSE	Yes	183	Lhasa Apso		1	Small	F	2016-06-20	FALSE	FALSE
10135	6698	2017-10-18	19	86.2857	604	1	1.65479	young	4.15	4.83	5.36	3.68	FALSE	Yes	309	Yorkshire Terrier		1	Small	M	2016-02-22	FALSE	FALSE
10136	6699	2017-10-18	45	196.429	1375	3	3.76712	young	4.15	6	5.36	3.27	FALSE	Yes	284	Bull Terrier - Staffordshire		2	Medium	M	2014-01-12	FALSE	FALSE
10137	6700	2017-10-18	78	342.429	2397	6	6.56712	middle-aged	3.23	5.37	6	2.81	FALSE	Yes	5	Mixed (Medium)		2	Medium	M	2011-03-27	FALSE	FALSE
10115	4683	2017-10-16	95	414.143	2899	7	7.94247	middle-aged	2.8	4.79	4.7	3.52	FALSE	Yes	169	Kerry Blue Terrier		2	Medium	M	2009-11-08	FALSE	FALSE
10108	6688	2017-10-14	117	510.571	3574	9	9.79178	old	3.76	6	5.9	3.68	TRUE	Yes	163	Jack/Parson Russell Terrier		1	Small	F	2008-01-01	FALSE	FALSE
10110	6689	2017-10-14	14	63.2857	443	1	1.2137	young	4.15	6	6	4.26	FALSE	Yes	5	Mixed (Medium)		2	Medium	M	2016-07-28	FALSE	TRUE
10111	5697	2017-10-14	20	87.7143	614	1	1.68219	young	4.15	6	6	4.26	FALSE	Yes	6	Mixed (Large)		3	Large	M	2016-02-08	FALSE	TRUE
10102	3213	2017-10-13	62	271.286	1899	5	5.20274	middle-aged	2.88	3.58	4.28	2.87	FALSE	Yes	231	Pug		1	Small	M	2012-08-01	FALSE	FALSE
10104	2700	2017-10-13	77	337.143	2360	6	6.46575	middle-aged	3.61	6	5.72	3.3	FALSE	Yes	309	Yorkshire Terrier		1	Small	M	2011-04-28	FALSE	FALSE
10105	5720	2017-10-13	21	91.8571	643	1	1.76164	young	4.15	5.39	6	4.26	FALSE	Yes	52	Bichon Frise		1	Small	M	2016-01-09	FALSE	FALSE
10099	6370	2017-10-12	8	35.1429	246	0	0.673973	young	4.15	6	6	4.26	FALSE	Yes	183	Lhasa Apso		1	Small	M	2017-02-08	FALSE	FALSE
10101	6685	2017-10-12	27	119	833	2	2.28219	young	3.77	5.91	5.76	4.26	FALSE	Yes	4	Mixed (Small)		1	Small	M	2015-07-02	FALSE	FALSE
10093	6677	2017-10-11	15	65.8571	461	1	1.26301	young	3.79	5.9	5.72	2.14	FALSE	Yes	177	Retriever - Labrador		3	Large	F	2016-07-07	FALSE	FALSE
10096	2516	2017-10-11	38	165.714	1160	3	3.17808	young	3.84	6	5.37	3.43	FALSE	Yes	177	Retriever - Labrador		3	Large	M	2014-08-08	FALSE	FALSE
10092	5675	2017-10-10	13	59.5714	417	1	1.14247	young	3.61	4.47	5.47	1.29	FALSE	Yes	101	Cross Breed (Unknown X )/ Mongrel		4	Extra Large	M	2016-08-19	FALSE	FALSE
10082	6671	2017-10-09	123	535.286	3747	10	10.2658	old	2.55	5.55	5.51	4.26	TRUE	Yes	231	Pug		1	Small	F	2007-07-07	FALSE	FALSE
10075	6024	2017-10-08	9	40.2857	282	0	0.772603	young	2.73	5.54	5.72	3.55	FALSE	Yes	183	Lhasa Apso		1	Small	M	2016-12-30	FALSE	FALSE
10078	3671	2017-10-08	27	118.571	830	2	2.27397	young	4.15	6	6	4.26	FALSE	Yes	101	Cross Breed (Unknown X )/ Mongrel		4	Extra Large	F	2015-07-01	FALSE	FALSE
10072	6668	2017-10-07	34	148.857	1042	2	2.85479	young	4.15	6	6	4.26	FALSE	Yes	223	Pomeranian		1	Small	M	2014-11-30	FALSE	FALSE
10073	6669	2017-10-07	85	373.571	2615	7	7.16438	middle-aged	3.3	5.34	5.43	3.26	FALSE	Yes	186	Lurcher		3	Large	M	2010-08-10	FALSE	FALSE
10068	6373	2017-10-06	8	35.1429	246	0	0.673973	young	4.07	5.9	5.47	1.52	FALSE	Yes	59	Border Collie		2	Medium	F	2017-02-02	FALSE	FALSE
10069	6666	2017-10-06	76	330.571	2314	6	6.33973	middle-aged	4.15	5.39	6	3.97	FALSE	Yes	163	Jack/Parson Russell Terrier		1	Small	F	2011-06-06	FALSE	FALSE
10070	6667	2017-10-06	76	330.571	2314	6	6.33973	middle-aged	4.15	6	6	4.26	FALSE	Yes	163	Jack/Parson Russell Terrier		1	Small	M	2011-06-06	FALSE	FALSE
10063	5573	2017-10-04	11	51.7143	362	0	0.991781	young	3.81	5.5	6	4.26	FALSE	Yes	72	Bulldog - British		2	Medium	F	2016-10-07	FALSE	FALSE
10046	6193	2017-10-03	22	97.2857	681	1	1.86575	young	3.41	1.98	3	4.26	FALSE	Yes	183	Lhasa Apso		1	Small	F	2015-11-22	FALSE	TRUE
10047	6656	2017-10-03	120	524	3668	10	10.0493	old	2.77	5.14	4.27	3.55	TRUE	Yes	259	Shetland / Sheltie Sheepdog		2	Medium	M	2007-09-18	FALSE	FALSE
10024	2698	2017-10-01	32	142.857	1000	2	2.73973	young	3.69	5.82	5.9	3.48	FALSE	Yes	120	Retriever - Flat-Coated		3	Large	M	2015-01-05	FALSE	FALSE
10025	5996	2017-10-01	18	78.2857	548	1	1.50137	young	4	6	5.47	0.99	FALSE	Yes	199	Schnauzer (Miniature)		1	Small	F	2016-04-01	FALSE	TRUE
10026	6642	2017-10-01	46	202.857	1420	3	3.89041	young	3.67	5.39	5.9	2.74	FALSE	Yes	1	Other (Small)		1	Small	M	2013-11-11	FALSE	FALSE
10027	6643	2017-10-01	28	124.143	869	2	2.38082	young	3.49	6	6	2.27	FALSE	Yes	95	Cockapoo / Cockerpoo / Spoodle (X Spaniel/Poodle)		2	Medium	M	2015-05-16	FALSE	FALSE
10020	4414	2017-09-30	29	130.286	912	2	2.49863	young	3.46	5.33	4.96	2.86	FALSE	Yes	90	Chinese Shar Pei		3	Large	M	2015-04-02	FALSE	FALSE
10015	6639	2017-09-29	23	103.429	724	1	1.98356	young	3.96	6	6	2.52	FALSE	Yes	163	Jack/Parson Russell Terrier		1	Small	M	2015-10-06	FALSE	FALSE
10018	6640	2017-09-29	12	53.5714	375	1	1.0274	young	4.03	6	5.16	3.19	FALSE	Yes	4	Mixed (Small)		1	Small	M	2016-09-19	FALSE	FALSE
10010	4109	2017-09-28	78	342.429	2397	6	6.56712	middle-aged	3.67	5.83	5.23	2.61	FALSE	Yes	252	Schnauzer (Standard)		2	Medium	M	2011-03-07	FALSE	FALSE
9997	6632	2017-09-27	11	51	357	0	0.978082	young	4.08	6	5.47	3.22	FALSE	Yes	128	German Shepherd / Alsatian		3	Large	M	2016-10-05	FALSE	FALSE
9998	6633	2017-09-27	11	49.1429	344	0	0.942466	young	4.15	6	6	4.26	FALSE	Yes	96	Spaniel - English Cocker		2	Medium	M	2016-10-18	FALSE	FALSE
10000	6343	2017-09-27	7	31.7143	222	0	0.608219	young	3.71	6	4.65	2.52	FALSE	Yes	5	Mixed (Medium)		2	Medium	F	2017-02-17	FALSE	FALSE
9985	6631	2017-09-26	62	272.857	1910	5	5.23288	middle-aged	3.35	4.51	5.37	2.19	FALSE	Yes	179	Lakeland Terrier		2	Medium	M	2012-07-04	FALSE	FALSE
9981	5737	2017-09-25	25	110.714	775	2	2.12329	young	4.15	5.39	6	4.26	FALSE	Yes	224	Poodle (Miniature)		2	Medium	M	2015-08-12	FALSE	FALSE
9972	2903	2017-09-24	69	303.714	2126	5	5.82466	middle-aged	3.57	6	5.26	2.65	FALSE	Yes	163	Jack/Parson Russell Terrier		1	Small	M	2011-11-29	FALSE	TRUE
9973	6618	2017-09-24	4	21.5714	151	0	0.413699	young	4.15	6	5.32	1.23	FALSE	Yes	124	Bulldog - French		1	Small	M	2017-04-26	FALSE	FALSE
9974	6619	2017-09-24	58	252.714	1769	4	4.84658	middle-aged	3.61	5.39	6	3.14	FALSE	Yes	284	Bull Terrier - Staffordshire		2	Medium	F	2012-11-20	FALSE	FALSE
9975	6620	2017-09-24	73	321.286	2249	6	6.16164	middle-aged	3.52	5.8	5.9	2.56	FALSE	Yes	177	Retriever - Labrador		3	Large	F	2011-07-29	FALSE	FALSE
9976	6621	2017-09-24	3	16	112	0	0.306849	young	3.67	5.82	5.91	3.55	FALSE	Yes	136	Retriever - Golden		3	Large	F	2017-06-04	FALSE	FALSE
9971	6617	2017-09-23	32	139.857	979	2	2.68219	young	4	5.79	5.91	2.35	FALSE	Yes	98	Collie - Rough Coat		2	Medium	F	2015-01-18	FALSE	FALSE
9965	5184	2017-09-22	88	386	2702	7	7.40274	middle-aged	2.84	5.63	5.9	3.97	FALSE	Yes	304	Whippet		2	Medium	M	2010-04-30	FALSE	FALSE
9957	6610	2017-09-21	7	31.5714	221	0	0.605479	young	4.06	5.39	5.06	2	FALSE	Yes	124	Bulldog - French		1	Small	F	2017-02-12	FALSE	FALSE
9959	5642	2017-09-21	49	215.143	1506	4	4.12603	middle-aged	4.15	6	6	4.26	FALSE	Yes	176	Labradoodle (X Labrador/Poodle)		3	Large	M	2013-08-07	FALSE	FALSE
9962	6613	2017-09-21	6	27	189	0	0.517808	young	3.54	6	5.71	2.43	FALSE	Yes	183	Lhasa Apso		1	Small	F	2017-03-16	FALSE	FALSE
9963	6222	2017-09-21	7	32.7143	229	0	0.627397	young	3.78	5.72	5.91	3.01	FALSE	Yes	103	Dachshund (Standard)		2	Medium	M	2017-02-04	FALSE	FALSE
9945	6602	2017-09-20	14	63.4286	444	1	1.21644	young	4.15	6	6	2.52	FALSE	Yes	231	Pug		1	Small	M	2016-07-03	FALSE	FALSE
9948	6605	2017-09-20	26	115.429	808	2	2.2137	young	3.2	5.91	5.9	2.11	FALSE	Yes	199	Schnauzer (Miniature)		1	Small	F	2015-07-05	FALSE	FALSE
9952	4968	2017-09-20	86	374.143	2619	7	7.17534	middle-aged	4.15	6	6	4.26	FALSE	Yes	98	Collie - Rough Coat		2	Medium	F	2010-07-20	FALSE	FALSE
9934	1705	2017-09-18	52	226.286	1584	4	4.33973	middle-aged	4.15	6	6	4.26	FALSE	Yes	163	Jack/Parson Russell Terrier		1	Small	M	2013-05-18	FALSE	FALSE
9928	6595	2017-09-16	39	171.286	1199	3	3.28493	young	4.07	5.29	6	2.65	FALSE	Yes	163	Jack/Parson Russell Terrier		1	Small	M	2014-06-05	FALSE	FALSE
9929	6596	2017-09-16	7	32.1429	225	0	0.616438	young	4.15	6	6	4.26	FALSE	Yes	231	Pug		1	Small	F	2017-02-03	FALSE	FALSE
9919	6585	2017-09-15	3	17.2857	121	0	0.331507	young	4.15	6	6	4.26	FALSE	Yes	303	West Highland White Terrier		1	Small	F	2017-05-17	FALSE	FALSE
9923	6591	2017-09-15	62	272.571	1908	5	5.2274	middle-aged	4.07	6	6	3.43	FALSE	Yes	274	Spaniel - English Springer		2	Medium	M	2012-06-25	FALSE	FALSE
9924	6592	2017-09-15	18	79.1429	554	1	1.51781	young	4.15	5.39	6	4.26	FALSE	Yes	274	Spaniel - English Springer		2	Medium	F	2016-03-10	FALSE	TRUE
9925	6593	2017-09-15	89	390.286	2732	7	7.48493	middle-aged	3.9	6	6	2.2	FALSE	Yes	303	West Highland White Terrier		1	Small	M	2010-03-24	FALSE	FALSE
9914	6582	2017-09-14	8	35.8571	251	0	0.687671	young	3.24	5.13	5.9	2.11	FALSE	Yes	103	Dachshund (Standard)		2	Medium	M	2017-01-06	FALSE	FALSE
9902	6576	2017-09-13	14	64.2857	450	1	1.23288	young	3.58	5.3	5.9	3.43	FALSE	Yes	5	Mixed (Medium)		2	Medium	M	2016-06-20	FALSE	FALSE
9908	6129	2017-09-13	40	174.714	1223	3	3.35068	young	4.15	6	6	2.9	FALSE	Yes	128	German Shepherd / Alsatian		3	Large	M	2014-05-09	FALSE	FALSE
9895	6570	2017-09-12	41	181.143	1268	3	3.47397	young	2.96	5.66	5.38	4.26	FALSE	Yes	136	Retriever - Golden		3	Large	F	2014-03-24	FALSE	FALSE
9896	3685	2017-09-12	23	102.429	717	1	1.96438	young	4.15	6	6	4.26	FALSE	Yes	292	Tibetan Terrier		2	Medium	F	2015-09-26	FALSE	FALSE
9897	6572	2017-09-12	77	337.714	2364	6	6.47671	middle-aged	4.01	6	6	3.72	FALSE	Yes	101	Cross Breed (Unknown X )/ Mongrel		4	Extra Large	M	2011-03-24	FALSE	FALSE
9898	6573	2017-09-12	92	401.143	2808	7	7.69315	middle-aged	4.09	6	5.89	3.72	FALSE	Yes	101	Cross Breed (Unknown X )/ Mongrel		4	Extra Large	F	2010-01-04	FALSE	FALSE
9899	6574	2017-09-12	48	212.571	1488	4	4.07671	middle-aged	3.85	5.39	6	3.48	FALSE	Yes	101	Cross Breed (Unknown X )/ Mongrel		4	Extra Large	F	2013-08-16	FALSE	FALSE
9887	5700	2017-09-11	12	53.8571	377	1	1.03288	young	4.15	6	6	4.26	FALSE	Yes	225	Poodle (Standard)		3	Large	F	2016-08-30	FALSE	FALSE
9889	6568	2017-09-11	9	41.7143	292	0	0.8	young	3.99	5.39	6	4.26	FALSE	Yes	163	Jack/Parson Russell Terrier		1	Small	F	2016-11-23	FALSE	FALSE
9877	6291	2017-09-09	30	134	938	2	2.56986	young	3.21	5.91	5.1	3.97	FALSE	Yes	231	Pug		1	Small	M	2015-02-14	FALSE	FALSE
9878	2093	2017-09-09	139	605.714	4240	11	11.6164	old	3.2	5.81	4.68	3.26	TRUE	Yes	303	West Highland White Terrier		1	Small	F	2006-01-30	FALSE	FALSE
9880	6563	2017-09-09	3	16.2857	114	0	0.312329	young	3.67	5.91	5.7	4.26	FALSE	Yes	103	Dachshund (Standard)		2	Medium	M	2017-05-18	FALSE	FALSE
9866	6559	2017-09-07	8	38.8571	272	0	0.745205	young	4.07	6	6	3.68	FALSE	qol.transition_question.answer.yes	183	Lhasa Apso		1	Small	F	2016-12-09	FALSE	FALSE
9867	5715	2017-09-07	26	113.571	795	2	2.17808	young	4.15	6	6	4.26	FALSE	Yes	96	Spaniel - English Cocker		2	Medium	F	2015-07-05	FALSE	FALSE
9868	6560	2017-09-07	48	212.571	1488	4	4.07671	middle-aged	3.93	6	5.22	4.26	FALSE	Yes	57	Boerboel / South African Mastiff		3	Large	F	2013-08-11	FALSE	TRUE
9873	6561	2017-09-07	36	159.286	1115	3	3.05479	young	4.09	5.21	5.48	3.43	FALSE	Yes	96	Spaniel - English Cocker		2	Medium	M	2014-08-19	FALSE	FALSE
9861	6284	2017-09-06	14	61.7143	432	1	1.18356	young	3.58	5.91	5.8	4.26	FALSE	Yes	199	Schnauzer (Miniature)		1	Small	M	2016-07-01	FALSE	FALSE
9862	6557	2017-09-06	5	23.4286	164	0	0.449315	young	3.34	6	6	4.26	FALSE	qol.transition_question.answer.yes	59	Border Collie		2	Medium	F	2017-03-26	FALSE	FALSE
9855	6556	2017-09-05	4	20.1429	141	0	0.386301	young	3	5.33	5.28	2.13	FALSE	Yes	120	Retriever - Flat-Coated		3	Large	F	2017-04-17	FALSE	FALSE
9846	6221	2017-09-04	24	106.429	745	2	2.0411	young	3.96	5.29	6	4.26	FALSE	Yes	82	King Charles Spaniel - Cavalier		1	Small	M	2015-08-21	FALSE	FALSE
9835	4339	2017-09-03	23	100.286	702	1	1.92329	young	3.88	6	6	4.26	FALSE	Yes	163	Jack/Parson Russell Terrier		1	Small	F	2015-10-02	FALSE	FALSE
9839	6176	2017-09-03	18	79.8571	559	1	1.53151	young	3.42	5.63	6	4.26	FALSE	Yes	4	Mixed (Small)		1	Small	F	2016-02-22	FALSE	FALSE
9830	6544	2017-09-02	86	376.143	2633	7	7.2137	middle-aged	3.71	6	6	1.04	FALSE	Yes	68	Brittany		2	Medium	F	2010-06-18	FALSE	FALSE
9822	6538	2017-09-01	103	451.857	3163	8	8.66575	old	3.68	5.73	6	3.43	TRUE	Yes	4	Mixed (Small)		1	Small	M	2009-01-03	FALSE	FALSE
9823	6539	2017-09-01	103	451.857	3163	8	8.66575	old	3.95	6	5.9	3.19	TRUE	Yes	4	Mixed (Small)		1	Small	M	2009-01-03	FALSE	FALSE
9824	6540	2017-09-01	76	330.714	2315	6	6.34247	middle-aged	4.09	5.91	6	2.9	FALSE	Yes	284	Bull Terrier - Staffordshire		2	Medium	F	2011-05-01	FALSE	FALSE
9825	6541	2017-09-01	13	56.8571	398	1	1.09041	young	4.15	6	6	2.52	FALSE	Yes	163	Jack/Parson Russell Terrier		1	Small	F	2016-07-30	FALSE	FALSE
9821	6537	2017-08-31	14	64.7143	453	1	1.2411	young	3.96	6	6	3.39	FALSE	Yes	177	Retriever - Labrador		3	Large	M	2016-06-04	FALSE	TRUE
9812	6535	2017-08-29	11	47.8571	335	0	0.917808	young	3.39	5.82	5.41	3.14	FALSE	Yes	199	Schnauzer (Miniature)		1	Small	F	2016-09-28	FALSE	FALSE
9800	6528	2017-08-27	59	257.857	1805	4	4.94521	middle-aged	3.94	6	5.78	4.26	FALSE	Yes	71	Bull Terrier (Miniature)		1	Small	F	2012-09-17	FALSE	FALSE
9801	6529	2017-08-27	54	237.714	1664	4	4.5589	middle-aged	4.15	6	6	3.72	FALSE	Yes	59	Border Collie		2	Medium	F	2013-02-05	FALSE	FALSE
9803	3107	2017-08-27	96	417.857	2925	8	8.0137	old	3.51	5.91	5.37	3.55	TRUE	Yes	101	Cross Breed (Unknown X )/ Mongrel		4	Extra Large	F	2009-08-24	FALSE	TRUE
9795	4394	2017-08-26	20	87.5714	613	1	1.67945	young	3.62	5.91	6	3.39	FALSE	Yes	96	Spaniel - English Cocker		2	Medium	F	2015-12-22	FALSE	FALSE
9796	6526	2017-08-26	70	305.429	2138	5	5.85753	middle-aged	3.62	5.71	4.89	2.56	FALSE	Yes	129	German Pointer- Shorthaired		3	Large	M	2011-10-19	FALSE	TRUE
9788	6521	2017-08-25	21	94.7143	663	1	1.81644	young	4.15	6	6	3.97	FALSE	Yes	140	Great Dane		4	Extra Large	M	2015-11-01	FALSE	FALSE
9789	6522	2017-08-25	17	76.7143	537	1	1.47123	young	4.15	6	6	4.26	FALSE	Yes	103	Dachshund (Standard)		2	Medium	M	2016-03-06	FALSE	FALSE
9790	6523	2017-08-25	21	94.7143	663	1	1.81644	young	4.15	6	6	4.26	FALSE	Yes	177	Retriever - Labrador		3	Large	F	2015-11-01	FALSE	FALSE
9791	4732	2017-08-25	47	208.571	1460	3	4	young	3.69	6	5.68	3.43	FALSE	Yes	103	Dachshund (Standard)		2	Medium	F	2013-08-26	FALSE	FALSE
9793	6261	2017-08-25	5	23.1429	162	0	0.443836	young	3.76	5.39	5.81	2.19	FALSE	Yes	60	Border Terrier		1	Small	F	2017-03-16	FALSE	FALSE
9794	6525	2017-08-25	103	451.143	3158	8	8.65205	old	3.67	5.72	5.8	3.84	TRUE	Yes	96	Spaniel - English Cocker		2	Medium	F	2009-01-01	FALSE	TRUE
9777	6516	2017-08-24	22	99	693	1	1.89863	young	3.08	4.14	4.88	3.28	FALSE	Yes	183	Lhasa Apso		1	Small	F	2015-10-01	FALSE	FALSE
9780	5509	2017-08-24	26	116.429	815	2	2.23288	young	3.44	4.93	5.9	4.26	FALSE	Yes	231	Pug		1	Small	M	2015-06-01	FALSE	FALSE
9773	6515	2017-08-23	109	474.429	3321	9	9.09863	old	4.03	6	5.9	4.26	TRUE	Yes	74	Cairn Terrier		1	Small	F	2008-07-20	FALSE	FALSE
9775	6217	2017-08-23	20	89.8571	629	1	1.72329	young	3.31	5.92	5.81	2.32	FALSE	Yes	59	Border Collie		2	Medium	M	2015-12-03	FALSE	FALSE
9769	6197	2017-08-22	7	33.5714	235	0	0.643836	young	3.87	5.91	5.9	3.43	FALSE	Yes	4	Mixed (Small)		1	Small	F	2016-12-30	FALSE	FALSE
9761	6510	2017-08-20	85	371.429	2600	7	7.12329	middle-aged	4.15	6	6	4.26	FALSE	Yes	101	Cross Breed (Unknown X )/ Mongrel		4	Extra Large	M	2010-07-08	FALSE	FALSE
9762	5115	2017-08-20	107	468.429	3279	8	8.98356	old	3.53	5.21	5.47	2.35	TRUE	Yes	138	Setter - Gordon		3	Large	F	2008-08-28	FALSE	FALSE
9757	5452	2017-08-19	31	139	973	2	2.66575	young	3.5	6	5.8	2.39	FALSE	Yes	177	Retriever - Labrador		3	Large	M	2014-12-20	FALSE	FALSE
9749	6504	2017-08-18	43	190	1330	3	3.64384	young	2.91	5.47	5.51	3.26	FALSE	Yes	199	Schnauzer (Miniature)		1	Small	F	2013-12-27	FALSE	FALSE
9750	6505	2017-08-18	45	196.143	1373	3	3.76164	young	2.79	5.82	5.8	3.48	FALSE	Yes	259	Shetland / Sheltie Sheepdog		2	Medium	F	2013-11-14	FALSE	FALSE
9751	6506	2017-08-18	55	240.429	1683	4	4.61096	middle-aged	3.14	5.39	5.61	3.72	FALSE	Yes	309	Yorkshire Terrier		1	Small	F	2013-01-08	FALSE	FALSE
9736	6226	2017-08-15	30	130.714	915	2	2.50685	young	3.47	6	6	3.68	FALSE	Yes	1	Other (Small)		1	Small	F	2015-02-12	FALSE	FALSE
9737	5431	2017-08-15	36	160.286	1122	3	3.07397	young	4.15	6	5.75	4.26	FALSE	Yes	163	Jack/Parson Russell Terrier		1	Small	M	2014-07-20	FALSE	FALSE
9738	5538	2017-08-15	58	255.571	1789	4	4.90137	middle-aged	4.07	5.54	4.78	3.3	FALSE	Yes	163	Jack/Parson Russell Terrier		1	Small	M	2012-09-21	FALSE	FALSE
9739	6496	2017-08-15	56	247.429	1732	4	4.74521	middle-aged	3.05	5.74	5.72	4.09	FALSE	Yes	13	Malamute - Alaskan		4	Extra Large	M	2012-11-17	FALSE	TRUE
9740	6497	2017-08-15	79	345.429	2418	6	6.62466	middle-aged	2.85	5.31	6	4.26	FALSE	Yes	6	Mixed (Large)		3	Large	M	2011-01-01	FALSE	FALSE
9726	6492	2017-08-14	51	222.571	1558	4	4.26849	middle-aged	3.71	5.42	5.18	2.81	FALSE	Yes	1	Other (Small)		1	Small	F	2013-05-09	FALSE	TRUE
9721	6490	2017-08-13	83	361.143	2528	6	6.92603	middle-aged	3.34	5.61	5.9	3.43	FALSE	Yes	90	Chinese Shar Pei		3	Large	F	2010-09-11	FALSE	FALSE
9723	6177	2017-08-13	7	32.5714	228	0	0.624658	young	2.19	3.81	3.75	2.13	FALSE	Yes	204	Newfoundland		4	Extra Large	M	2016-12-28	FALSE	FALSE
9718	6487	2017-08-11	5	25.4286	178	0	0.487671	young	4.01	6	6	3.97	FALSE	Yes	284	Bull Terrier - Staffordshire		2	Medium	M	2017-02-14	FALSE	FALSE
9708	6482	2017-08-10	5	25.2857	177	0	0.484932	young	4.15	5.39	6	4.26	FALSE	Yes	177	Retriever - Labrador		3	Large	F	2017-02-14	FALSE	FALSE
9709	6483	2017-08-10	80	349.143	2444	6	6.69589	middle-aged	3.46	3.99	4.52	2.01	FALSE	Yes	82	King Charles Spaniel - Cavalier		1	Small	F	2010-12-01	FALSE	TRUE
9697	6478	2017-08-08	10	44.5714	312	0	0.854795	young	3.82	6	6	3.23	FALSE	Yes	124	Bulldog - French		1	Small	F	2016-09-30	FALSE	FALSE
9681	5267	2017-08-05	64	281.714	1972	5	5.40274	middle-aged	3.26	5.33	4.77	3.67	FALSE	Yes	283	St Bernard		4	Extra Large	F	2012-03-12	FALSE	FALSE
9678	2895	2017-08-04	35	155.143	1086	2	2.97534	young	3.44	6	6	3.19	FALSE	Yes	163	Jack/Parson Russell Terrier		1	Small	M	2014-08-14	FALSE	FALSE
9672	5458	2017-08-03	81	354.143	2479	6	6.79178	middle-aged	3.53	6	5.72	4.09	FALSE	Yes	261	Shih Tzu		1	Small	F	2010-10-20	FALSE	FALSE
9676	6166	2017-08-03	5	24.1429	169	0	0.463014	young	4.09	6	6	2.52	FALSE	Yes	274	Spaniel - English Springer		2	Medium	F	2017-02-15	FALSE	FALSE
9671	6471	2017-08-02	19	85	595	1	1.63014	young	3.55	5.9	5.8	1.33	FALSE	Yes	177	Retriever - Labrador		3	Large	F	2015-12-16	FALSE	FALSE
9665	6470	2017-08-01	14	62.1429	435	1	1.19178	young	3.38	5.33	4.89	3.55	FALSE	Yes	38	Beagle		2	Medium	M	2016-05-23	FALSE	TRUE
9648	6459	2017-07-29	6	28.5714	200	0	0.547945	young	4.09	5.79	6	3.72	FALSE	Yes	177	Retriever - Labrador		3	Large	F	2017-01-10	FALSE	FALSE
9638	6081	2017-07-28	132	576.857	4038	11	11.063	old	3.23	5.39	5.56	4.09	TRUE	Yes	261	Shih Tzu		1	Small	M	2006-07-08	FALSE	FALSE
9639	6451	2017-07-28	57	250.857	1756	4	4.81096	middle-aged	3.89	6	5.9	3.39	FALSE	Yes	5	Mixed (Medium)		2	Medium	M	2012-10-06	FALSE	FALSE
9629	6443	2017-07-27	63	277.571	1943	5	5.32329	middle-aged	3.81	5.06	5.89	3.68	FALSE	Yes	245	Rhodesian Ridgeback		3	Large	F	2012-04-01	FALSE	FALSE
9632	6447	2017-07-27	98	426.857	2988	8	8.1863	old	3.89	6	5.9	4.26	TRUE	Yes	303	West Highland White Terrier		1	Small	F	2009-05-22	FALSE	TRUE
9633	6123	2017-07-27	8	36.1429	253	0	0.693151	young	3.53	5.33	5.67	3.1	FALSE	Yes	59	Border Collie		2	Medium	M	2016-11-16	FALSE	FALSE
9636	6449	2017-07-27	42	184.571	1292	3	3.53973	young	3.82	6	6	3.19	FALSE	Yes	6	Mixed (Large)		3	Large	M	2014-01-12	FALSE	FALSE
9618	6245	2017-07-26	4	20.2857	142	0	0.389041	young	3.59	5.8	5.8	4.26	FALSE	Yes	136	Retriever - Golden		3	Large	M	2017-03-06	FALSE	FALSE
9619	2659	2017-07-26	28	125.143	876	2	2.4	young	4.09	5.82	6	3.43	FALSE	Yes	225	Poodle (Standard)		3	Large	M	2015-03-03	FALSE	FALSE
9621	6438	2017-07-26	90	394.714	2763	7	7.56986	middle-aged	3.23	5.33	5.5	2.81	FALSE	Yes	177	Retriever - Labrador		3	Large	F	2010-01-01	FALSE	FALSE
9623	6439	2017-07-26	140	610.143	4271	11	11.7014	old	3.08	5.1	5.42	3.72	TRUE	Yes	163	Jack/Parson Russell Terrier		1	Small	M	2005-11-15	FALSE	FALSE
9627	4792	2017-07-26	64	278.571	1950	5	5.34247	middle-aged	4.15	6	6	3.03	FALSE	Yes	103	Dachshund (Standard)		2	Medium	M	2012-03-24	FALSE	FALSE
9611	6433	2017-07-25	20	90.2857	632	1	1.73151	young	3.91	4.83	4.48	4.26	FALSE	Yes	183	Lhasa Apso		1	Small	M	2015-11-01	FALSE	FALSE
9605	6108	2017-07-24	7	30.4286	213	0	0.583562	young	2.08	3.99	3.94	2.13	FALSE	Yes	177	Retriever - Labrador		3	Large	M	2016-12-23	FALSE	FALSE
9606	2681	2017-07-24	29	129.286	905	2	2.47945	young	4.15	5.44	5.36	4.26	FALSE	Yes	303	West Highland White Terrier		1	Small	F	2015-01-31	FALSE	FALSE
9608	6089	2017-07-24	5	24.1429	169	0	0.463014	young	4.15	6	6	4.26	FALSE	Yes	183	Lhasa Apso		1	Small	M	2017-02-05	FALSE	FALSE
9610	6124	2017-07-24	7	34.2857	240	0	0.657534	young	3.91	5.9	5.89	3.39	FALSE	Yes	274	Spaniel - English Springer		2	Medium	M	2016-11-26	FALSE	FALSE
9593	4314	2017-07-22	22	96.7143	677	1	1.85479	young	4.15	6	6	4.26	FALSE	Yes	101	Cross Breed (Unknown X )/ Mongrel		4	Extra Large	F	2015-09-14	FALSE	FALSE
9594	6427	2017-07-22	3	16.1429	113	0	0.309589	young	4.15	6	6	2.52	FALSE	Yes	6	Mixed (Large)		3	Large	M	2017-03-31	FALSE	FALSE
9597	4642	2017-07-22	85	372.571	2608	7	7.14521	middle-aged	4.15	6	6	4.26	FALSE	Yes	101	Cross Breed (Unknown X )/ Mongrel		4	Extra Large	F	2010-06-01	FALSE	FALSE
9598	4643	2017-07-22	73	320.429	2243	6	6.14521	middle-aged	4.15	6	6	4.26	FALSE	Yes	101	Cross Breed (Unknown X )/ Mongrel		4	Extra Large	M	2011-06-01	FALSE	FALSE
9568	6016	2017-07-18	14	61.8571	433	1	1.1863	young	4.15	6	6	4.26	FALSE	Yes	136	Retriever - Golden		3	Large	M	2016-05-11	FALSE	FALSE
9569	6015	2017-07-18	78	340.714	2385	6	6.53425	middle-aged	4.06	6	6	4.26	FALSE	Yes	136	Retriever - Golden		3	Large	F	2011-01-06	FALSE	FALSE
9571	4289	2017-07-18	109	476.143	3333	9	9.13151	old	2.39	5	3.79	1.51	TRUE	Yes	177	Retriever - Labrador		3	Large	F	2008-06-02	FALSE	TRUE
9562	6169	2017-07-16	87	379.571	2657	7	7.27945	middle-aged	3.57	6	6	4.26	FALSE	Yes	59	Border Collie		2	Medium	F	2010-04-07	FALSE	TRUE
9556	6414	2017-07-15	73	319.429	2236	6	6.12603	middle-aged	2.72	5.06	4.14	2.55	FALSE	Yes	144	Greyhound		3	Large	F	2011-06-01	FALSE	TRUE
9557	5938	2017-07-15	8	37.4286	262	0	0.717808	young	4.15	6	6	4.26	FALSE	Yes	96	Spaniel - English Cocker		2	Medium	F	2016-10-26	FALSE	FALSE
9545	6409	2017-07-14	25	111.143	778	2	2.13151	young	3.41	6	5.81	3.55	FALSE	Yes	182	Leonberger		4	Extra Large	F	2015-05-28	FALSE	FALSE
9540	6405	2017-07-12	44	191.571	1341	3	3.67397	young	3.73	5.82	5.2	1.83	FALSE	Yes	163	Jack/Parson Russell Terrier		1	Small	M	2013-11-09	FALSE	FALSE
9532	6400	2017-07-11	60	260.857	1826	5	5.00274	middle-aged	2.08	3.99	3.94	2.13	FALSE	Yes	177	Retriever - Labrador		3	Large	F	2012-07-11	FALSE	FALSE
9533	6401	2017-07-11	5	25.2857	177	0	0.484932	young	3.48	5.73	5.9	2.52	FALSE	Yes	309	Yorkshire Terrier		1	Small	M	2017-01-15	FALSE	FALSE
9536	6402	2017-07-11	26	114.143	799	2	2.18904	young	4.15	5.69	6	3.72	FALSE	Yes	199	Schnauzer (Miniature)		1	Small	F	2015-05-04	FALSE	FALSE
9526	4959	2017-07-10	17	74.8571	524	1	1.43562	young	3.14	4.98	5.9	2.85	FALSE	Yes	177	Retriever - Labrador		3	Large	F	2016-02-02	FALSE	FALSE
9519	6392	2017-07-09	83	363.286	2543	6	6.96712	middle-aged	3.4	5.24	5.31	3.01	FALSE	Yes	128	German Shepherd / Alsatian		3	Large	M	2010-07-23	FALSE	TRUE
9516	4795	2017-07-07	50	218.714	1531	4	4.19452	middle-aged	3.75	6	5.9	4.01	FALSE	Yes	96	Spaniel - English Cocker		2	Medium	F	2013-04-28	FALSE	FALSE
9513	5909	2017-07-05	87	379.857	2659	7	7.28493	middle-aged	4.15	6	6	4.26	FALSE	Yes	136	Retriever - Golden		3	Large	M	2010-03-25	FALSE	FALSE
9505	6382	2017-07-04	24	106.429	745	2	2.0411	young	4.09	4.92	4.48	4.26	FALSE	Yes	177	Retriever - Labrador		3	Large	M	2015-06-20	FALSE	FALSE
9506	6383	2017-07-04	24	106.286	744	2	2.03836	young	4.06	6	6	4.26	FALSE	Yes	177	Retriever - Labrador		3	Large	M	2015-06-21	FALSE	FALSE
9509	6386	2017-07-04	15	65.1429	456	1	1.24932	young	3.88	6	6	3.97	FALSE	Yes	259	Shetland / Sheltie Sheepdog		2	Medium	F	2016-04-04	FALSE	FALSE
9510	6387	2017-07-04	96	419.286	2935	8	8.0411	old	2.4	5.54	5.02	4.09	TRUE	Yes	176	Labradoodle (X Labrador/Poodle)		3	Large	M	2009-06-21	FALSE	FALSE
9501	6380	2017-07-03	4	18.1429	127	0	0.347945	young	3.77	5.42	6	2.52	FALSE	Yes	226	Poodle (Toy)		1	Small	M	2017-02-26	FALSE	FALSE
9502	1467	2017-07-03	51	224.714	1573	4	4.30959	middle-aged	4.15	6	6	4.26	FALSE	Yes	177	Retriever - Labrador		3	Large	F	2013-03-13	FALSE	FALSE
9491	6375	2017-07-02	78	339.143	2374	6	6.50411	middle-aged	3.69	6	5.8	4.26	FALSE	Yes	103	Dachshund (Standard)		2	Medium	M	2011-01-01	FALSE	FALSE
9492	6376	2017-07-02	58	252	1764	4	4.83288	middle-aged	4.15	6	6	4.26	FALSE	Yes	163	Jack/Parson Russell Terrier		1	Small	F	2012-09-02	FALSE	TRUE
9485	6371	2017-07-01	163	711.714	4982	13	13.6493	old	2.56	5.72	5.7	2.85	TRUE	Yes	309	Yorkshire Terrier		1	Small	F	2003-11-10	FALSE	FALSE
9477	5995	2017-06-30	10	45.5714	319	0	0.873973	young	4.15	6	6	4.26	FALSE	Yes	304	Whippet		2	Medium	M	2016-08-15	FALSE	FALSE
9480	5971	2017-06-30	63	277.143	1940	5	5.31507	middle-aged	2.63	5.45	5.51	2.81	FALSE	Yes	177	Retriever - Labrador		3	Large	M	2012-03-08	FALSE	TRUE
9464	6363	2017-06-29	30	133.143	932	2	2.55342	young	4.15	6	6	2.61	FALSE	Yes	163	Jack/Parson Russell Terrier		1	Small	F	2014-12-10	FALSE	FALSE
9465	4579	2017-06-29	17	74.1429	519	1	1.42192	young	4.15	6	6	4.26	FALSE	Yes	101	Cross Breed (Unknown X )/ Mongrel		4	Extra Large	M	2016-01-27	FALSE	FALSE
9473	3404	2017-06-29	34	149.857	1049	2	2.87397	young	4.15	6	6	3.68	FALSE	Yes	96	Spaniel - English Cocker		2	Medium	M	2014-08-15	FALSE	FALSE
9474	3405	2017-06-29	60	262.429	1837	5	5.03288	middle-aged	3.02	5.39	5.8	4.26	FALSE	Yes	96	Spaniel - English Cocker		2	Medium	M	2012-06-18	FALSE	TRUE
9458	5959	2017-06-28	17	76.7143	537	1	1.47123	young	4.15	5.91	5.38	3.91	FALSE	Yes	231	Pug		1	Small	M	2016-01-08	FALSE	FALSE
9454	3966	2017-06-27	30	131	917	2	2.51233	young	2.95	5.35	5.32	1.84	FALSE	Yes	177	Retriever - Labrador		3	Large	M	2014-12-23	FALSE	FALSE
9441	6349	2017-06-25	20	87	609	1	1.66849	young	3.26	4.98	5.36	1.57	FALSE	Yes	230	Portuguese Water Dog		3	Large	M	2015-10-25	FALSE	FALSE
9443	6350	2017-06-25	91	398.571	2790	7	7.64384	middle-aged	3.77	6	5.8	4.26	FALSE	Yes	309	Yorkshire Terrier		1	Small	F	2009-11-04	FALSE	FALSE
9439	4600	2017-06-24	72	314.286	2200	6	6.0274	middle-aged	3.25	5.55	5.7	2.11	FALSE	Yes	157	Irish Terrier		2	Medium	M	2011-06-16	FALSE	TRUE
9431	6345	2017-06-23	12	55.2857	387	1	1.06027	young	2.27	4.97	5.9	2.65	FALSE	Yes	11	Husky - Alaskan		3	Large	M	2016-06-01	FALSE	FALSE
9437	5983	2017-06-23	17	75.2857	527	1	1.44384	young	4.15	5.18	6	1.91	FALSE	Yes	186	Lurcher		3	Large	F	2016-01-13	FALSE	FALSE
9425	6115	2017-06-22	14	64.4286	451	1	1.23562	young	4.15	6	5.36	3.39	FALSE	Yes	101	Cross Breed (Unknown X )/ Mongrel		4	Extra Large	F	2016-03-28	FALSE	FALSE
9428	5389	2017-06-22	21	95.4286	668	1	1.83014	young	3.95	5.54	6	3.72	FALSE	Yes	38	Beagle		2	Medium	M	2015-08-24	FALSE	FALSE
9422	3877	2017-06-21	25	109.857	769	2	2.10685	young	3.68	6	5.9	3.43	FALSE	Yes	38	Beagle		2	Medium	F	2015-05-14	FALSE	FALSE
9424	6341	2017-06-21	6	28.1429	197	0	0.539726	young	3.64	6	5.9	4.26	FALSE	Yes	95	Cockapoo / Cockerpoo / Spoodle (X Spaniel/Poodle)		2	Medium	F	2016-12-06	FALSE	FALSE
9413	6335	2017-06-20	23	101.714	712	1	1.95068	young	4.07	6	6	2.94	FALSE	Yes	198	Pinscher (Miniature)		1	Small	M	2015-07-09	FALSE	FALSE
9400	5306	2017-06-18	104	454.571	3182	8	8.71781	old	2.98	4.63	5.22	1.77	TRUE	Yes	284	Bull Terrier - Staffordshire		2	Medium	M	2008-10-01	FALSE	FALSE
9402	6328	2017-06-18	12	56.2857	394	1	1.07945	young	3.62	3.76	3.92	2.52	FALSE	Yes	274	Spaniel - English Springer		2	Medium	M	2016-05-20	FALSE	FALSE
9392	6324	2017-06-16	7	33.2857	233	0	0.638356	young	3.36	6	5.51	3.8	FALSE	Yes	4	Mixed (Small)		1	Small	M	2016-10-26	FALSE	FALSE
9394	5556	2017-06-16	12	54.4286	381	1	1.04384	young	3.7	6	6	4.26	FALSE	Yes	309	Yorkshire Terrier		1	Small	M	2016-05-31	FALSE	FALSE
9386	6322	2017-06-15	30	131.143	918	2	2.51507	young	3.47	5.82	5.81	3.26	FALSE	Yes	38	Beagle		2	Medium	M	2014-12-10	FALSE	FALSE
9388	1896	2017-06-15	38	169.286	1185	3	3.24658	young	4.15	6	6	4.26	FALSE	Yes	96	Spaniel - English Cocker		2	Medium	F	2014-03-18	FALSE	FALSE
9389	6323	2017-06-15	146	634.857	4444	12	12.1753	old	2.35	4.94	4.07	3.42	TRUE	Yes	136	Retriever - Golden		3	Large	F	2005-04-15	FALSE	FALSE
9375	5756	2017-06-14	17	75.5714	529	1	1.44932	young	4.15	6	5.36	4.26	FALSE	Yes	96	Spaniel - English Cocker		2	Medium	F	2016-01-02	FALSE	TRUE
9376	3385	2017-06-14	37	163.857	1147	3	3.14247	young	4.15	6	6	4.26	FALSE	Yes	224	Poodle (Miniature)		2	Medium	F	2014-04-24	FALSE	TRUE
9365	6309	2017-06-13	13	57.5714	403	1	1.10411	young	4.15	6	6	4.26	FALSE	Yes	62	Boston Terrier		1	Small	F	2016-05-06	FALSE	TRUE
9369	6315	2017-06-13	36	160.429	1123	3	3.07671	young	2.91	4.73	4.86	2.86	FALSE	Yes	231	Pug		1	Small	M	2014-05-17	FALSE	FALSE
9372	5936	2017-06-13	146	639.143	4474	12	12.2575	old	2.54	4.86	4.05	3.2	TRUE	Yes	136	Retriever - Golden		3	Large	M	2005-03-14	FALSE	FALSE
9358	6307	2017-06-12	37	162.286	1136	3	3.11233	young	4.09	6	5.9	3.43	FALSE	Yes	5	Mixed (Medium)		2	Medium	M	2014-05-03	FALSE	FALSE
9360	5474	2017-06-12	71	310.429	2173	5	5.95342	middle-aged	2.71	4.98	5.33	1.74	FALSE	Yes	101	Cross Breed (Unknown X )/ Mongrel		4	Extra Large	F	2011-07-01	FALSE	FALSE
9361	5473	2017-06-12	22	97.2857	681	1	1.86575	young	3.58	5.64	5.81	3.84	FALSE	Yes	177	Retriever - Labrador		3	Large	M	2015-08-01	FALSE	FALSE
9362	2374	2017-06-12	58	255.429	1788	4	4.89863	middle-aged	2.43	3.99	4.15	2.13	FALSE	Yes	60	Border Terrier		1	Small	M	2012-07-20	FALSE	FALSE
9356	2266	2017-06-11	48	212.286	1486	4	4.07123	middle-aged	4.15	6	6	4.26	FALSE	Yes	303	West Highland White Terrier		1	Small	M	2013-05-17	FALSE	FALSE
9349	6304	2017-06-09	7	30.8571	216	0	0.591781	young	3.89	5.45	6	3.43	FALSE	Yes	124	Bulldog - French		1	Small	M	2016-11-05	FALSE	FALSE
9339	6299	2017-06-08	3	16.2857	114	0	0.312329	young	4.15	5.39	6	4.26	FALSE	Yes	304	Whippet		2	Medium	M	2017-02-14	FALSE	FALSE
9341	3200	2017-06-08	26	116.714	817	2	2.23836	young	2.16	3.99	3.94	2.13	FALSE	Yes	52	Bichon Frise		1	Small	M	2015-03-14	FALSE	FALSE
9342	6300	2017-06-08	18	80.7143	565	1	1.54795	young	3.1	6	5.89	3.68	FALSE	Yes	303	West Highland White Terrier		1	Small	M	2015-11-21	FALSE	FALSE
9343	6301	2017-06-08	57	248.714	1741	4	4.76986	middle-aged	3.93	6	5.47	3.19	FALSE	Yes	59	Border Collie		2	Medium	M	2012-09-01	FALSE	FALSE
9326	4194	2017-06-07	17	78.1429	547	1	1.49863	young	4.07	4.15	5.24	4.26	FALSE	Yes	303	West Highland White Terrier		1	Small	M	2015-12-08	FALSE	FALSE
9327	6295	2017-06-07	20	88.5714	620	1	1.69863	young	4.15	5.39	6	3.72	FALSE	Yes	272	Soft Coated Wheaten Terrier		2	Medium	M	2015-09-26	FALSE	FALSE
9328	2394	2017-06-07	52	229	1603	4	4.39178	middle-aged	3.41	5.65	5.9	3.68	FALSE	Yes	215	Patterdale Terrier		1	Small	F	2013-01-16	FALSE	FALSE
9331	6297	2017-06-07	20	88.5714	620	1	1.69863	young	4.15	6	6	4.26	FALSE	Yes	272	Soft Coated Wheaten Terrier		2	Medium	M	2015-09-26	FALSE	FALSE
9317	6288	2017-06-05	23	100.714	705	1	1.93151	young	4.09	5.39	6	4.26	FALSE	Yes	177	Retriever - Labrador		3	Large	M	2015-07-01	FALSE	FALSE
9306	5233	2017-06-02	49	217.286	1521	4	4.16712	middle-aged	4.15	5.72	6	4.26	FALSE	Yes	82	King Charles Spaniel - Cavalier		1	Small	F	2013-04-03	FALSE	FALSE
9300	6280	2017-06-01	120	521.857	3653	10	10.0082	old	2.06	5.09	4.21	4.26	TRUE	Yes	176	Labradoodle (X Labrador/Poodle)		3	Large	M	2007-06-01	FALSE	FALSE
9301	6281	2017-06-01	120	521.857	3653	10	10.0082	old	2.46	4.71	3.2	3.39	TRUE	Yes	176	Labradoodle (X Labrador/Poodle)		3	Large	M	2007-06-01	FALSE	FALSE
9302	6282	2017-06-01	13	56.5714	396	1	1.08493	young	3.25	5.22	4.51	1.88	FALSE	Yes	42	Bedlington Terrier		2	Medium	M	2016-05-01	FALSE	FALSE
9290	4708	2017-05-31	128	558.286	3908	10	10.7068	old	3.35	5.45	5.8	4.26	TRUE	Yes	52	Bichon Frise		1	Small	F	2006-09-18	FALSE	FALSE
9293	6277	2017-05-31	38	167.571	1173	3	3.2137	young	3.99	6	6	4.26	FALSE	Yes	231	Pug		1	Small	F	2014-03-15	FALSE	FALSE
9294	6278	2017-05-31	91	398.286	2788	7	7.63836	middle-aged	2.51	4.64	4.8	2.84	TRUE	Yes	226	Poodle (Toy)		1	Small	M	2009-10-12	FALSE	FALSE
9280	6273	2017-05-30	163	712.857	4990	13	13.6712	old	3.92	5.72	5.46	3.55	TRUE	Yes	177	Retriever - Labrador		3	Large	F	2003-10-01	FALSE	FALSE
9275	6271	2017-05-29	7	30.5714	214	0	0.586301	young	3.94	6	5.57	3.97	FALSE	Yes	38	Beagle		2	Medium	M	2016-10-27	FALSE	TRUE
9257	4015	2017-05-28	55	241.714	1692	4	4.63562	middle-aged	2.99	5.53	5.67	3.55	FALSE	Yes	255	Scottish Terrier		2	Medium	M	2012-10-09	FALSE	TRUE
9262	5565	2017-05-28	7	34.1429	239	0	0.654795	young	4.15	6	6	3.39	FALSE	Yes	4	Mixed (Small)		1	Small	M	2016-10-01	FALSE	FALSE
9263	5450	2017-05-28	10	46.8571	328	0	0.89863	young	4.15	6	4.24	3.74	FALSE	Yes	95	Cockapoo / Cockerpoo / Spoodle (X Spaniel/Poodle)		2	Medium	F	2016-07-04	FALSE	FALSE
9264	6270	2017-05-28	106	461.714	3232	8	8.85479	old	3.6	5.03	5.8	4.26	TRUE	Yes	60	Border Terrier		1	Small	M	2008-07-22	FALSE	FALSE
9253	6267	2017-05-27	33	143.571	1005	2	2.75342	young	3.92	5.39	5.26	2.56	FALSE	Yes	163	Jack/Parson Russell Terrier		1	Small	M	2014-08-26	FALSE	FALSE
9247	5703	2017-05-26	136	593	4151	11	11.3726	old	1.39	5.14	4.5	2.96	TRUE	Yes	98	Collie - Rough Coat		2	Medium	M	2006-01-13	FALSE	FALSE
9237	6258	2017-05-24	10	46.4286	325	0	0.890411	young	3.71	5.4	5.37	3.22	FALSE	Yes	36	Basset Hound		3	Large	M	2016-07-03	FALSE	FALSE
9233	6255	2017-05-23	108	469.571	3287	9	9.00548	old	3.16	5.22	4.47	4.09	TRUE	Yes	177	Retriever - Labrador		3	Large	F	2008-05-23	FALSE	FALSE
9234	6256	2017-05-23	132	574	4018	11	11.0082	old	3.33	5.73	5.2	3.38	TRUE	Yes	101	Cross Breed (Unknown X )/ Mongrel		4	Extra Large	F	2006-05-23	FALSE	FALSE
9215	6249	2017-05-20	30	131.286	919	2	2.51781	young	4.15	5.9	4.68	1.32	FALSE	Yes	177	Retriever - Labrador		3	Large	M	2014-11-13	FALSE	FALSE
9204	3525	2017-05-19	78	339.857	2379	6	6.51781	middle-aged	4.09	6	6	4.26	FALSE	qol.transition_question.answer.yes	177	Retriever - Labrador		3	Large	M	2010-11-13	FALSE	FALSE
9205	6246	2017-05-19	81	356.286	2494	6	6.83288	middle-aged	2.08	3.99	3.94	2.13	FALSE	Yes	60	Border Terrier		1	Small	F	2010-07-21	FALSE	FALSE
9206	6247	2017-05-19	17	76.4286	535	1	1.46575	young	4.15	6	5.36	1.03	FALSE	Yes	284	Bull Terrier - Staffordshire		2	Medium	F	2015-12-01	FALSE	FALSE
9210	3871	2017-05-19	21	91.4286	640	1	1.75342	young	4.09	6	6	3.72	FALSE	Yes	251	Schipperke		1	Small	M	2015-08-18	FALSE	FALSE
9194	6240	2017-05-18	38	168.286	1178	3	3.2274	young	3.83	5.91	5.89	3.97	FALSE	Yes	101	Cross Breed (Unknown X )/ Mongrel		4	Extra Large	M	2014-02-25	FALSE	FALSE
9195	4621	2017-05-18	31	135.429	948	2	2.59726	young	3.99	6	6	4.26	FALSE	Yes	163	Jack/Parson Russell Terrier		1	Small	F	2014-10-13	FALSE	FALSE
9198	5630	2017-05-18	145	632.286	4426	12	12.126	old	2.21	4.39	3.94	3.2	TRUE	Yes	136	Retriever - Golden		3	Large	F	2005-04-05	FALSE	FALSE
9187	3635	2017-05-17	20	89.7143	628	1	1.72055	young	4.15	6	5.32	2.64	FALSE	Yes	309	Yorkshire Terrier		1	Small	F	2015-08-28	FALSE	FALSE
9188	6234	2017-05-17	47	205.857	1441	3	3.94795	young	3.97	5.72	5.18	2.85	FALSE	Yes	24	Australian Kelpie Sheep Dog		2	Medium	M	2013-06-06	FALSE	FALSE
9191	6237	2017-05-17	82	356.857	2498	6	6.84384	middle-aged	2.63	4.56	4.45	3.33	FALSE	Yes	176	Labradoodle (X Labrador/Poodle)		3	Large	F	2010-07-15	FALSE	FALSE
9179	6233	2017-05-16	35	152.143	1065	2	2.91781	young	4.15	5.91	5.53	3.68	FALSE	Yes	95	Cockapoo / Cockerpoo / Spoodle (X Spaniel/Poodle)		2	Medium	M	2014-06-16	FALSE	FALSE
9182	5515	2017-05-16	56	244.857	1714	4	4.69589	middle-aged	3.67	6	6	4.26	FALSE	Yes	163	Jack/Parson Russell Terrier		1	Small	M	2012-09-05	FALSE	FALSE
9183	5516	2017-05-16	56	244.857	1714	4	4.69589	middle-aged	4.15	6	6	4.26	FALSE	Yes	163	Jack/Parson Russell Terrier		1	Small	M	2012-09-05	FALSE	FALSE
9186	5596	2017-05-16	20	88.5714	620	1	1.69863	young	4.15	6	6	4.26	FALSE	Yes	261	Shih Tzu		1	Small	M	2015-09-04	FALSE	FALSE
9168	6225	2017-05-15	118	515.429	3608	9	9.88493	old	3.23	5.03	5.17	2.44	TRUE	Yes	274	Spaniel - English Springer		2	Medium	F	2007-06-29	FALSE	FALSE
9175	6228	2017-05-15	9	41.1429	288	0	0.789041	young	3.93	6	5.9	3.97	FALSE	Yes	124	Bulldog - French		1	Small	F	2016-07-31	FALSE	FALSE
9164	2029	2017-05-14	31	134.714	943	2	2.58356	young	3.74	6	6	4.26	FALSE	Yes	274	Spaniel - English Springer		2	Medium	M	2014-10-14	FALSE	FALSE
9154	1775	2017-05-13	43	189.857	1329	3	3.6411	young	3.98	4.93	6	2.65	FALSE	Yes	177	Retriever - Labrador		3	Large	M	2013-09-22	FALSE	FALSE
9155	5239	2017-05-13	9	43.2857	303	0	0.830137	young	3.69	5.91	5.8	3.97	FALSE	Yes	101	Cross Breed (Unknown X )/ Mongrel		4	Extra Large	F	2016-07-14	FALSE	FALSE
9157	6220	2017-05-13	14	61	427	1	1.16986	young	3.03	5.35	5.37	1.57	FALSE	Yes	303	West Highland White Terrier		1	Small	F	2016-03-12	FALSE	TRUE
9146	6215	2017-05-12	6	27.1429	190	0	0.520548	young	4.15	6	6	4.26	FALSE	Yes	4	Mixed (Small)		1	Small	F	2016-11-03	FALSE	FALSE
9147	6216	2017-05-12	3	16.8571	118	0	0.323288	young	3.85	5.81	5.91	3.26	FALSE	Yes	103	Dachshund (Standard)		2	Medium	M	2017-01-14	FALSE	FALSE
9149	4743	2017-05-12	12	55.5714	389	1	1.06575	young	4.09	5.39	6	3.39	FALSE	Yes	4	Mixed (Small)		1	Small	F	2016-04-18	FALSE	FALSE
9151	4913	2017-05-12	9	40.4286	283	0	0.775342	young	2.08	3.99	3.94	2.13	FALSE	Yes	101	Cross Breed (Unknown X )/ Mongrel		4	Extra Large	F	2016-08-02	FALSE	FALSE
9152	6218	2017-05-12	106	460.857	3226	8	8.83836	old	3.6	5.15	3.78	3.03	TRUE	Yes	104	Dalmation		3	Large	F	2008-07-12	FALSE	FALSE
9128	6199	2017-05-09	64	279.286	1955	5	5.35616	middle-aged	3.74	5.41	5.47	1.52	FALSE	Yes	177	Retriever - Labrador		3	Large	M	2012-01-01	FALSE	FALSE
9131	4710	2017-05-09	80	348	2436	6	6.67397	middle-aged	3.37	5.3	5.21	4.26	FALSE	Yes	6	Mixed (Large)		3	Large	M	2010-09-07	FALSE	FALSE
9121	6195	2017-05-08	89	388.286	2718	7	7.44658	middle-aged	4.15	6	6	4.26	TRUE	Yes	5	Mixed (Medium)		2	Medium	M	2009-11-28	FALSE	FALSE
9123	5005	2017-05-08	57	250.571	1754	4	4.80548	middle-aged	3.53	5.54	5.43	1.94	FALSE	Yes	177	Retriever - Labrador		3	Large	M	2012-07-19	FALSE	TRUE
9111	6194	2017-05-07	5	24.7143	173	0	0.473973	young	4.15	6	6	4.26	FALSE	Yes	101	Cross Breed (Unknown X )/ Mongrel		4	Extra Large	M	2016-11-15	FALSE	FALSE
9114	4386	2017-05-07	36	157.429	1102	3	3.01918	young	3.54	5.81	5.81	3.3	FALSE	Yes	177	Retriever - Labrador		3	Large	M	2014-05-01	FALSE	FALSE
9102	6192	2017-05-06	60	261.286	1829	5	5.01096	middle-aged	2.59	5.46	5.7	3.52	FALSE	Yes	124	Bulldog - French		1	Small	F	2012-05-03	FALSE	FALSE
9093	6184	2017-05-05	7	32.4286	227	0	0.621918	young	4.15	6	6	4.26	FALSE	Yes	163	Jack/Parson Russell Terrier		1	Small	M	2016-09-20	FALSE	FALSE
9094	5617	2017-05-05	162	707.143	4950	13	13.5616	old	2.96	4.82	4.04	3.67	TRUE	Yes	177	Retriever - Labrador		3	Large	F	2003-10-16	FALSE	FALSE
9095	6186	2017-05-05	144	627	4389	12	12.0247	old	3.46	5.13	3.53	3.91	TRUE	Yes	136	Retriever - Golden		3	Large	M	2005-04-29	FALSE	TRUE
9097	6188	2017-05-05	17	77.1429	540	1	1.47945	young	4.15	6	5.36	2.52	FALSE	Yes	284	Bull Terrier - Staffordshire		2	Medium	F	2015-11-12	FALSE	FALSE
9088	6182	2017-05-04	124	542	3794	10	10.3945	old	3.29	5.15	4.15	3.59	TRUE	Yes	6	Mixed (Large)		3	Large	F	2006-12-14	FALSE	FALSE
9091	6183	2017-05-04	17	74.4286	521	1	1.4274	young	3.71	6	5.8	3.97	FALSE	Yes	1	Other (Small)		1	Small	M	2015-11-30	FALSE	FALSE
9076	5358	2017-05-02	74	323.714	2266	6	6.20822	middle-aged	2.71	5.82	5.51	3.43	FALSE	Yes	96	Spaniel - English Cocker		2	Medium	F	2011-02-17	FALSE	FALSE
9080	4967	2017-05-02	29	129.143	904	2	2.47671	young	4.07	5.9	6	3.72	FALSE	Yes	95	Cockapoo / Cockerpoo / Spoodle (X Spaniel/Poodle)		2	Medium	M	2014-11-10	FALSE	TRUE
9067	6170	2017-05-01	9	39.2857	275	0	0.753425	young	3.87	6	5.81	4.09	FALSE	Yes	226	Poodle (Toy)		1	Small	F	2016-07-30	FALSE	FALSE
9070	6173	2017-05-01	42	183	1281	3	3.50959	young	4.01	6	6	4.26	FALSE	Yes	261	Shih Tzu		1	Small	F	2013-10-28	FALSE	TRUE
9062	5451	2017-04-30	88	382.571	2678	7	7.33699	middle-aged	3.75	6	6	4.26	TRUE	Yes	136	Retriever - Golden		3	Large	F	2009-12-30	FALSE	FALSE
9049	6164	2017-04-28	6	29.2857	205	0	0.561644	young	3.72	6	6	4.26	FALSE	Yes	261	Shih Tzu		1	Small	M	2016-10-05	FALSE	FALSE
9050	5520	2017-04-28	10	43.7143	306	0	0.838356	young	3.63	5.1	5.37	3.43	FALSE	Yes	96	Spaniel - English Cocker		2	Medium	M	2016-06-26	FALSE	FALSE
9038	4912	2017-04-27	93	405.286	2837	7	7.7726	middle-aged	3.93	6	5.9	3.72	TRUE	Yes	177	Retriever - Labrador		3	Large	F	2009-07-21	FALSE	FALSE
9039	3929	2017-04-27	89	387	2709	7	7.42192	middle-aged	4.15	5.37	6	3.97	TRUE	Yes	4	Mixed (Small)		1	Small	F	2009-11-26	FALSE	FALSE
9029	6139	2017-04-26	34	149.143	1044	2	2.86027	young	3.91	5.82	6	3.48	FALSE	Yes	274	Spaniel - English Springer		2	Medium	F	2014-06-17	FALSE	FALSE
9031	6140	2017-04-26	64	281.857	1973	5	5.40548	middle-aged	3.66	5.85	6	2.65	FALSE	Yes	1	Other (Small)		1	Small	F	2011-12-01	FALSE	FALSE
9035	5604	2017-04-26	7	32.7143	229	0	0.627397	young	4.15	6	6	4.26	FALSE	Yes	95	Cockapoo / Cockerpoo / Spoodle (X Spaniel/Poodle)		2	Medium	F	2016-09-09	FALSE	FALSE
9023	5551	2017-04-25	90	394.714	2763	7	7.56986	middle-aged	3.67	6	5.81	3.8	TRUE	Yes	59	Border Collie		2	Medium	F	2009-10-01	FALSE	FALSE
9020	6131	2017-04-24	130	566.571	3966	10	10.8658	old	2.57	4.99	3.98	3.39	TRUE	Yes	177	Retriever - Labrador		3	Large	M	2006-06-15	FALSE	FALSE
9021	6132	2017-04-24	6	29.1429	204	0	0.558904	young	4.15	6	6	2.52	FALSE	Yes	103	Dachshund (Standard)		2	Medium	F	2016-10-02	FALSE	FALSE
9006	2869	2017-04-23	43	187.143	1310	3	3.58904	young	4.01	6	6	3.97	FALSE	Yes	177	Retriever - Labrador		3	Large	F	2013-09-21	FALSE	TRUE
8993	6120	2017-04-22	20	90	630	1	1.72603	young	3.88	5.51	5.59	2.48	FALSE	Yes	215	Patterdale Terrier		1	Small	M	2015-08-01	FALSE	FALSE
8995	6122	2017-04-22	25	111	777	2	2.12877	young	3.67	5.72	5.47	3.22	FALSE	Yes	95	Cockapoo / Cockerpoo / Spoodle (X Spaniel/Poodle)		2	Medium	M	2015-03-07	FALSE	TRUE
8983	6117	2017-04-20	8	36.4286	255	0	0.69863	young	3.88	6	5.51	3.26	FALSE	Yes	177	Retriever - Labrador		3	Large	M	2016-08-08	FALSE	FALSE
8965	6105	2017-04-18	12	54	378	1	1.03562	young	3.87	5.9	4.55	2.97	FALSE	Yes	177	Retriever - Labrador		3	Large	M	2016-04-05	FALSE	TRUE
8966	5579	2017-04-18	115	503.286	3523	9	9.65205	old	3.42	5.56	5.19	2.81	TRUE	Yes	274	Spaniel - English Springer		2	Medium	M	2007-08-26	FALSE	FALSE
8969	5472	2017-04-18	21	92.2857	646	1	1.76986	young	3.57	5.9	5.91	3.84	FALSE	Yes	182	Leonberger		4	Extra Large	M	2015-07-12	FALSE	FALSE
8970	4543	2017-04-18	113	495	3465	9	9.49315	old	4.15	6	6	4.26	TRUE	Yes	177	Retriever - Labrador		3	Large	F	2007-10-23	FALSE	FALSE
8971	5610	2017-04-18	105	457.429	3202	8	8.7726	old	3.15	4.96	4.11	2.84	TRUE	Yes	104	Dalmation		3	Large	F	2008-07-12	FALSE	FALSE
8972	4121	2017-04-18	62	272.143	1905	5	5.21918	middle-aged	3.95	5.82	6	4.26	FALSE	Yes	40	Bearded Collie		3	Large	F	2012-01-30	FALSE	FALSE
8974	6109	2017-04-18	77	339	2373	6	6.50137	middle-aged	2.72	5.63	5.58	4.26	FALSE	Yes	5	Mixed (Medium)		2	Medium	M	2010-10-19	FALSE	FALSE
8956	6100	2017-04-17	53	232.714	1629	4	4.46301	middle-aged	2.92	5.73	5.78	3.52	FALSE	Yes	140	Great Dane		4	Extra Large	F	2012-10-31	FALSE	TRUE
8957	5304	2017-04-17	12	53.8571	377	1	1.03288	young	3.1	5.31	5.58	2.94	FALSE	Yes	189	Maltese		1	Small	M	2016-04-05	FALSE	TRUE
8958	6101	2017-04-17	157	685	4795	13	13.137	old	2.95	5.91	5.7	2.36	TRUE	Yes	59	Border Collie		2	Medium	M	2004-03-01	FALSE	FALSE
8934	2765	2017-04-15	41	181.714	1272	3	3.48493	young	3.62	6	6	4.26	FALSE	Yes	96	Spaniel - English Cocker		2	Medium	F	2013-10-21	FALSE	TRUE
8935	2117	2017-04-15	28	124.571	872	2	2.38904	young	3.93	5.81	5.47	3.14	FALSE	Yes	74	Cairn Terrier		1	Small	F	2014-11-25	FALSE	FALSE
8936	6083	2017-04-15	80	349.857	2449	6	6.70959	middle-aged	3.95	6	6	2.98	FALSE	Yes	59	Border Collie		2	Medium	M	2010-08-01	FALSE	FALSE
8937	6084	2017-04-15	44	194.714	1363	3	3.73425	young	4.09	6	6	4.26	FALSE	Yes	176	Labradoodle (X Labrador/Poodle)		3	Large	M	2013-07-22	FALSE	FALSE
8939	5628	2017-04-15	5	23.5714	165	0	0.452055	young	3.71	6	5.8	2.49	FALSE	Yes	274	Spaniel - English Springer		2	Medium	M	2016-11-01	FALSE	FALSE
8940	4930	2017-04-15	76	331.714	2322	6	6.36164	middle-aged	4.15	6	6	4.26	FALSE	Yes	309	Yorkshire Terrier		1	Small	M	2010-12-06	FALSE	FALSE
8931	6080	2017-04-14	11	48.1429	337	0	0.923288	young	3.96	6	6	3.43	FALSE	Yes	177	Retriever - Labrador		3	Large	F	2016-05-12	FALSE	FALSE
8918	6076	2017-04-13	4	19.7143	138	0	0.378082	young	4.03	6	6	4.26	FALSE	Yes	265	Husky - Siberian		3	Large	F	2016-11-26	FALSE	FALSE
8920	4756	2017-04-13	53	234.429	1641	4	4.49589	middle-aged	4.15	6	6	4.26	FALSE	Yes	1	Other (Small)		1	Small	F	2012-10-15	FALSE	FALSE
8921	6077	2017-04-13	18	78.7143	551	1	1.50959	young	4.15	6	6	3.72	FALSE	Yes	177	Retriever - Labrador		3	Large	F	2015-10-10	FALSE	FALSE
8922	6078	2017-04-13	35	152.571	1068	2	2.92603	young	3.81	6	6	3.72	FALSE	Yes	163	Jack/Parson Russell Terrier		1	Small	F	2014-05-11	FALSE	FALSE
8923	6079	2017-04-13	88	384.286	2690	7	7.36986	middle-aged	3.85	5.7	5.9	4.01	TRUE	Yes	274	Spaniel - English Springer		2	Medium	F	2009-12-01	FALSE	FALSE
8911	6063	2017-04-11	84	365.286	2557	7	7.00548	middle-aged	3.85	6	5.81	3.55	FALSE	Yes	59	Border Collie		2	Medium	F	2010-04-11	FALSE	FALSE
8897	6053	2017-04-09	54	235.714	1650	4	4.52055	middle-aged	3.99	6	6	4.26	FALSE	Yes	177	Retriever - Labrador		3	Large	F	2012-10-02	FALSE	FALSE
8898	6054	2017-04-09	15	66	462	1	1.26575	young	4.09	5.39	5.9	2.36	FALSE	Yes	95	Cockapoo / Cockerpoo / Spoodle (X Spaniel/Poodle)		2	Medium	M	2016-01-03	FALSE	FALSE
8899	6055	2017-04-09	7	31.5714	221	0	0.605479	young	3.86	6	6	3.68	FALSE	Yes	232	Puggle (X Pug/ Beagle)		1	Small	F	2016-08-31	FALSE	FALSE
8900	6056	2017-04-09	8	35.8571	251	0	0.687671	young	2.98	5.91	5.8	3.97	FALSE	Yes	103	Dachshund (Standard)		2	Medium	F	2016-08-01	FALSE	FALSE
8902	6058	2017-04-09	15	67.1429	470	1	1.28767	young	4.15	6	6	2.65	FALSE	Yes	96	Spaniel - English Cocker		2	Medium	F	2015-12-26	FALSE	FALSE
8876	5225	2017-04-06	153	668.286	4678	12	12.8164	old	3.64	5.39	5.26	2.78	TRUE	Yes	96	Spaniel - English Cocker		2	Medium	F	2004-06-15	FALSE	FALSE
8877	5004	2017-04-06	11	48.4286	339	0	0.928767	young	4.15	6	6	4.26	FALSE	Yes	96	Spaniel - English Cocker		2	Medium	M	2016-05-02	FALSE	FALSE
8878	5224	2017-04-06	150	655.714	4590	12	12.5753	old	3.88	6	6	4.26	TRUE	Yes	96	Spaniel - English Cocker		2	Medium	M	2004-09-11	FALSE	FALSE
8879	5255	2017-04-06	15	65.8571	461	1	1.26301	young	4.06	6	6	4.26	FALSE	Yes	5	Mixed (Medium)		2	Medium	F	2016-01-01	FALSE	FALSE
8851	2047	2017-04-03	86	376	2632	7	7.21096	middle-aged	2.54	4.77	4.35	2.78	FALSE	Yes	177	Retriever - Labrador		3	Large	M	2010-01-18	FALSE	FALSE
8849	6026	2017-04-02	20	88.4286	619	1	1.69589	young	4.02	5.3	5.9	3.43	FALSE	Yes	38	Beagle		2	Medium	M	2015-07-23	FALSE	FALSE
8850	2788	2017-04-02	40	176.143	1233	3	3.37808	young	3.9	6	6	4.26	FALSE	Yes	136	Retriever - Golden		3	Large	M	2013-11-16	FALSE	TRUE
8843	5553	2017-04-01	71	310.571	2174	5	5.95616	middle-aged	3.88	5.44	5.36	3.97	FALSE	Yes	186	Lurcher		3	Large	F	2011-04-19	FALSE	FALSE
8839	6019	2017-03-31	78	340.714	2385	6	6.53425	middle-aged	4.15	6	6	3.19	FALSE	Yes	60	Border Terrier		1	Small	M	2010-09-19	FALSE	FALSE
8840	6020	2017-03-31	173	752.714	5269	14	14.4356	old	3.77	6	5.58	4.09	TRUE	Yes	60	Border Terrier		1	Small	F	2002-10-27	FALSE	FALSE
8836	6018	2017-03-30	11	51	357	0	0.978082	young	4.15	6	6	3.43	FALSE	Yes	52	Bichon Frise		1	Small	F	2016-04-07	FALSE	FALSE
8819	6010	2017-03-28	84	365.286	2557	7	7.00548	middle-aged	3.28	6	5.8	2.85	FALSE	Yes	136	Retriever - Golden		3	Large	F	2010-03-28	FALSE	FALSE
8823	6011	2017-03-28	5	23.5714	165	0	0.452055	young	4	5.72	5.57	4.01	FALSE	Yes	246	Rottweiler		3	Large	F	2016-10-14	FALSE	FALSE
8815	6005	2017-03-27	31	138	966	2	2.64658	young	2.76	5.36	4.87	3.55	FALSE	Yes	177	Retriever - Labrador		3	Large	M	2014-08-04	FALSE	FALSE
8809	5999	2017-03-26	123	537.143	3760	10	10.3014	old	3.11	5.07	4.02	3.74	TRUE	Yes	284	Bull Terrier - Staffordshire		2	Medium	F	2006-12-09	FALSE	FALSE
8811	5138	2017-03-26	102	443.857	3107	8	8.51233	old	4.09	6	6	4.26	TRUE	Yes	163	Jack/Parson Russell Terrier		1	Small	F	2008-09-22	FALSE	FALSE
8806	5997	2017-03-25	19	84.7143	593	1	1.62466	young	3.35	1.98	3.14	3.91	FALSE	Yes	136	Retriever - Golden		3	Large	F	2015-08-10	FALSE	FALSE
8798	5320	2017-03-24	70	305.714	2140	5	5.86301	middle-aged	3.38	5.64	5.52	2.72	FALSE	Yes	6	Mixed (Large)		3	Large	M	2011-05-15	FALSE	FALSE
8799	5993	2017-03-24	81	352.571	2468	6	6.76164	middle-aged	4.15	5.69	5.68	1.19	FALSE	Yes	163	Jack/Parson Russell Terrier		1	Small	M	2010-06-21	FALSE	TRUE
8793	5987	2017-03-23	26	117.143	820	2	2.24658	young	3.74	5.37	5.9	4.26	FALSE	Yes	261	Shih Tzu		1	Small	M	2014-12-24	FALSE	TRUE
8782	5976	2017-03-22	12	54.5714	382	1	1.04658	young	4.09	5.72	5.77	3.14	FALSE	Yes	96	Spaniel - English Cocker		2	Medium	M	2016-03-05	FALSE	FALSE
8783	5694	2017-03-22	97	423.571	2965	8	8.12329	old	3.75	5.91	5.52	3.72	TRUE	Yes	5	Mixed (Medium)		2	Medium	F	2009-02-07	FALSE	FALSE
8788	5981	2017-03-22	28	124.143	869	2	2.38082	young	4.03	6	6	3.97	FALSE	Yes	40	Bearded Collie		3	Large	M	2014-11-04	FALSE	FALSE
8790	5984	2017-03-22	18	80.4286	563	1	1.54247	young	3.85	6	5.7	3.97	FALSE	Yes	211	Old English Sheepdog		3	Large	M	2015-09-06	FALSE	FALSE
8775	3015	2017-03-21	63	275.857	1931	5	5.29041	middle-aged	3.59	5.7	5.91	2.14	FALSE	Yes	284	Bull Terrier - Staffordshire		2	Medium	F	2011-12-07	FALSE	TRUE
8771	5972	2017-03-20	4	17.2857	121	0	0.331507	young	3.96	6	6	4.26	FALSE	Yes	204	Newfoundland		4	Extra Large	F	2016-11-19	FALSE	FALSE
8761	3642	2017-03-19	24	105	735	2	2.0137	young	3.91	6	6	4.26	FALSE	Yes	229	Portuguese Pointer		2	Medium	M	2015-03-15	FALSE	FALSE
8762	5969	2017-03-19	62	273	1911	5	5.23562	middle-aged	2.64	4.49	5.13	1.91	FALSE	Yes	183	Lhasa Apso		1	Small	F	2011-12-25	FALSE	FALSE
8753	5961	2017-03-18	6	28.1429	197	0	0.539726	young	4.15	6	6	4.26	FALSE	Yes	177	Retriever - Labrador		3	Large	M	2016-09-02	FALSE	FALSE
8756	5963	2017-03-18	22	97.5714	683	1	1.87123	young	3.33	5.13	5.8	2.45	FALSE	Yes	304	Whippet		2	Medium	F	2015-05-05	FALSE	FALSE
8757	4986	2017-03-18	14	62.1429	435	1	1.19178	young	2.99	4.74	5.72	3.26	FALSE	Yes	103	Dachshund (Standard)		2	Medium	F	2016-01-08	FALSE	FALSE
8743	5386	2017-03-17	88	384.714	2693	7	7.37808	middle-aged	3.86	6	5.78	4.26	TRUE	Yes	59	Border Collie		2	Medium	F	2009-11-01	FALSE	FALSE
8744	5413	2017-03-17	136	592.571	4148	11	11.3644	old	2.37	4.35	3.94	2.96	TRUE	Yes	128	German Shepherd / Alsatian		3	Large	M	2005-11-07	FALSE	FALSE
8726	5948	2017-03-16	89	389	2723	7	7.46027	middle-aged	3.96	6	6	2.65	TRUE	Yes	5	Mixed (Medium)		2	Medium	M	2009-10-01	FALSE	FALSE
8727	5949	2017-03-16	89	389	2723	7	7.46027	middle-aged	3.78	6	5.27	3.22	TRUE	Yes	6	Mixed (Large)		3	Large	F	2009-10-01	FALSE	FALSE
8732	5951	2017-03-16	43	189.714	1328	3	3.63836	young	3.77	5.39	5.9	4.26	FALSE	Yes	136	Retriever - Golden		3	Large	M	2013-07-27	FALSE	FALSE
8733	5952	2017-03-16	18	81.5714	571	1	1.56438	young	4.15	6	6	4.26	FALSE	Yes	136	Retriever - Golden		3	Large	M	2015-08-23	FALSE	FALSE
8712	3558	2017-03-15	31	134.714	943	2	2.58356	young	4.15	6	5.28	4.26	FALSE	Yes	136	Retriever - Golden		3	Large	F	2014-08-15	FALSE	FALSE
8713	3559	2017-03-15	110	479.143	3354	9	9.18904	old	4.07	6	5.41	4.09	TRUE	Yes	136	Retriever - Golden		3	Large	F	2008-01-08	FALSE	FALSE
8718	5945	2017-03-15	21	91.5714	641	1	1.75616	young	3.55	5.49	5.26	1.45	FALSE	Yes	231	Pug		1	Small	M	2015-06-13	FALSE	FALSE
8719	5947	2017-03-15	84	365.571	2559	7	7.01096	middle-aged	3.11	5.33	5.22	3.55	FALSE	Yes	163	Jack/Parson Russell Terrier		1	Small	M	2010-03-13	FALSE	FALSE
8724	4206	2017-03-15	13	60.5714	424	1	1.16164	young	3.95	6	5.9	4.26	FALSE	Yes	163	Jack/Parson Russell Terrier		1	Small	F	2016-01-16	FALSE	FALSE
8690	5925	2017-03-13	88	384.143	2689	7	7.36712	middle-aged	3.92	5.9	5.41	4.09	TRUE	Yes	2	Other (Medium)		2	Medium	F	2009-11-01	FALSE	FALSE
8697	5934	2017-03-13	67	294.286	2060	5	5.64384	middle-aged	3.52	6	5.17	2.1	FALSE	Yes	231	Pug		1	Small	F	2011-07-23	FALSE	FALSE
8671	3816	2017-03-12	90	393.143	2752	7	7.53973	middle-aged	3.29	5.82	5.81	2.19	TRUE	Yes	60	Border Terrier		1	Small	F	2009-08-29	FALSE	FALSE
8675	5519	2017-03-12	13	57.8571	405	1	1.10959	young	4.15	6	6	4.26	FALSE	Yes	4	Mixed (Small)		1	Small	M	2016-02-01	FALSE	FALSE
8677	3361	2017-03-12	48	210.143	1471	4	4.03014	middle-aged	3.9	6	6	4.26	FALSE	Yes	4	Mixed (Small)		1	Small	F	2013-03-02	FALSE	FALSE
8660	5905	2017-03-11	6	27.1429	190	0	0.520548	young	3.66	6	5.8	3.39	FALSE	Yes	215	Patterdale Terrier		1	Small	M	2016-09-02	FALSE	FALSE
8656	5526	2017-03-10	180	786.143	5503	15	15.0767	old	1.83	4.51	3.8	2.48	TRUE	Yes	205	Norfolk Terrier		1	Small	M	2002-02-14	FALSE	TRUE
8657	5902	2017-03-10	90	391.286	2739	7	7.50411	middle-aged	4.01	6	5.9	3.97	TRUE	Yes	131	German Spitz (Mittel)		2	Medium	F	2009-09-09	FALSE	TRUE
8622	5399	2017-03-08	163	711.571	4981	13	13.6466	old	2.72	4.88	5.44	2.97	TRUE	Yes	4	Mixed (Small)		1	Small	F	2003-07-19	FALSE	FALSE
8610	5506	2017-03-07	5	25.2857	177	0	0.484932	young	3.33	5.49	5.81	3.55	FALSE	Yes	64	Boxer		3	Large	F	2016-09-11	FALSE	FALSE
8600	5166	2017-03-06	14	62.7143	439	1	1.20274	young	4.15	6	6	4.26	FALSE	Yes	136	Retriever - Golden		3	Large	M	2015-12-23	FALSE	FALSE
8601	5137	2017-03-06	51	225.714	1580	4	4.32877	middle-aged	4.15	6	6	4.26	FALSE	Yes	274	Spaniel - English Springer		2	Medium	F	2012-11-07	FALSE	FALSE
8603	5815	2017-03-06	129	561.571	3931	10	10.7699	old	2.82	5.53	5.14	3.55	TRUE	Yes	64	Boxer		3	Large	F	2006-06-01	FALSE	FALSE
8593	4937	2017-03-05	10	43.5714	305	0	0.835616	young	4.01	6	6	3.97	FALSE	Yes	274	Spaniel - English Springer		2	Medium	M	2016-05-04	FALSE	FALSE
8587	5810	2017-03-04	45	196.143	1373	3	3.76164	young	2.43	4.87	4.72	2.36	FALSE	Yes	136	Retriever - Golden		3	Large	F	2013-05-31	FALSE	TRUE
8588	3997	2017-03-04	40	176.714	1237	3	3.38904	young	4.15	6	6	4.26	FALSE	Yes	96	Spaniel - English Cocker		2	Medium	M	2013-10-14	FALSE	FALSE
8589	5811	2017-03-04	6	26.5714	186	0	0.509589	young	3.22	5.02	6	4.26	FALSE	Yes	261	Shih Tzu		1	Small	F	2016-08-30	FALSE	FALSE
8590	5812	2017-03-04	4	19.8571	139	0	0.380822	young	3.63	6	5.9	3.48	FALSE	Yes	124	Bulldog - French		1	Small	M	2016-10-16	FALSE	FALSE
8591	2852	2017-03-04	29	130.143	911	2	2.49589	young	3.44	6	5.9	3.68	FALSE	Yes	179	Lakeland Terrier		2	Medium	F	2014-09-05	FALSE	FALSE
8573	5804	2017-03-03	24	105	735	2	2.0137	young	4.06	6	6	3.97	FALSE	Yes	163	Jack/Parson Russell Terrier		1	Small	F	2015-02-27	FALSE	FALSE
8574	5805	2017-03-03	24	105	735	2	2.0137	young	4.15	6	6	4.26	FALSE	Yes	163	Jack/Parson Russell Terrier		1	Small	M	2015-02-27	FALSE	TRUE
8370	5743	2017-03-02	65	285.857	2001	5	5.48219	middle-aged	3.25	4.74	4.84	1.77	FALSE	qol.transition_question.answer.yes	189	Maltese		1	Small	M	2011-09-09	FALSE	TRUE
8371	3180	2017-03-02	30	134.571	942	2	2.58082	young	3.45	4.79	4.94	2.49	FALSE	qol.transition_question.answer.yes	4	Mixed (Small)		1	Small	M	2014-08-03	FALSE	FALSE
8372	5744	2017-03-02	9	40.5714	284	0	0.778082	young	2.86	4.76	5.36	3.06	FALSE	qol.transition_question.answer.yes	177	Retriever - Labrador		3	Large	M	2016-05-22	FALSE	FALSE
8373	5388	2017-03-02	16	72.8571	510	1	1.39726	young	2.08	3.99	3.94	2.13	FALSE	qol.transition_question.answer.yes	170	King Charles Spaniel (Standard)		1	Small	F	2015-10-09	FALSE	FALSE
8374	5745	2017-03-02	18	79	553	1	1.51507	young	4.06	6	6	3.97	FALSE	qol.transition_question.answer.yes	38	Beagle		2	Medium	M	2015-08-27	FALSE	FALSE
8379	5747	2017-03-02	112	487.571	3413	9	9.35068	old	3.71	6	5.8	3.72	TRUE	qol.transition_question.answer.yes	1	Other (Small)		1	Small	F	2007-10-28	FALSE	FALSE
8389	4768	2017-03-02	153	666.571	4666	12	12.7836	old	2.71	4.95	5.68	2.97	TRUE	qol.transition_question.answer.yes	163	Jack/Parson Russell Terrier		1	Small	M	2004-05-23	FALSE	FALSE
8390	5750	2017-03-02	75	329.429	2306	6	6.31781	middle-aged	3.76	5.73	5.47	3.22	FALSE	qol.transition_question.answer.yes	101	Cross Breed (Unknown X )/ Mongrel		4	Extra Large	M	2010-11-08	FALSE	TRUE
8391	5751	2017-03-02	89	390.286	2732	7	7.48493	middle-aged	3.19	5.82	4.99	2.44	TRUE	qol.transition_question.answer.yes	101	Cross Breed (Unknown X )/ Mongrel		4	Extra Large	F	2009-09-08	FALSE	TRUE
8394	5390	2017-03-02	88	382.571	2678	7	7.33699	middle-aged	3.78	5.91	5.19	3.55	TRUE	qol.transition_question.answer.yes	2	Other (Medium)		2	Medium	F	2009-11-01	FALSE	FALSE
8412	5755	2017-03-02	53	231.429	1620	4	4.43836	middle-aged	4.15	6	6	4.26	FALSE	qol.transition_question.answer.yes	304	Whippet		2	Medium	M	2012-09-24	FALSE	FALSE
8413	4966	2017-03-02	53	231.429	1620	4	4.43836	middle-aged	4.15	6	6	4.26	FALSE	qol.transition_question.answer.yes	304	Whippet		2	Medium	F	2012-09-24	FALSE	FALSE
8417	5244	2017-03-02	122	530.429	3713	10	10.1726	old	3.08	5.91	4.89	3.84	TRUE	qol.transition_question.answer.yes	5	Mixed (Medium)		2	Medium	F	2007-01-01	FALSE	FALSE
8422	4253	2017-03-02	68	295.857	2071	5	5.67397	middle-aged	3.32	6	5.27	4.26	FALSE	qol.transition_question.answer.yes	64	Boxer		3	Large	F	2011-07-01	FALSE	FALSE
8424	5758	2017-03-02	6	28.4286	199	0	0.545205	young	3.87	6	6	3.43	FALSE	qol.transition_question.answer.yes	101	Cross Breed (Unknown X )/ Mongrel		4	Extra Large	F	2016-08-15	FALSE	FALSE
8427	4016	2017-03-02	47	205.286	1437	3	3.93699	young	3.55	5.83	5.9	3.97	FALSE	qol.transition_question.answer.yes	199	Schnauzer (Miniature)		1	Small	F	2013-03-26	FALSE	FALSE
8432	5593	2017-03-02	22	98	686	1	1.87945	young	3.43	5.73	5.53	3.04	FALSE	qol.transition_question.answer.yes	162	Jack Chi (X Jack Russell/Chihuahua)		1	Small	M	2015-04-16	FALSE	FALSE
8433	5759	2017-03-02	64	280.286	1962	5	5.37534	middle-aged	3.93	5.91	5.77	4.26	FALSE	qol.transition_question.answer.yes	246	Rottweiler		3	Large	F	2011-10-18	FALSE	FALSE
8437	4811	2017-03-02	22	99.4286	696	1	1.90685	young	3.63	5.91	5.9	4.26	FALSE	qol.transition_question.answer.yes	5	Mixed (Medium)		2	Medium	M	2015-04-06	FALSE	FALSE
8440	5761	2017-03-02	3	16.4286	115	0	0.315068	young	3.43	6	5.27	2.73	FALSE	qol.transition_question.answer.yes	5	Mixed (Medium)		2	Medium	F	2016-11-07	FALSE	FALSE
8441	5286	2017-03-02	25	111.714	782	2	2.14247	young	4.15	4.87	6	4.26	FALSE	qol.transition_question.answer.yes	215	Patterdale Terrier		1	Small	M	2015-01-10	FALSE	FALSE
8442	5762	2017-03-02	53	233.143	1632	4	4.47123	middle-aged	3.3	5.53	5.23	3.26	FALSE	qol.transition_question.answer.yes	96	Spaniel - English Cocker		2	Medium	F	2012-09-12	FALSE	FALSE
8445	3866	2017-03-02	105	460.429	3223	8	8.83014	old	3.93	5.49	5.47	3.22	TRUE	qol.transition_question.answer.yes	177	Retriever - Labrador		3	Large	F	2008-05-05	FALSE	TRUE
8448	2723	2017-03-02	24	108	756	2	2.07123	young	4.15	6	5.47	3.22	FALSE	qol.transition_question.answer.yes	96	Spaniel - English Cocker		2	Medium	M	2015-02-05	FALSE	FALSE
8450	4993	2017-03-02	52	226	1582	4	4.33425	middle-aged	4	5.9	4.88	2.68	FALSE	qol.transition_question.answer.yes	59	Border Collie		2	Medium	M	2012-11-01	FALSE	FALSE
8451	5678	2017-03-02	181	790.143	5531	15	15.1534	old	3.12	5.11	5.03	2.3	TRUE	qol.transition_question.answer.yes	163	Jack/Parson Russell Terrier		1	Small	M	2002-01-09	FALSE	FALSE
8452	5764	2017-03-02	62	269.571	1887	5	5.16986	middle-aged	3.5	5.82	5.81	4.09	FALSE	qol.transition_question.answer.yes	96	Spaniel - English Cocker		2	Medium	F	2012-01-01	FALSE	FALSE
8454	5765	2017-03-02	112	489.429	3426	9	9.3863	old	3.6	5	5.51	4.26	TRUE	qol.transition_question.answer.yes	255	Scottish Terrier		2	Medium	M	2007-10-15	FALSE	FALSE
8455	5766	2017-03-02	9	42.8571	300	0	0.821918	young	4.07	6	6	3.43	FALSE	qol.transition_question.answer.yes	5	Mixed (Medium)		2	Medium	M	2016-05-06	FALSE	FALSE
8460	5282	2017-03-02	10	45.2857	317	0	0.868493	young	3.89	5.15	6	2.65	FALSE	qol.transition_question.answer.yes	280	Spanish Water Dog		2	Medium	M	2016-04-19	FALSE	FALSE
8461	5769	2017-03-02	16	70	490	1	1.34247	young	3.77	5.37	6	4.26	FALSE	qol.transition_question.answer.yes	52	Bichon Frise		1	Small	M	2015-10-29	FALSE	FALSE
8463	5770	2017-03-02	4	19.7143	138	0	0.378082	young	3.29	5.82	5.72	3.01	FALSE	qol.transition_question.answer.yes	261	Shih Tzu		1	Small	M	2016-10-15	FALSE	FALSE
8465	4639	2017-03-02	36	157.714	1104	3	3.02466	young	4.15	6	6	4.26	FALSE	qol.transition_question.answer.yes	274	Spaniel - English Springer		2	Medium	F	2014-02-22	FALSE	FALSE
8469	5326	2017-03-02	112	489.571	3427	9	9.38904	old	2.93	5.74	5.1	3.3	TRUE	qol.transition_question.answer.yes	5	Mixed (Medium)		2	Medium	F	2007-10-14	FALSE	FALSE
8470	4297	2017-03-02	133	582.286	4076	11	11.1671	old	3.83	5.39	5.26	4.01	TRUE	qol.transition_question.answer.yes	303	West Highland White Terrier		1	Small	M	2006-01-03	FALSE	TRUE
8471	3632	2017-03-02	30	132.143	925	2	2.53425	young	3.29	5.82	5.9	3.72	FALSE	qol.transition_question.answer.yes	274	Spaniel - English Springer		2	Medium	F	2014-08-20	FALSE	TRUE
8473	5599	2017-03-02	41	179.286	1255	3	3.43836	young	4.07	6	5.89	4.26	FALSE	qol.transition_question.answer.yes	261	Shih Tzu		1	Small	F	2013-09-24	FALSE	FALSE
8474	3027	2017-03-02	40	177.143	1240	3	3.39726	young	3.7	6	5.36	4.26	FALSE	qol.transition_question.answer.yes	163	Jack/Parson Russell Terrier		1	Small	F	2013-10-09	FALSE	TRUE
8475	5771	2017-03-02	5	23.5714	165	0	0.452055	young	3.91	6	6	4.26	FALSE	qol.transition_question.answer.yes	101	Cross Breed (Unknown X )/ Mongrel		4	Extra Large	M	2016-09-18	FALSE	FALSE
8477	5772	2017-03-02	58	255.571	1789	4	4.90137	middle-aged	3.83	6	6	4.26	FALSE	qol.transition_question.answer.yes	177	Retriever - Labrador		3	Large	M	2012-04-08	FALSE	FALSE
8478	2938	2017-03-02	23	103.286	723	1	1.98082	young	3.62	5.9	5.9	3.43	FALSE	qol.transition_question.answer.yes	95	Cockapoo / Cockerpoo / Spoodle (X Spaniel/Poodle)		2	Medium	M	2015-03-10	FALSE	FALSE
8484	5625	2017-03-02	69	300.714	2105	5	5.76712	middle-aged	3.9	6	6	4.26	FALSE	qol.transition_question.answer.yes	199	Schnauzer (Miniature)		1	Small	F	2011-05-28	FALSE	TRUE
8486	4906	2017-03-02	121	528.571	3700	10	10.137	old	3.91	5.91	5.89	4.26	TRUE	qol.transition_question.answer.yes	177	Retriever - Labrador		3	Large	M	2007-01-14	FALSE	TRUE
8487	5773	2017-03-02	41	180.429	1263	3	3.46027	young	3.27	5.91	5.81	2.39	FALSE	qol.transition_question.answer.yes	246	Rottweiler		3	Large	M	2013-09-16	FALSE	FALSE
8494	5295	2017-03-02	17	77.1429	540	1	1.47945	young	4.15	6	6	2.81	FALSE	qol.transition_question.answer.yes	96	Spaniel - English Cocker		2	Medium	F	2015-09-09	FALSE	TRUE
8495	2586	2017-03-02	23	103.571	725	1	1.9863	young	4	6	5.85	3.43	FALSE	qol.transition_question.answer.yes	177	Retriever - Labrador		3	Large	F	2015-03-08	FALSE	FALSE
8497	2671	2017-03-02	58	252.714	1769	4	4.84658	middle-aged	4.15	6	6	2.65	FALSE	qol.transition_question.answer.yes	226	Poodle (Toy)		1	Small	F	2012-04-28	FALSE	FALSE
8498	2672	2017-03-02	129	562.714	3939	10	10.7918	old	3.87	5.91	5.9	3.43	TRUE	qol.transition_question.answer.yes	225	Poodle (Standard)		3	Large	F	2006-05-20	FALSE	FALSE
8499	5774	2017-03-02	104	456	3192	8	8.74521	old	3.21	4.65	5.58	1.94	TRUE	qol.transition_question.answer.yes	163	Jack/Parson Russell Terrier		1	Small	F	2008-06-05	FALSE	FALSE
8502	5775	2017-03-02	10	45.1429	316	0	0.865753	young	3.27	5.23	5.35	2.32	FALSE	qol.transition_question.answer.yes	96	Spaniel - English Cocker		2	Medium	M	2016-04-20	FALSE	FALSE
8504	4650	2017-03-02	11	48.5714	340	0	0.931507	young	4.15	6	6	4.26	FALSE	qol.transition_question.answer.yes	261	Shih Tzu		1	Small	F	2016-03-27	FALSE	FALSE
8507	4032	2017-03-02	55	241	1687	4	4.62192	middle-aged	3.88	6	6	4.26	FALSE	qol.transition_question.answer.yes	38	Beagle		2	Medium	M	2012-07-19	FALSE	FALSE
8510	5778	2017-03-02	5	24.5714	172	0	0.471233	young	4.09	6	5.56	2.81	FALSE	qol.transition_question.answer.yes	274	Spaniel - English Springer		2	Medium	M	2016-09-11	FALSE	FALSE
8511	5722	2017-03-02	99	431.143	3018	8	8.26849	old	2.08	4.56	5.68	3.48	TRUE	qol.transition_question.answer.yes	215	Patterdale Terrier		1	Small	M	2008-11-26	FALSE	FALSE
8512	4846	2017-03-02	80	350.571	2454	6	6.72329	middle-aged	3.36	5.36	5.44	1.99	FALSE	qol.transition_question.answer.yes	101	Cross Breed (Unknown X )/ Mongrel		4	Extra Large	F	2010-06-13	FALSE	FALSE
8513	4753	2017-03-02	47	204.286	1430	3	3.91781	young	3.65	5.91	5.9	4.01	FALSE	qol.transition_question.answer.yes	52	Bichon Frise		1	Small	F	2013-04-02	FALSE	TRUE
8515	5779	2017-03-02	53	232.857	1630	4	4.46575	middle-aged	4.09	5.91	6	2.52	FALSE	qol.transition_question.answer.yes	101	Cross Breed (Unknown X )/ Mongrel		4	Extra Large	M	2012-09-14	FALSE	FALSE
8516	4243	2017-03-02	13	57.2857	401	1	1.09863	young	4.15	6	6	2.9	FALSE	qol.transition_question.answer.yes	246	Rottweiler		3	Large	M	2016-01-26	FALSE	FALSE
8518	5780	2017-03-02	154	670.714	4695	12	12.863	old	2.68	5.37	5.8	4.26	TRUE	qol.transition_question.answer.yes	183	Lhasa Apso		1	Small	F	2004-04-24	FALSE	FALSE
8520	5781	2017-03-02	51	224.429	1571	4	4.30411	middle-aged	3.95	5.65	5.65	3.57	FALSE	qol.transition_question.answer.yes	265	Husky - Siberian		3	Large	F	2012-11-12	FALSE	FALSE
8521	5782	2017-03-02	7	31.5714	221	0	0.605479	young	2.08	3.99	3.94	2.13	FALSE	qol.transition_question.answer.yes	199	Schnauzer (Miniature)		1	Small	F	2016-07-24	FALSE	FALSE
8522	5783	2017-03-02	5	23.5714	165	0	0.452055	young	3.96	6	6	3.97	FALSE	qol.transition_question.answer.yes	253	Schnoodle (X Schnauzer/Poodle)		2	Medium	F	2016-09-18	FALSE	FALSE
8523	5784	2017-03-02	8	38	266	0	0.728767	young	3.78	5.63	6	3.72	FALSE	qol.transition_question.answer.yes	101	Cross Breed (Unknown X )/ Mongrel		4	Extra Large	M	2016-06-09	FALSE	FALSE
8524	5620	2017-03-02	61	267.429	1872	5	5.12877	middle-aged	2.95	4.66	4.26	3.72	FALSE	qol.transition_question.answer.yes	199	Schnauzer (Miniature)		1	Small	F	2012-01-16	FALSE	TRUE
8527	5248	2017-03-02	21	95.5714	669	1	1.83288	young	3.9	6	6	3.72	FALSE	qol.transition_question.answer.yes	177	Retriever - Labrador		3	Large	M	2015-05-03	FALSE	FALSE
8531	4506	2017-03-02	20	89.7143	628	1	1.72055	young	2.81	5.06	5.02	3.52	FALSE	qol.transition_question.answer.yes	90	Chinese Shar Pei		3	Large	F	2015-06-13	FALSE	FALSE
8532	5786	2017-03-02	4	17.1429	120	0	0.328767	young	3.28	5.06	4.94	3.13	FALSE	qol.transition_question.answer.yes	86	Chihuahua - Long Coat		1	Small	M	2016-11-02	FALSE	FALSE
8534	5271	2017-03-02	7	30.4286	213	0	0.583562	young	4.01	5.11	6	4.26	FALSE	qol.transition_question.answer.yes	177	Retriever - Labrador		3	Large	M	2016-08-01	FALSE	FALSE
8535	2916	2017-03-02	24	104.429	731	2	2.00274	young	4.15	6	6	4.26	FALSE	qol.transition_question.answer.yes	4	Mixed (Small)		1	Small	F	2015-03-02	FALSE	TRUE
8540	4722	2017-03-02	22	96.8571	678	1	1.85753	young	4.15	6	6	4.26	FALSE	qol.transition_question.answer.yes	96	Spaniel - English Cocker		2	Medium	F	2015-04-24	FALSE	FALSE
8541	4723	2017-03-02	13	59.5714	417	1	1.14247	young	4.15	5.39	6	4.26	FALSE	qol.transition_question.answer.yes	278	Spaniel - Welsh Springer		2	Medium	F	2016-01-10	FALSE	FALSE
8542	5787	2017-03-02	4	18.4286	129	0	0.353425	young	4.09	6	6	4.26	FALSE	qol.transition_question.answer.yes	38	Beagle		2	Medium	F	2016-10-24	FALSE	FALSE
8545	5788	2017-03-02	4	17.4286	122	0	0.334247	young	2.34	3.51	4.05	2.84	FALSE	qol.transition_question.answer.yes	136	Retriever - Golden		3	Large	M	2016-10-31	FALSE	FALSE
8547	4510	2017-03-02	11	50.2857	352	0	0.964384	young	4.15	5.39	6	4.26	FALSE	qol.transition_question.answer.yes	96	Spaniel - English Cocker		2	Medium	M	2016-03-15	FALSE	FALSE
8549	5294	2017-03-02	194	843.286	5903	16	16.1726	old	2.38	4.66	4.69	3.09	TRUE	qol.transition_question.answer.yes	163	Jack/Parson Russell Terrier		1	Small	M	2001-01-02	FALSE	FALSE
8550	2751	2017-03-02	116	505.429	3538	9	9.69315	old	4.09	5.91	6	2.32	TRUE	qol.transition_question.answer.yes	274	Spaniel - English Springer		2	Medium	F	2007-06-25	FALSE	FALSE
8552	5789	2017-03-02	14	62.5714	438	1	1.2	young	4.15	5.39	6	4.26	FALSE	qol.transition_question.answer.yes	64	Boxer		3	Large	M	2015-12-20	FALSE	TRUE
8555	5790	2017-03-02	34	149.286	1045	2	2.86301	young	3.98	6	6	2.52	FALSE	qol.transition_question.answer.yes	103	Dachshund (Standard)		2	Medium	F	2014-04-22	FALSE	TRUE
8556	5791	2017-03-02	27	118.571	830	2	2.27397	young	3.57	5.23	6	4.01	FALSE	qol.transition_question.answer.yes	26	Australian Silky Terrier		1	Small	M	2014-11-23	FALSE	TRUE
8557	5792	2017-03-02	28	122.429	857	2	2.34795	young	4.09	5.82	6	4.26	FALSE	qol.transition_question.answer.yes	26	Australian Silky Terrier		1	Small	M	2014-10-27	FALSE	TRUE
8558	5793	2017-03-02	152	661.571	4631	12	12.6877	old	2.93	5.47	5.9	4.01	TRUE	qol.transition_question.answer.yes	26	Australian Silky Terrier		1	Small	M	2004-06-27	FALSE	TRUE
8559	5794	2017-03-02	23	103.714	726	1	1.98904	young	3.6	5.31	6	2.65	FALSE	qol.transition_question.answer.yes	26	Australian Silky Terrier		1	Small	F	2015-03-07	FALSE	TRUE
8560	5795	2017-03-02	65	283.429	1984	5	5.43562	middle-aged	2.93	5.82	5.9	3.23	FALSE	qol.transition_question.answer.yes	26	Australian Silky Terrier		1	Small	F	2011-09-26	FALSE	TRUE
8561	5796	2017-03-02	121	529	3703	10	10.1452	old	3.65	5.81	5.91	4.09	TRUE	qol.transition_question.answer.yes	26	Australian Silky Terrier		1	Small	M	2007-01-11	FALSE	FALSE
8562	5797	2017-03-02	30	132.286	926	2	2.53699	young	3.96	6	6	4.26	FALSE	qol.transition_question.answer.yes	26	Australian Silky Terrier		1	Small	M	2014-08-19	FALSE	FALSE
8563	5798	2017-03-02	140	612.143	4285	11	11.7397	old	3.23	5.49	5.91	4.09	TRUE	qol.transition_question.answer.yes	26	Australian Silky Terrier		1	Small	M	2005-06-08	FALSE	FALSE
8564	5799	2017-03-02	39	172.429	1207	3	3.30685	young	3.74	6	6	3.39	FALSE	qol.transition_question.answer.yes	26	Australian Silky Terrier		1	Small	M	2013-11-11	FALSE	FALSE
8565	5800	2017-03-02	132	577.571	4043	11	11.0767	old	4.09	6	6	3.72	TRUE	qol.transition_question.answer.yes	26	Australian Silky Terrier		1	Small	F	2006-02-05	FALSE	TRUE
8570	4489	2017-03-02	43	190.571	1334	3	3.65479	young	3.75	5.91	5.36	3.43	FALSE	Yes	95	Cockapoo / Cockerpoo / Spoodle (X Spaniel/Poodle)		2	Medium	M	2013-07-07	FALSE	FALSE
8360	5741	2017-03-01	80	348.429	2439	6	6.68219	middle-aged	2.94	6	4.59	1.07	FALSE	Yes	4	Mixed (Small)		1	Small	F	2010-06-27	FALSE	FALSE
8364	5742	2017-03-01	25	112.429	787	2	2.15616	young	4.09	6	6	4.26	FALSE	Yes	128	German Shepherd / Alsatian		3	Large	M	2015-01-04	FALSE	FALSE
8353	5735	2017-02-28	54	236.429	1655	4	4.53425	middle-aged	4.09	6	5.9	4.26	FALSE	Yes	52	Bichon Frise		1	Small	F	2012-08-18	FALSE	FALSE
8354	5736	2017-02-28	5	26	182	0	0.49863	young	3.69	5.85	6	2.94	FALSE	Yes	261	Shih Tzu		1	Small	F	2016-08-30	FALSE	FALSE
8347	1192	2017-02-27	122	532	3724	10	10.2027	old	4.15	6	6	4.26	TRUE	Yes	3	Other (Large)		3	Large	M	2006-12-18	FALSE	FALSE
8339	3264	2017-02-26	29	126.714	887	2	2.43014	young	3.76	5.82	5.36	3.97	FALSE	Yes	96	Spaniel - English Cocker		2	Medium	M	2014-09-23	FALSE	FALSE
8332	5724	2017-02-25	13	60.1429	421	1	1.15342	young	3.53	6	5.28	3.55	FALSE	Yes	5	Mixed (Medium)		2	Medium	M	2016-01-01	FALSE	TRUE
8326	4271	2017-02-24	60	264.571	1852	5	5.07397	middle-aged	4.01	6	5.9	3.72	FALSE	Yes	309	Yorkshire Terrier		1	Small	M	2012-01-30	FALSE	FALSE
8323	5719	2017-02-23	39	172.714	1209	3	3.31233	young	3.96	6	6	3.23	FALSE	Yes	298	Weimaraner		3	Large	F	2013-11-02	FALSE	FALSE
8312	3537	2017-02-22	76	330.857	2316	6	6.34521	middle-aged	4.15	5.39	6	4.26	FALSE	Yes	86	Chihuahua - Long Coat		1	Small	M	2010-10-21	FALSE	TRUE
8314	3538	2017-02-22	132	577.714	4044	11	11.0795	old	4.15	6	6	4.26	TRUE	Yes	42	Bedlington Terrier		2	Medium	F	2006-01-27	FALSE	TRUE
8315	5714	2017-02-22	124	539.429	3776	10	10.3452	old	2.65	5.74	5.7	4.26	TRUE	Yes	59	Border Collie		2	Medium	F	2006-10-22	FALSE	FALSE
8317	5716	2017-02-22	42	185	1295	3	3.54795	young	3.43	6	5.9	2.52	FALSE	Yes	4	Mixed (Small)		1	Small	M	2013-08-07	FALSE	FALSE
8299	5708	2017-02-21	180	782.714	5479	15	15.011	old	3.12	5.11	5.03	2.3	TRUE	Yes	163	Jack/Parson Russell Terrier		1	Small	M	2002-02-21	FALSE	FALSE
8300	5709	2017-02-21	84	365.286	2557	7	7.00548	middle-aged	3.75	6	5.78	4.26	FALSE	Yes	98	Collie - Rough Coat		2	Medium	F	2010-02-21	FALSE	FALSE
8305	4940	2017-02-21	8	36.2857	254	0	0.69589	young	2.72	5.25	5.63	2.55	FALSE	Yes	163	Jack/Parson Russell Terrier		1	Small	F	2016-06-12	FALSE	FALSE
8309	3010	2017-02-21	46	201.857	1413	3	3.87123	young	3.46	6	5.9	3.97	FALSE	Yes	183	Lhasa Apso		1	Small	M	2013-04-10	FALSE	FALSE
8278	5698	2017-02-19	16	73.5714	515	1	1.41096	young	3.96	6	6	4.26	FALSE	Yes	284	Bull Terrier - Staffordshire		2	Medium	F	2015-09-23	FALSE	FALSE
8276	5446	2017-02-18	6	29.2857	205	0	0.561644	young	4.01	6	6	3.68	FALSE	Yes	95	Cockapoo / Cockerpoo / Spoodle (X Spaniel/Poodle)		2	Medium	M	2016-07-28	FALSE	FALSE
8262	4868	2017-02-16	23	104.286	730	1	2	young	3.87	5.39	6	3.72	FALSE	Yes	199	Schnauzer (Miniature)		1	Small	M	2015-02-17	FALSE	FALSE
8263	1308	2017-02-16	108	470.571	3294	9	9.02466	old	2.08	3.99	3.94	2.13	TRUE	Yes	177	Retriever - Labrador		3	Large	M	2008-02-10	FALSE	FALSE
8253	5173	2017-02-15	41	179.857	1259	3	3.44932	young	3.61	6	5.36	3.68	FALSE	Yes	6	Mixed (Large)		3	Large	M	2013-09-05	FALSE	FALSE
8255	5689	2017-02-15	7	32.7143	229	0	0.627397	young	2.98	4.96	4.36	3.03	FALSE	Yes	87	Chihuahua - Smooth Coat		1	Small	M	2016-07-01	FALSE	TRUE
8258	5691	2017-02-15	6	28.7143	201	0	0.550685	young	3.68	6	5.21	3.84	FALSE	Yes	5	Mixed (Medium)		2	Medium	F	2016-07-29	FALSE	TRUE
8259	2628	2017-02-15	32	140.714	985	2	2.69863	young	2.59	4.78	5.8	2.9	FALSE	Yes	95	Cockapoo / Cockerpoo / Spoodle (X Spaniel/Poodle)		2	Medium	M	2014-06-06	FALSE	FALSE
8242	5384	2017-02-13	80	350	2450	6	6.71233	middle-aged	4.09	5.39	6	4.26	FALSE	Yes	183	Lhasa Apso		1	Small	M	2010-05-31	FALSE	FALSE
8234	2858	2017-02-12	58	255.857	1791	4	4.90685	middle-aged	4.15	6	6	4.26	FALSE	Yes	60	Border Terrier		1	Small	F	2012-03-19	FALSE	TRUE
8222	4707	2017-02-11	9	40.7143	285	0	0.780822	young	3.49	5.43	5.9	4.26	FALSE	Yes	231	Pug		1	Small	M	2016-05-02	FALSE	FALSE
8224	5670	2017-02-11	6	29	203	0	0.556164	young	4.15	6	6	4.26	FALSE	Yes	5	Mixed (Medium)		2	Medium	F	2016-07-23	FALSE	TRUE
8225	5671	2017-02-11	21	93	651	1	1.78356	young	4.15	6	6	4.26	FALSE	Yes	36	Basset Hound		3	Large	F	2015-05-02	FALSE	FALSE
8226	5672	2017-02-11	104	454	3178	8	8.70685	old	3.17	6	5.8	2.9	TRUE	Yes	96	Spaniel - English Cocker		2	Medium	F	2008-05-31	FALSE	TRUE
8227	5673	2017-02-11	6	29	203	0	0.556164	young	4.15	6	6	3.72	FALSE	Yes	5	Mixed (Medium)		2	Medium	F	2016-07-23	FALSE	TRUE
8213	5668	2017-02-09	3	16.8571	118	0	0.323288	young	3.85	5.9	5.47	2.93	FALSE	Yes	59	Border Collie		2	Medium	M	2016-10-14	FALSE	FALSE
8216	4764	2017-02-09	11	50.4286	353	0	0.967123	young	3.94	5.92	6	3.19	FALSE	Yes	6	Mixed (Large)		3	Large	F	2016-02-22	FALSE	FALSE
8212	5667	2017-02-08	39	170.571	1194	3	3.27123	young	3.79	5.54	6	3.72	FALSE	Yes	6	Mixed (Large)		3	Large	M	2013-11-02	FALSE	TRUE
8201	5412	2017-02-07	5	24.8571	174	0	0.476712	young	3.45	5.71	5.38	3.62	FALSE	Yes	3	Other (Large)		3	Large	M	2016-08-17	FALSE	FALSE
8203	5112	2017-02-07	56	244.429	1711	4	4.68767	middle-aged	2.91	5.54	5.8	2.9	FALSE	Yes	129	German Pointer- Shorthaired		3	Large	F	2012-06-02	FALSE	FALSE
8205	5663	2017-02-07	61	266.286	1864	5	5.10685	middle-aged	4.01	6	6	4.26	FALSE	Yes	261	Shih Tzu		1	Small	M	2012-01-01	FALSE	FALSE
8206	5664	2017-02-07	20	87.8571	615	1	1.68493	young	2.93	4.74	5.18	2.35	FALSE	Yes	274	Spaniel - English Springer		2	Medium	F	2015-06-03	FALSE	FALSE
8192	4818	2017-02-06	8	36.5714	256	0	0.70137	young	3.59	5.33	5.5	4.26	FALSE	Yes	40	Bearded Collie		3	Large	M	2016-05-26	FALSE	TRUE
8187	5656	2017-02-05	137	597.286	4181	11	11.4548	old	3.4	5.3	5.9	4.26	TRUE	Yes	309	Yorkshire Terrier		1	Small	M	2005-08-26	FALSE	TRUE
8189	4413	2017-02-05	46	202.286	1416	3	3.87945	young	3.42	5.9	5.9	3.97	FALSE	Yes	101	Cross Breed (Unknown X )/ Mongrel		4	Extra Large	M	2013-03-22	FALSE	TRUE
8191	4706	2017-02-05	18	80.5714	564	1	1.54521	young	3.87	6	6	4.26	FALSE	Yes	124	Bulldog - French		1	Small	M	2015-07-22	FALSE	FALSE
8182	5654	2017-02-04	34	148.571	1040	2	2.84932	young	4.09	6	6	2.52	FALSE	Yes	128	German Shepherd / Alsatian		3	Large	M	2014-04-01	FALSE	FALSE
8183	5655	2017-02-04	47	206.286	1444	3	3.95616	young	3.79	6	5.9	4.01	FALSE	Yes	246	Rottweiler		3	Large	F	2013-02-21	FALSE	FALSE
8185	4551	2017-02-04	83	362.714	2539	6	6.95616	middle-aged	4.15	6	6	4.26	FALSE	Yes	246	Rottweiler		3	Large	F	2010-02-22	FALSE	TRUE
8186	4244	2017-02-04	15	68.7143	481	1	1.31781	young	4.15	6	6	4.26	FALSE	Yes	124	Bulldog - French		1	Small	F	2015-10-12	FALSE	FALSE
8164	5638	2017-02-02	15	68.4286	479	1	1.31233	young	3.9	5.9	5.9	3.43	FALSE	Yes	5	Mixed (Medium)		2	Medium	M	2015-10-12	FALSE	TRUE
8170	5643	2017-02-02	111	486.571	3406	9	9.33151	old	3.84	5.54	6	4.26	TRUE	Yes	96	Spaniel - English Cocker		2	Medium	F	2007-10-07	FALSE	FALSE
8122	5612	2017-01-26	50	219.714	1538	4	4.2137	middle-aged	4.15	6	5.28	4.26	FALSE	Yes	168	Keeshond		2	Medium	M	2012-11-10	FALSE	FALSE
8079	5592	2017-01-25	31	136	952	2	2.60822	young	4.15	6	6	3.97	FALSE	Yes	284	Bull Terrier - Staffordshire		2	Medium	M	2014-06-18	FALSE	FALSE
8084	4741	2017-01-25	46	203.286	1423	3	3.89863	young	4.15	6	6	4.26	FALSE	Yes	231	Pug		1	Small	M	2013-03-04	FALSE	FALSE
8088	5595	2017-01-25	28	123.571	865	2	2.36986	young	3.89	5.82	5.8	3.19	FALSE	Yes	176	Labradoodle (X Labrador/Poodle)		3	Large	M	2014-09-13	FALSE	FALSE
8093	5597	2017-01-25	25	109	763	2	2.09041	young	3.66	6	6	2.52	FALSE	Yes	124	Bulldog - French		1	Small	M	2014-12-24	FALSE	FALSE
8096	5598	2017-01-25	8	38	266	0	0.728767	young	3.95	6	6	2.49	FALSE	Yes	96	Spaniel - English Cocker		2	Medium	M	2016-05-04	FALSE	FALSE
8099	5211	2017-01-25	117	511.571	3581	9	9.81096	old	3.48	5.63	5.24	3.43	TRUE	Yes	5	Mixed (Medium)		2	Medium	F	2007-04-07	FALSE	FALSE
8108	5605	2017-01-25	28	123	861	2	2.3589	young	4.06	5.37	6	3.97	FALSE	Yes	96	Spaniel - English Cocker		2	Medium	F	2014-09-17	FALSE	FALSE
8109	5606	2017-01-25	54	237.714	1664	4	4.5589	middle-aged	3.25	5.59	5.62	3.91	FALSE	Yes	255	Scottish Terrier		2	Medium	M	2012-07-06	FALSE	FALSE
8110	5607	2017-01-25	54	237.714	1664	4	4.5589	middle-aged	3.1	5.22	5.27	2.78	FALSE	Yes	255	Scottish Terrier		2	Medium	M	2012-07-06	FALSE	FALSE
8113	5608	2017-01-25	7	34.1429	239	0	0.654795	young	3.57	6	5.47	3.22	FALSE	Yes	261	Shih Tzu		1	Small	M	2016-05-31	FALSE	FALSE
8119	5611	2017-01-25	15	68.4286	479	1	1.31233	young	4.15	6	6	4.01	FALSE	Yes	177	Retriever - Labrador		3	Large	M	2015-10-04	FALSE	FALSE
8031	4625	2016-12-20	53	232.571	1628	4	4.46027	middle-aged	3.55	5.07	6	4.26	FALSE	Yes	274	Spaniel - English Springer		2	Medium	M	2012-07-06	FALSE	FALSE
8032	4691	2016-12-20	63	276.286	1934	5	5.29863	middle-aged	3.78	4.58	6	2.36	FALSE	Yes	176	Labradoodle (X Labrador/Poodle)		3	Large	M	2011-09-04	FALSE	FALSE
8019	4883	2016-12-19	100	438.286	3068	8	8.40548	old	4.15	5.39	4.69	3.22	TRUE	Yes	98	Collie - Rough Coat		2	Medium	M	2008-07-26	FALSE	FALSE
8003	5581	2016-12-17	76	334.571	2342	6	6.41644	middle-aged	4.15	6	6	4.26	FALSE	Yes	99	Collie - Smooth Coat		2	Medium	F	2010-07-20	FALSE	FALSE
7995	5580	2016-12-16	36	160.143	1121	3	3.07123	young	3.67	6	6	4.26	FALSE	Yes	232	Puggle (X Pug/ Beagle)		1	Small	F	2013-11-21	FALSE	FALSE
7994	4162	2016-12-15	31	137	959	2	2.6274	young	3.82	6	6	3.97	FALSE	Yes	101	Cross Breed (Unknown X )/ Mongrel		4	Extra Large	F	2014-05-01	FALSE	TRUE
7976	4131	2016-12-14	16	72	504	1	1.38082	young	4.15	6	6	4.26	FALSE	Yes	82	King Charles Spaniel - Cavalier		1	Small	F	2015-07-29	FALSE	FALSE
7981	5574	2016-12-14	5	25.2857	177	0	0.484932	young	3.57	5.3	6	3.39	FALSE	Yes	177	Retriever - Labrador		3	Large	F	2016-06-20	FALSE	FALSE
7982	5202	2016-12-14	28	123.857	867	2	2.37534	young	3.55	5.2	5.8	3.77	FALSE	Yes	261	Shih Tzu		1	Small	F	2014-07-31	FALSE	FALSE
7972	5569	2016-12-13	13	57.8571	405	1	1.10959	young	4.03	5.39	5.16	4.26	FALSE	Yes	163	Jack/Parson Russell Terrier		1	Small	F	2015-11-04	FALSE	FALSE
7964	5567	2016-12-12	129	561.429	3930	10	10.7671	old	4.06	5.91	6	4.26	TRUE	Yes	38	Beagle		2	Medium	M	2006-03-10	FALSE	FALSE
7961	5566	2016-12-11	87	379	2653	7	7.26849	middle-aged	3.59	5.9	4.78	4.26	TRUE	Yes	177	Retriever - Labrador		3	Large	M	2009-09-06	FALSE	FALSE
7952	5561	2016-12-10	12	53.5714	375	1	1.0274	young	4.15	6	6	4.26	FALSE	Yes	303	West Highland White Terrier		1	Small	M	2015-12-01	FALSE	FALSE
7953	5562	2016-12-10	14	61.8571	433	1	1.1863	young	4.15	6	6	4.26	FALSE	Yes	86	Chihuahua - Long Coat		1	Small	F	2015-10-04	FALSE	FALSE
7955	5564	2016-12-10	42	183.143	1282	3	3.51233	young	2.21	3.99	4.56	2.13	FALSE	Yes	163	Jack/Parson Russell Terrier		1	Small	F	2013-06-07	FALSE	FALSE
7947	4806	2016-12-09	21	93.5714	655	1	1.79452	young	3.94	6	5.9	4.26	FALSE	Yes	231	Pug		1	Small	F	2015-02-23	FALSE	FALSE
7939	1383	2016-12-08	141	613.714	4296	11	11.7699	old	3.08	6	5.72	3.84	TRUE	Yes	59	Border Collie		2	Medium	F	2005-03-05	FALSE	FALSE
7940	5555	2016-12-08	100	434.857	3044	8	8.33973	old	4.15	6	6	4.26	TRUE	Yes	177	Retriever - Labrador		3	Large	M	2008-08-08	FALSE	FALSE
7934	5552	2016-12-07	177	770.429	5393	14	14.7753	old	2.45	5.8	5.02	4.09	TRUE	Yes	186	Lurcher		3	Large	F	2002-03-03	FALSE	FALSE
7926	1111	2016-12-06	34	147.714	1034	2	2.83288	young	3.93	5.91	5.9	4.26	FALSE	Yes	1	Other (Small)		1	Small	F	2014-02-06	FALSE	FALSE
7915	1438	2016-12-05	25	111.857	783	2	2.14521	young	3.03	4.76	4.96	2.36	FALSE	Yes	90	Chinese Shar Pei		3	Large	F	2014-10-14	FALSE	FALSE
7916	4945	2016-12-05	18	80	560	1	1.53425	young	3.93	6	6	4.26	FALSE	Yes	96	Spaniel - English Cocker		2	Medium	F	2015-05-25	FALSE	FALSE
7920	5549	2016-12-05	51	222	1554	4	4.25753	middle-aged	3.72	5.17	4.02	3.25	FALSE	Yes	5	Mixed (Medium)		2	Medium	M	2012-09-03	FALSE	FALSE
7908	5544	2016-12-04	37	160.857	1126	3	3.08493	young	3.45	5.44	4.83	2.06	FALSE	Yes	5	Mixed (Medium)		2	Medium	M	2013-11-04	FALSE	FALSE
7903	5541	2016-12-03	6	29.7143	208	0	0.569863	young	3.97	6	5.55	3.03	FALSE	Yes	62	Boston Terrier		1	Small	F	2016-05-09	FALSE	FALSE
7891	4988	2016-12-02	6	26.4286	185	0	0.506849	young	2.54	5.01	4.8	2.04	FALSE	Yes	309	Yorkshire Terrier		1	Small	M	2016-05-31	FALSE	FALSE
7881	5532	2016-12-01	16	73.8571	517	1	1.41644	young	3.91	5.39	6	3.39	FALSE	Yes	64	Boxer		3	Large	M	2015-07-03	FALSE	FALSE
7875	5528	2016-11-30	39	172.143	1205	3	3.30137	young	3.89	6	6	2.52	FALSE	Ja	172	Kooikerhondje		2	Medium	F	2013-08-13	FALSE	FALSE
7879	5530	2016-11-30	21	92.5714	648	1	1.77534	young	4.15	5.29	6	3.23	FALSE	Yes	96	Spaniel - English Cocker		2	Medium	M	2015-02-21	FALSE	FALSE
7866	5523	2016-11-29	39	174	1218	3	3.33699	young	3.56	4.77	6	4.26	FALSE	Yes	163	Jack/Parson Russell Terrier		1	Small	M	2013-07-30	FALSE	FALSE
7870	5525	2016-11-29	16	73.8571	517	1	1.41644	young	4.15	6	6	3.97	FALSE	Yes	199	Schnauzer (Miniature)		1	Small	F	2015-07-01	FALSE	FALSE
7864	5522	2016-11-28	5	21.8571	153	0	0.419178	young	3.99	6	6	3.39	FALSE	Yes	176	Labradoodle (X Labrador/Poodle)		3	Large	M	2016-06-28	FALSE	FALSE
7852	1477	2016-11-27	123	536.143	3753	10	10.2822	old	3.2	5.73	5.48	4.09	TRUE	Yes	60	Border Terrier		1	Small	M	2006-08-19	FALSE	FALSE
7844	5514	2016-11-26	42	184.429	1291	3	3.53699	young	3.26	5.61	6	2.85	FALSE	Yes	95	Cockapoo / Cockerpoo / Spoodle (X Spaniel/Poodle)		2	Medium	M	2013-05-15	FALSE	FALSE
7847	5517	2016-11-26	11	48	336	0	0.920548	young	2.87	5.81	5.17	1.74	FALSE	Yes	95	Cockapoo / Cockerpoo / Spoodle (X Spaniel/Poodle)		2	Medium	F	2015-12-26	FALSE	FALSE
7851	4507	2016-11-26	8	38	266	0	0.728767	young	3.14	5.12	5.8	1.04	FALSE	Yes	199	Schnauzer (Miniature)		1	Small	F	2016-03-05	FALSE	FALSE
7746	4847	2016-11-24	64	282.143	1975	5	5.41096	middle-aged	3.74	6	6	2.78	FALSE	Yes	67	Briard		3	Large	M	2011-06-29	FALSE	FALSE
7796	5507	2016-11-24	70	308	2156	5	5.90685	middle-aged	3.34	5.04	5.43	3.49	FALSE	Yes	292	Tibetan Terrier		2	Medium	F	2010-12-30	FALSE	FALSE
7732	5494	2016-11-23	158	689.143	4824	13	13.2164	old	3.45	5.21	5.21	3.97	TRUE	Yes	177	Retriever - Labrador		3	Large	M	2003-09-09	FALSE	FALSE
7734	5496	2016-11-23	138	602.571	4218	11	11.5562	old	3.68	5.22	4.45	3.39	TRUE	Yes	136	Retriever - Golden		3	Large	M	2005-05-07	FALSE	TRUE
7735	2280	2016-11-23	133	579	4053	11	11.1041	old	2.08	3.99	3.94	2.13	TRUE	Yes	4	Mixed (Small)		1	Small	M	2005-10-19	FALSE	FALSE
7716	4574	2016-11-22	22	98.7143	691	1	1.89315	young	4.15	5.39	6	4.26	FALSE	Yes	86	Chihuahua - Long Coat		1	Small	M	2015-01-01	FALSE	FALSE
7722	5490	2016-11-22	7	30.8571	216	0	0.591781	young	3.87	6	5.9	4.26	FALSE	Yes	133	Schnauzer (Giant)		3	Large	M	2016-04-20	FALSE	FALSE
7725	5491	2016-11-22	53	231	1617	4	4.43014	middle-aged	3.84	6	5.9	2.9	FALSE	Yes	177	Retriever - Labrador		3	Large	M	2012-06-19	FALSE	TRUE
7702	5487	2016-11-21	101	439.714	3078	8	8.43288	old	3.36	5.54	5.43	2.48	TRUE	Ja	59	Border Collie		2	Medium	F	2008-06-18	FALSE	FALSE
7699	5485	2016-11-20	9	41.2857	289	0	0.791781	young	3.89	6	6	4.26	FALSE	Yes	128	German Shepherd / Alsatian		3	Large	F	2016-02-05	FALSE	FALSE
7677	4941	2016-11-19	157	684.714	4793	13	13.1315	old	2.44	3.9	3.85	2.84	TRUE	Yes	96	Spaniel - English Cocker		2	Medium	M	2003-10-06	FALSE	FALSE
7688	5480	2016-11-19	57	248.571	1740	4	4.76712	middle-aged	2.3	5.04	4.48	2.42	FALSE	Yes	309	Yorkshire Terrier		1	Small	F	2012-02-14	FALSE	FALSE
7655	4859	2016-11-17	149	649.857	4549	12	12.463	old	3.67	6	5.09	4.09	TRUE	Yes	275	Spaniel - Field		2	Medium	F	2004-06-04	FALSE	FALSE
7660	5141	2016-11-17	82	358.714	2511	6	6.87945	middle-aged	3.16	6	5.62	3.55	FALSE	Yes	128	German Shepherd / Alsatian		3	Large	M	2010-01-02	FALSE	FALSE
7644	4983	2016-11-16	132	576.143	4033	11	11.0493	old	2.88	5.63	4.89	3.84	TRUE	Yes	284	Bull Terrier - Staffordshire		2	Medium	F	2005-11-01	FALSE	FALSE
7635	4833	2016-11-15	34	149.857	1049	2	2.87397	young	3.46	5.19	5.15	1.48	FALSE	Yes	82	King Charles Spaniel - Cavalier		1	Small	F	2014-01-01	FALSE	FALSE
7624	3969	2016-11-13	10	47.4286	332	0	0.909589	young	3.17	5.63	5.91	3.55	FALSE	Yes	177	Retriever - Labrador		3	Large	F	2015-12-17	FALSE	FALSE
7618	3275	2016-11-12	55	240.143	1681	4	4.60548	middle-aged	4.15	6	6	3.97	FALSE	Yes	60	Border Terrier		1	Small	M	2012-04-06	FALSE	FALSE
7619	4566	2016-11-12	9	41.4286	290	0	0.794521	young	3.24	5.45	5.81	3.26	FALSE	Yes	231	Pug		1	Small	M	2016-01-27	FALSE	FALSE
7599	5436	2016-11-11	128	557.857	3905	10	10.6986	old	3.9	5.91	5.47	3.97	TRUE	Yes	303	West Highland White Terrier		1	Small	M	2006-03-04	FALSE	FALSE
7602	5438	2016-11-11	3	17.4286	122	0	0.334247	young	3.23	5.43	5.53	2.65	FALSE	Yes	255	Scottish Terrier		2	Medium	M	2016-07-12	FALSE	FALSE
7603	3749	2016-11-11	16	73.4286	514	1	1.40822	young	3.95	5.91	5.26	3.55	FALSE	Yes	72	Bulldog - British		2	Medium	F	2015-06-16	FALSE	FALSE
7607	5440	2016-11-11	171	745.143	5216	14	14.2904	old	3	5.72	5.43	3.27	TRUE	Yes	4	Mixed (Small)		1	Small	M	2002-08-01	FALSE	FALSE
7597	5434	2016-11-10	66	290.857	2036	5	5.57808	middle-aged	2.83	5.63	5.9	3.72	FALSE	Yes	136	Retriever - Golden		3	Large	F	2011-04-15	FALSE	TRUE
7598	5435	2016-11-10	45	198.714	1391	3	3.81096	young	4.15	6	6	4.01	FALSE	Yes	136	Retriever - Golden		3	Large	F	2013-01-19	FALSE	TRUE
7578	5419	2016-11-09	34	152.143	1065	2	2.91781	young	4.03	5.8	5.76	3.19	FALSE	Yes	274	Spaniel - English Springer		2	Medium	F	2013-12-10	FALSE	FALSE
7586	5427	2016-11-09	12	54.1429	379	1	1.03836	young	3.93	6	6	3.97	FALSE	Yes	309	Yorkshire Terrier		1	Small	M	2015-10-27	FALSE	FALSE
7574	4896	2016-11-08	106	462.571	3238	8	8.87123	old	4.15	6	6	4.26	TRUE	Yes	177	Retriever - Labrador		3	Large	M	2007-12-28	FALSE	FALSE
7569	5415	2016-11-07	98	427.571	2993	8	8.2	old	3.91	6	6	3.68	TRUE	Yes	225	Poodle (Standard)		3	Large	F	2008-08-28	FALSE	FALSE
7571	2217	2016-11-07	21	92.2857	646	1	1.76986	young	3.65	5.82	5.9	4.26	FALSE	Yes	129	German Pointer- Shorthaired		3	Large	M	2015-01-31	FALSE	FALSE
7552	3858	2016-11-06	45	197	1379	3	3.77808	young	4.15	6	6	4.26	FALSE	Yes	163	Jack/Parson Russell Terrier		1	Small	M	2013-01-27	FALSE	FALSE
7533	5401	2016-11-05	17	76.7143	537	1	1.47123	young	3.85	5.91	5.26	2.55	FALSE	Yes	59	Border Collie		2	Medium	F	2015-05-18	FALSE	FALSE
7534	5402	2016-11-05	133	581.286	4069	11	11.1479	old	2.67	4.84	5.11	1.78	TRUE	Yes	121	Fox Terrier - Smooth		2	Medium	F	2005-09-15	FALSE	TRUE
7540	5407	2016-11-05	67	292.857	2050	5	5.61644	middle-aged	4.03	5.39	6	3.43	FALSE	Yes	96	Spaniel - English Cocker		2	Medium	M	2011-03-27	FALSE	FALSE
7541	5408	2016-11-05	87	380	2660	7	7.28767	middle-aged	4.15	6	6	4.26	TRUE	Yes	38	Beagle		2	Medium	M	2009-07-25	FALSE	TRUE
7546	5411	2016-11-05	12	56.1429	393	1	1.07671	young	2.55	4.86	5.36	3.26	FALSE	Yes	170	King Charles Spaniel (Standard)		1	Small	F	2015-10-09	FALSE	FALSE
7548	2697	2016-11-05	26	116.143	813	2	2.2274	young	4.15	5.39	5.36	4.26	FALSE	Yes	136	Retriever - Golden		3	Large	F	2014-08-15	FALSE	FALSE
7528	5397	2016-11-04	19	85.8571	601	1	1.64658	young	4.07	6	6	4.26	FALSE	Yes	177	Retriever - Labrador		3	Large	M	2015-03-14	FALSE	TRUE
7529	5398	2016-11-04	112	488.857	3422	9	9.37534	old	3.57	6	5.9	4.26	TRUE	Yes	177	Retriever - Labrador		3	Large	M	2007-06-23	FALSE	FALSE
7532	5400	2016-11-04	37	164.571	1152	3	3.15616	young	3.55	5.39	6	3.72	FALSE	Yes	95	Cockapoo / Cockerpoo / Spoodle (X Spaniel/Poodle)		2	Medium	M	2013-09-09	FALSE	FALSE
7515	1133	2016-11-03	38	166.857	1168	3	3.2	young	4.15	6	6	4.26	FALSE	Yes	96	Spaniel - English Cocker		2	Medium	M	2013-08-23	FALSE	FALSE
7516	1134	2016-11-03	58	256.429	1795	4	4.91781	middle-aged	4.15	6	6	4.26	FALSE	Yes	274	Spaniel - English Springer		2	Medium	M	2011-12-05	FALSE	FALSE
7521	4029	2016-11-03	80	349.857	2449	6	6.70959	middle-aged	3.84	5.82	6	3.14	FALSE	Yes	136	Retriever - Golden		3	Large	M	2010-02-19	FALSE	FALSE
7522	4399	2016-11-03	8	38.8571	272	0	0.745205	young	4.09	6	5.89	3.39	FALSE	Yes	4	Mixed (Small)		1	Small	M	2016-02-05	FALSE	FALSE
7526	5395	2016-11-03	23	102.714	719	1	1.96986	young	3.63	6	6	4.26	FALSE	Yes	5	Mixed (Medium)		2	Medium	F	2014-11-15	FALSE	FALSE
7512	5392	2016-11-02	25	111	777	2	2.12877	young	2.92	5.24	4.14	1.55	FALSE	Yes	265	Husky - Siberian		3	Large	F	2014-09-17	FALSE	FALSE
7513	5393	2016-11-02	44	192.857	1350	3	3.69863	young	2.49	4.23	5.06	3.3	FALSE	Yes	265	Husky - Siberian		3	Large	M	2013-02-21	FALSE	TRUE
7484	5375	2016-10-28	23	100.143	701	1	1.92055	young	3.61	5.39	4.48	3.19	FALSE	Yes	303	West Highland White Terrier		1	Small	M	2014-11-27	FALSE	FALSE
7488	2173	2016-10-28	102	444.286	3110	8	8.52055	old	4.15	6	6	2.4	TRUE	Yes	87	Chihuahua - Smooth Coat		1	Small	F	2008-04-23	FALSE	FALSE
7479	4505	2016-10-27	17	74.7143	523	1	1.43288	young	4.15	6	5.01	3.8	FALSE	Yes	98	Collie - Rough Coat		2	Medium	M	2015-05-23	FALSE	FALSE
7480	5372	2016-10-27	13	60.2857	422	1	1.15616	young	3.92	6	5.89	4.26	FALSE	Yes	38	Beagle		2	Medium	F	2015-09-01	FALSE	FALSE
7482	5374	2016-10-27	15	65.7143	460	1	1.26027	young	3.45	6	6	4.26	FALSE	Yes	6	Mixed (Large)		3	Large	M	2015-07-25	FALSE	FALSE
7476	5366	2016-10-26	26	116.286	814	2	2.23014	young	3.99	6	6	3.97	FALSE	Yes	64	Boxer		3	Large	F	2014-08-04	FALSE	TRUE
7468	5362	2016-10-25	67	294.857	2064	5	5.65479	middle-aged	2.86	5.63	5.8	4.26	FALSE	Ja	101	Cross Breed (Unknown X )/ Mongrel		4	Extra Large	F	2011-03-02	FALSE	FALSE
7470	4202	2016-10-25	63	277.286	1941	5	5.31781	middle-aged	3.59	6	5.9	3.72	FALSE	Yes	199	Schnauzer (Miniature)		1	Small	M	2011-07-03	FALSE	FALSE
7471	5364	2016-10-25	155	675.143	4726	12	12.9479	old	2.75	5.34	4.62	3.38	TRUE	Yes	5	Mixed (Medium)		2	Medium	F	2003-11-17	FALSE	FALSE
7464	5359	2016-10-24	32	140.429	983	2	2.69315	young	3.02	5.39	4.64	3.72	FALSE	Yes	177	Retriever - Labrador		3	Large	F	2014-02-14	FALSE	FALSE
7465	3206	2016-10-24	60	262	1834	5	5.02466	middle-aged	3.59	6	5.81	3.55	FALSE	Yes	274	Spaniel - English Springer		2	Medium	M	2011-10-17	FALSE	FALSE
7467	5360	2016-10-24	53	232	1624	4	4.44932	middle-aged	3.51	5.55	5.8	4.01	FALSE	Yes	231	Pug		1	Small	F	2012-05-14	FALSE	FALSE
7453	5354	2016-10-22	59	260.571	1824	4	4.99726	middle-aged	4.15	6	6	4.26	FALSE	Yes	163	Jack/Parson Russell Terrier		1	Small	F	2011-10-25	FALSE	FALSE
7454	5355	2016-10-22	3	17.2857	121	0	0.331507	young	3.73	5.72	5.63	1.77	FALSE	Yes	128	German Shepherd / Alsatian		3	Large	M	2016-06-23	FALSE	FALSE
7449	5351	2016-10-21	35	154.857	1084	2	2.96986	young	4.15	6	6	4.01	FALSE	Yes	176	Labradoodle (X Labrador/Poodle)		3	Large	F	2013-11-02	FALSE	FALSE
7438	5345	2016-10-20	120	521.857	3653	10	10.0082	old	3.35	5.26	4.3	3.67	TRUE	Ja	177	Retriever - Labrador		3	Large	M	2006-10-20	FALSE	FALSE
7447	5348	2016-10-20	80	348.571	2440	6	6.68493	middle-aged	3.49	5.63	5.24	3.42	FALSE	Ja	163	Jack/Parson Russell Terrier		1	Small	M	2010-02-14	FALSE	FALSE
7433	4653	2016-10-19	124	539.857	3779	10	10.3534	old	3.36	5.61	5.32	3.55	TRUE	Yes	177	Retriever - Labrador		3	Large	F	2006-06-15	FALSE	FALSE
7435	5343	2016-10-19	7	30.8571	216	0	0.591781	young	4.01	5	6	2.9	FALSE	Ja	177	Retriever - Labrador		3	Large	M	2016-03-17	FALSE	FALSE
7425	4504	2016-10-18	42	183.571	1285	3	3.52055	young	3.2	5.6	4.78	3.55	FALSE	Yes	98	Collie - Rough Coat		2	Medium	F	2013-04-12	FALSE	FALSE
7411	5337	2016-10-17	76	331.286	2319	6	6.35342	middle-aged	4.08	6	6	4.26	FALSE	Yes	96	Spaniel - English Cocker		2	Medium	M	2010-06-12	FALSE	FALSE
7412	5338	2016-10-17	82	359.286	2515	6	6.89041	middle-aged	3.92	4.87	5.81	2.97	TRUE	Yes	163	Jack/Parson Russell Terrier		1	Small	F	2009-11-28	FALSE	TRUE
7418	2539	2016-10-17	53	232.571	1628	4	4.46027	middle-aged	4.15	6	5.12	4.26	FALSE	Yes	82	King Charles Spaniel - Cavalier		1	Small	F	2012-05-03	FALSE	FALSE
7407	5334	2016-10-16	38	166.714	1167	3	3.19726	young	3.81	6	5.91	3.06	FALSE	Yes	60	Border Terrier		1	Small	F	2013-08-06	FALSE	FALSE
7408	5335	2016-10-16	133	582.429	4077	11	11.1699	old	2.44	3.31	4.09	2.67	TRUE	Yes	309	Yorkshire Terrier		1	Small	F	2005-08-18	FALSE	FALSE
7404	5332	2016-10-15	14	64.4286	451	1	1.23562	young	3.26	5.91	5.27	3.22	FALSE	Yes	177	Retriever - Labrador		3	Large	F	2015-07-22	FALSE	FALSE
7405	5333	2016-10-15	14	64.4286	451	1	1.23562	young	4.15	6	6	4.26	FALSE	Yes	177	Retriever - Labrador		3	Large	F	2015-07-22	FALSE	FALSE
7406	4733	2016-10-15	8	37.8571	265	0	0.726027	young	4.03	5.32	6	3.48	FALSE	Yes	52	Bichon Frise		1	Small	F	2016-01-24	FALSE	FALSE
7396	5327	2016-10-14	25	112.429	787	2	2.15616	young	4.09	5.19	5.09	4.26	FALSE	Yes	96	Spaniel - English Cocker		2	Medium	M	2014-08-19	FALSE	FALSE
7397	5328	2016-10-14	26	115.429	808	2	2.2137	young	4.06	6	6	4.26	FALSE	Yes	231	Pug		1	Small	M	2014-07-29	FALSE	FALSE
7398	5329	2016-10-14	132	575.143	4026	11	11.0301	old	2.54	5.55	5.37	2.97	TRUE	Yes	261	Shih Tzu		1	Small	M	2005-10-06	FALSE	FALSE
7384	4475	2016-10-13	159	692.429	4847	13	13.2795	old	3.64	6	5.8	3.72	TRUE	Yes	59	Border Collie		2	Medium	M	2003-07-07	FALSE	FALSE
7388	5325	2016-10-13	34	149.571	1047	2	2.86849	young	4.15	6	5.36	4.26	FALSE	Yes	101	Cross Breed (Unknown X )/ Mongrel		4	Extra Large	M	2013-12-01	FALSE	FALSE
7374	5321	2016-10-12	141	614.571	4302	11	11.7863	old	3.98	6	6	3.72	TRUE	Yes	82	King Charles Spaniel - Cavalier		1	Small	F	2005-01-01	FALSE	FALSE
7376	4734	2016-10-12	65	285.429	1998	5	5.47397	middle-aged	4.01	5.91	5.9	4.26	FALSE	Yes	231	Pug		1	Small	F	2011-04-24	FALSE	FALSE
7378	4128	2016-10-12	51	223.286	1563	4	4.28219	middle-aged	3.96	6	6	4.26	FALSE	Yes	52	Bichon Frise		1	Small	F	2012-07-02	FALSE	FALSE
7379	5322	2016-10-12	68	298.286	2088	5	5.72055	middle-aged	4.15	5.39	6	3.68	FALSE	Yes	163	Jack/Parson Russell Terrier		1	Small	M	2011-01-24	FALSE	FALSE
7363	5317	2016-10-11	23	102.143	715	1	1.9589	young	3.11	6	5.72	2.48	FALSE	Yes	103	Dachshund (Standard)		2	Medium	F	2014-10-27	FALSE	FALSE
7372	3134	2016-10-11	18	79.7143	558	1	1.52877	young	4.03	5.9	5.81	2.68	FALSE	Yes	204	Newfoundland		4	Extra Large	M	2015-04-02	FALSE	FALSE
7355	3683	2016-10-10	41	179.143	1254	3	3.43562	young	3.79	6	5.41	4.26	FALSE	Yes	98	Collie - Rough Coat		2	Medium	M	2013-05-05	FALSE	FALSE
7356	5314	2016-10-10	124	542.286	3796	10	10.4	old	2.81	6	5.52	4.09	TRUE	Yes	103	Dachshund (Standard)		2	Medium	F	2006-05-20	FALSE	FALSE
7357	4800	2016-10-10	119	519	3633	9	9.95342	old	3.13	4.47	5.22	3.55	TRUE	Yes	163	Jack/Parson Russell Terrier		1	Small	M	2006-10-30	FALSE	FALSE
7362	5316	2016-10-10	12	54.5714	382	1	1.04658	young	4.09	6	6	4.26	FALSE	Yes	96	Spaniel - English Cocker		2	Medium	F	2015-09-24	FALSE	FALSE
7346	2543	2016-10-09	25	109	763	2	2.09041	young	3.34	5.92	6	3.19	FALSE	Yes	59	Border Collie		2	Medium	F	2014-09-07	FALSE	FALSE
7348	4135	2016-10-09	29	127.143	890	2	2.43836	young	4.09	6	6	3.1	FALSE	Yes	95	Cockapoo / Cockerpoo / Spoodle (X Spaniel/Poodle)		2	Medium	M	2014-05-03	FALSE	FALSE
7349	4136	2016-10-09	38	165.429	1158	3	3.1726	young	4.03	6	5.9	2.65	FALSE	Yes	95	Cockapoo / Cockerpoo / Spoodle (X Spaniel/Poodle)		2	Medium	M	2013-08-08	FALSE	FALSE
7350	1113	2016-10-09	103	448.571	3140	8	8.60274	old	4.01	6	6	4.26	TRUE	Yes	284	Bull Terrier - Staffordshire		2	Medium	F	2008-03-05	FALSE	FALSE
7341	4656	2016-10-08	9	41.5714	291	0	0.79726	young	4.15	6	6	4.26	FALSE	Yes	177	Retriever - Labrador		3	Large	F	2015-12-22	FALSE	FALSE
7344	5312	2016-10-08	11	52.1429	365	0	1	young	3.87	6	5.9	3.97	FALSE	Yes	82	King Charles Spaniel - Cavalier		1	Small	F	2015-10-09	FALSE	FALSE
7338	3930	2016-10-07	164	715	5005	13	13.7123	old	3.34	5.23	5.07	3.55	TRUE	Yes	60	Border Terrier		1	Small	M	2003-01-24	FALSE	TRUE
7333	4751	2016-10-06	17	75.2857	527	1	1.44384	young	3.59	5.42	5.9	3.72	FALSE	Yes	177	Retriever - Labrador		3	Large	M	2015-04-28	FALSE	FALSE
7335	5307	2016-10-06	40	175.857	1231	3	3.3726	young	2.75	5.06	5.8	2.61	FALSE	Yes	156	Setter - Irish		3	Large	F	2013-05-24	FALSE	TRUE
7331	5303	2016-10-05	50	217.714	1524	4	4.17534	middle-aged	3.49	6	5.81	3.55	FALSE	Yes	163	Jack/Parson Russell Terrier		1	Small	M	2012-08-03	FALSE	TRUE
7320	5298	2016-10-04	3	16.7143	117	0	0.320548	young	3.77	4.82	3.72	3.97	FALSE	Yes	95	Cockapoo / Cockerpoo / Spoodle (X Spaniel/Poodle)		2	Medium	M	2016-06-09	FALSE	FALSE
7311	4776	2016-10-03	134	584.286	4090	11	11.2055	old	3.6	5.9	5.9	3.97	TRUE	Yes	101	Cross Breed (Unknown X )/ Mongrel		4	Extra Large	M	2005-07-23	FALSE	FALSE
7312	5296	2016-10-03	26	117.429	822	2	2.25205	young	3.62	5.82	5.62	2.01	FALSE	Yes	177	Retriever - Labrador		3	Large	M	2014-07-04	FALSE	FALSE
7299	3977	2016-10-02	22	99.8571	699	1	1.91507	young	3.77	6	6	3.97	FALSE	Yes	284	Bull Terrier - Staffordshire		2	Medium	F	2014-11-03	FALSE	FALSE
7303	4724	2016-10-02	96	418	2926	8	8.01644	old	3.31	5.36	5.57	4.26	TRUE	Yes	221	Pointer - English		3	Large	M	2008-09-28	FALSE	FALSE
7288	5287	2016-10-01	16	69.8571	489	1	1.33973	young	4.09	6	5.9	4.26	FALSE	Yes	103	Dachshund (Standard)		2	Medium	M	2015-05-31	FALSE	FALSE
7292	5289	2016-10-01	111	486.714	3407	9	9.33425	old	2.6	4.75	4.39	2.84	TRUE	Yes	199	Schnauzer (Miniature)		1	Small	F	2007-06-04	FALSE	FALSE
7295	5291	2016-10-01	108	470.143	3291	9	9.01644	old	3.03	5.31	5.7	2.49	TRUE	Yes	163	Jack/Parson Russell Terrier		1	Small	F	2007-09-28	FALSE	FALSE
7279	2689	2016-09-30	73	319.143	2234	6	6.12055	middle-aged	4.07	6	6	4.26	FALSE	Yes	211	Old English Sheepdog		3	Large	M	2010-08-19	FALSE	TRUE
7281	5283	2016-09-30	77	337.571	2363	6	6.47397	middle-aged	3.37	4.79	5	3.84	FALSE	Yes	64	Boxer		3	Large	M	2010-04-12	FALSE	TRUE
7282	4735	2016-09-30	29	127.286	891	2	2.4411	young	3.98	6	6	4.26	FALSE	Yes	177	Retriever - Labrador		3	Large	M	2014-04-23	FALSE	FALSE
7283	5284	2016-09-30	138	602.571	4218	11	11.5562	old	3.08	5.72	4.8	3.72	TRUE	Yes	38	Beagle		2	Medium	F	2005-03-14	FALSE	FALSE
7284	5285	2016-09-30	79	347.286	2431	6	6.66027	middle-aged	3.63	5.39	6	4.26	FALSE	Yes	177	Retriever - Labrador		3	Large	M	2010-02-03	FALSE	TRUE
7285	4746	2016-09-30	73	319	2233	6	6.11781	middle-aged	3.99	5.39	6	3.39	FALSE	Yes	6	Mixed (Large)		3	Large	M	2010-08-20	FALSE	FALSE
7269	3586	2016-09-29	13	56.8571	398	1	1.09041	young	3.95	6	5.9	4.26	FALSE	Yes	177	Retriever - Labrador		3	Large	M	2015-08-28	FALSE	FALSE
7270	4025	2016-09-29	9	40.8571	286	0	0.783562	young	3.95	6	5.37	2.68	FALSE	Yes	4	Mixed (Small)		1	Small	M	2015-12-18	FALSE	FALSE
7274	5281	2016-09-29	16	73.2857	513	1	1.40548	young	4.06	6	5.47	0.58	FALSE	Yes	96	Spaniel - English Cocker		2	Medium	M	2015-05-05	FALSE	FALSE
7275	4754	2016-09-29	14	64.8571	454	1	1.24384	young	4.08	5.39	6	3.68	FALSE	Yes	101	Cross Breed (Unknown X )/ Mongrel		4	Extra Large	F	2015-07-03	FALSE	FALSE
7253	5272	2016-09-28	31	135.286	947	2	2.59452	young	2.92	5.9	5.91	3.01	FALSE	Yes	59	Border Collie		2	Medium	M	2014-02-24	FALSE	FALSE
7254	5273	2016-09-28	5	22	154	0	0.421918	young	4.03	5.39	6	4.01	FALSE	Yes	59	Border Collie		2	Medium	M	2016-04-27	FALSE	FALSE
7255	5274	2016-09-28	15	66.2857	464	1	1.27123	young	4.15	6	6	4.26	FALSE	Yes	59	Border Collie		2	Medium	F	2015-06-22	FALSE	FALSE
7256	5275	2016-09-28	96	417.429	2922	8	8.00548	old	3.02	5.82	5.42	4.26	TRUE	Yes	5	Mixed (Medium)		2	Medium	F	2008-09-28	FALSE	FALSE
7257	5276	2016-09-28	67	292.857	2050	5	5.61644	middle-aged	3.31	5.54	5.36	3.84	FALSE	Yes	13	Malamute - Alaskan		4	Extra Large	F	2011-02-17	FALSE	FALSE
7258	5277	2016-09-28	45	196.286	1374	3	3.76438	young	3.81	6	5.91	3.8	FALSE	Yes	101	Cross Breed (Unknown X )/ Mongrel		4	Extra Large	F	2012-12-24	FALSE	FALSE
7259	5278	2016-09-28	80	350.429	2453	6	6.72055	middle-aged	2.71	5.35	3.93	1.78	FALSE	Yes	101	Cross Breed (Unknown X )/ Mongrel		4	Extra Large	M	2010-01-10	FALSE	FALSE
7260	5279	2016-09-28	129	561.857	3933	10	10.7753	old	2.73	5.15	5.3	2.84	TRUE	Yes	4	Mixed (Small)		1	Small	M	2005-12-22	FALSE	FALSE
7263	4203	2016-09-28	40	177.714	1244	3	3.40822	young	3.59	6	5.81	3.55	FALSE	Yes	199	Schnauzer (Miniature)		1	Small	F	2013-05-03	FALSE	TRUE
7264	3092	2016-09-28	27	118.857	832	2	2.27945	young	3.77	5.91	6	3.72	FALSE	Yes	284	Bull Terrier - Staffordshire		2	Medium	M	2014-06-19	FALSE	FALSE
7267	4645	2016-09-28	92	403.857	2827	7	7.74521	middle-aged	3.14	5.34	5.59	3.3	TRUE	Yes	96	Spaniel - English Cocker		2	Medium	F	2009-01-01	FALSE	FALSE
7244	5265	2016-09-27	52	227.286	1591	4	4.3589	middle-aged	3.52	5.83	5.9	2.27	FALSE	Yes	177	Retriever - Labrador		3	Large	F	2012-05-20	FALSE	FALSE
7245	5266	2016-09-27	4	18	126	0	0.345205	young	4.15	6	6	4.26	FALSE	Yes	177	Retriever - Labrador		3	Large	F	2016-05-24	FALSE	FALSE
7246	1324	2016-09-27	23	103.571	725	1	1.9863	young	4.15	6	6	3.97	FALSE	Yes	128	German Shepherd / Alsatian		3	Large	F	2014-10-03	FALSE	FALSE
7250	5270	2016-09-27	55	240.429	1683	4	4.61096	middle-aged	3.94	6	5.9	3.19	FALSE	Yes	274	Spaniel - English Springer		2	Medium	F	2012-02-18	FALSE	FALSE
7238	5263	2016-09-26	106	463.714	3246	8	8.89315	old	3.4	5.53	4.52	1.54	TRUE	Yes	103	Dachshund (Standard)		2	Medium	M	2007-11-07	FALSE	FALSE
7226	4665	2016-09-25	67	292.857	2050	5	5.61644	middle-aged	3.56	5.43	4.64	0.96	FALSE	Yes	309	Yorkshire Terrier		1	Small	M	2011-02-14	FALSE	FALSE
7212	1279	2016-09-24	50	217.714	1524	4	4.17534	middle-aged	4.01	6	5.9	4.26	FALSE	Yes	96	Spaniel - English Cocker		2	Medium	M	2012-07-23	FALSE	FALSE
7214	1336	2016-09-24	90	392.286	2746	7	7.52329	middle-aged	4.15	6	6	4.26	TRUE	Yes	261	Shih Tzu		1	Small	F	2009-03-19	FALSE	FALSE
7216	1073	2016-09-24	61	267.857	1875	5	5.13699	middle-aged	4.15	6	6	4.26	FALSE	Yes	60	Border Terrier		1	Small	M	2011-08-07	FALSE	FALSE
7217	5253	2016-09-24	76	333.429	2334	6	6.39452	middle-aged	4.15	4.31	4.44	3.22	FALSE	Yes	275	Spaniel - Field		2	Medium	M	2010-05-05	FALSE	FALSE
7218	5254	2016-09-24	9	43.1429	302	0	0.827397	young	4.09	6	6	4.26	FALSE	Yes	177	Retriever - Labrador		3	Large	M	2015-11-27	FALSE	FALSE
7221	3038	2016-09-24	94	411.857	2883	7	7.89863	middle-aged	4.15	6	6	3.97	TRUE	Yes	101	Cross Breed (Unknown X )/ Mongrel		4	Extra Large	M	2008-11-02	FALSE	FALSE
7204	4761	2016-09-23	16	71.7143	502	1	1.37534	young	3.81	6	5.91	2.48	FALSE	Yes	121	Fox Terrier - Smooth		2	Medium	M	2015-05-10	FALSE	FALSE
7206	1082	2016-09-23	115	502.571	3518	9	9.63836	old	3.98	6	6	4.26	TRUE	Yes	4	Mixed (Small)		1	Small	F	2007-02-05	FALSE	FALSE
7208	5249	2016-09-23	36	159	1113	3	3.04932	young	3.99	6	5.87	4.26	FALSE	Yes	246	Rottweiler		3	Large	F	2013-09-06	FALSE	FALSE
7211	5250	2016-09-23	7	32.1429	225	0	0.616438	young	4.15	6	6	3.39	FALSE	Yes	274	Spaniel - English Springer		2	Medium	M	2016-02-11	FALSE	FALSE
7189	5240	2016-09-22	50	220.571	1544	4	4.23014	middle-aged	4.09	6	5.9	3.14	FALSE	Yes	309	Yorkshire Terrier		1	Small	M	2012-07-01	FALSE	FALSE
7192	5241	2016-09-22	96	417.429	2922	8	8.00548	old	4.15	6	5.85	4.26	TRUE	Yes	177	Retriever - Labrador		3	Large	F	2008-09-22	FALSE	FALSE
7196	4711	2016-09-22	105	459.429	3216	8	8.81096	old	2.47	4.76	4.26	2.84	TRUE	Yes	177	Retriever - Labrador		3	Large	F	2007-12-03	FALSE	FALSE
7197	4692	2016-09-22	14	63.4286	444	1	1.21644	young	4.07	6	6	3.97	FALSE	Yes	5	Mixed (Medium)		2	Medium	M	2015-07-06	FALSE	FALSE
7199	5243	2016-09-22	61	269.286	1885	5	5.16438	middle-aged	3.59	6	5.81	3.55	FALSE	Yes	129	German Pointer- Shorthaired		3	Large	M	2011-07-26	FALSE	FALSE
7184	4130	2016-09-21	10	46.8571	328	0	0.89863	young	4.15	6	6	3.1	FALSE	Yes	70	Bull Terrier (Standard)		2	Medium	F	2015-10-29	FALSE	FALSE
7179	3849	2016-09-20	10	47.2857	331	0	0.906849	young	3.91	6	5.47	3.72	FALSE	Yes	101	Cross Breed (Unknown X )/ Mongrel		4	Extra Large	M	2015-10-25	FALSE	FALSE
7144	5228	2016-09-19	89	388.429	2719	7	7.44932	middle-aged	4.06	6	6	4.26	TRUE	Yes	284	Bull Terrier - Staffordshire		2	Medium	F	2009-04-10	FALSE	FALSE
7145	5229	2016-09-19	54	237.571	1663	4	4.55616	middle-aged	4.15	6	6	4.26	FALSE	Yes	163	Jack/Parson Russell Terrier		1	Small	F	2012-03-01	FALSE	FALSE
7149	4250	2016-09-19	29	129.857	909	2	2.49041	young	3.79	6	5.41	4.26	FALSE	Yes	5	Mixed (Medium)		2	Medium	F	2014-03-25	FALSE	TRUE
7150	5232	2016-09-19	17	74.5714	522	1	1.43014	young	3.63	6	5.9	4.26	FALSE	Yes	128	German Shepherd / Alsatian		3	Large	M	2015-04-16	FALSE	FALSE
7151	4635	2016-09-19	37	162	1134	3	3.10685	young	4.15	6	6	2.16	FALSE	Yes	101	Cross Breed (Unknown X )/ Mongrel		4	Extra Large	F	2013-08-12	FALSE	FALSE
7157	5234	2016-09-19	126	549.143	3844	10	10.5315	old	3.57	5.11	5.36	3.55	TRUE	Yes	101	Cross Breed (Unknown X )/ Mongrel		4	Extra Large	M	2006-03-12	FALSE	FALSE
7129	5223	2016-09-18	15	66.7143	467	1	1.27945	young	3.71	6	5.22	3.22	FALSE	Yes	128	German Shepherd / Alsatian		3	Large	F	2015-06-09	FALSE	FALSE
7130	4558	2016-09-18	27	118.857	832	2	2.27945	young	4.15	6	6	2.78	FALSE	Yes	128	German Shepherd / Alsatian		3	Large	M	2014-06-09	FALSE	FALSE
7139	4115	2016-09-18	160	698.571	4890	13	13.3973	old	2.72	5.21	5.8	4.26	TRUE	Yes	101	Cross Breed (Unknown X )/ Mongrel		4	Extra Large	F	2003-04-30	FALSE	TRUE
7122	4638	2016-09-17	17	76.2857	534	1	1.46301	young	3.92	6	6	3.97	FALSE	Yes	59	Border Collie		2	Medium	F	2015-04-02	FALSE	FALSE
7123	5220	2016-09-17	3	16.4286	115	0	0.315068	young	3.92	5.37	6	4.26	FALSE	Yes	303	West Highland White Terrier		1	Small	M	2016-05-25	FALSE	FALSE
7116	5217	2016-09-16	15	67	469	1	1.28493	young	3.94	6	5.9	3.14	FALSE	Yes	5	Mixed (Medium)		2	Medium	F	2015-06-05	FALSE	FALSE
7117	5218	2016-09-16	19	84.4286	591	1	1.61918	young	3.16	6	4.82	2.65	FALSE	Yes	101	Cross Breed (Unknown X )/ Mongrel		4	Extra Large	F	2015-02-03	FALSE	FALSE
7114	4641	2016-09-15	152	664.429	4651	12	12.7425	old	3.4	5.44	5.8	3.8	TRUE	Yes	96	Spaniel - English Cocker		2	Medium	F	2003-12-22	FALSE	TRUE
7115	5216	2016-09-15	69	300.571	2104	5	5.76438	middle-aged	3.49	5.9	5.59	3.84	FALSE	Yes	64	Boxer		3	Large	M	2010-12-12	FALSE	FALSE
7106	5214	2016-09-14	24	107.857	755	2	2.06849	young	3.69	5.72	5.91	3.8	FALSE	Yes	95	Cockapoo / Cockerpoo / Spoodle (X Spaniel/Poodle)		2	Medium	M	2014-08-21	FALSE	FALSE
7092	3224	2016-09-13	75	329	2303	6	6.30959	middle-aged	2.96	2.26	3.89	4.26	FALSE	Yes	74	Cairn Terrier		1	Small	M	2010-05-25	FALSE	FALSE
7093	3223	2016-09-13	75	329	2303	6	6.30959	middle-aged	3.53	1.98	3.29	4.26	FALSE	Yes	74	Cairn Terrier		1	Small	M	2010-05-25	FALSE	FALSE
7095	4612	2016-09-13	57	251.286	1759	4	4.81918	middle-aged	3.59	5.7	6	1.91	FALSE	Yes	265	Husky - Siberian		3	Large	M	2011-11-20	FALSE	FALSE
7096	4611	2016-09-13	60	263.714	1846	5	5.05753	middle-aged	2.91	5.45	5.1	3.97	FALSE	Yes	13	Malamute - Alaskan		4	Extra Large	M	2011-08-25	FALSE	FALSE
7102	4495	2016-09-13	118	515	3605	9	9.87671	old	3.34	5.8	4.16	4.26	TRUE	Yes	177	Retriever - Labrador		3	Large	F	2006-10-31	FALSE	FALSE
7077	4485	2016-09-12	116	506	3542	9	9.70411	old	1.82	4.61	2.23	3.91	TRUE	Yes	176	Labradoodle (X Labrador/Poodle)		3	Large	M	2007-01-01	FALSE	FALSE
7071	5201	2016-09-11	8	36.5714	256	0	0.70137	young	4.08	6	5.41	3.55	FALSE	Yes	132	German Pointer - Wirehaired		3	Large	F	2015-12-30	FALSE	FALSE
7075	5203	2016-09-11	158	691.429	4840	13	13.2603	old	1.81	5.55	4.76	0.67	TRUE	Yes	284	Bull Terrier - Staffordshire		2	Medium	F	2003-06-12	FALSE	TRUE
7058	5195	2016-09-10	83	362.429	2537	6	6.95068	middle-aged	4.15	6	5.47	1.07	TRUE	Yes	226	Poodle (Toy)		1	Small	M	2009-09-30	FALSE	TRUE
7059	4593	2016-09-10	59	257.857	1805	4	4.94521	middle-aged	4.15	5.37	6	4.26	FALSE	Yes	128	German Shepherd / Alsatian		3	Large	M	2011-10-02	FALSE	FALSE
7061	4392	2016-09-10	7	34.5714	242	0	0.663014	young	4.15	6	4.7	3.72	FALSE	Yes	95	Cockapoo / Cockerpoo / Spoodle (X Spaniel/Poodle)		2	Medium	M	2016-01-12	FALSE	FALSE
7064	4583	2016-09-10	9	41.1429	288	0	0.789041	young	3.63	5.91	5.9	3.39	FALSE	Yes	177	Retriever - Labrador		3	Large	M	2015-11-27	FALSE	FALSE
7065	5196	2016-09-10	5	22	154	0	0.421918	young	4.07	6	6	1.62	FALSE	Yes	95	Cockapoo / Cockerpoo / Spoodle (X Spaniel/Poodle)		2	Medium	F	2016-04-09	FALSE	FALSE
7066	5197	2016-09-10	5	25.2857	177	0	0.484932	young	4.15	5.48	6	4.26	FALSE	Yes	95	Cockapoo / Cockerpoo / Spoodle (X Spaniel/Poodle)		2	Medium	F	2016-03-17	FALSE	FALSE
7067	5198	2016-09-10	27	120.286	842	2	2.30685	young	3.68	6	5.9	4.26	FALSE	Yes	231	Pug		1	Small	M	2014-05-22	FALSE	FALSE
7053	4663	2016-09-09	6	26.8571	188	0	0.515068	young	4.15	6	6	4.26	FALSE	Yes	261	Shih Tzu		1	Small	F	2016-03-05	FALSE	FALSE
7056	1771	2016-09-09	34	149.857	1049	2	2.87397	young	3.27	5.91	5.9	4.26	FALSE	Yes	95	Cockapoo / Cockerpoo / Spoodle (X Spaniel/Poodle)		2	Medium	F	2013-10-26	FALSE	FALSE
7043	5174	2016-09-08	55	241.429	1690	4	4.63014	middle-aged	3.25	5.54	5.48	3.55	FALSE	Yes	144	Greyhound		3	Large	F	2012-01-23	FALSE	FALSE
7048	5178	2016-09-08	69	304	2128	5	5.83014	middle-aged	3.95	5.9	4.79	4.09	FALSE	Yes	5	Mixed (Medium)		2	Medium	M	2010-11-11	FALSE	FALSE
7052	5183	2016-09-08	30	133.857	937	2	2.56712	young	4.09	6	5.9	3.72	FALSE	Yes	221	Pointer - English		3	Large	F	2014-02-14	FALSE	FALSE
7040	5171	2016-09-07	52	226.857	1588	4	4.35068	middle-aged	3.89	6	5.36	4.26	FALSE	Yes	5	Mixed (Medium)		2	Medium	M	2012-05-03	FALSE	FALSE
7041	5172	2016-09-07	14	62	434	1	1.18904	young	4.15	6	6	4.26	FALSE	Yes	303	West Highland White Terrier		1	Small	M	2015-07-01	FALSE	FALSE
7022	5163	2016-09-06	137	599.714	4198	11	11.5014	old	3.71	6	5.41	3.84	TRUE	Yes	284	Bull Terrier - Staffordshire		2	Medium	F	2005-03-10	FALSE	FALSE
7024	4486	2016-09-06	14	62.7143	439	1	1.20274	young	3.63	6	6	3.39	FALSE	Yes	59	Border Collie		2	Medium	F	2015-06-25	FALSE	TRUE
7033	5167	2016-09-06	86	374.429	2621	7	7.18082	middle-aged	3.23	5.72	5.63	0.81	TRUE	Yes	5	Mixed (Medium)		2	Medium	M	2009-07-04	FALSE	FALSE
7035	5168	2016-09-06	16	72.4286	507	1	1.38904	young	3.81	5.9	5.91	3.01	FALSE	Yes	221	Pointer - English		3	Large	F	2015-04-18	FALSE	FALSE
7006	2129	2016-09-04	47	205.286	1437	3	3.93699	young	3.48	6	5.9	3.19	FALSE	Yes	309	Yorkshire Terrier		1	Small	F	2012-09-28	FALSE	FALSE
7007	3709	2016-09-04	13	58	406	1	1.11233	young	4.15	5.41	6	4.26	FALSE	Yes	2	Other (Medium)		2	Medium	F	2015-07-26	FALSE	FALSE
7003	5148	2016-09-03	9	40.1429	281	0	0.769863	young	4.15	5.91	6	4.26	FALSE	Yes	101	Cross Breed (Unknown X )/ Mongrel		4	Extra Large	M	2015-11-27	FALSE	FALSE
6994	4576	2016-09-02	110	482.714	3379	9	9.25753	old	3.43	5.91	5.24	4.09	TRUE	Yes	86	Chihuahua - Long Coat		1	Small	M	2007-06-03	FALSE	FALSE
6995	4575	2016-09-02	52	229	1603	4	4.39178	middle-aged	4.15	6	6	4.26	FALSE	Yes	4	Mixed (Small)		1	Small	M	2012-04-13	FALSE	FALSE
6997	3596	2016-09-02	13	57	399	1	1.09315	young	3.51	6	5.56	3.39	FALSE	Yes	284	Bull Terrier - Staffordshire		2	Medium	M	2015-07-31	FALSE	FALSE
6998	4547	2016-09-02	8	35.2857	247	0	0.676712	young	4.15	6	6	4.26	FALSE	Yes	59	Border Collie		2	Medium	F	2015-12-30	FALSE	FALSE
6999	5146	2016-09-02	9	41.4286	290	0	0.794521	young	2.99	6	4.91	3.03	FALSE	Yes	96	Spaniel - English Cocker		2	Medium	F	2015-11-17	FALSE	FALSE
7000	4715	2016-09-02	5	22.2857	156	0	0.427397	young	3.6	6	5.08	4.26	FALSE	Yes	231	Pug		1	Small	F	2016-03-30	FALSE	FALSE
6978	5136	2016-09-01	99	430.571	3014	8	8.25753	old	2.83	5.81	5.44	1.94	TRUE	Yes	5	Mixed (Medium)		2	Medium	M	2008-06-01	FALSE	FALSE
6982	5140	2016-09-01	11	51	357	0	0.978082	young	3.5	5.81	6	3.43	FALSE	Yes	152	Hungarian Vizsla		3	Large	F	2015-09-10	FALSE	FALSE
6969	5130	2016-08-31	55	243	1701	4	4.66027	middle-aged	3.24	5.31	4.77	3.26	FALSE	Yes	177	Retriever - Labrador		3	Large	M	2012-01-04	FALSE	TRUE
6970	5131	2016-08-31	81	355	2485	6	6.80822	middle-aged	3.01	5.06	5.27	2.44	TRUE	Yes	6	Mixed (Large)		3	Large	M	2009-11-11	FALSE	FALSE
6975	5134	2016-08-31	25	109.857	769	2	2.10685	young	3.48	5.3	5.9	4.26	FALSE	Yes	1	Other (Small)		1	Small	M	2014-07-24	FALSE	FALSE
6954	5117	2016-08-30	27	120.571	844	2	2.31233	young	3.81	5.04	6	3.68	FALSE	Yes	186	Lurcher		3	Large	M	2014-05-09	FALSE	FALSE
6956	5118	2016-08-30	48	208.714	1461	4	4.00274	middle-aged	2.93	2.97	3.86	2.86	FALSE	Yes	37	Bavarian Mountain Hound		2	Medium	M	2012-08-30	FALSE	FALSE
6958	5120	2016-08-30	60	261.571	1831	5	5.01644	middle-aged	4.15	6	6	4.26	FALSE	Yes	284	Bull Terrier - Staffordshire		2	Medium	F	2011-08-26	FALSE	FALSE
6959	5121	2016-08-30	30	134.286	940	2	2.57534	young	4.15	6	6	4.26	FALSE	Yes	95	Cockapoo / Cockerpoo / Spoodle (X Spaniel/Poodle)		2	Medium	M	2014-02-02	FALSE	FALSE
6961	5122	2016-08-30	3	17	119	0	0.326027	young	4.15	6	6	3.97	FALSE	Yes	4	Mixed (Small)		1	Small	F	2016-05-03	FALSE	FALSE
6965	5125	2016-08-30	24	107.857	755	2	2.06849	young	2.23	5.36	4.86	3.06	FALSE	Yes	5	Mixed (Medium)		2	Medium	F	2014-08-06	FALSE	FALSE
6966	5126	2016-08-30	7	30.8571	216	0	0.591781	young	3.25	5.16	4.87	4.09	FALSE	Yes	128	German Shepherd / Alsatian		3	Large	F	2016-01-27	FALSE	FALSE
6951	5116	2016-08-29	52	228.857	1602	4	4.38904	middle-aged	2.47	4.48	6	1.33	FALSE	Yes	101	Cross Breed (Unknown X )/ Mongrel		4	Extra Large	M	2012-04-10	FALSE	FALSE
6938	3552	2016-08-27	184	802.857	5620	15	15.3973	old	2.9	5.43	5.18	3.67	TRUE	Yes	4	Mixed (Small)		1	Small	M	2001-04-08	FALSE	FALSE
6940	5110	2016-08-27	3	16	112	0	0.306849	young	3.99	5.9	6	4.26	FALSE	Yes	261	Shih Tzu		1	Small	M	2016-05-07	FALSE	FALSE
6915	5098	2016-08-25	12	54.4286	381	1	1.04384	young	3.87	5.7	5.89	3.39	FALSE	Yes	101	Cross Breed (Unknown X )/ Mongrel		4	Extra Large	M	2015-08-10	FALSE	FALSE
6921	4012	2016-08-25	17	75.8571	531	1	1.45479	young	4.15	6	6	4.26	FALSE	Yes	177	Retriever - Labrador		3	Large	M	2015-03-13	FALSE	FALSE
6925	5100	2016-08-25	26	115.571	809	2	2.21644	young	4.15	5.39	6	4.26	FALSE	Yes	177	Retriever - Labrador		3	Large	F	2014-06-08	FALSE	FALSE
6929	5103	2016-08-25	110	479.143	3354	9	9.18904	old	2.08	3.99	3.94	2.13	TRUE	Yes	199	Schnauzer (Miniature)		1	Small	M	2007-06-20	FALSE	TRUE
6912	4152	2016-08-24	21	93.5714	655	1	1.79452	young	4.09	6	6	2.94	FALSE	Yes	177	Retriever - Labrador		3	Large	F	2014-11-08	FALSE	FALSE
6913	4151	2016-08-24	102	445.714	3120	8	8.54795	old	3.1	5.64	5.9	4.26	TRUE	Yes	177	Retriever - Labrador		3	Large	F	2008-02-08	FALSE	FALSE
6832	3033	2016-08-23	14	61.4286	430	1	1.17808	young	3.83	6	5.36	3.43	FALSE	Yes	177	Retriever - Labrador		3	Large	F	2015-06-20	FALSE	FALSE
6836	4831	2016-08-23	70	306	2142	5	5.86849	middle-aged	3.68	6	5.81	3.55	FALSE	Yes	96	Spaniel - English Cocker		2	Medium	M	2010-10-12	FALSE	FALSE
6827	5003	2016-08-22	36	156.714	1097	3	3.00548	young	3.62	5.27	5.79	2.64	FALSE	Yes	128	German Shepherd / Alsatian		3	Large	F	2013-08-21	FALSE	FALSE
6819	5001	2016-08-21	6	29	203	0	0.556164	young	3.73	6	5.21	4.09	FALSE	Yes	177	Retriever - Labrador		3	Large	F	2016-01-31	FALSE	FALSE
6811	1650	2016-08-20	55	243.286	1703	4	4.66575	middle-aged	3.76	6	5.24	1.04	FALSE	Yes	4	Mixed (Small)		1	Small	F	2011-12-22	FALSE	FALSE
6804	1712	2016-08-19	37	162.286	1136	3	3.11233	young	3.64	5.73	5.9	3.97	FALSE	Yes	163	Jack/Parson Russell Terrier		1	Small	M	2013-07-10	FALSE	FALSE
6793	4225	2016-08-18	24	107.286	751	2	2.05753	young	4	6	6	2.65	FALSE	Yes	98	Collie - Rough Coat		2	Medium	M	2014-07-29	FALSE	FALSE
6789	4984	2016-08-17	62	272.429	1907	5	5.22466	middle-aged	3.62	5.81	5.81	3.55	FALSE	Yes	136	Retriever - Golden		3	Large	F	2011-05-29	FALSE	FALSE
6774	4978	2016-08-16	10	45.8571	321	0	0.879452	young	3.78	6	5.71	3.55	FALSE	Yes	5	Mixed (Medium)		2	Medium	F	2015-09-30	FALSE	FALSE
6775	4979	2016-08-16	42	186.429	1305	3	3.57534	young	3.37	5.56	5.9	4.01	FALSE	Yes	52	Bichon Frise		1	Small	F	2013-01-19	FALSE	FALSE
6776	4980	2016-08-16	26	114.286	800	2	2.19178	young	4.07	6	6	4.01	FALSE	Yes	52	Bichon Frise		1	Small	M	2014-06-08	FALSE	TRUE
6778	4981	2016-08-16	32	142.714	999	2	2.73699	young	1.89	5.44	3.89	1.04	FALSE	Yes	232	Puggle (X Pug/ Beagle)		1	Small	F	2013-11-21	FALSE	FALSE
6769	4976	2016-08-15	43	187.571	1313	3	3.59726	young	3.08	4.74	5.9	3.68	FALSE	Yes	98	Collie - Rough Coat		2	Medium	M	2013-01-10	FALSE	FALSE
6770	4977	2016-08-15	77	335.857	2351	6	6.4411	middle-aged	2.16	3.74	3.57	1.91	FALSE	Yes	177	Retriever - Labrador		3	Large	M	2010-03-09	FALSE	FALSE
6753	2159	2016-08-14	75	329.571	2307	6	6.32055	middle-aged	4.15	6	6	4.26	FALSE	Yes	5	Mixed (Medium)		2	Medium	F	2010-04-21	FALSE	FALSE
6761	3708	2016-08-14	34	151.857	1063	2	2.91233	young	4.03	6	6	3.19	FALSE	Yes	274	Spaniel - English Springer		2	Medium	F	2013-09-16	FALSE	FALSE
6728	4952	2016-08-13	27	117.571	823	2	2.25479	young	3.99	5.39	6	3.43	FALSE	Yes	59	Border Collie		2	Medium	F	2014-05-13	FALSE	TRUE
6729	4953	2016-08-13	10	47.5714	333	0	0.912329	young	4.15	5.39	6	4.26	FALSE	Yes	59	Border Collie		2	Medium	M	2015-09-15	FALSE	FALSE
6730	4954	2016-08-13	79	346.714	2427	6	6.64932	middle-aged	4.15	6	6	4.26	TRUE	Yes	59	Border Collie		2	Medium	F	2009-12-21	FALSE	TRUE
6731	4955	2016-08-13	10	47.5714	333	0	0.912329	young	4.15	6	6	4.26	FALSE	Yes	59	Border Collie		2	Medium	M	2015-09-15	FALSE	FALSE
6732	4956	2016-08-13	27	117.571	823	2	2.25479	young	4.15	6	6	4.26	FALSE	Yes	59	Border Collie		2	Medium	F	2014-05-13	FALSE	FALSE
6733	4957	2016-08-13	79	346.714	2427	6	6.64932	middle-aged	4.15	6	6	4.26	TRUE	Yes	59	Border Collie		2	Medium	F	2009-12-21	FALSE	FALSE
6736	4173	2016-08-13	7	32.5714	228	0	0.624658	young	3.87	5.3	6	4.26	FALSE	Yes	101	Cross Breed (Unknown X )/ Mongrel		4	Extra Large	M	2015-12-29	FALSE	FALSE
6738	3666	2016-08-13	15	69.4286	486	1	1.33151	young	3.89	5.92	6	3.97	FALSE	Yes	189	Maltese		1	Small	M	2015-04-15	FALSE	FALSE
6743	4961	2016-08-13	3	16.4286	115	0	0.315068	young	3.63	5.59	5.69	3.97	FALSE	Yes	95	Cockapoo / Cockerpoo / Spoodle (X Spaniel/Poodle)		2	Medium	F	2016-04-20	FALSE	FALSE
6752	4969	2016-08-13	38	165.714	1160	3	3.17808	young	3.84	6	5.9	4.26	FALSE	Yes	183	Lhasa Apso		1	Small	M	2013-06-10	FALSE	FALSE
6723	4951	2016-08-12	127	555.571	3889	10	10.6548	old	3.97	4.45	4.98	4.09	TRUE	Yes	59	Border Collie		2	Medium	F	2005-12-19	FALSE	FALSE
6712	4943	2016-08-11	4	19.2857	135	0	0.369863	young	4.07	6	5.47	3.22	FALSE	Yes	177	Retriever - Labrador		3	Large	M	2016-03-29	FALSE	FALSE
6713	4944	2016-08-11	39	171.143	1198	3	3.28219	young	3.15	5.9	6	4.01	FALSE	Yes	148	Havanese		1	Small	F	2013-05-01	FALSE	FALSE
6716	3821	2016-08-11	31	137.714	964	2	2.6411	young	4.15	6	6	4.26	FALSE	Yes	70	Bull Terrier (Standard)		2	Medium	F	2013-12-21	FALSE	FALSE
6721	4949	2016-08-11	9	39.2857	275	0	0.753425	young	4.07	6	5.47	3.22	FALSE	Yes	284	Bull Terrier - Staffordshire		2	Medium	M	2015-11-10	FALSE	FALSE
6722	4950	2016-08-11	60	261.286	1829	5	5.01096	middle-aged	3.14	5.79	5.13	2.15	FALSE	Yes	86	Chihuahua - Long Coat		1	Small	F	2011-08-09	FALSE	FALSE
6706	3880	2016-08-10	20	88.7143	621	1	1.70137	young	4.15	6	5.89	4.26	FALSE	Yes	120	Retriever - Flat-Coated		3	Large	M	2014-11-28	FALSE	FALSE
6709	4942	2016-08-10	41	179.714	1258	3	3.44658	young	3.45	6	6	2.65	FALSE	Yes	4	Mixed (Small)		1	Small	F	2013-03-01	FALSE	FALSE
6704	4938	2016-08-09	143	622.857	4360	11	11.9452	old	3.67	5.38	5.47	4.26	TRUE	Yes	177	Retriever - Labrador		3	Large	M	2004-09-01	FALSE	FALSE
6687	4931	2016-08-08	7	32.7143	229	0	0.627397	young	3.4	5.07	4.9	2.93	FALSE	Yes	87	Chihuahua - Smooth Coat		1	Small	M	2015-12-23	FALSE	FALSE
6692	4467	2016-08-08	9	39.5714	277	0	0.758904	young	3.42	5.56	6	4.01	FALSE	Yes	70	Bull Terrier (Standard)		2	Medium	M	2015-11-05	FALSE	FALSE
6678	4927	2016-08-07	61	268.429	1879	5	5.14795	middle-aged	3.41	5.16	5.65	3.43	FALSE	Yes	52	Bichon Frise		1	Small	F	2011-06-16	FALSE	FALSE
6680	4928	2016-08-07	81	354.571	2482	6	6.8	middle-aged	3.99	6	5.89	4.26	TRUE	Yes	128	German Shepherd / Alsatian		3	Large	M	2009-10-21	FALSE	FALSE
6685	4424	2016-08-07	5	24.7143	173	0	0.473973	young	3.52	5.91	5.8	3.97	FALSE	Yes	177	Retriever - Labrador		3	Large	M	2016-02-16	FALSE	FALSE
6676	4926	2016-08-06	87	381.429	2670	7	7.31507	middle-aged	2.16	4.53	3.29	3.49	TRUE	Yes	284	Bull Terrier - Staffordshire		2	Medium	M	2009-04-15	FALSE	FALSE
6672	1297	2016-08-05	50	220.143	1541	4	4.22192	middle-aged	4.01	6	6	3.97	FALSE	Yes	128	German Shepherd / Alsatian		3	Large	F	2012-05-17	FALSE	FALSE
6658	4429	2016-08-04	130	565.714	3960	10	10.8493	old	3.85	5.91	5.8	4.26	TRUE	Yes	163	Jack/Parson Russell Terrier		1	Small	F	2005-10-01	FALSE	FALSE
6659	4920	2016-08-04	19	83.5714	585	1	1.60274	young	3.81	5.64	5.8	3.43	FALSE	Yes	177	Retriever - Labrador		3	Large	M	2014-12-28	FALSE	TRUE
6664	4922	2016-08-04	21	92.2857	646	1	1.76986	young	4.15	6	5.58	3.72	FALSE	Yes	4	Mixed (Small)		1	Small	F	2014-10-28	FALSE	FALSE
6653	4452	2016-08-03	16	71.2857	499	1	1.36712	young	4.15	6	6	2.11	FALSE	Yes	59	Border Collie		2	Medium	F	2015-03-23	FALSE	FALSE
6656	4919	2016-08-03	35	152.714	1069	2	2.92877	young	4.07	6	6	4.26	FALSE	Yes	5	Mixed (Medium)		2	Medium	F	2013-08-30	FALSE	FALSE
6641	4914	2016-08-02	12	55.1429	386	1	1.05753	young	4.15	6	6	4.26	FALSE	Yes	177	Retriever - Labrador		3	Large	M	2015-07-13	FALSE	FALSE
6645	4916	2016-08-02	20	91.1429	638	1	1.74795	young	2.9	5.31	5.54	1.59	FALSE	Yes	128	German Shepherd / Alsatian		3	Large	F	2014-11-03	FALSE	FALSE
6646	4440	2016-08-02	6	27.7143	194	0	0.531507	young	3.95	5.12	6	3.72	FALSE	Yes	101	Cross Breed (Unknown X )/ Mongrel		4	Extra Large	M	2016-01-21	FALSE	FALSE
6647	4917	2016-08-02	72	315.571	2209	6	6.05205	middle-aged	2.97	5.73	5.8	2.9	FALSE	Yes	59	Border Collie		2	Medium	M	2010-07-16	FALSE	FALSE
6631	4299	2016-08-01	19	82.5714	578	1	1.58356	young	4.15	6	6	4.26	FALSE	Yes	101	Cross Breed (Unknown X )/ Mongrel		4	Extra Large	F	2015-01-01	FALSE	FALSE
6632	4300	2016-08-01	19	82.5714	578	1	1.58356	young	4.15	6	6	4.26	FALSE	Yes	101	Cross Breed (Unknown X )/ Mongrel		4	Extra Large	M	2015-01-01	FALSE	FALSE
6633	3857	2016-08-01	71	312.571	2188	5	5.99452	middle-aged	4.15	6	6	4.26	FALSE	Yes	87	Chihuahua - Smooth Coat		1	Small	F	2010-08-05	FALSE	FALSE
6637	3258	2016-08-01	23	101	707	1	1.93699	young	4.15	5.39	6	4.26	FALSE	Yes	95	Cockapoo / Cockerpoo / Spoodle (X Spaniel/Poodle)		2	Medium	M	2014-08-25	FALSE	FALSE
6620	4907	2016-07-31	125	545.714	3820	10	10.4658	old	3.59	5.22	5.38	3.22	TRUE	Yes	59	Border Collie		2	Medium	F	2006-02-14	FALSE	FALSE
6621	4908	2016-07-31	121	530.429	3713	10	10.1726	old	2.58	5.41	4.92	3.09	TRUE	Yes	177	Retriever - Labrador		3	Large	F	2006-06-01	FALSE	FALSE
6623	4910	2016-07-31	9	42.2857	296	0	0.810959	young	3.96	6	6	4.26	FALSE	Yes	101	Cross Breed (Unknown X )/ Mongrel		4	Extra Large	F	2015-10-09	FALSE	FALSE
6613	4903	2016-07-30	28	123.571	865	2	2.36986	young	3.75	5.8	5.47	2.56	FALSE	Yes	177	Retriever - Labrador		3	Large	M	2014-03-18	FALSE	FALSE
6615	4905	2016-07-30	97	425.857	2981	8	8.16712	old	3.17	5.91	5.14	4.09	TRUE	Yes	260	Japanese Shiba Inu		2	Medium	M	2008-06-01	FALSE	TRUE
6617	4416	2016-07-30	5	23.4286	164	0	0.449315	young	4.15	6	6	4.26	FALSE	Yes	246	Rottweiler		3	Large	M	2016-02-17	FALSE	FALSE
6618	3524	2016-07-30	87	381.857	2673	7	7.32329	middle-aged	3.43	5.12	5.59	3.55	TRUE	Yes	128	German Shepherd / Alsatian		3	Large	F	2009-04-05	FALSE	FALSE
6606	4900	2016-07-29	9	41.8571	293	0	0.80274	young	4.15	6	6	4.26	FALSE	Yes	284	Bull Terrier - Staffordshire		2	Medium	F	2015-10-10	FALSE	FALSE
6607	4391	2016-07-29	60	262.714	1839	5	5.03836	middle-aged	4.01	6	5.9	3.97	FALSE	Yes	52	Bichon Frise		1	Small	F	2011-07-17	FALSE	FALSE
6608	4901	2016-07-29	50	221.429	1550	4	4.24658	middle-aged	3.05	5.72	5.9	4.26	FALSE	Yes	245	Rhodesian Ridgeback		3	Large	M	2012-05-01	FALSE	FALSE
6609	4443	2016-07-29	104	453.143	3172	8	8.69041	old	3.98	5.37	6	4.26	TRUE	Yes	98	Collie - Rough Coat		2	Medium	M	2007-11-22	FALSE	TRUE
6599	4895	2016-07-28	26	116.143	813	2	2.2274	young	3.67	5.38	5.9	2.61	FALSE	Yes	183	Lhasa Apso		1	Small	F	2014-05-07	FALSE	FALSE
6602	4897	2016-07-28	55	242.571	1698	4	4.65205	middle-aged	4.01	6	5.81	3.55	FALSE	Yes	59	Border Collie		2	Medium	M	2011-12-04	FALSE	FALSE
6603	4898	2016-07-28	4	19.5714	137	0	0.375342	young	4.09	6	4.97	3.43	FALSE	Yes	59	Border Collie		2	Medium	F	2016-03-13	FALSE	FALSE
6604	3356	2016-07-28	38	168	1176	3	3.22192	young	4.09	5.82	6	4.01	FALSE	Yes	4	Mixed (Small)		1	Small	M	2013-05-09	FALSE	FALSE
6587	4888	2016-07-27	53	234	1638	4	4.48767	middle-aged	3.86	5.39	6	4.26	FALSE	Yes	170	King Charles Spaniel (Standard)		1	Small	F	2012-02-01	FALSE	FALSE
6591	4891	2016-07-27	11	48.4286	339	0	0.928767	young	4	6	6	2.52	FALSE	Yes	52	Bichon Frise		1	Small	M	2015-08-23	FALSE	FALSE
6592	4892	2016-07-27	24	108.571	760	2	2.08219	young	2.78	4.84	3.95	4.26	FALSE	Yes	6	Mixed (Large)		3	Large	M	2014-06-28	FALSE	FALSE
6595	4893	2016-07-27	4	17.4286	122	0	0.334247	young	4.15	6	6	4.01	FALSE	Yes	96	Spaniel - English Cocker		2	Medium	M	2016-03-27	FALSE	FALSE
6597	4894	2016-07-27	75	326.143	2283	6	6.25479	middle-aged	3.83	6	5.36	1.52	FALSE	Yes	284	Bull Terrier - Staffordshire		2	Medium	M	2010-04-27	FALSE	FALSE
6573	2846	2016-07-26	30	133	931	2	2.55068	young	4.15	5.39	6	4.26	FALSE	Yes	2	Other (Medium)		2	Medium	F	2014-01-07	FALSE	FALSE
6577	3373	2016-07-26	109	476.571	3336	9	9.13973	old	3.89	5.9	6	3.72	TRUE	Yes	101	Cross Breed (Unknown X )/ Mongrel		4	Extra Large	F	2007-06-08	FALSE	TRUE
6578	3372	2016-07-26	74	322.571	2258	6	6.1863	middle-aged	4.15	6	6	4.26	FALSE	Yes	177	Retriever - Labrador		3	Large	F	2010-05-21	FALSE	TRUE
6579	3371	2016-07-26	149	647.857	4535	12	12.4247	old	4.09	6	5.78	4.09	TRUE	Yes	177	Retriever - Labrador		3	Large	F	2004-02-25	FALSE	TRUE
6580	3374	2016-07-26	38	169	1183	3	3.2411	young	4.15	6	6	4.26	FALSE	Yes	177	Retriever - Labrador		3	Large	F	2013-04-30	FALSE	FALSE
6585	3407	2016-07-26	33	146.857	1028	2	2.81644	young	3.67	6	4.53	4.26	FALSE	Yes	245	Rhodesian Ridgeback		3	Large	F	2013-10-02	FALSE	FALSE
6560	2651	2016-07-25	61	269	1883	5	5.1589	middle-aged	3.69	5.91	5.26	4.01	FALSE	Yes	101	Cross Breed (Unknown X )/ Mongrel		4	Extra Large	F	2011-05-30	FALSE	FALSE
6561	4879	2016-07-25	13	57.1429	400	1	1.09589	young	3.95	5.3	6	3.43	FALSE	Yes	96	Spaniel - English Cocker		2	Medium	M	2015-06-21	FALSE	FALSE
6568	3165	2016-07-25	14	62.2857	436	1	1.19452	young	2.9	5.64	6	3.68	FALSE	Yes	199	Schnauzer (Miniature)		1	Small	M	2015-05-16	FALSE	FALSE
6545	2734	2016-07-24	142	618.143	4327	11	11.8548	old	4.15	6	5.23	4.26	TRUE	Yes	74	Cairn Terrier		1	Small	M	2004-09-18	FALSE	FALSE
6548	4869	2016-07-24	41	179.714	1258	3	3.44658	young	2.1	4.81	4.29	1.17	FALSE	Yes	177	Retriever - Labrador		3	Large	M	2013-02-12	FALSE	FALSE
6549	4870	2016-07-24	101	440	3080	8	8.43836	old	2.96	5.81	5.61	3.26	TRUE	Yes	74	Cairn Terrier		1	Small	M	2008-02-17	FALSE	FALSE
6553	4873	2016-07-24	20	88.4286	619	1	1.69589	young	3.64	5.82	5.52	3.67	FALSE	Yes	59	Border Collie		2	Medium	F	2014-11-13	FALSE	FALSE
6555	4874	2016-07-24	19	85.2857	597	1	1.63562	young	3.92	6	5.32	4.01	FALSE	Yes	303	West Highland White Terrier		1	Small	F	2014-12-05	FALSE	FALSE
6556	4875	2016-07-24	8	36.1429	253	0	0.693151	young	4.07	5.39	6	4.26	FALSE	Yes	101	Cross Breed (Unknown X )/ Mongrel		4	Extra Large	M	2015-11-14	FALSE	TRUE
6557	4876	2016-07-24	108	473.571	3315	9	9.08219	old	2.82	5.54	5.71	3.8	TRUE	Yes	260	Japanese Shiba Inu		2	Medium	F	2007-06-27	FALSE	TRUE
6543	2320	2016-07-23	21	95.2857	667	1	1.8274	young	2.87	5.37	5.5	2.43	FALSE	Yes	303	West Highland White Terrier		1	Small	M	2014-09-25	FALSE	FALSE
6544	4423	2016-07-23	31	135.857	951	2	2.60548	young	4.15	6	6	3.97	FALSE	Yes	98	Collie - Rough Coat		2	Medium	M	2013-12-15	FALSE	FALSE
6526	3265	2016-07-22	99	434.714	3043	8	8.33699	old	3.89	6	6	4.26	TRUE	Yes	163	Jack/Parson Russell Terrier		1	Small	M	2008-03-23	FALSE	FALSE
6529	4861	2016-07-22	4	18.2857	128	0	0.350685	young	4.15	6	6	3.97	FALSE	Yes	3	Other (Large)		3	Large	M	2016-03-16	FALSE	FALSE
6530	4862	2016-07-22	14	62.8571	440	1	1.20548	young	4.15	3.58	4.44	3.74	FALSE	Yes	136	Retriever - Golden		3	Large	F	2015-05-09	FALSE	FALSE
6538	4866	2016-07-22	92	400	2800	7	7.67123	middle-aged	3.61	5.64	5.43	2.97	TRUE	Yes	98	Collie - Rough Coat		2	Medium	M	2008-11-21	FALSE	FALSE
6539	4867	2016-07-22	22	97.2857	681	1	1.86575	young	4.15	6	6	4.26	FALSE	Yes	62	Boston Terrier		1	Small	M	2014-09-10	FALSE	TRUE
6519	4857	2016-07-21	57	249.429	1746	4	4.78356	middle-aged	2.85	4.74	5.21	3.55	FALSE	Yes	223	Pomeranian		1	Small	F	2011-10-10	FALSE	FALSE
6520	3061	2016-07-21	21	92.1429	645	1	1.76712	young	3.43	5.43	5.57	2.27	FALSE	Yes	279	Spaniel - American Cocker		2	Medium	M	2014-10-15	FALSE	FALSE
6521	4858	2016-07-21	125	546.286	3824	10	10.4767	old	3.72	5.9	6	3.97	TRUE	Yes	309	Yorkshire Terrier		1	Small	F	2006-01-31	FALSE	FALSE
6524	4860	2016-07-21	4	17.7143	124	0	0.339726	young	3.54	5.91	5.72	3.01	FALSE	Yes	122	Fox Terrier - Wire		2	Medium	M	2016-03-19	FALSE	FALSE
6514	4856	2016-07-20	77	334.714	2343	6	6.41918	middle-aged	3.9	5.39	5.88	3.03	FALSE	Yes	101	Cross Breed (Unknown X )/ Mongrel		4	Extra Large	M	2010-02-19	FALSE	FALSE
6516	4343	2016-07-20	69	302.714	2119	5	5.80548	middle-aged	4.09	5.91	5.08	3.72	FALSE	Yes	3	Other (Large)		3	Large	F	2010-10-01	FALSE	FALSE
6518	4309	2016-07-20	75	327.286	2291	6	6.27671	middle-aged	3.06	5.72	4.68	2.78	FALSE	Yes	177	Retriever - Labrador		3	Large	F	2010-04-12	FALSE	FALSE
6510	4852	2016-07-19	61	265.857	1861	5	5.09863	middle-aged	2.93	5.46	5.61	3.01	FALSE	Yes	303	West Highland White Terrier		1	Small	M	2011-06-15	FALSE	TRUE
6511	4853	2016-07-19	49	213.714	1496	4	4.09863	middle-aged	4.03	5.92	6	3.14	FALSE	Yes	59	Border Collie		2	Medium	M	2012-06-14	FALSE	FALSE
6512	4854	2016-07-19	11	51.7143	362	0	0.991781	young	2.92	4.92	4.69	4.09	FALSE	Yes	284	Bull Terrier - Staffordshire		2	Medium	F	2015-07-23	FALSE	FALSE
6496	4844	2016-07-18	6	27.4286	192	0	0.526027	young	3.9	6	6	4.26	FALSE	Yes	59	Border Collie		2	Medium	F	2016-01-08	FALSE	FALSE
6500	4845	2016-07-18	73	321.286	2249	6	6.16164	middle-aged	3.38	6	5.9	4.26	FALSE	Yes	199	Schnauzer (Miniature)		1	Small	M	2010-05-22	FALSE	FALSE
6485	2255	2016-07-17	83	361.714	2532	6	6.93699	middle-aged	2.88	5.64	5.06	4.01	TRUE	Yes	144	Greyhound		3	Large	F	2009-08-11	FALSE	FALSE
6487	4841	2016-07-17	8	37.4286	262	0	0.717808	young	3.55	4.96	6	3.97	FALSE	Yes	95	Cockapoo / Cockerpoo / Spoodle (X Spaniel/Poodle)		2	Medium	F	2015-10-29	FALSE	FALSE
6489	3682	2016-07-17	112	490.286	3432	9	9.40274	old	3.77	6	5.9	4.26	TRUE	Yes	136	Retriever - Golden		3	Large	M	2007-02-23	FALSE	TRUE
6495	3868	2016-07-17	32	142.286	996	2	2.72877	young	3.74	5.82	5.9	4.26	FALSE	Yes	60	Border Terrier		1	Small	F	2013-10-25	FALSE	FALSE
6477	4839	2016-07-16	42	183.571	1285	3	3.52055	young	4.15	5.37	5.19	4.26	FALSE	Yes	46	Belgian Shepherd Dog - Malinois		3	Large	M	2013-01-08	FALSE	FALSE
6481	3826	2016-07-16	14	65	455	1	1.24658	young	4.15	5.39	6	3.97	FALSE	Yes	60	Border Terrier		1	Small	M	2015-04-18	FALSE	TRUE
6484	4840	2016-07-16	99	434.571	3042	8	8.33425	old	4.15	5.39	5.36	4.26	TRUE	Yes	5	Mixed (Medium)		2	Medium	M	2008-03-18	FALSE	FALSE
6468	4836	2016-07-15	21	94.5714	662	1	1.8137	young	3.76	6	6	4.26	FALSE	Yes	163	Jack/Parson Russell Terrier		1	Small	F	2014-09-22	FALSE	FALSE
6469	4377	2016-07-15	59	259.143	1814	4	4.96986	middle-aged	4.15	6	6	4.26	FALSE	Yes	7	Affenpinscher		1	Small	M	2011-07-28	FALSE	FALSE
6470	4837	2016-07-15	96	417.429	2922	8	8.00548	old	3.39	4.98	5.8	3.48	TRUE	Yes	189	Maltese		1	Small	M	2008-07-15	FALSE	FALSE
6457	2690	2016-07-14	93	405.286	2837	7	7.7726	middle-aged	3.67	6	5.4	3.8	TRUE	Yes	101	Cross Breed (Unknown X )/ Mongrel		4	Extra Large	M	2008-10-07	FALSE	FALSE
6462	4832	2016-07-14	51	225.857	1581	4	4.33151	middle-aged	4.01	5.44	6	4.26	FALSE	Yes	95	Cockapoo / Cockerpoo / Spoodle (X Spaniel/Poodle)		2	Medium	F	2012-03-16	FALSE	TRUE
6449	3313	2016-07-13	44	194.714	1363	3	3.73425	young	3.76	6	5.81	4.09	FALSE	Yes	231	Pug		1	Small	M	2012-10-19	FALSE	TRUE
6450	4158	2016-07-13	21	93.4286	654	1	1.79178	young	3.89	5.62	6	2.16	FALSE	Yes	5	Mixed (Medium)		2	Medium	F	2014-09-28	FALSE	FALSE
6452	2213	2016-07-13	23	101.429	710	1	1.94521	young	4.15	5.39	6	4.26	FALSE	Yes	4	Mixed (Small)		1	Small	F	2014-08-03	FALSE	FALSE
6455	4829	2016-07-13	12	52.7143	369	1	1.01096	young	3.73	5.79	5.71	2.72	FALSE	Yes	4	Mixed (Small)		1	Small	F	2015-07-10	FALSE	FALSE
6440	4824	2016-07-12	173	752.143	5265	14	14.4247	old	2.04	5.23	4.26	3.13	TRUE	Yes	152	Hungarian Vizsla		3	Large	M	2002-02-11	FALSE	FALSE
6445	4826	2016-07-12	60	261	1827	5	5.00548	middle-aged	3.59	5.64	5.16	4.26	FALSE	Yes	144	Greyhound		3	Large	F	2011-07-12	FALSE	TRUE
6429	3739	2016-07-11	18	79	553	1	1.51507	young	3.54	6	5.68	4.26	FALSE	Yes	124	Bulldog - French		1	Small	F	2015-01-05	FALSE	TRUE
6431	4821	2016-07-11	15	65.2857	457	1	1.25205	young	3.52	6	5.81	3.55	FALSE	Yes	10	Akita - American		3	Large	F	2015-04-11	FALSE	FALSE
6417	4816	2016-07-10	143	625.143	4376	11	11.989	old	3.47	5.15	4.66	1.61	TRUE	Yes	309	Yorkshire Terrier		1	Small	F	2004-07-17	FALSE	FALSE
6418	4353	2016-07-10	42	184.571	1292	3	3.53973	young	3.22	5.18	5.6	3.26	FALSE	Yes	274	Spaniel - English Springer		2	Medium	M	2012-12-26	FALSE	TRUE
6422	4233	2016-07-10	12	54.2857	380	1	1.0411	young	3.65	5.54	5.9	3.43	FALSE	Yes	177	Retriever - Labrador		3	Large	F	2015-06-26	FALSE	FALSE
6402	4809	2016-07-09	11	49.8571	349	0	0.956164	young	3.65	5.73	5.51	2.16	FALSE	Yes	4	Mixed (Small)		1	Small	F	2015-07-26	FALSE	FALSE
6405	4810	2016-07-09	9	42	294	0	0.805479	young	3.64	5.48	5.47	2.64	FALSE	Yes	96	Spaniel - English Cocker		2	Medium	M	2015-09-19	FALSE	FALSE
6410	4812	2016-07-09	85	373.857	2617	7	7.16986	middle-aged	2.49	5.39	4.56	3.22	TRUE	Yes	284	Bull Terrier - Staffordshire		2	Medium	M	2009-05-10	FALSE	FALSE
6412	3267	2016-07-09	62	272.143	1905	5	5.21918	middle-aged	4.15	6	6	4.26	FALSE	Yes	60	Border Terrier		1	Small	M	2011-04-22	FALSE	FALSE
6414	4814	2016-07-09	154	669.857	4689	12	12.8466	old	2.97	5.15	4.39	4.26	TRUE	Yes	60	Border Terrier		1	Small	F	2003-09-07	FALSE	FALSE
6389	3566	2016-07-08	9	42.8571	300	0	0.821918	young	3.54	5.42	5.38	3.55	FALSE	Yes	274	Spaniel - English Springer		2	Medium	M	2015-09-12	FALSE	FALSE
6391	4329	2016-07-08	49	213.286	1493	4	4.09041	middle-aged	3.23	5.91	5.54	2.72	FALSE	Yes	186	Lurcher		3	Large	M	2012-06-06	FALSE	FALSE
6393	4801	2016-07-08	18	80.5714	564	1	1.54521	young	3.69	5.61	5.22	1.62	FALSE	Yes	5	Mixed (Medium)		2	Medium	F	2014-12-22	FALSE	FALSE
6398	4805	2016-07-08	17	78	546	1	1.49589	young	4.03	5.29	5.01	2.4	FALSE	Yes	13	Malamute - Alaskan		4	Extra Large	M	2015-01-09	FALSE	FALSE
6400	4807	2016-07-08	83	363.857	2547	6	6.97808	middle-aged	4	6	6	4.26	TRUE	Yes	177	Retriever - Labrador		3	Large	F	2009-07-18	FALSE	FALSE
6401	4808	2016-07-08	16	71.2857	499	1	1.36712	young	3.57	5.63	5.58	3.55	FALSE	Yes	136	Retriever - Golden		3	Large	M	2015-02-25	FALSE	FALSE
6380	4798	2016-07-07	17	74.8571	524	1	1.43562	young	3.81	6	5.9	2.85	FALSE	Yes	52	Bichon Frise		1	Small	F	2015-01-30	FALSE	FALSE
6367	4794	2016-07-05	88	383.429	2684	7	7.35342	middle-aged	3.39	5.62	6	2.9	TRUE	Yes	274	Spaniel - English Springer		2	Medium	F	2009-02-28	FALSE	FALSE
6353	4786	2016-07-04	129	564.429	3951	10	10.8247	old	2.08	3.99	3.69	2.42	TRUE	Yes	177	Retriever - Labrador		3	Large	F	2005-09-09	FALSE	TRUE
6355	4787	2016-07-04	70	306.429	2145	5	5.87671	middle-aged	2.57	5.19	5.7	3.68	FALSE	Yes	6	Mixed (Large)		3	Large	M	2010-08-20	FALSE	FALSE
6357	4789	2016-07-04	70	307.143	2150	5	5.89041	middle-aged	3.56	5.48	5.9	3.97	FALSE	Yes	6	Mixed (Large)		3	Large	M	2010-08-15	FALSE	FALSE
6362	2223	2016-07-04	103	450.429	3153	8	8.63836	old	4.15	5.03	3.51	4.09	TRUE	Yes	298	Weimaraner		3	Large	F	2007-11-16	FALSE	FALSE
6363	3618	2016-07-04	45	197.286	1381	3	3.78356	young	2.71	5.64	5.47	2.23	FALSE	Yes	5	Mixed (Medium)		2	Medium	F	2012-09-22	FALSE	FALSE
6342	4779	2016-07-03	24	106.286	744	2	2.03836	young	4.09	6	6	3.14	FALSE	Yes	221	Pointer - English		3	Large	F	2014-06-20	FALSE	FALSE
6343	4780	2016-07-03	12	53	371	1	1.01644	young	3.93	4.67	6	2.9	FALSE	Yes	5	Mixed (Medium)		2	Medium	F	2015-06-28	FALSE	FALSE
6344	4781	2016-07-03	4	19.7143	138	0	0.378082	young	3.96	6	5.8	3.43	FALSE	Yes	163	Jack/Parson Russell Terrier		1	Small	F	2016-02-16	FALSE	FALSE
6348	4295	2016-07-03	143	622.286	4356	11	11.9342	old	4.15	5.39	6	4.26	TRUE	Yes	207	Norwegian Elkhound		3	Large	F	2004-07-30	FALSE	FALSE
6349	4783	2016-07-03	28	125.714	880	2	2.41096	young	4.07	5.44	5.89	4.01	FALSE	Yes	101	Cross Breed (Unknown X )/ Mongrel		4	Extra Large	F	2014-02-04	FALSE	FALSE
6329	4772	2016-07-02	4	20.8571	146	0	0.4	young	4.15	6	6	3.72	FALSE	Yes	231	Pug		1	Small	M	2016-02-07	FALSE	FALSE
6331	4774	2016-07-02	140	610.857	4276	11	11.7151	old	3.96	6	6	4.26	TRUE	Yes	152	Hungarian Vizsla		3	Large	M	2004-10-17	FALSE	FALSE
6332	4775	2016-07-02	14	63.5714	445	1	1.21918	young	3.78	5.72	6	3.72	FALSE	Yes	137	Goldendoodle (X Golden Retriever/Poodle)		3	Large	M	2015-04-14	FALSE	FALSE
6333	1135	2016-07-02	37	164.286	1150	3	3.15068	young	3.81	5.83	5.9	4.26	FALSE	Yes	82	King Charles Spaniel - Cavalier		1	Small	M	2013-05-09	FALSE	FALSE
6334	1937	2016-07-02	18	80.4286	563	1	1.54247	young	4.09	6	6	3.1	FALSE	Yes	82	King Charles Spaniel - Cavalier		1	Small	F	2014-12-17	FALSE	FALSE
6339	4778	2016-07-02	105	456.714	3197	8	8.7589	old	2.88	5.14	5.37	3.26	TRUE	Yes	86	Chihuahua - Long Coat		1	Small	M	2007-10-01	FALSE	FALSE
6317	4765	2016-07-01	73	320.571	2244	6	6.14795	middle-aged	3.49	5.59	6	2.85	FALSE	Yes	183	Lhasa Apso		1	Small	M	2010-05-10	FALSE	FALSE
6320	4767	2016-07-01	17	76.1429	533	1	1.46027	young	3.36	6	5.9	3.43	FALSE	Yes	177	Retriever - Labrador		3	Large	M	2015-01-15	FALSE	FALSE
6323	4769	2016-07-01	61	266.286	1864	5	5.10685	middle-aged	3.21	4.58	4.71	3.55	FALSE	Yes	13	Malamute - Alaskan		4	Extra Large	M	2011-05-25	FALSE	TRUE
6324	4770	2016-07-01	49	214	1498	4	4.10411	middle-aged	3.46	4.92	4.93	3.55	FALSE	Yes	13	Malamute - Alaskan		4	Extra Large	M	2012-05-25	FALSE	FALSE
6325	1251	2016-07-01	60	264.286	1850	5	5.06849	middle-aged	3.69	6	5.71	4.09	FALSE	Yes	199	Schnauzer (Miniature)		1	Small	M	2011-06-08	FALSE	FALSE
6326	4157	2016-07-01	18	80.8571	566	1	1.55068	young	4.02	5.82	6	3.43	FALSE	Yes	95	Cockapoo / Cockerpoo / Spoodle (X Spaniel/Poodle)		2	Medium	M	2014-12-13	FALSE	FALSE
6327	4771	2016-07-01	6	26	182	0	0.49863	young	3.95	5.9	6	3.97	FALSE	Yes	4	Mixed (Small)		1	Small	F	2016-01-01	FALSE	FALSE
6303	3907	2016-06-30	100	439	3073	8	8.41918	old	3.2	5.51	5.09	2.77	TRUE	Yes	101	Cross Breed (Unknown X )/ Mongrel		4	Extra Large	F	2008-01-31	FALSE	FALSE
6307	4760	2016-06-30	11	52.1429	365	0	1	young	4.15	5.39	6	4.26	FALSE	Yes	5	Mixed (Medium)		2	Medium	M	2015-07-01	FALSE	TRUE
6309	3990	2016-06-30	65	284.143	1989	5	5.44932	middle-aged	4.15	6	6	4.26	FALSE	Yes	163	Jack/Parson Russell Terrier		1	Small	F	2011-01-19	FALSE	FALSE
6311	4762	2016-06-30	73	318.143	2227	6	6.10137	middle-aged	3.78	5.3	5.36	4.01	FALSE	Yes	52	Bichon Frise		1	Small	M	2010-05-26	FALSE	FALSE
6313	4763	2016-06-30	24	106.143	743	2	2.03562	young	4.15	6	6	3.72	FALSE	Yes	24	Australian Kelpie Sheep Dog		2	Medium	F	2014-06-18	FALSE	FALSE
6294	4757	2016-06-29	101	440.714	3085	8	8.45205	old	2.98	5.31	4.49	3.38	TRUE	Yes	52	Bichon Frise		1	Small	F	2008-01-18	FALSE	FALSE
6297	3364	2016-06-29	21	93.8571	657	1	1.8	young	3.95	6	6	3.68	FALSE	Yes	60	Border Terrier		1	Small	M	2014-09-11	FALSE	FALSE
6299	4280	2016-06-29	23	103.857	727	1	1.99178	young	4.15	4.96	6	4.26	FALSE	Yes	274	Spaniel - English Springer		2	Medium	M	2014-07-03	FALSE	FALSE
6300	4758	2016-06-29	20	87.4286	612	1	1.67671	young	3.9	5.71	5.38	3.8	FALSE	Yes	284	Bull Terrier - Staffordshire		2	Medium	F	2014-10-26	FALSE	FALSE
6263	4738	2016-06-28	28	125.571	879	2	2.40822	young	3.22	5.72	6	3.14	FALSE	Yes	90	Chinese Shar Pei		3	Large	F	2014-01-31	FALSE	FALSE
6264	4739	2016-06-28	15	68.1429	477	1	1.30685	young	3.72	5.81	5.8	2.78	FALSE	Yes	95	Cockapoo / Cockerpoo / Spoodle (X Spaniel/Poodle)		2	Medium	F	2015-03-09	FALSE	FALSE
6267	4740	2016-06-28	31	135.143	946	2	2.59178	young	3.34	5.56	5.35	2.52	FALSE	Yes	284	Bull Terrier - Staffordshire		2	Medium	M	2013-11-25	FALSE	FALSE
6269	4742	2016-06-28	13	57.5714	403	1	1.10411	young	3.41	2.54	3.64	4.26	FALSE	Yes	40	Bearded Collie		3	Large	F	2015-05-22	FALSE	FALSE
6272	4745	2016-06-28	24	104.714	733	2	2.00822	young	3.68	4.96	5.8	4.01	FALSE	Yes	86	Chihuahua - Long Coat		1	Small	F	2014-06-26	FALSE	FALSE
6275	4747	2016-06-28	35	154	1078	2	2.95342	young	3.85	6	6	4.26	FALSE	Yes	177	Retriever - Labrador		3	Large	M	2013-07-16	FALSE	FALSE
6276	4748	2016-06-28	6	28	196	0	0.536986	young	3.46	6	5.47	2.9	FALSE	Yes	95	Cockapoo / Cockerpoo / Spoodle (X Spaniel/Poodle)		2	Medium	M	2015-12-15	FALSE	FALSE
6279	4750	2016-06-28	11	48.7143	341	0	0.934247	young	3.5	6	5.81	3.55	FALSE	Yes	94	Spaniel - Clumber		2	Medium	F	2015-07-23	FALSE	FALSE
6286	4596	2016-06-28	136	595	4165	11	11.411	old	2.25	4.05	5.8	3.19	TRUE	Yes	177	Retriever - Labrador		3	Large	M	2005-02-01	FALSE	FALSE
6288	4755	2016-06-28	25	110.143	771	2	2.11233	young	4.09	5.91	5.9	2.85	FALSE	Yes	261	Shih Tzu		1	Small	F	2014-05-19	FALSE	FALSE
6255	4249	2016-06-27	42	183.857	1287	3	3.52603	young	4.15	6	6	4.26	FALSE	Yes	177	Retriever - Labrador		3	Large	M	2012-12-18	FALSE	TRUE
6247	4730	2016-06-26	131	573	4011	10	10.989	old	3.73	5.3	3.69	2.36	TRUE	Yes	163	Jack/Parson Russell Terrier		1	Small	F	2005-07-03	FALSE	FALSE
6248	4212	2016-06-26	5	23.7143	166	0	0.454795	young	2.32	4.41	4.34	2.13	FALSE	Yes	177	Retriever - Labrador		3	Large	M	2016-01-12	FALSE	FALSE
6237	2850	2016-06-25	69	302.857	2120	5	5.80822	middle-aged	3.22	6	5.81	2.1	FALSE	Yes	274	Spaniel - English Springer		2	Medium	M	2010-09-05	FALSE	FALSE
6238	4727	2016-06-25	34	151	1057	2	2.89589	young	4.08	6	6	4.26	FALSE	Yes	274	Spaniel - English Springer		2	Medium	F	2013-08-03	FALSE	FALSE
6239	4728	2016-06-25	27	118.714	831	2	2.27671	young	3.71	4.93	5.26	2.68	FALSE	Yes	64	Boxer		3	Large	F	2014-03-17	FALSE	FALSE
6240	4400	2016-06-25	11	48.2857	338	0	0.926027	young	3.27	6	5.06	0.54	FALSE	Yes	231	Pug		1	Small	M	2015-07-23	FALSE	TRUE
6241	4729	2016-06-25	158	688.714	4821	13	13.2082	old	2.23	4.72	5.7	1.87	TRUE	Yes	284	Bull Terrier - Staffordshire		2	Medium	M	2003-04-14	FALSE	FALSE
6224	4209	2016-06-24	56	246.143	1723	4	4.72055	middle-aged	4.15	6	6	4.26	FALSE	Yes	284	Bull Terrier - Staffordshire		2	Medium	M	2011-10-06	FALSE	FALSE
6225	4208	2016-06-24	83	361.571	2531	6	6.93425	middle-aged	4.07	6	6	4.01	TRUE	Yes	226	Poodle (Toy)		1	Small	M	2009-07-20	FALSE	FALSE
6226	4207	2016-06-24	132	574.143	4019	11	11.011	old	3.84	5.8	5.48	4.26	TRUE	Yes	128	German Shepherd / Alsatian		3	Large	F	2005-06-23	FALSE	FALSE
6230	4179	2016-06-24	53	231.714	1622	4	4.44384	middle-aged	3.52	5.61	6	2.9	FALSE	Yes	128	German Shepherd / Alsatian		3	Large	F	2012-01-15	FALSE	FALSE
6231	2656	2016-06-24	49	216.571	1516	4	4.15342	middle-aged	3.91	6	5.7	3.14	FALSE	Yes	231	Pug		1	Small	F	2012-04-30	FALSE	FALSE
6213	4716	2016-06-23	6	29.8571	209	0	0.572603	young	3.59	6	5.9	3.19	FALSE	Yes	261	Shih Tzu		1	Small	M	2015-11-27	FALSE	FALSE
6214	4717	2016-06-23	54	238	1666	4	4.56438	middle-aged	3.93	5.39	6	4.26	FALSE	Yes	186	Lurcher		3	Large	M	2011-12-01	FALSE	FALSE
6215	4138	2016-06-23	81	356.286	2494	6	6.83288	middle-aged	4.15	5.48	6	3.97	TRUE	Yes	186	Lurcher		3	Large	M	2009-08-25	FALSE	FALSE
6216	3542	2016-06-23	106	461.857	3233	8	8.85753	old	3.77	6	5.9	3.72	TRUE	Yes	103	Dachshund (Standard)		2	Medium	F	2007-08-17	FALSE	TRUE
6217	4718	2016-06-23	35	153.429	1074	2	2.94247	young	2.82	5.37	6	2.52	FALSE	Yes	309	Yorkshire Terrier		1	Small	F	2013-07-15	FALSE	FALSE
6218	4719	2016-06-23	30	133.571	935	2	2.56164	young	3.96	6	6	3.68	FALSE	Yes	144	Greyhound		3	Large	F	2013-12-01	FALSE	FALSE
6221	4721	2016-06-23	74	323.143	2262	6	6.19726	middle-aged	3.58	5.54	6	4.26	FALSE	Yes	74	Cairn Terrier		1	Small	M	2010-04-14	FALSE	FALSE
6204	4713	2016-06-22	109	474.286	3320	9	9.09589	old	3.72	5.83	5.71	4.09	TRUE	Yes	64	Boxer		3	Large	F	2007-05-21	FALSE	TRUE
6205	4199	2016-06-22	10	45.4286	318	0	0.871233	young	3.76	6	6	2.45	FALSE	Yes	101	Cross Breed (Unknown X )/ Mongrel		4	Extra Large	F	2015-08-09	FALSE	FALSE
6206	4200	2016-06-22	20	88.8571	622	1	1.70411	young	3.52	5.82	5.9	3.43	FALSE	Yes	101	Cross Breed (Unknown X )/ Mongrel		4	Extra Large	F	2014-10-09	FALSE	FALSE
6208	4714	2016-06-22	6	28	196	0	0.536986	young	3.69	5.39	5.81	3.55	FALSE	Yes	128	German Shepherd / Alsatian		3	Large	F	2015-12-09	FALSE	FALSE
6197	4709	2016-06-21	66	290	2030	5	5.56164	middle-aged	3.38	5.82	5.8	4.26	FALSE	Yes	199	Schnauzer (Miniature)		1	Small	F	2010-11-30	FALSE	FALSE
6199	4147	2016-06-21	90	392	2744	7	7.51781	middle-aged	3.9	6	6	3.97	TRUE	Yes	128	German Shepherd / Alsatian		3	Large	F	2008-12-16	FALSE	FALSE
6182	4699	2016-06-20	53	230.429	1613	4	4.41918	middle-aged	4.15	6	6	3.97	FALSE	Yes	152	Hungarian Vizsla		3	Large	F	2012-01-20	FALSE	FALSE
6187	2675	2016-06-20	141	614.571	4302	11	11.7863	old	3.92	4.97	4.89	3.77	TRUE	Yes	101	Cross Breed (Unknown X )/ Mongrel		4	Extra Large	F	2004-09-09	FALSE	FALSE
6188	4702	2016-06-20	38	168.429	1179	3	3.23014	young	3.58	5.82	5.9	3.72	FALSE	Yes	40	Bearded Collie		3	Large	F	2013-03-29	FALSE	TRUE
6189	4703	2016-06-20	38	168.429	1179	3	3.23014	young	3.94	6	5.9	3.43	FALSE	Yes	40	Bearded Collie		3	Large	F	2013-03-29	FALSE	TRUE
6190	4704	2016-06-20	62	272.429	1907	5	5.22466	middle-aged	3.02	4.46	3.66	2.49	FALSE	Yes	5	Mixed (Medium)		2	Medium	F	2011-04-01	FALSE	FALSE
6169	3530	2016-06-19	14	61.4286	430	1	1.17808	young	3.41	6	5.81	3.55	FALSE	Yes	1	Other (Small)		1	Small	F	2015-04-16	FALSE	FALSE
6171	1357	2016-06-19	60	264.714	1853	5	5.07671	middle-aged	3.67	5.9	5.9	3.72	FALSE	Yes	155	Setter - Irish Red and White		3	Large	F	2011-05-24	FALSE	FALSE
6174	4038	2016-06-19	33	144.571	1012	2	2.7726	young	4.15	6	5.24	4.26	FALSE	Yes	231	Pug		1	Small	M	2013-09-11	FALSE	FALSE
6175	3564	2016-06-19	12	54.8571	384	1	1.05205	young	4.03	5.9	6	3.97	FALSE	Yes	96	Spaniel - English Cocker		2	Medium	M	2015-06-01	FALSE	FALSE
6176	3677	2016-06-19	24	104.857	734	2	2.01096	young	3.76	6	5.81	3.26	FALSE	Yes	4	Mixed (Small)		1	Small	F	2014-06-16	FALSE	TRUE
6177	4695	2016-06-19	31	136.714	957	2	2.62192	young	3.36	4.76	5.42	2.98	FALSE	Yes	5	Mixed (Medium)		2	Medium	M	2013-11-05	FALSE	FALSE
6178	4696	2016-06-19	31	136.714	957	2	2.62192	young	3.65	5.33	4.41	2.48	FALSE	Yes	5	Mixed (Medium)		2	Medium	M	2013-11-05	FALSE	FALSE
6162	1846	2016-06-18	28	125.714	880	2	2.41096	young	4.15	6	6	4.26	FALSE	Yes	101	Cross Breed (Unknown X )/ Mongrel		4	Extra Large	M	2014-01-20	FALSE	FALSE
6163	4023	2016-06-18	6	27.2857	191	0	0.523288	young	3.33	5.33	5.11	3.55	FALSE	Yes	199	Schnauzer (Miniature)		1	Small	F	2015-12-10	FALSE	FALSE
6168	4694	2016-06-18	15	65.4286	458	1	1.25479	young	4.15	6	6	4.26	FALSE	Yes	137	Goldendoodle (X Golden Retriever/Poodle)		3	Large	F	2015-03-18	FALSE	FALSE
6154	4685	2016-06-17	32	143.143	1002	2	2.74521	young	3.49	5.72	5.47	0.54	FALSE	Yes	163	Jack/Parson Russell Terrier		1	Small	M	2013-09-19	FALSE	FALSE
6156	4688	2016-06-17	33	143.429	1004	2	2.75068	young	4.15	6	6	3.48	FALSE	Yes	183	Lhasa Apso		1	Small	M	2013-09-17	FALSE	FALSE
6159	4689	2016-06-17	108	469.714	3288	9	9.00822	old	4.15	5.39	6	2.65	TRUE	Yes	183	Lhasa Apso		1	Small	M	2007-06-17	FALSE	FALSE
6133	4669	2016-06-16	5	21.8571	153	0	0.419178	young	3.7	6	6	4.26	FALSE	Yes	252	Schnauzer (Standard)		2	Medium	M	2016-01-15	FALSE	FALSE
6135	4671	2016-06-16	45	197.286	1381	3	3.78356	young	4	5.81	6	1.87	FALSE	Yes	103	Dachshund (Standard)		2	Medium	M	2012-09-04	FALSE	TRUE
6137	4193	2016-06-16	81	355.714	2490	6	6.82192	middle-aged	4.15	5.38	6	4.26	TRUE	Yes	303	West Highland White Terrier		1	Small	M	2009-08-22	FALSE	FALSE
6138	4108	2016-06-16	74	323.714	2266	6	6.20822	middle-aged	3.61	4.83	5.12	2.52	FALSE	Yes	128	German Shepherd / Alsatian		3	Large	M	2010-04-03	FALSE	FALSE
6141	4674	2016-06-16	23	100.857	706	1	1.93425	young	4.08	6	6	3.14	FALSE	Yes	163	Jack/Parson Russell Terrier		1	Small	M	2014-07-11	FALSE	TRUE
6142	4675	2016-06-16	20	88.2857	618	1	1.69315	young	4.15	6	6	4.26	FALSE	Yes	177	Retriever - Labrador		3	Large	F	2014-10-07	FALSE	TRUE
6143	4074	2016-06-16	81	355.286	2487	6	6.8137	middle-aged	4.08	6	6	3.97	TRUE	Yes	186	Lurcher		3	Large	M	2009-08-25	FALSE	FALSE
6144	4676	2016-06-16	138	602	4214	11	11.5452	old	4.15	6	5.85	4.26	TRUE	Yes	163	Jack/Parson Russell Terrier		1	Small	M	2004-12-02	FALSE	TRUE
6145	4677	2016-06-16	17	77	539	1	1.47671	young	4.03	5.39	5.49	3.43	FALSE	Yes	177	Retriever - Labrador		3	Large	F	2014-12-25	FALSE	FALSE
6150	4681	2016-06-16	49	213.286	1493	4	4.09041	middle-aged	3.89	6	6	4.26	FALSE	Yes	186	Lurcher		3	Large	M	2012-05-15	FALSE	FALSE
6151	4682	2016-06-16	163	710	4970	13	13.6164	old	2.16	5.15	4.52	3.13	TRUE	Yes	186	Lurcher		3	Large	F	2002-11-07	FALSE	FALSE
6153	4684	2016-06-16	91	399.571	2797	7	7.66301	middle-aged	3.99	5.48	6	2.52	TRUE	Yes	5	Mixed (Medium)		2	Medium	F	2008-10-19	FALSE	TRUE
6107	4652	2016-06-15	10	45.4286	318	0	0.871233	young	3.97	6	6	3.97	FALSE	Yes	274	Spaniel - English Springer		2	Medium	M	2015-08-02	FALSE	FALSE
6116	4657	2016-06-15	14	64.8571	454	1	1.24384	young	3.54	5.82	6	4.26	FALSE	Yes	38	Beagle		2	Medium	M	2015-03-19	FALSE	FALSE
6117	4658	2016-06-15	21	91.4286	640	1	1.75342	young	3	5.36	5.61	2.85	FALSE	Yes	183	Lhasa Apso		1	Small	F	2014-09-14	FALSE	FALSE
6118	4659	2016-06-15	63	277.286	1941	5	5.31781	middle-aged	4.03	5.92	6	4.26	FALSE	Yes	136	Retriever - Golden		3	Large	M	2011-02-21	FALSE	FALSE
6119	4089	2016-06-15	10	44.7143	313	0	0.857534	young	3.73	6	5.41	4.01	FALSE	Yes	6	Mixed (Large)		3	Large	M	2015-08-07	FALSE	FALSE
6121	4661	2016-06-15	107	468.714	3281	8	8.98904	old	4.09	5.9	6	2.85	TRUE	Yes	64	Boxer		3	Large	F	2007-06-22	FALSE	TRUE
6123	4662	2016-06-15	104	454.571	3182	8	8.71781	old	3.07	4.67	4.96	1.25	TRUE	Yes	5	Mixed (Medium)		2	Medium	M	2007-09-29	FALSE	FALSE
6125	4664	2016-06-15	104	454.571	3182	8	8.71781	old	3.03	5.46	5.46	1.16	TRUE	Yes	4	Mixed (Small)		1	Small	M	2007-09-29	FALSE	FALSE
6127	4039	2016-06-15	36	160	1120	3	3.06849	young	4.15	6	6	4.26	FALSE	Yes	177	Retriever - Labrador		3	Large	M	2013-05-22	FALSE	TRUE
6130	2170	2016-06-15	17	73.8571	517	1	1.41644	young	3.54	5.62	5.36	2.93	FALSE	Yes	136	Retriever - Golden		3	Large	F	2015-01-15	FALSE	FALSE
6062	4622	2016-06-14	23	101.143	708	1	1.93973	young	4.01	6	6	3.97	FALSE	Yes	199	Schnauzer (Miniature)		1	Small	M	2014-07-07	FALSE	FALSE
6063	2743	2016-06-14	149	648.429	4539	12	12.4356	old	4.15	6	6	4.01	TRUE	Yes	292	Tibetan Terrier		2	Medium	M	2004-01-10	FALSE	FALSE
6064	4623	2016-06-14	118	516.571	3616	9	9.90685	old	3.92	5.91	5.57	3.91	TRUE	Yes	72	Bulldog - British		2	Medium	F	2006-07-21	FALSE	FALSE
6065	4624	2016-06-14	5	24.2857	170	0	0.465753	young	3.54	5.9	5.8	2.81	FALSE	Yes	58	Bolognese		1	Small	F	2015-12-27	FALSE	FALSE
6066	2332	2016-06-14	65	285.571	1999	5	5.47671	middle-aged	3.37	5.49	5.9	3.72	FALSE	Yes	274	Spaniel - English Springer		2	Medium	M	2010-12-24	FALSE	FALSE
6068	4626	2016-06-14	13	57.7143	404	1	1.10685	young	4.15	6	6	4.26	FALSE	Yes	96	Spaniel - English Cocker		2	Medium	M	2015-05-07	FALSE	FALSE
6069	4627	2016-06-14	42	186	1302	3	3.56712	young	3.16	4.99	6	2.61	FALSE	Yes	59	Border Collie		2	Medium	M	2012-11-20	FALSE	FALSE
6070	4628	2016-06-14	71	312.429	2187	5	5.99178	middle-aged	3.55	4.73	5.16	3.74	FALSE	Yes	64	Boxer		3	Large	M	2010-06-19	FALSE	FALSE
6071	4629	2016-06-14	40	175.571	1229	3	3.36712	young	4.15	6	6	4.26	FALSE	Yes	136	Retriever - Golden		3	Large	M	2013-02-01	FALSE	FALSE
6072	4630	2016-06-14	25	109.857	769	2	2.10685	young	3.63	6	5.9	3.97	FALSE	Yes	177	Retriever - Labrador		3	Large	M	2014-05-07	FALSE	TRUE
6073	4631	2016-06-14	38	167.571	1173	3	3.2137	young	2.55	5.53	5.7	3.19	FALSE	Yes	189	Maltese		1	Small	M	2013-03-29	FALSE	FALSE
6087	2119	2016-06-14	17	76.8571	538	1	1.47397	young	4.07	6	6	3.68	FALSE	Yes	4	Mixed (Small)		1	Small	F	2014-12-24	FALSE	FALSE
6088	1100	2016-06-14	21	91.5714	641	1	1.75616	young	4.15	6	6	3.97	FALSE	Yes	59	Border Collie		2	Medium	M	2014-09-12	FALSE	FALSE
6095	4644	2016-06-14	7	33.7143	236	0	0.646575	young	3.79	5.34	5.9	3.43	FALSE	Yes	177	Retriever - Labrador		3	Large	M	2015-10-22	FALSE	FALSE
6098	4646	2016-06-14	8	37.8571	265	0	0.726027	young	3.96	6	6	4.26	FALSE	Yes	304	Whippet		2	Medium	F	2015-09-23	FALSE	FALSE
6101	4648	2016-06-14	22	98.2857	688	1	1.88493	young	4.03	6	6	3.97	FALSE	Yes	261	Shih Tzu		1	Small	F	2014-07-27	FALSE	TRUE
6049	4616	2016-06-13	73	321.714	2252	6	6.16986	middle-aged	4	6	6	2.56	FALSE	Yes	252	Schnauzer (Standard)		2	Medium	F	2010-04-14	FALSE	FALSE
6057	4619	2016-06-13	44	195.286	1367	3	3.74521	young	2.11	3.98	3.94	2.42	FALSE	Yes	309	Yorkshire Terrier		1	Small	M	2012-09-15	FALSE	FALSE
6060	4620	2016-06-13	35	155.571	1089	2	2.98356	young	3.91	5.91	6	4.26	FALSE	Yes	96	Spaniel - English Cocker		2	Medium	M	2013-06-20	FALSE	FALSE
6039	4182	2016-06-12	6	28	196	0	0.536986	young	3.35	5.09	4.82	2.86	FALSE	Yes	231	Pug		1	Small	M	2015-11-29	FALSE	FALSE
6025	4137	2016-06-11	11	48.5714	340	0	0.931507	young	3.72	5.21	6	3.43	FALSE	Yes	95	Cockapoo / Cockerpoo / Spoodle (X Spaniel/Poodle)		2	Medium	M	2015-07-07	FALSE	FALSE
6028	3931	2016-06-11	5	26	182	0	0.49863	young	4.15	5.39	6	4.26	FALSE	Yes	101	Cross Breed (Unknown X )/ Mongrel		4	Extra Large	M	2015-12-12	FALSE	FALSE
6030	4609	2016-06-11	13	56.8571	398	1	1.09041	young	3.73	6	5.7	3.72	FALSE	Yes	231	Pug		1	Small	M	2015-05-10	FALSE	FALSE
6031	2106	2016-06-11	16	70.2857	492	1	1.34795	young	3.4	5.36	4.54	2.14	FALSE	Yes	5	Mixed (Medium)		2	Medium	M	2015-02-05	FALSE	FALSE
6032	4610	2016-06-11	26	115.857	811	2	2.22192	young	4.15	6	6	1.04	FALSE	Yes	128	German Shepherd / Alsatian		3	Large	F	2014-03-23	FALSE	FALSE
6019	2409	2016-06-10	203	886.714	6207	16	17.0055	old	3	5.91	5.8	4.26	TRUE	Yes	6	Mixed (Large)		3	Large	M	1999-06-13	FALSE	FALSE
6021	4153	2016-06-10	12	55.2857	387	1	1.06027	young	4.15	6	6	4.26	FALSE	Yes	162	Jack Chi (X Jack Russell/Chihuahua)		1	Small	M	2015-05-20	FALSE	FALSE
6010	4603	2016-06-09	6	27.2857	191	0	0.523288	young	4.15	6	6	4.26	FALSE	Yes	231	Pug		1	Small	M	2015-12-01	FALSE	FALSE
6012	4604	2016-06-09	114	499.429	3496	9	9.57808	old	3.77	5.91	5.9	4.26	TRUE	Yes	5	Mixed (Medium)		2	Medium	M	2006-11-13	FALSE	TRUE
6017	4606	2016-06-09	74	324.429	2271	6	6.22192	middle-aged	3.71	5.81	5.9	4.01	FALSE	Yes	128	German Shepherd / Alsatian		3	Large	F	2010-03-22	FALSE	TRUE
5998	4597	2016-06-08	26	116.429	815	2	2.23288	young	3.85	6	5.91	3.55	FALSE	Yes	4	Mixed (Small)		1	Small	M	2014-03-16	FALSE	FALSE
5999	4598	2016-06-08	62	272.429	1907	5	5.22466	middle-aged	4.01	5.3	6	4.26	FALSE	Yes	82	King Charles Spaniel - Cavalier		1	Small	F	2011-03-20	FALSE	TRUE
6001	4599	2016-06-08	172	750	5250	14	14.3836	old	3.51	6	5.12	4.09	TRUE	Yes	213	Papillon		1	Small	F	2002-01-23	FALSE	FALSE
6003	3526	2016-06-08	11	50.5714	354	0	0.969863	young	3.94	5.21	4.65	2.99	FALSE	Yes	177	Retriever - Labrador		3	Large	M	2015-06-20	FALSE	FALSE
6007	4601	2016-06-08	137	596	4172	11	11.4301	old	3.36	5.05	5.69	3.55	TRUE	Yes	138	Setter - Gordon		3	Large	F	2005-01-05	FALSE	FALSE
5990	4099	2016-06-07	8	36.1429	253	0	0.693151	young	4.15	6	6	2.94	FALSE	Yes	274	Spaniel - English Springer		2	Medium	F	2015-09-28	FALSE	FALSE
5993	3051	2016-06-07	14	61	427	1	1.16986	young	4.15	6	6	3.68	FALSE	Yes	95	Cockapoo / Cockerpoo / Spoodle (X Spaniel/Poodle)		2	Medium	M	2015-04-07	FALSE	FALSE
5994	3052	2016-06-07	43	189.143	1324	3	3.6274	young	4.07	6	6	4.26	FALSE	Yes	82	King Charles Spaniel - Cavalier		1	Small	F	2012-10-22	FALSE	FALSE
5979	4112	2016-06-06	127	552.286	3866	10	10.5918	old	2.71	4.67	5.01	3.13	TRUE	Yes	163	Jack/Parson Russell Terrier		1	Small	M	2005-11-05	FALSE	TRUE
5985	4588	2016-06-06	36	160.429	1123	3	3.07671	young	3.92	6	5.36	4.01	FALSE	Yes	177	Retriever - Labrador		3	Large	F	2013-05-10	FALSE	FALSE
5986	4589	2016-06-06	4	20.7143	145	0	0.39726	young	3.96	6	6	2.78	FALSE	Yes	177	Retriever - Labrador		3	Large	M	2016-01-13	FALSE	FALSE
5965	4585	2016-06-04	51	225.571	1579	4	4.32603	middle-aged	3.99	5.39	6	4.26	FALSE	Yes	52	Bichon Frise		1	Small	M	2012-02-07	FALSE	TRUE
5969	3670	2016-06-04	12	55.5714	389	1	1.06575	young	3.4	5.15	5.17	3.55	FALSE	Yes	309	Yorkshire Terrier		1	Small	M	2015-05-12	FALSE	FALSE
5956	4580	2016-06-03	6	27.8571	195	0	0.534247	young	4.15	6	6	4.26	FALSE	Yes	261	Shih Tzu		1	Small	M	2015-11-21	FALSE	FALSE
5957	4582	2016-06-03	4	19.7143	138	0	0.378082	young	3.19	5.25	5.57	4.26	FALSE	Yes	95	Cockapoo / Cockerpoo / Spoodle (X Spaniel/Poodle)		2	Medium	F	2016-01-17	FALSE	FALSE
5963	4584	2016-06-03	27	121.429	850	2	2.32877	young	4.15	6	5.28	3.43	FALSE	Yes	95	Cockapoo / Cockerpoo / Spoodle (X Spaniel/Poodle)		2	Medium	F	2014-02-04	FALSE	TRUE
5950	2742	2016-06-02	115	503.286	3523	9	9.65205	old	4.15	6	6	4.26	TRUE	Yes	292	Tibetan Terrier		2	Medium	F	2006-10-10	FALSE	FALSE
5928	4571	2016-05-31	128	559.571	3917	10	10.7315	old	2.01	4.08	5.24	2.19	TRUE	Yes	183	Lhasa Apso		1	Small	M	2005-09-09	FALSE	FALSE
5933	4572	2016-05-31	17	74.1429	519	1	1.42192	young	3.96	5.39	4.98	3.74	FALSE	Yes	176	Labradoodle (X Labrador/Poodle)		3	Large	M	2014-12-29	FALSE	FALSE
5920	3464	2016-05-30	147	643.143	4502	12	12.3342	old	2.08	3.99	3.94	2.13	TRUE	Yes	4	Mixed (Small)		1	Small	M	2004-02-01	FALSE	FALSE
5922	4568	2016-05-30	16	70.2857	492	1	1.34795	young	4.15	6	6	4.26	FALSE	Yes	274	Spaniel - English Springer		2	Medium	F	2015-01-24	FALSE	FALSE
5923	4569	2016-05-30	47	207.429	1452	3	3.97808	young	4.03	6	5.88	4.26	FALSE	Yes	274	Spaniel - English Springer		2	Medium	M	2012-06-08	FALSE	FALSE
5924	4078	2016-05-30	69	304.286	2130	5	5.83562	middle-aged	4.15	6	6	4.26	FALSE	Yes	284	Bull Terrier - Staffordshire		2	Medium	M	2010-07-31	FALSE	FALSE
5926	4570	2016-05-30	63	274	1918	5	5.25479	middle-aged	4.03	6	6	3.52	FALSE	Yes	274	Spaniel - English Springer		2	Medium	M	2011-02-28	FALSE	TRUE
5912	3700	2016-05-29	4	20.7143	145	0	0.39726	young	3.52	5.82	5.37	2.39	FALSE	Yes	124	Bulldog - French		1	Small	F	2016-01-05	FALSE	FALSE
5913	3458	2016-05-29	20	90.2857	632	1	1.73151	young	4.06	6	6	3.97	FALSE	Yes	59	Border Collie		2	Medium	F	2014-09-05	FALSE	FALSE
5915	1199	2016-05-29	45	195.714	1370	3	3.75342	young	3.78	6	5.9	2.9	FALSE	Yes	6	Mixed (Large)		3	Large	M	2012-08-28	FALSE	FALSE
5905	3717	2016-05-28	135	587.143	4110	11	11.2603	old	3.3	4.54	4.77	2.48	TRUE	Yes	274	Spaniel - English Springer		2	Medium	M	2005-02-25	FALSE	FALSE
5897	4061	2016-05-27	102	447.143	3130	8	8.57534	old	3.4	4.38	4.79	3.84	TRUE	Yes	101	Cross Breed (Unknown X )/ Mongrel		4	Extra Large	M	2007-11-01	FALSE	TRUE
5898	4561	2016-05-27	48	209	1463	4	4.00822	middle-aged	3.45	5.53	5.9	1.04	FALSE	Yes	98	Collie - Rough Coat		2	Medium	M	2012-05-25	FALSE	FALSE
5902	4562	2016-05-27	67	292	2044	5	5.6	middle-aged	4.08	6	5.47	2.48	FALSE	Yes	60	Border Terrier		1	Small	F	2010-10-22	FALSE	FALSE
5871	3011	2016-05-25	14	61.2857	429	1	1.17534	young	4.15	6	6	4.26	FALSE	Yes	124	Bulldog - French		1	Small	M	2015-03-23	FALSE	FALSE
5874	4552	2016-05-25	9	42.7143	299	0	0.819178	young	4.15	6	6	4.26	FALSE	Yes	42	Bedlington Terrier		2	Medium	F	2015-07-31	FALSE	FALSE
5876	4554	2016-05-25	37	165	1155	3	3.16438	young	4.01	6	5.9	4.26	FALSE	Yes	163	Jack/Parson Russell Terrier		1	Small	M	2013-03-27	FALSE	FALSE
5880	4557	2016-05-25	23	101.286	709	1	1.94247	young	3.91	6	6	3.97	FALSE	Yes	101	Cross Breed (Unknown X )/ Mongrel		4	Extra Large	F	2014-06-16	FALSE	TRUE
5881	3568	2016-05-25	64	281	1967	5	5.38904	middle-aged	3.87	5.79	6	3.97	FALSE	Yes	101	Cross Breed (Unknown X )/ Mongrel		4	Extra Large	M	2011-01-05	FALSE	TRUE
5866	4548	2016-05-24	96	418.429	2929	8	8.02466	old	3.7	6	5.36	2.32	TRUE	Yes	177	Retriever - Labrador		3	Large	F	2008-05-17	FALSE	FALSE
5868	4549	2016-05-24	85	373	2611	7	7.15342	middle-aged	3.43	5.01	5.57	3.01	TRUE	Yes	96	Spaniel - English Cocker		2	Medium	F	2009-03-31	FALSE	FALSE
5860	1329	2016-05-23	19	86.4286	605	1	1.65753	young	4.15	6	6	4.26	FALSE	Yes	82	King Charles Spaniel - Cavalier		1	Small	F	2014-09-26	FALSE	FALSE
5863	4545	2016-05-23	94	409.143	2864	7	7.84658	middle-aged	2.79	4.67	4.57	4.09	TRUE	Yes	177	Retriever - Labrador		3	Large	M	2008-07-20	FALSE	FALSE
5864	4546	2016-05-23	26	114	798	2	2.1863	young	4.15	6	6	4.26	FALSE	Yes	101	Cross Breed (Unknown X )/ Mongrel		4	Extra Large	M	2014-03-17	FALSE	TRUE
5856	2937	2016-05-22	15	67.1429	470	1	1.28767	young	4.15	6	6	4.26	FALSE	Yes	59	Border Collie		2	Medium	F	2015-02-07	FALSE	FALSE
5849	4540	2016-05-21	44	191.429	1340	3	3.67123	young	4.03	5.43	6	4.26	FALSE	Yes	136	Retriever - Golden		3	Large	M	2012-09-19	FALSE	FALSE
5838	3484	2016-05-20	16	70.2857	492	1	1.34795	young	3.63	5.91	6	4.26	FALSE	Yes	38	Beagle		2	Medium	F	2015-01-14	FALSE	FALSE
5839	4536	2016-05-20	39	172.286	1206	3	3.30411	young	3.86	6	5.81	3.06	FALSE	Yes	5	Mixed (Medium)		2	Medium	M	2013-01-30	FALSE	FALSE
5823	4529	2016-05-19	28	124.143	869	2	2.38082	young	4.07	5.69	6	3.43	FALSE	Yes	128	German Shepherd / Alsatian		3	Large	F	2014-01-01	FALSE	FALSE
5824	4530	2016-05-19	27	121.143	848	2	2.32329	young	3.56	6	6	4.26	FALSE	Yes	6	Mixed (Large)		3	Large	M	2014-01-22	FALSE	FALSE
5825	4531	2016-05-19	28	124.143	869	2	2.38082	young	3.41	6	5.9	3.39	FALSE	Yes	4	Mixed (Small)		1	Small	F	2014-01-01	FALSE	FALSE
5826	4532	2016-05-19	108	470.286	3292	9	9.01918	old	3.68	6	5.46	2.32	TRUE	Yes	215	Patterdale Terrier		1	Small	M	2007-05-15	FALSE	FALSE
5829	2653	2016-05-19	76	332.857	2330	6	6.38356	middle-aged	3.77	5.91	5.9	4.01	FALSE	Yes	99	Collie - Smooth Coat		2	Medium	F	2010-01-01	FALSE	FALSE
5833	4535	2016-05-19	67	293.857	2057	5	5.63562	middle-aged	3.36	5.48	5.7	4.26	FALSE	Yes	144	Greyhound		3	Large	M	2010-10-01	FALSE	FALSE
5818	4525	2016-05-18	111	486.286	3404	9	9.32603	old	2.08	5.43	5.29	3.01	TRUE	Yes	163	Jack/Parson Russell Terrier		1	Small	M	2007-01-22	FALSE	FALSE
5821	3189	2016-05-18	68	299.714	2098	5	5.74795	middle-aged	3.84	6	5.9	4.26	FALSE	Yes	177	Retriever - Labrador		3	Large	F	2010-08-20	FALSE	TRUE
5813	4522	2016-05-17	98	426.857	2988	8	8.1863	old	3.55	5.12	5.07	2.35	TRUE	Yes	82	King Charles Spaniel - Cavalier		1	Small	M	2008-03-12	FALSE	FALSE
5793	3829	2016-05-16	6	27.7143	194	0	0.531507	young	3.51	5.91	5.36	3.22	FALSE	Yes	101	Cross Breed (Unknown X )/ Mongrel		4	Extra Large	F	2015-11-04	FALSE	FALSE
5795	1269	2016-05-16	132	574.143	4019	11	11.011	old	4.15	6	6	4.26	TRUE	Yes	177	Retriever - Labrador		3	Large	F	2005-05-15	FALSE	FALSE
5784	4515	2016-05-14	29	127.143	890	2	2.43836	young	4.15	5.39	6	4.26	FALSE	Yes	176	Labradoodle (X Labrador/Poodle)		3	Large	F	2013-12-06	FALSE	TRUE
5785	1604	2016-05-14	65	284.429	1991	5	5.45479	middle-aged	3.95	5.3	5.38	4.09	FALSE	Yes	6	Mixed (Large)		3	Large	M	2010-12-01	FALSE	FALSE
5774	3986	2016-05-13	5	24	168	0	0.460274	young	3.95	5.7	6	3.68	FALSE	Yes	96	Spaniel - English Cocker		2	Medium	M	2015-11-27	FALSE	FALSE
5777	4512	2016-05-13	13	59.8571	419	1	1.14795	young	3.27	5.91	5.89	4.26	FALSE	Yes	4	Mixed (Small)		1	Small	M	2015-03-21	FALSE	FALSE
5778	4513	2016-05-13	9	42.4286	297	0	0.813699	young	4.15	6	6	4.26	FALSE	Yes	4	Mixed (Small)		1	Small	F	2015-07-21	FALSE	FALSE
5781	2654	2016-05-13	87	379.571	2657	7	7.27945	middle-aged	3.87	5.82	5.43	3.26	TRUE	Yes	59	Border Collie		2	Medium	F	2009-02-02	FALSE	FALSE
5757	1108	2016-05-12	31	138.857	972	2	2.66301	young	4.06	5.49	6	4.26	FALSE	Yes	96	Spaniel - English Cocker		2	Medium	M	2013-09-13	FALSE	FALSE
5758	4497	2016-05-12	75	326	2282	6	6.25205	middle-aged	3.98	6	5.36	3.97	FALSE	Yes	298	Weimaraner		3	Large	M	2010-02-11	FALSE	FALSE
5760	4499	2016-05-12	51	223.143	1562	4	4.27945	middle-aged	3.75	6	6	4.26	FALSE	Yes	5	Mixed (Medium)		2	Medium	M	2012-02-01	FALSE	FALSE
5761	4501	2016-05-12	6	29	203	0	0.556164	young	3.31	5.69	5.8	2.94	FALSE	Yes	163	Jack/Parson Russell Terrier		1	Small	F	2015-10-22	FALSE	FALSE
5735	4484	2016-05-11	120	522.143	3655	10	10.0137	old	3.8	6	6	4.26	TRUE	Yes	60	Border Terrier		1	Small	M	2006-05-09	FALSE	FALSE
5739	4487	2016-05-11	78	340.286	2382	6	6.52603	middle-aged	2.78	6	5.12	2.85	TRUE	Yes	199	Schnauzer (Miniature)		1	Small	F	2009-11-02	FALSE	FALSE
5742	3921	2016-05-11	54	238.143	1667	4	4.56712	middle-aged	3.31	5.91	4.14	4.26	FALSE	Yes	131	German Spitz (Mittel)		2	Medium	M	2011-10-18	FALSE	FALSE
5745	4488	2016-05-11	64	281.714	1972	5	5.40274	middle-aged	3.81	6	5.8	4.26	FALSE	Yes	177	Retriever - Labrador		3	Large	F	2010-12-17	FALSE	TRUE
5747	4490	2016-05-11	137	595.714	4170	11	11.4247	old	3.58	5.11	5.46	3.55	TRUE	Yes	284	Bull Terrier - Staffordshire		2	Medium	F	2004-12-10	FALSE	FALSE
5748	4493	2016-05-11	35	154.857	1084	2	2.96986	young	3.96	6	6	4.26	FALSE	Yes	304	Whippet		2	Medium	F	2013-05-23	FALSE	FALSE
5750	4494	2016-05-11	35	154.857	1084	2	2.96986	young	3.6	5.54	5.36	4.26	FALSE	Yes	304	Whippet		2	Medium	F	2013-05-23	FALSE	FALSE
5724	4477	2016-05-10	43	190.286	1332	3	3.64932	young	4.07	5.39	6	3.68	FALSE	Yes	5	Mixed (Medium)		2	Medium	M	2012-09-16	FALSE	FALSE
5725	3974	2016-05-10	5	23.7143	166	0	0.454795	young	3.8	5.32	5.89	2.85	FALSE	Yes	101	Cross Breed (Unknown X )/ Mongrel		4	Extra Large	F	2015-11-26	FALSE	FALSE
5728	2399	2016-05-10	45	197.571	1383	3	3.78904	young	3.52	6	5.8	2.85	FALSE	Yes	163	Jack/Parson Russell Terrier		1	Small	M	2012-07-27	FALSE	FALSE
5732	3204	2016-05-10	10	45.1429	316	0	0.865753	young	4.15	6	6	3.97	FALSE	Yes	64	Boxer		3	Large	F	2015-06-29	FALSE	FALSE
5734	4483	2016-05-10	14	62.1429	435	1	1.19178	young	3.77	6	6	4.26	FALSE	Yes	253	Schnoodle (X Schnauzer/Poodle)		2	Medium	M	2015-03-02	FALSE	FALSE
5708	3940	2016-05-08	33	143.571	1005	2	2.75342	young	4.15	5.39	6	3.68	FALSE	Yes	128	German Shepherd / Alsatian		3	Large	F	2013-08-07	FALSE	FALSE
5710	1964	2016-05-08	21	95.4286	668	1	1.83014	young	4.15	6	6	4.26	FALSE	Yes	96	Spaniel - English Cocker		2	Medium	F	2014-07-10	FALSE	FALSE
5711	4474	2016-05-08	10	46.2857	324	0	0.887671	young	4.15	6	6	4.26	FALSE	Yes	183	Lhasa Apso		1	Small	M	2015-06-19	FALSE	FALSE
5713	3988	2016-05-08	7	31	217	0	0.594521	young	4.15	6	6	4.26	FALSE	Yes	284	Bull Terrier - Staffordshire		2	Medium	M	2015-10-04	FALSE	FALSE
5707	4472	2016-05-07	5	25.5714	179	0	0.490411	young	3.89	5.8	6	2.85	FALSE	Yes	223	Pomeranian		1	Small	M	2015-11-10	FALSE	FALSE
5693	3933	2016-05-06	38	165.286	1157	3	3.16986	young	4.09	6	5.36	4.26	FALSE	Yes	72	Bulldog - British		2	Medium	M	2013-03-06	FALSE	FALSE
5696	3939	2016-05-06	56	247.143	1730	4	4.73973	middle-aged	3.4	5.82	5.12	2.97	FALSE	Yes	128	German Shepherd / Alsatian		3	Large	F	2011-08-11	FALSE	FALSE
5699	3943	2016-05-06	5	25.2857	177	0	0.484932	young	3.51	6	5.9	3.48	FALSE	Yes	199	Schnauzer (Miniature)		1	Small	M	2015-11-11	FALSE	FALSE
5700	3958	2016-05-06	32	142.571	998	2	2.73425	young	3.57	4.74	5.18	0.87	FALSE	Yes	183	Lhasa Apso		1	Small	F	2013-08-12	FALSE	FALSE
5689	4466	2016-05-05	95	416.286	2914	7	7.98356	middle-aged	3.69	5.15	5.38	2.43	TRUE	Yes	2	Other (Medium)		2	Medium	M	2008-05-13	FALSE	FALSE
5690	3736	2016-05-05	6	27.1429	190	0	0.520548	young	3.49	5.54	5.81	3.26	FALSE	Yes	87	Chihuahua - Smooth Coat		1	Small	M	2015-10-28	FALSE	FALSE
5676	4459	2016-05-03	48	209.286	1465	4	4.0137	middle-aged	4.09	6	6	4.26	FALSE	Yes	82	King Charles Spaniel - Cavalier		1	Small	M	2012-04-29	FALSE	FALSE
5677	4460	2016-05-03	21	93.8571	657	1	1.8	young	3.88	5.3	6	3.77	FALSE	Yes	5	Mixed (Medium)		2	Medium	M	2014-07-16	FALSE	TRUE
5670	4457	2016-05-02	4	19.7143	138	0	0.378082	young	3.8	5.39	5.36	3.43	FALSE	Yes	96	Spaniel - English Cocker		2	Medium	F	2015-12-16	FALSE	FALSE
5671	3913	2016-05-02	49	217.286	1521	4	4.16712	middle-aged	4.15	6	6	3.97	FALSE	Yes	101	Cross Breed (Unknown X )/ Mongrel		4	Extra Large	F	2012-03-03	FALSE	TRUE
5659	4453	2016-05-01	77	338.714	2371	6	6.49589	middle-aged	2.6	5.53	5.9	1.82	TRUE	Yes	252	Schnauzer (Standard)		2	Medium	M	2009-11-03	FALSE	FALSE
5661	4455	2016-05-01	23	102.857	720	1	1.9726	young	3.75	5.91	5.47	3.22	FALSE	Yes	136	Retriever - Golden		3	Large	M	2014-05-12	FALSE	FALSE
5663	3888	2016-05-01	35	153.571	1075	2	2.94521	young	3.45	6	5.17	3.55	FALSE	Yes	96	Spaniel - English Cocker		2	Medium	F	2013-05-22	FALSE	FALSE
5664	3890	2016-05-01	118	515.429	3608	9	9.88493	old	3.59	6	5.81	3.55	TRUE	Yes	96	Spaniel - English Cocker		2	Medium	F	2006-06-15	FALSE	FALSE
5666	2020	2016-05-01	37	161.286	1129	3	3.09315	young	3.7	5.4	5.41	3.51	FALSE	Yes	136	Retriever - Golden		3	Large	M	2013-03-29	FALSE	FALSE
5644	4444	2016-04-29	97	423.857	2967	8	8.12877	old	2.62	5.05	5.01	1.74	TRUE	Yes	245	Rhodesian Ridgeback		3	Large	F	2008-03-15	FALSE	FALSE
5645	4445	2016-04-29	11	48.5714	340	0	0.931507	young	4.01	6	6	3.39	FALSE	Yes	128	German Shepherd / Alsatian		3	Large	F	2015-05-25	FALSE	FALSE
5648	4448	2016-04-29	8	37.8571	265	0	0.726027	young	3.88	6	6	4.26	FALSE	Yes	176	Labradoodle (X Labrador/Poodle)		3	Large	F	2015-08-08	FALSE	FALSE
5649	3891	2016-04-29	47	206.857	1448	3	3.96712	young	3.61	5.82	5.7	2.85	FALSE	Yes	261	Shih Tzu		1	Small	M	2012-05-12	FALSE	FALSE
5639	4441	2016-04-28	153	665.429	4658	12	12.7616	old	3.04	4.28	5.55	1.82	TRUE	Yes	163	Jack/Parson Russell Terrier		1	Small	F	2003-07-28	FALSE	FALSE
5640	4442	2016-04-28	3	16.2857	114	0	0.312329	young	4.08	6	6	3.97	FALSE	Yes	176	Labradoodle (X Labrador/Poodle)		3	Large	M	2016-01-05	FALSE	FALSE
5620	4432	2016-04-27	33	147.429	1032	2	2.8274	young	3.36	5.13	3.69	3.38	FALSE	Yes	163	Jack/Parson Russell Terrier		1	Small	F	2013-06-30	FALSE	FALSE
5622	3722	2016-04-27	48	212.857	1490	4	4.08219	middle-aged	3.05	2.43	3.19	3.55	FALSE	Yes	96	Spaniel - English Cocker		2	Medium	M	2012-03-29	FALSE	FALSE
5624	4437	2016-04-27	121	526.857	3688	10	10.1041	old	2.08	3.99	3.94	2.13	TRUE	Yes	36	Basset Hound		3	Large	F	2006-03-23	FALSE	FALSE
5626	4438	2016-04-27	16	72	504	1	1.38082	young	3.81	5.83	5.81	3.26	FALSE	Yes	226	Poodle (Toy)		1	Small	M	2014-12-10	FALSE	FALSE
5630	3531	2016-04-27	9	41.1429	288	0	0.789041	young	4.15	6	6	4.26	FALSE	Yes	96	Spaniel - English Cocker		2	Medium	F	2015-07-14	FALSE	FALSE
5615	4430	2016-04-26	109	475.857	3331	9	9.12603	old	3.55	5.12	4.8	2.49	TRUE	Yes	309	Yorkshire Terrier		1	Small	M	2007-03-14	FALSE	FALSE
5616	4431	2016-04-26	53	233.143	1632	4	4.47123	middle-aged	3.23	6	5.81	2.97	FALSE	Yes	72	Bulldog - British		2	Medium	M	2011-11-07	FALSE	FALSE
5601	3203	2016-04-25	40	176.429	1235	3	3.38356	young	2.75	5.28	5.8	4.26	FALSE	Yes	95	Cockapoo / Cockerpoo / Spoodle (X Spaniel/Poodle)		2	Medium	M	2012-12-07	FALSE	FALSE
5602	4422	2016-04-25	10	46.4286	325	0	0.890411	young	3.95	6	6	4.26	FALSE	Yes	95	Cockapoo / Cockerpoo / Spoodle (X Spaniel/Poodle)		2	Medium	M	2015-06-05	FALSE	FALSE
5605	3865	2016-04-25	6	29	203	0	0.556164	young	4.15	6	6	4.26	FALSE	Yes	96	Spaniel - English Cocker		2	Medium	M	2015-10-05	FALSE	FALSE
5607	4425	2016-04-25	11	52	364	0	0.99726	young	3.91	6	6	4.26	FALSE	Yes	163	Jack/Parson Russell Terrier		1	Small	M	2015-04-27	FALSE	FALSE
5609	4426	2016-04-25	56	243.714	1706	4	4.67397	middle-aged	2.34	5.29	5.27	1.65	FALSE	Yes	144	Greyhound		3	Large	M	2011-08-24	FALSE	FALSE
5610	4427	2016-04-25	94	409	2863	7	7.84384	middle-aged	3.61	5.54	5.9	3.43	TRUE	Yes	274	Spaniel - English Springer		2	Medium	M	2008-06-23	FALSE	FALSE
5591	2864	2016-04-24	22	99.4286	696	1	1.90685	young	3.53	4.34	4.41	2.9	FALSE	Yes	177	Retriever - Labrador		3	Large	F	2014-05-29	FALSE	TRUE
5594	3616	2016-04-24	124	542.429	3797	10	10.4027	old	2.59	3.78	3.94	2.38	TRUE	Yes	177	Retriever - Labrador		3	Large	M	2005-12-01	FALSE	FALSE
5595	4418	2016-04-24	35	153.429	1074	2	2.94247	young	4.15	6	6	4.26	FALSE	Yes	59	Border Collie		2	Medium	F	2013-05-16	FALSE	TRUE
5596	4419	2016-04-24	28	123.857	867	2	2.37534	young	4.03	5.22	5.28	3.39	FALSE	Yes	5	Mixed (Medium)		2	Medium	M	2013-12-09	FALSE	FALSE
5597	4420	2016-04-24	46	203.714	1426	3	3.90685	young	3.57	5.81	5.7	4.26	FALSE	Yes	177	Retriever - Labrador		3	Large	M	2012-05-29	FALSE	FALSE
5581	3252	2016-04-23	13	59.1429	414	1	1.13425	young	2.96	4.7	5.47	1.65	FALSE	Yes	96	Spaniel - English Cocker		2	Medium	F	2015-03-06	FALSE	FALSE
5582	3253	2016-04-23	24	108.286	758	2	2.07671	young	3.7	5.39	5.47	2.15	FALSE	Yes	96	Spaniel - English Cocker		2	Medium	M	2014-03-27	FALSE	FALSE
5585	4415	2016-04-23	82	357.571	2503	6	6.85753	middle-aged	3.78	5.91	5.47	3.22	TRUE	Yes	95	Cockapoo / Cockerpoo / Spoodle (X Spaniel/Poodle)		2	Medium	M	2009-06-16	FALSE	TRUE
5574	3785	2016-04-22	7	34	238	0	0.652055	young	3.99	6	6	3.72	FALSE	Yes	101	Cross Breed (Unknown X )/ Mongrel		4	Extra Large	M	2015-08-28	FALSE	FALSE
5560	4405	2016-04-21	95	413.286	2893	7	7.92603	middle-aged	3.59	5.49	5.81	3.55	TRUE	Yes	96	Spaniel - English Cocker		2	Medium	F	2008-05-20	FALSE	FALSE
5561	3395	2016-04-21	38	165.857	1161	3	3.18082	young	2.6	4.26	4.32	3.74	FALSE	Yes	59	Border Collie		2	Medium	M	2013-02-15	FALSE	FALSE
5562	3801	2016-04-21	21	94.2857	660	1	1.80822	young	3.63	6	5.9	3.97	FALSE	Yes	96	Spaniel - English Cocker		2	Medium	M	2014-07-01	FALSE	FALSE
5565	4406	2016-04-21	33	144.286	1010	2	2.76712	young	4	5.71	6	2.52	FALSE	Yes	177	Retriever - Labrador		3	Large	M	2013-07-16	FALSE	FALSE
5569	4409	2016-04-21	82	360	2520	6	6.90411	middle-aged	4.15	6	6	4.26	TRUE	Yes	274	Spaniel - English Springer		2	Medium	M	2009-05-28	FALSE	FALSE
5540	3827	2016-04-19	6	26.1429	183	0	0.50137	young	3.67	5.9	5.75	3.72	FALSE	Yes	292	Tibetan Terrier		2	Medium	F	2015-10-19	FALSE	FALSE
5541	4395	2016-04-19	5	22.1429	155	0	0.424658	young	3.98	6	6	3.68	FALSE	Yes	10	Akita - American		3	Large	F	2015-11-16	FALSE	FALSE
5543	3277	2016-04-19	10	47.1429	330	0	0.90411	young	4.02	5.91	5.69	4.01	FALSE	Yes	96	Spaniel - English Cocker		2	Medium	F	2015-05-25	FALSE	FALSE
5544	4396	2016-04-19	5	22	154	0	0.421918	young	4.15	6	6	3.43	FALSE	Yes	10	Akita - American		3	Large	F	2015-11-17	FALSE	FALSE
5545	4397	2016-04-19	49	216.286	1514	4	4.14795	middle-aged	4	5.49	6	3.97	FALSE	Yes	163	Jack/Parson Russell Terrier		1	Small	F	2012-02-26	FALSE	TRUE
5532	3706	2016-04-18	89	389.429	2726	7	7.46849	middle-aged	3.45	5.19	6	3.19	TRUE	Yes	88	Chinese Crested		1	Small	F	2008-10-31	FALSE	TRUE
5534	3680	2016-04-18	6	26.4286	185	0	0.506849	young	3.85	6	5.91	2.43	FALSE	Yes	38	Beagle		2	Medium	F	2015-10-16	FALSE	FALSE
5535	4393	2016-04-18	31	138.143	967	2	2.64932	young	4.09	6	5.37	1.61	FALSE	Yes	6	Mixed (Large)		3	Large	F	2013-08-25	FALSE	FALSE
5523	3641	2016-04-17	6	29.1429	204	0	0.558904	young	4.15	6	6	4.26	FALSE	Yes	60	Border Terrier		1	Small	F	2015-09-26	FALSE	FALSE
5515	3678	2016-04-16	49	216.143	1513	4	4.14521	middle-aged	3.98	6	6	4.26	FALSE	Yes	177	Retriever - Labrador		3	Large	M	2012-02-24	FALSE	FALSE
5504	4382	2016-04-15	27	121.571	851	2	2.33151	young	3.96	5.01	6	4.01	FALSE	Yes	284	Bull Terrier - Staffordshire		2	Medium	M	2013-12-16	FALSE	FALSE
5508	3000	2016-04-15	10	43.5714	305	0	0.835616	young	3.44	5.71	6	2.81	FALSE	Yes	59	Border Collie		2	Medium	M	2015-06-15	FALSE	FALSE
5496	4379	2016-04-14	6	29.8571	209	0	0.572603	young	2.6	3.86	5.8	2.03	FALSE	Yes	265	Husky - Siberian		3	Large	M	2015-09-18	FALSE	FALSE
5499	4380	2016-04-14	74	321.571	2251	6	6.16712	middle-aged	4.07	5.39	6	4.26	FALSE	Yes	128	German Shepherd / Alsatian		3	Large	M	2010-02-14	FALSE	FALSE
5500	4381	2016-04-14	76	333.857	2337	6	6.40274	middle-aged	4.09	5.39	6	3.1	TRUE	Yes	183	Lhasa Apso		1	Small	M	2009-11-20	FALSE	FALSE
5501	3185	2016-04-14	12	54	378	1	1.03562	young	4.09	5.3	5.77	4.26	FALSE	Yes	60	Border Terrier		1	Small	M	2015-04-02	FALSE	FALSE
5482	4373	2016-04-13	80	351.857	2463	6	6.74795	middle-aged	3.79	6	5.85	3.39	TRUE	Yes	3	Other (Large)		3	Large	F	2009-07-16	FALSE	TRUE
5483	4374	2016-04-13	55	240.571	1684	4	4.6137	middle-aged	3.97	6	6	4.26	FALSE	Yes	3	Other (Large)		3	Large	F	2011-09-03	FALSE	TRUE
5484	4375	2016-04-13	73	319.286	2235	6	6.12329	middle-aged	4.15	5.39	6	4.26	FALSE	Yes	3	Other (Large)		3	Large	F	2010-03-01	FALSE	FALSE
5488	1095	2016-04-13	84	367	2569	7	7.03836	middle-aged	3.14	5.1	5.55	3.72	TRUE	Yes	101	Cross Breed (Unknown X )/ Mongrel		4	Extra Large	F	2009-04-01	FALSE	FALSE
5470	3761	2016-04-12	6	27.7143	194	0	0.531507	young	3.61	5.33	5.91	2.39	FALSE	Yes	5	Mixed (Medium)		2	Medium	M	2015-10-01	FALSE	FALSE
5474	4370	2016-04-12	44	193.286	1353	3	3.70685	young	2.39	5.47	5.61	4.26	FALSE	Yes	96	Spaniel - English Cocker		2	Medium	M	2012-07-29	FALSE	FALSE
5475	4371	2016-04-12	44	193.286	1353	3	3.70685	young	2.8	5.81	4.09	3.42	FALSE	Yes	96	Spaniel - English Cocker		2	Medium	M	2012-07-29	FALSE	FALSE
5477	3355	2016-04-12	43	190.571	1334	3	3.65479	young	2.67	4.92	5.12	3.55	FALSE	Yes	6	Mixed (Large)		3	Large	F	2012-08-17	FALSE	FALSE
5478	3357	2016-04-12	77	336.714	2357	6	6.45753	middle-aged	3.03	5.33	5.31	3.55	TRUE	Yes	6	Mixed (Large)		3	Large	F	2009-10-29	FALSE	FALSE
5455	1292	2016-04-11	115	501.143	3508	9	9.61096	old	3.5	5.91	5.55	2.9	TRUE	Yes	215	Patterdale Terrier		1	Small	F	2006-09-03	FALSE	FALSE
5459	4362	2016-04-11	32	140.571	984	2	2.69589	young	4.01	6	6	4.26	FALSE	Yes	274	Spaniel - English Springer		2	Medium	F	2013-08-01	FALSE	FALSE
5465	4365	2016-04-11	19	83.4286	584	1	1.6	young	2.48	5.59	5.72	2.26	FALSE	Yes	5	Mixed (Medium)		2	Medium	M	2014-09-05	FALSE	FALSE
5444	4357	2016-04-10	137	596.857	4178	11	11.4466	old	3.02	5.72	5.71	3.84	TRUE	Yes	101	Cross Breed (Unknown X )/ Mongrel		4	Extra Large	M	2004-11-01	FALSE	FALSE
5448	2720	2016-04-10	48	211.857	1483	4	4.06301	middle-aged	3.42	6	5.61	4.01	FALSE	Yes	274	Spaniel - English Springer		2	Medium	M	2012-03-19	FALSE	FALSE
5449	4358	2016-04-10	91	396.857	2778	7	7.61096	middle-aged	1.77	5.25	4.92	1.59	TRUE	Yes	309	Yorkshire Terrier		1	Small	F	2008-09-01	FALSE	FALSE
5450	3699	2016-04-10	36	157.143	1100	3	3.0137	young	4.09	6	5.9	4.26	FALSE	Yes	177	Retriever - Labrador		3	Large	M	2013-04-06	FALSE	FALSE
5451	4359	2016-04-10	17	77.1429	540	1	1.47945	young	3.73	5.91	6	3.68	FALSE	Yes	4	Mixed (Small)		1	Small	F	2014-10-18	FALSE	TRUE
5453	4360	2016-04-10	6	29.1429	204	0	0.558904	young	2.08	3.99	3.94	2.13	FALSE	Yes	122	Fox Terrier - Wire		2	Medium	F	2015-09-19	FALSE	FALSE
5454	3738	2016-04-10	34	150.857	1056	2	2.89315	young	4.15	6	5.36	4.26	FALSE	Yes	96	Spaniel - English Cocker		2	Medium	M	2013-05-20	FALSE	FALSE
5436	4352	2016-04-09	9	42.5714	298	0	0.816438	young	4.15	5.39	5.36	2.9	FALSE	Yes	249	Saluki		3	Large	M	2015-06-16	FALSE	FALSE
5438	4354	2016-04-09	39	170.429	1193	3	3.26849	young	4.03	6	5.02	4.26	FALSE	Yes	183	Lhasa Apso		1	Small	M	2013-01-02	FALSE	TRUE
5442	4356	2016-04-09	13	59.5714	417	1	1.14247	young	4.15	6	5.47	3.22	FALSE	Yes	177	Retriever - Labrador		3	Large	F	2015-02-17	FALSE	FALSE
5422	4347	2016-04-08	5	22.7143	159	0	0.435616	young	3.7	5.25	5.47	3.43	FALSE	Yes	59	Border Collie		2	Medium	F	2015-11-01	FALSE	FALSE
5425	4348	2016-04-08	115	502.714	3519	9	9.6411	old	4	6	5.56	4.09	TRUE	Yes	177	Retriever - Labrador		3	Large	M	2006-08-20	FALSE	FALSE
5412	4340	2016-04-07	34	151.429	1060	2	2.90411	young	4.15	6	6	4.26	FALSE	Yes	274	Spaniel - English Springer		2	Medium	F	2013-05-13	FALSE	FALSE
5413	4341	2016-04-07	79	346	2422	6	6.63562	middle-aged	3.5	5.9	5.6	3.38	TRUE	Yes	144	Greyhound		3	Large	M	2009-08-20	FALSE	TRUE
5420	4345	2016-04-07	44	191.571	1341	3	3.67397	young	2.97	5.37	5.21	3.01	FALSE	Yes	309	Yorkshire Terrier		1	Small	F	2012-08-05	FALSE	FALSE
5401	4333	2016-04-06	4	18.2857	128	0	0.350685	young	3.92	6	5.91	0.87	FALSE	Yes	223	Pomeranian		1	Small	M	2015-11-30	FALSE	FALSE
5402	1395	2016-04-06	22	95.7143	670	1	1.83562	young	3.81	5.73	6	4.26	FALSE	Yes	137	Goldendoodle (X Golden Retriever/Poodle)		3	Large	M	2014-06-06	FALSE	FALSE
5403	3681	2016-04-06	139	605	4235	11	11.6027	old	4.06	5.39	5.53	4.09	TRUE	Yes	163	Jack/Parson Russell Terrier		1	Small	F	2004-09-01	FALSE	FALSE
5404	4334	2016-04-06	45	196.286	1374	3	3.76438	young	2.3	4.58	6	3.43	FALSE	Yes	144	Greyhound		3	Large	M	2012-07-02	FALSE	TRUE
5407	4338	2016-04-06	22	96.5714	676	1	1.85205	young	3.07	5.52	5.2	3.84	FALSE	Yes	309	Yorkshire Terrier		1	Small	M	2014-05-31	FALSE	FALSE
5381	3193	2016-04-04	8	38.1429	267	0	0.731507	young	3.74	5.82	5.9	3.97	FALSE	Yes	177	Retriever - Labrador		3	Large	M	2015-07-12	FALSE	FALSE
5387	4327	2016-04-04	37	161.571	1131	3	3.09863	young	3.27	5.81	5.9	4.26	FALSE	Yes	177	Retriever - Labrador		3	Large	F	2013-02-28	FALSE	TRUE
5373	4322	2016-04-03	5	25.8571	181	0	0.49589	young	3.76	6	6	2.65	FALSE	Yes	1	Other (Small)		1	Small	F	2015-10-05	FALSE	FALSE
5375	4323	2016-04-03	3	16	112	0	0.306849	young	3.41	5.53	5.69	3.68	FALSE	Yes	95	Cockapoo / Cockerpoo / Spoodle (X Spaniel/Poodle)		2	Medium	M	2015-12-13	FALSE	FALSE
5358	4313	2016-04-02	30	134.429	941	2	2.57808	young	4.15	5.48	6	4.26	FALSE	Yes	59	Border Collie		2	Medium	M	2013-09-04	FALSE	FALSE
5361	3243	2016-04-02	50	219.571	1537	4	4.21096	middle-aged	3.57	6	5.9	1.04	FALSE	Yes	231	Pug		1	Small	M	2012-01-17	FALSE	FALSE
5362	3675	2016-04-02	26	114	798	2	2.1863	young	3.49	4.97	5.54	0.64	FALSE	Yes	101	Cross Breed (Unknown X )/ Mongrel		4	Extra Large	F	2014-01-25	FALSE	FALSE
5363	4318	2016-04-02	104	456.429	3195	8	8.75342	old	4.07	6	6	4.26	TRUE	Yes	177	Retriever - Labrador		3	Large	F	2007-07-04	FALSE	FALSE
5365	4320	2016-04-02	23	103.571	725	1	1.9863	young	3.9	6	6	1.58	FALSE	Yes	19	Bull Terrier - American Staffordshire		2	Medium	M	2014-04-08	FALSE	FALSE
5370	4321	2016-04-02	52	230.286	1612	4	4.41644	middle-aged	4.15	5.37	6	4.26	FALSE	Yes	99	Collie - Smooth Coat		2	Medium	M	2011-11-03	FALSE	FALSE
5349	4308	2016-04-01	97	425.571	2979	8	8.16164	old	3.9	5.11	5.9	4.26	TRUE	Yes	104	Dalmation		3	Large	M	2008-02-04	FALSE	FALSE
5351	2785	2016-04-01	11	51.4286	360	0	0.986301	young	4.15	6	6	4.26	FALSE	Yes	245	Rhodesian Ridgeback		3	Large	F	2015-04-07	FALSE	FALSE
5353	4310	2016-04-01	76	330.429	2313	6	6.33699	middle-aged	4	5.9	5.47	1.57	TRUE	Yes	101	Cross Breed (Unknown X )/ Mongrel		4	Extra Large	M	2009-12-01	FALSE	FALSE
5357	4312	2016-04-01	17	74.8571	524	1	1.43562	young	4.15	6	6	3.97	FALSE	Yes	199	Schnauzer (Miniature)		1	Small	F	2014-10-25	FALSE	FALSE
5338	4298	2016-03-31	27	117.714	824	2	2.25753	young	3.41	1.98	3	4.26	FALSE	Yes	284	Bull Terrier - Staffordshire		2	Medium	F	2013-12-28	FALSE	FALSE
5346	4305	2016-03-31	107	468.429	3279	8	8.98356	old	4.08	6	6	3.97	TRUE	Yes	163	Jack/Parson Russell Terrier		1	Small	F	2007-04-09	FALSE	FALSE
5348	4307	2016-03-31	79	346.286	2424	6	6.6411	middle-aged	4.15	6	6	4.26	TRUE	Yes	284	Bull Terrier - Staffordshire		2	Medium	F	2009-08-11	FALSE	FALSE
5317	4281	2016-03-29	4	18.8571	132	0	0.361644	young	4.08	6	6	3.1	FALSE	Yes	96	Spaniel - English Cocker		2	Medium	M	2015-11-18	FALSE	FALSE
5318	4282	2016-03-29	103	452.143	3165	8	8.67123	old	3.03	4.92	4.96	2.57	TRUE	Yes	163	Jack/Parson Russell Terrier		1	Small	M	2007-07-30	FALSE	FALSE
5320	4283	2016-03-29	9	40.7143	285	0	0.780822	young	4.07	6	6	4.26	FALSE	Yes	309	Yorkshire Terrier		1	Small	F	2015-06-18	FALSE	TRUE
5322	4286	2016-03-29	74	325	2275	6	6.23288	middle-aged	3.21	5.34	5.81	2.48	FALSE	Yes	272	Soft Coated Wheaten Terrier		2	Medium	F	2010-01-05	FALSE	FALSE
5323	3650	2016-03-29	75	326.571	2286	6	6.26301	middle-aged	2.83	5.91	5.59	4.09	TRUE	Yes	272	Soft Coated Wheaten Terrier		2	Medium	M	2009-12-25	FALSE	FALSE
5309	4278	2016-03-28	17	74	518	1	1.41918	young	3.76	5.84	6	3.72	FALSE	Yes	60	Border Terrier		1	Small	M	2014-10-27	FALSE	FALSE
5312	1807	2016-03-28	75	327.143	2290	6	6.27397	middle-aged	3.55	5.72	5.81	3.3	TRUE	Yes	3	Other (Large)		3	Large	F	2009-12-20	FALSE	FALSE
5315	2805	2016-03-28	51	222	1554	4	4.25753	middle-aged	4.15	4.85	4.48	4.26	FALSE	Yes	177	Retriever - Labrador		3	Large	M	2011-12-26	FALSE	FALSE
5301	4274	2016-03-27	52	229.714	1608	4	4.40548	middle-aged	3.42	5.64	5.74	3.74	FALSE	Yes	5	Mixed (Medium)		2	Medium	M	2011-11-01	FALSE	TRUE
5303	3600	2016-03-27	6	26.2857	184	0	0.50411	young	3.93	6	6	3.68	FALSE	Yes	230	Portuguese Water Dog		3	Large	M	2015-09-25	FALSE	FALSE
5304	4275	2016-03-27	36	157.571	1103	3	3.02192	young	3.36	4.15	4.35	4.09	FALSE	Yes	261	Shih Tzu		1	Small	M	2013-03-20	FALSE	FALSE
5306	4276	2016-03-27	36	157.571	1103	3	3.02192	young	2.93	3.61	4.66	3.57	FALSE	Yes	261	Shih Tzu		1	Small	M	2013-03-20	FALSE	FALSE
5307	4277	2016-03-27	4	17.4286	122	0	0.334247	young	3.63	5.74	5.9	3.97	FALSE	Yes	274	Spaniel - English Springer		2	Medium	M	2015-11-26	FALSE	FALSE
5284	2926	2016-03-26	30	133.714	936	2	2.56438	young	3.52	5.64	6	3.68	FALSE	Yes	177	Retriever - Labrador		3	Large	M	2013-09-02	FALSE	FALSE
5289	3634	2016-03-26	6	27.8571	195	0	0.534247	young	3.61	4.97	5.43	3.55	FALSE	Yes	176	Labradoodle (X Labrador/Poodle)		3	Large	M	2015-09-13	FALSE	FALSE
5292	4269	2016-03-26	9	39.8571	279	0	0.764384	young	4.08	5.48	6	3.72	FALSE	Yes	95	Cockapoo / Cockerpoo / Spoodle (X Spaniel/Poodle)		2	Medium	F	2015-06-21	FALSE	FALSE
5293	4270	2016-03-26	99	431.571	3021	8	8.27671	old	3.93	6	5.9	4.26	TRUE	Yes	177	Retriever - Labrador		3	Large	F	2007-12-18	FALSE	FALSE
5273	3529	2016-03-25	166	725	5075	13	13.9041	old	3.37	5.8	4.88	2.86	TRUE	Yes	5	Mixed (Medium)		2	Medium	F	2002-05-03	FALSE	FALSE
5274	4261	2016-03-25	168	730.571	5114	14	14.011	old	3.85	5.91	5.81	3.55	TRUE	Yes	5	Mixed (Medium)		2	Medium	M	2002-03-25	FALSE	FALSE
5275	3623	2016-03-25	9	42.4286	297	0	0.813699	young	4.09	6	4.83	3.22	FALSE	Yes	274	Spaniel - English Springer		2	Medium	F	2015-06-02	FALSE	FALSE
5276	4263	2016-03-25	63	275.143	1926	5	5.27671	middle-aged	4.15	6	5.23	3.55	FALSE	Yes	5	Mixed (Medium)		2	Medium	F	2010-12-16	FALSE	TRUE
5278	3640	2016-03-25	5	23.5714	165	0	0.452055	young	3.76	5.29	5.54	4.09	FALSE	Yes	108	French Mastiff / Dogue de Bordeaux		3	Large	M	2015-10-12	FALSE	FALSE
5263	4255	2016-03-24	6	26.4286	185	0	0.506849	young	3.97	5.34	5.16	2.56	FALSE	Yes	262	Shih Tzu Poodle/Pooshih/Shih Poo (X Shih Tzu/Poodle)		1	Small	F	2015-09-21	FALSE	FALSE
5265	4257	2016-03-24	36	157.286	1101	3	3.01644	young	3.83	6	5.9	4.26	FALSE	Yes	261	Shih Tzu		1	Small	M	2013-03-19	FALSE	FALSE
5267	4258	2016-03-24	22	95.7143	670	1	1.83562	young	3.81	5.61	4.5	3.14	FALSE	Yes	96	Spaniel - English Cocker		2	Medium	F	2014-05-24	FALSE	TRUE
5257	4248	2016-03-23	51	221.714	1552	4	4.25205	middle-aged	3.52	5.81	3.89	3.28	FALSE	Yes	13	Malamute - Alaskan		4	Extra Large	M	2011-12-23	FALSE	FALSE
5241	4242	2016-03-22	9	42	294	0	0.805479	young	3.97	5.2	5.8	4.26	FALSE	Yes	274	Spaniel - English Springer		2	Medium	F	2015-06-02	FALSE	FALSE
5251	4245	2016-03-22	62	270	1890	5	5.17808	middle-aged	3.77	4.92	4.16	4.09	FALSE	Yes	177	Retriever - Labrador		3	Large	M	2011-01-18	FALSE	FALSE
5236	4238	2016-03-21	10	45.1429	316	0	0.865753	young	4.09	5.79	5.24	2.45	FALSE	Yes	189	Maltese		1	Small	M	2015-05-10	FALSE	TRUE
5237	2603	2016-03-21	146	638.714	4471	12	12.2493	old	3.91	6	5.24	4.26	TRUE	Yes	52	Bichon Frise		1	Small	M	2003-12-24	FALSE	FALSE
5238	4239	2016-03-21	15	66.2857	464	1	1.27123	young	3.98	6	6	4.01	FALSE	Yes	186	Lurcher		3	Large	M	2014-12-13	FALSE	FALSE
5227	4234	2016-03-20	42	183	1281	3	3.50959	young	3.24	5.45	4.64	2.93	FALSE	Yes	104	Dalmation		3	Large	F	2012-09-16	FALSE	FALSE
5229	3202	2016-03-20	134	585.143	4096	11	11.2219	old	2.67	4.89	4.18	2.17	TRUE	Yes	5	Mixed (Medium)		2	Medium	F	2005-01-01	FALSE	FALSE
5231	4235	2016-03-20	73	318.143	2227	6	6.10137	middle-aged	3.86	5.39	5.9	4.26	FALSE	Yes	177	Retriever - Labrador		3	Large	F	2010-02-13	FALSE	FALSE
5232	4236	2016-03-20	86	375.571	2629	7	7.20274	middle-aged	3.08	4.81	4.63	2.97	TRUE	Yes	309	Yorkshire Terrier		1	Small	M	2009-01-07	FALSE	FALSE
5233	4237	2016-03-20	15	68.1429	477	1	1.30685	young	4.15	6	6	4.26	FALSE	Yes	96	Spaniel - English Cocker		2	Medium	F	2014-11-29	FALSE	FALSE
5216	2138	2016-03-19	41	180.571	1264	3	3.46301	young	3.95	5.4	5.91	4.09	FALSE	Yes	59	Border Collie		2	Medium	F	2012-10-02	FALSE	FALSE
5219	3610	2016-03-19	103	450.571	3154	8	8.6411	old	4.15	5.37	6	4.26	TRUE	Yes	137	Goldendoodle (X Golden Retriever/Poodle)		3	Large	M	2007-07-31	FALSE	TRUE
5220	4229	2016-03-19	28	121.714	852	2	2.33425	young	3.16	5.12	5.57	2.65	FALSE	Yes	199	Schnauzer (Miniature)		1	Small	M	2013-11-18	FALSE	TRUE
5221	4230	2016-03-19	27	120.571	844	2	2.31233	young	4.15	5.39	6	4.26	FALSE	Yes	199	Schnauzer (Miniature)		1	Small	M	2013-11-26	FALSE	TRUE
5224	4232	2016-03-19	89	387.143	2710	7	7.42466	middle-aged	4.15	5.9	6	3.68	TRUE	Yes	177	Retriever - Labrador		3	Large	F	2008-10-17	FALSE	TRUE
5206	4224	2016-03-18	6	27.1429	190	0	0.520548	young	4.15	6	6	2.52	FALSE	Yes	274	Spaniel - English Springer		2	Medium	F	2015-09-10	FALSE	FALSE
5207	2066	2016-03-18	54	236.286	1654	4	4.53151	middle-aged	4.15	6	6	4.26	FALSE	Yes	274	Spaniel - English Springer		2	Medium	F	2011-09-07	FALSE	FALSE
5210	4226	2016-03-18	108	469.714	3288	9	9.00822	old	2.08	3.99	3.94	2.13	TRUE	Yes	7	Affenpinscher		1	Small	M	2007-03-18	FALSE	FALSE
5211	3102	2016-03-18	48	210.857	1476	4	4.04384	middle-aged	3.92	5.91	5.9	4.26	FALSE	Yes	4	Mixed (Small)		1	Small	M	2012-03-03	FALSE	FALSE
5212	4227	2016-03-18	35	154.286	1080	2	2.9589	young	3.33	5.53	5.71	3.84	FALSE	Yes	95	Cockapoo / Cockerpoo / Spoodle (X Spaniel/Poodle)		2	Medium	M	2013-04-03	FALSE	FALSE
5174	4205	2016-03-16	83	363.571	2545	6	6.9726	middle-aged	2.9	4.66	3.58	2.1	TRUE	Yes	4	Mixed (Small)		1	Small	M	2009-03-28	FALSE	FALSE
5180	2798	2016-03-16	36	156.714	1097	3	3.00548	young	3.51	5.34	5.7	2.9	FALSE	Yes	95	Cockapoo / Cockerpoo / Spoodle (X Spaniel/Poodle)		2	Medium	F	2013-03-15	FALSE	TRUE
5186	4214	2016-03-16	42	185	1295	3	3.54795	young	4.15	6	6	2.9	FALSE	Yes	274	Spaniel - English Springer		2	Medium	M	2012-08-29	FALSE	FALSE
5187	4215	2016-03-16	56	245.714	1720	4	4.71233	middle-aged	3.84	6	6	3.72	FALSE	Yes	101	Cross Breed (Unknown X )/ Mongrel		4	Extra Large	M	2011-07-01	FALSE	FALSE
5188	4217	2016-03-16	117	510.571	3574	9	9.79178	old	3.96	6	6	4.26	TRUE	Yes	96	Spaniel - English Cocker		2	Medium	M	2006-06-03	FALSE	FALSE
5189	4218	2016-03-16	11	50.7143	355	0	0.972603	young	4.15	6	6	4.26	FALSE	Yes	5	Mixed (Medium)		2	Medium	M	2015-03-27	FALSE	FALSE
5191	4219	2016-03-16	73	318.571	2230	6	6.10959	middle-aged	3.33	6	5.68	2.4	FALSE	Yes	60	Border Terrier		1	Small	F	2010-02-06	FALSE	FALSE
5161	4197	2016-03-15	89	389.286	2725	7	7.46575	middle-aged	2.77	4.95	5.47	3.22	TRUE	Yes	221	Pointer - English		3	Large	F	2008-09-28	FALSE	TRUE
5163	4198	2016-03-15	14	61.2857	429	1	1.17534	young	3.93	5.91	5.64	3.72	FALSE	Yes	261	Shih Tzu		1	Small	M	2015-01-11	FALSE	FALSE
5143	4185	2016-03-14	67	291.857	2043	5	5.59726	middle-aged	3.23	3.51	3.72	4.26	FALSE	Yes	101	Cross Breed (Unknown X )/ Mongrel		4	Extra Large	M	2010-08-10	FALSE	FALSE
5145	3521	2016-03-14	18	82	574	1	1.5726	young	3.71	5.91	5.36	2.65	FALSE	Yes	177	Retriever - Labrador		3	Large	F	2014-08-18	FALSE	FALSE
5146	4186	2016-03-14	76	334.143	2339	6	6.40822	middle-aged	3.6	4.93	3.79	2.78	TRUE	Yes	101	Cross Breed (Unknown X )/ Mongrel		4	Extra Large	F	2009-10-18	FALSE	FALSE
5152	4190	2016-03-14	9	39.2857	275	0	0.753425	young	4.15	5.44	5.36	4.26	FALSE	Yes	152	Hungarian Vizsla		3	Large	F	2015-06-13	FALSE	FALSE
5154	4191	2016-03-14	10	46.7143	327	0	0.89589	young	3.95	5.39	5.56	3.15	FALSE	Yes	4	Mixed (Small)		1	Small	F	2015-04-22	FALSE	FALSE
5159	4196	2016-03-14	20	88.1429	617	1	1.69041	young	3.79	6	5.41	4.26	FALSE	Yes	36	Basset Hound		3	Large	M	2014-07-06	FALSE	FALSE
5136	4181	2016-03-13	4	18.4286	129	0	0.353425	young	4.15	5.44	6	2.52	FALSE	Yes	4	Mixed (Small)		1	Small	F	2015-11-05	FALSE	FALSE
5142	4184	2016-03-13	9	39.8571	279	0	0.764384	young	3.91	5.39	6	4.26	FALSE	Yes	177	Retriever - Labrador		3	Large	M	2015-06-08	FALSE	FALSE
5127	4174	2016-03-12	24	106	742	2	2.03288	young	2.45	5.39	5.44	2.13	FALSE	Yes	183	Lhasa Apso		1	Small	F	2014-03-01	FALSE	TRUE
5131	4178	2016-03-12	145	632.714	4429	12	12.1342	old	2.09	4.77	3.94	3.49	TRUE	Yes	304	Whippet		2	Medium	M	2004-01-26	FALSE	FALSE
5134	4180	2016-03-12	12	52.4286	367	1	1.00548	young	4.09	6	5.9	3.72	FALSE	Yes	231	Pug		1	Small	M	2015-03-11	FALSE	FALSE
5116	4165	2016-03-11	122	530.286	3712	10	10.1699	old	4.15	6	6	4.26	TRUE	Yes	163	Jack/Parson Russell Terrier		1	Small	F	2006-01-11	FALSE	TRUE
5117	4166	2016-03-11	128	557.143	3900	10	10.6849	old	4.15	6	6	4.26	TRUE	Yes	177	Retriever - Labrador		3	Large	F	2005-07-07	FALSE	TRUE
5119	4168	2016-03-11	17	76.4286	535	1	1.46575	young	3.7	5.02	5.85	2.9	FALSE	Yes	284	Bull Terrier - Staffordshire		2	Medium	M	2014-09-23	FALSE	FALSE
5123	4171	2016-03-11	20	87	609	1	1.66849	young	3.77	6	5.36	2.97	FALSE	Yes	73	Bullmastiff		3	Large	M	2014-07-11	FALSE	FALSE
5124	4172	2016-03-11	6	26.1429	183	0	0.50137	young	4.09	6	6	4.26	FALSE	Yes	124	Bulldog - French		1	Small	M	2015-09-10	FALSE	FALSE
5108	4161	2016-03-10	22	99.2857	695	1	1.90411	young	4.15	6	6	3.39	FALSE	Yes	303	West Highland White Terrier		1	Small	F	2014-04-15	FALSE	FALSE
5113	2081	2016-03-10	97	425.857	2981	8	8.16712	old	3.92	6	5.9	3.43	TRUE	Yes	101	Cross Breed (Unknown X )/ Mongrel		4	Extra Large	M	2008-01-11	FALSE	FALSE
5088	1579	2016-03-09	33	147	1029	2	2.81918	young	2.92	5.47	4.85	2.39	FALSE	Yes	4	Mixed (Small)		1	Small	F	2013-05-15	FALSE	FALSE
5099	4155	2016-03-09	25	112	784	2	2.14795	young	3.79	5.92	5.58	2.85	FALSE	Yes	13	Malamute - Alaskan		4	Extra Large	F	2014-01-15	FALSE	TRUE
5102	4159	2016-03-09	40	176.143	1233	3	3.37808	young	3.79	5.73	5.9	3.97	FALSE	Yes	95	Cockapoo / Cockerpoo / Spoodle (X Spaniel/Poodle)		2	Medium	F	2012-10-23	FALSE	FALSE
5075	3171	2016-03-08	7	32.4286	227	0	0.621918	young	4.15	6	6	4.26	FALSE	Yes	82	King Charles Spaniel - Cavalier		1	Small	M	2015-07-25	FALSE	FALSE
5079	4144	2016-03-08	21	94.7143	663	1	1.81644	young	3.96	6	5.79	4.26	FALSE	Yes	5	Mixed (Medium)		2	Medium	F	2014-05-15	FALSE	FALSE
5080	4145	2016-03-08	149	651.143	4558	12	12.4877	old	3.6	6	5	3.91	TRUE	Yes	128	German Shepherd / Alsatian		3	Large	M	2003-09-15	FALSE	TRUE
5084	1860	2016-03-08	26	115	805	2	2.20548	young	2.08	3.99	3.94	2.13	FALSE	Yes	231	Pug		1	Small	M	2013-12-24	FALSE	FALSE
5085	4148	2016-03-08	13	56.2857	394	1	1.07945	young	3.89	5.8	5.59	2.97	FALSE	Yes	95	Cockapoo / Cockerpoo / Spoodle (X Spaniel/Poodle)		2	Medium	F	2015-02-08	FALSE	TRUE
5086	4149	2016-03-08	167	729.143	5104	13	13.9836	old	3.21	5.23	5.8	4.26	TRUE	Yes	265	Husky - Siberian		3	Large	F	2002-03-18	FALSE	FALSE
5062	4134	2016-03-06	117	510.857	3576	9	9.79726	old	3.3	5.63	5.88	4.26	TRUE	Yes	183	Lhasa Apso		1	Small	M	2006-05-22	FALSE	FALSE
5048	4126	2016-03-05	74	322.143	2255	6	6.17808	middle-aged	3.6	3.85	5.36	4.26	FALSE	Yes	90	Chinese Shar Pei		3	Large	F	2010-01-01	FALSE	TRUE
5052	4127	2016-03-05	62	271	1897	5	5.19726	middle-aged	3.27	5.63	5.48	3.97	FALSE	Yes	6	Mixed (Large)		3	Large	F	2010-12-25	FALSE	FALSE
5035	4117	2016-03-04	14	61.1429	428	1	1.1726	young	4.15	6	6	3.97	FALSE	Yes	4	Mixed (Small)		1	Small	F	2015-01-01	FALSE	FALSE
5037	4119	2016-03-04	16	73.2857	513	1	1.40548	young	3	5.82	6	3.43	FALSE	Yes	274	Spaniel - English Springer		2	Medium	F	2014-10-08	FALSE	FALSE
5041	3518	2016-03-04	5	24.7143	173	0	0.473973	young	3.47	5.72	5.78	3.14	FALSE	Yes	67	Briard		3	Large	M	2015-09-13	FALSE	FALSE
5043	4122	2016-03-04	130	565.857	3961	10	10.8521	old	2.32	4.77	5.52	4.26	TRUE	Yes	55	Bloodhound		3	Large	F	2005-04-30	FALSE	FALSE
5044	4123	2016-03-04	13	58.8571	412	1	1.12877	young	4.15	6	6	4.26	FALSE	Yes	211	Old English Sheepdog		3	Large	M	2015-01-17	FALSE	FALSE
5045	2144	2016-03-04	55	241	1687	4	4.62192	middle-aged	4.03	5.72	6	2.85	FALSE	Yes	82	King Charles Spaniel - Cavalier		1	Small	M	2011-07-22	FALSE	FALSE
5046	4124	2016-03-04	23	102.714	719	1	1.96986	young	2.95	5.77	4.83	1.45	FALSE	Yes	5	Mixed (Medium)		2	Medium	M	2014-03-16	FALSE	FALSE
5047	4125	2016-03-04	17	75.4286	528	1	1.44658	young	3.03	6	6	4.01	FALSE	Yes	177	Retriever - Labrador		3	Large	F	2014-09-23	FALSE	FALSE
5022	2782	2016-03-03	121	525.857	3681	10	10.0849	old	3.69	5.9	4.9	4.01	TRUE	Yes	163	Jack/Parson Russell Terrier		1	Small	F	2006-02-03	FALSE	FALSE
5028	4111	2016-03-03	85	369.286	2585	7	7.08219	middle-aged	4.07	6	6	4.26	TRUE	Yes	177	Retriever - Labrador		3	Large	F	2009-02-03	FALSE	FALSE
5031	4113	2016-03-03	33	146.714	1027	2	2.8137	young	3.69	5.64	5.8	4.26	FALSE	Yes	177	Retriever - Labrador		3	Large	M	2013-05-11	FALSE	FALSE
5032	4114	2016-03-03	45	196.857	1378	3	3.77534	young	3.94	5.82	6	2.61	FALSE	Yes	101	Cross Breed (Unknown X )/ Mongrel		4	Extra Large	F	2012-05-25	FALSE	TRUE
5008	4101	2016-03-02	78	339.286	2375	6	6.50685	middle-aged	4.15	6	5.63	3.72	TRUE	Yes	59	Border Collie		2	Medium	F	2009-08-31	FALSE	FALSE
5010	3500	2016-03-02	5	22.1429	155	0	0.424658	young	4.15	6	6	4.26	FALSE	Yes	177	Retriever - Labrador		3	Large	F	2015-09-29	FALSE	FALSE
5012	4103	2016-03-02	138	600	4200	11	11.5068	old	4.08	6	4.66	4.09	TRUE	Yes	6	Mixed (Large)		3	Large	F	2004-09-01	FALSE	FALSE
5013	4104	2016-03-02	17	74.4286	521	1	1.4274	young	3.85	5.8	5.9	3.97	FALSE	Yes	183	Lhasa Apso		1	Small	F	2014-09-28	FALSE	FALSE
4988	4084	2016-03-01	113	494.571	3462	9	9.48493	old	3.75	5.9	5.81	3.55	TRUE	Yes	274	Spaniel - English Springer		2	Medium	F	2006-09-08	FALSE	TRUE
4989	4085	2016-03-01	5	22.2857	156	0	0.427397	young	4.15	5.39	6	4.26	FALSE	Yes	64	Boxer		3	Large	M	2015-09-27	FALSE	TRUE
4990	4086	2016-03-01	106	463.429	3244	8	8.88767	old	2.48	5.39	5.08	3.22	TRUE	Yes	177	Retriever - Labrador		3	Large	F	2007-04-14	FALSE	FALSE
4993	2995	2016-03-01	77	335	2345	6	6.42466	middle-aged	2.67	5.45	4.42	3.74	TRUE	Yes	211	Old English Sheepdog		3	Large	M	2009-09-29	FALSE	FALSE
4997	4091	2016-03-01	78	340	2380	6	6.52055	middle-aged	3.38	5.79	5.8	4.01	TRUE	Yes	261	Shih Tzu		1	Small	F	2009-08-25	FALSE	FALSE
4998	4092	2016-03-01	64	279.857	1959	5	5.36712	middle-aged	4.15	6	6	3.72	FALSE	Yes	6	Mixed (Large)		3	Large	M	2010-10-20	FALSE	FALSE
4999	4093	2016-03-01	82	358.571	2510	6	6.87671	middle-aged	4.15	5.91	5.91	3.8	TRUE	Yes	163	Jack/Parson Russell Terrier		1	Small	M	2009-04-17	FALSE	FALSE
5003	4096	2016-03-01	11	50.2857	352	0	0.964384	young	3.79	4.77	5.41	4.26	FALSE	Yes	274	Spaniel - English Springer		2	Medium	M	2015-03-15	FALSE	FALSE
5004	4097	2016-03-01	83	364.143	2549	6	6.98356	middle-aged	3.59	6	5.9	2.56	TRUE	Yes	163	Jack/Parson Russell Terrier		1	Small	M	2009-03-09	FALSE	FALSE
5005	4098	2016-03-01	23	103.857	727	1	1.99178	young	4.15	6	6	2.52	FALSE	Yes	64	Boxer		3	Large	F	2014-03-05	FALSE	FALSE
4974	4070	2016-02-29	124	540	3780	10	10.3562	old	3.66	5.91	5.81	4.09	TRUE	Yes	129	German Pointer- Shorthaired		3	Large	M	2005-10-24	FALSE	TRUE
4975	4071	2016-02-29	39	172	1204	3	3.29863	young	3.73	5.69	6	3.19	FALSE	Yes	177	Retriever - Labrador		3	Large	M	2012-11-12	FALSE	FALSE
4978	2178	2016-02-29	26	115.143	806	2	2.20822	young	3.71	5.9	5.9	3.39	FALSE	Yes	87	Chihuahua - Smooth Coat		1	Small	M	2013-12-15	FALSE	FALSE
4980	4076	2016-02-29	14	64	448	1	1.2274	young	4.15	5.39	5.36	4.26	FALSE	Yes	10	Akita - American		3	Large	F	2014-12-08	FALSE	FALSE
4984	4080	2016-02-29	73	321.429	2250	6	6.16438	middle-aged	3.44	5.39	6	2.78	FALSE	Yes	90	Chinese Shar Pei		3	Large	F	2010-01-01	FALSE	FALSE
4985	4081	2016-02-29	82	358.429	2509	6	6.87397	middle-aged	3.85	5.7	5.89	3.14	TRUE	Yes	163	Jack/Parson Russell Terrier		1	Small	M	2009-04-17	FALSE	FALSE
4964	4065	2016-02-28	41	180.857	1266	3	3.46849	young	3.77	5.3	5.9	4.26	FALSE	Yes	256	Sealyham Terrier		2	Medium	M	2012-09-10	FALSE	FALSE
4966	3009	2016-02-28	9	42.5714	298	0	0.816438	young	3.55	5.74	5.8	2.36	FALSE	Yes	124	Bulldog - French		1	Small	M	2015-05-06	FALSE	FALSE
4970	4067	2016-02-28	20	88.7143	621	1	1.70137	young	3.95	4.92	5.36	3.52	FALSE	Yes	96	Spaniel - English Cocker		2	Medium	F	2014-06-17	FALSE	FALSE
4962	3366	2016-02-27	53	231.857	1623	4	4.44658	middle-aged	3.9	6	6	2.52	FALSE	Yes	5	Mixed (Medium)		2	Medium	F	2011-09-18	FALSE	FALSE
4955	4064	2016-02-26	61	266	1862	5	5.10137	middle-aged	1.93	5.24	5.61	4.01	FALSE	Yes	82	King Charles Spaniel - Cavalier		1	Small	M	2011-01-21	FALSE	TRUE
4959	2359	2016-02-26	45	196.714	1377	3	3.7726	young	3.77	4.83	3	4.26	FALSE	Yes	199	Schnauzer (Miniature)		1	Small	M	2012-05-20	FALSE	FALSE
4960	3341	2016-02-26	59	260.286	1822	4	4.99178	middle-aged	4.15	5.39	5.45	3.43	FALSE	Yes	5	Mixed (Medium)		2	Medium	F	2011-03-02	FALSE	TRUE
4950	4062	2016-02-25	35	155.714	1090	2	2.9863	young	3.76	5.91	5.08	3.72	FALSE	Yes	298	Weimaraner		3	Large	M	2013-03-02	FALSE	FALSE
4951	4063	2016-02-25	15	68.8571	482	1	1.32055	young	4.01	6	6	3.19	FALSE	Yes	265	Husky - Siberian		3	Large	F	2014-10-31	FALSE	FALSE
4938	4051	2016-02-24	110	480.571	3364	9	9.21644	old	3.55	5.21	4.87	4.26	TRUE	Yes	309	Yorkshire Terrier		1	Small	M	2006-12-09	FALSE	FALSE
4940	4053	2016-02-24	23	103.714	726	1	1.98904	young	4.15	6	6	4.26	FALSE	Yes	309	Yorkshire Terrier		1	Small	F	2014-02-28	FALSE	FALSE
4941	4054	2016-02-24	78	341.286	2389	6	6.54521	middle-aged	4.15	5.38	5.21	3.97	TRUE	Yes	95	Cockapoo / Cockerpoo / Spoodle (X Spaniel/Poodle)		2	Medium	M	2009-08-10	FALSE	FALSE
4942	4055	2016-02-24	204	887	6209	17	17.011	old	3.99	5.48	6	2.52	TRUE	Yes	177	Retriever - Labrador		3	Large	M	1999-02-24	FALSE	FALSE
4945	4058	2016-02-24	4	17.5714	123	0	0.336986	young	4.15	6	6	4.26	FALSE	Yes	101	Cross Breed (Unknown X )/ Mongrel		4	Extra Large	F	2015-10-24	FALSE	FALSE
4946	3050	2016-02-24	22	98.2857	688	1	1.88493	young	4.01	5.39	5.47	2.68	FALSE	Yes	2	Other (Medium)		2	Medium	F	2014-04-07	FALSE	FALSE
4934	3439	2016-02-23	13	60.5714	424	1	1.16164	young	3.73	5.91	5.81	3.55	FALSE	Yes	101	Cross Breed (Unknown X )/ Mongrel		4	Extra Large	F	2014-12-26	FALSE	FALSE
4919	4041	2016-02-22	10	46.5714	326	0	0.893151	young	4.15	6	6	4.26	FALSE	Yes	103	Dachshund (Standard)		2	Medium	F	2015-04-02	FALSE	FALSE
4920	4042	2016-02-22	4	21.4286	150	0	0.410959	young	4.15	6	6	4.26	FALSE	Yes	176	Labradoodle (X Labrador/Poodle)		3	Large	M	2015-09-25	FALSE	TRUE
4923	2944	2016-02-22	17	76.8571	538	1	1.47397	young	4.15	6	6	3.72	FALSE	Yes	59	Border Collie		2	Medium	M	2014-09-02	FALSE	FALSE
4924	2945	2016-02-22	35	154.571	1082	2	2.96438	young	3.84	5.52	5.68	2.19	FALSE	Yes	59	Border Collie		2	Medium	M	2013-03-07	FALSE	TRUE
4904	4033	2016-02-21	5	23.2857	163	0	0.446575	young	3.95	5.39	5.37	2.64	FALSE	Yes	163	Jack/Parson Russell Terrier		1	Small	M	2015-09-11	FALSE	FALSE
4906	4034	2016-02-21	19	83.1429	582	1	1.59452	young	3.81	6	5.91	2.19	FALSE	Yes	177	Retriever - Labrador		3	Large	F	2014-07-19	FALSE	FALSE
4907	1127	2016-02-21	18	80	560	1	1.53425	young	3.83	5.71	5.91	4.09	FALSE	Yes	38	Beagle		2	Medium	F	2014-08-10	FALSE	FALSE
4909	4035	2016-02-21	93	406.286	2844	7	7.79178	middle-aged	4.01	6	6	4.26	TRUE	Yes	128	German Shepherd / Alsatian		3	Large	M	2008-05-09	FALSE	FALSE
4911	4036	2016-02-21	60	260.857	1826	5	5.00274	middle-aged	3.48	5.32	5.9	2.9	FALSE	Yes	136	Retriever - Golden		3	Large	M	2011-02-21	FALSE	FALSE
4901	4031	2016-02-20	16	71.1429	498	1	1.36438	young	3.91	5.91	6	4.26	FALSE	Yes	177	Retriever - Labrador		3	Large	F	2014-10-10	FALSE	FALSE
4892	4027	2016-02-19	59	260.429	1823	4	4.99452	middle-aged	3.53	5.9	5.9	3.52	FALSE	Yes	170	King Charles Spaniel (Standard)		1	Small	F	2011-02-22	FALSE	FALSE
4893	4028	2016-02-19	110	481.143	3368	9	9.2274	old	3.84	6	4.05	4.09	TRUE	Yes	177	Retriever - Labrador		3	Large	M	2006-11-30	FALSE	TRUE
4882	4017	2016-02-18	9	43.1429	302	0	0.827397	young	4.15	5.9	6	3.97	FALSE	Yes	1	Other (Small)		1	Small	F	2015-04-22	FALSE	FALSE
4884	4019	2016-02-18	95	413.286	2893	7	7.92603	middle-aged	4.15	5.39	5.36	4.26	TRUE	Yes	5	Mixed (Medium)		2	Medium	M	2008-03-18	FALSE	FALSE
4885	4020	2016-02-18	29	129.571	907	2	2.48493	young	3.72	6	5.41	3.19	FALSE	Yes	6	Mixed (Large)		3	Large	F	2013-08-25	FALSE	FALSE
4886	4021	2016-02-18	8	35.2857	247	0	0.676712	young	3.63	6	6	4.26	FALSE	Yes	249	Saluki		3	Large	M	2015-06-16	FALSE	FALSE
4887	4022	2016-02-18	3	16.4286	115	0	0.315068	young	4.07	6	6	3.97	FALSE	Yes	4	Mixed (Small)		1	Small	M	2015-10-26	FALSE	FALSE
4890	4024	2016-02-18	17	77.5714	543	1	1.48767	young	3.81	5.9	5.81	3.26	FALSE	Yes	64	Boxer		3	Large	M	2014-08-24	FALSE	FALSE
4869	1758	2016-02-16	21	91.7143	642	1	1.7589	young	3.92	6	6	3.97	FALSE	Yes	59	Border Collie		2	Medium	M	2014-05-15	FALSE	FALSE
4863	4006	2016-02-15	17	77.7143	544	1	1.49041	young	4.15	6	5.36	4.26	FALSE	Yes	261	Shih Tzu		1	Small	M	2014-08-20	FALSE	FALSE
4864	4007	2016-02-15	5	22.7143	159	0	0.435616	young	4.09	6	6	4.26	FALSE	Yes	95	Cockapoo / Cockerpoo / Spoodle (X Spaniel/Poodle)		2	Medium	M	2015-09-09	FALSE	FALSE
4852	4003	2016-02-14	51	223.571	1565	4	4.28767	middle-aged	3.56	5.11	5.01	3.84	FALSE	Yes	96	Spaniel - English Cocker		2	Medium	F	2011-11-02	FALSE	FALSE
4842	1191	2016-02-13	62	271	1897	5	5.19726	middle-aged	4.06	6	5.47	2.68	FALSE	Yes	101	Cross Breed (Unknown X )/ Mongrel		4	Extra Large	F	2010-12-04	FALSE	FALSE
4846	3436	2016-02-13	29	129.714	908	2	2.48767	young	3.74	4.67	6	4.26	FALSE	Yes	309	Yorkshire Terrier		1	Small	M	2013-08-19	FALSE	FALSE
4848	4002	2016-02-13	20	87.2857	611	1	1.67397	young	3.82	6	5.47	1.48	FALSE	Yes	64	Boxer		3	Large	F	2014-06-12	FALSE	FALSE
4850	2369	2016-02-13	13	59.1429	414	1	1.13425	young	4.15	4.83	5.36	3.68	FALSE	Yes	186	Lurcher		3	Large	M	2014-12-26	FALSE	FALSE
4825	2914	2016-02-11	97	422.714	2959	8	8.10685	old	4.15	6	6	4.26	TRUE	Yes	199	Schnauzer (Miniature)		1	Small	M	2008-01-05	FALSE	FALSE
4826	3991	2016-02-11	3	16.4286	115	0	0.315068	young	3.61	4.83	5.54	3.55	FALSE	Yes	100	Coton De Tulear		1	Small	M	2015-10-19	FALSE	FALSE
4828	3994	2016-02-11	40	176.143	1233	3	3.37808	young	3.34	5.81	5.81	3.55	FALSE	Yes	4	Mixed (Small)		1	Small	M	2012-09-26	FALSE	FALSE
4816	3982	2016-02-10	15	66.4286	465	1	1.27397	young	4.01	5.3	6	3.97	FALSE	Yes	4	Mixed (Small)		1	Small	F	2014-11-02	FALSE	FALSE
4817	3985	2016-02-10	28	121.857	853	2	2.33699	young	3.59	5.91	5.8	4.26	FALSE	Yes	231	Pug		1	Small	M	2013-10-10	FALSE	FALSE
4805	3975	2016-02-09	7	31.8571	223	0	0.610959	young	1.92	5.44	5.21	2.96	FALSE	Yes	101	Cross Breed (Unknown X )/ Mongrel		4	Extra Large	F	2015-07-01	FALSE	FALSE
4810	3978	2016-02-09	6	28.8571	202	0	0.553425	young	3.82	5.48	6	3.97	FALSE	Yes	96	Spaniel - English Cocker		2	Medium	F	2015-07-22	FALSE	FALSE
4796	3970	2016-02-08	184	803.143	5622	15	15.4027	old	2.9	4.75	5.8	3.97	TRUE	Yes	303	West Highland White Terrier		1	Small	M	2000-09-17	FALSE	FALSE
4798	3972	2016-02-08	58	252.571	1768	4	4.84384	middle-aged	2.75	5.34	5.46	2.36	FALSE	Yes	6	Mixed (Large)		3	Large	F	2011-04-07	FALSE	FALSE
4788	3967	2016-02-07	38	168.429	1179	3	3.23014	young	4.15	6	6	4.26	FALSE	Yes	59	Border Collie		2	Medium	M	2012-11-15	FALSE	FALSE
4774	3960	2016-02-06	73	320.571	2244	6	6.14795	middle-aged	3.56	5.54	5.36	3.74	TRUE	Yes	245	Rhodesian Ridgeback		3	Large	F	2009-12-15	FALSE	TRUE
4776	3961	2016-02-06	113	492.571	3448	9	9.44658	old	2.32	5.63	4.62	1.11	TRUE	Yes	177	Retriever - Labrador		3	Large	M	2006-08-29	FALSE	FALSE
4778	3963	2016-02-06	73	318.143	2227	6	6.10137	middle-aged	2.16	3.99	3.94	2.13	FALSE	Yes	96	Spaniel - English Cocker		2	Medium	M	2010-01-01	FALSE	FALSE
4769	3363	2016-02-05	41	179.143	1254	3	3.43562	young	4.15	6	5.47	1.48	FALSE	Yes	124	Bulldog - French		1	Small	F	2012-08-30	FALSE	TRUE
4749	3944	2016-02-04	26	116.143	813	2	2.2274	young	3.79	5.9	5.54	1.4	FALSE	Yes	284	Bull Terrier - Staffordshire		2	Medium	M	2013-11-13	FALSE	FALSE
4750	3945	2016-02-04	61	268.714	1881	5	5.15342	middle-aged	4.01	5.48	5.9	4.26	FALSE	Yes	261	Shih Tzu		1	Small	M	2010-12-11	FALSE	FALSE
4751	3946	2016-02-04	30	130.571	914	2	2.50411	young	4.15	5.39	6	3.03	FALSE	Yes	90	Chinese Shar Pei		3	Large	M	2013-08-04	FALSE	FALSE
4753	2921	2016-02-04	10	45.7143	320	0	0.876712	young	3.75	5.91	5.89	3.39	FALSE	Yes	298	Weimaraner		3	Large	M	2015-03-21	FALSE	FALSE
4756	3948	2016-02-04	12	54.4286	381	1	1.04384	young	4.15	6	6	3.97	FALSE	Yes	82	King Charles Spaniel - Cavalier		1	Small	F	2015-01-19	FALSE	FALSE
4762	3951	2016-02-04	36	157.714	1104	3	3.02466	young	3.42	6	5.9	4.26	FALSE	Yes	4	Mixed (Small)		1	Small	M	2013-01-26	FALSE	TRUE
4764	3952	2016-02-04	33	147.286	1031	2	2.82466	young	4.09	6	6	3.97	FALSE	Yes	303	West Highland White Terrier		1	Small	F	2013-04-09	FALSE	FALSE
4765	3953	2016-02-04	27	119.571	837	2	2.29315	young	4.15	5.39	6	4.01	FALSE	Yes	261	Shih Tzu		1	Small	M	2013-10-20	FALSE	FALSE
4766	3954	2016-02-04	27	119.571	837	2	2.29315	young	3.85	6	6	4.26	FALSE	Yes	261	Shih Tzu		1	Small	M	2013-10-20	FALSE	TRUE
4735	3932	2016-02-03	47	206.571	1446	3	3.96164	young	4.03	5.73	5.91	3.26	FALSE	Yes	177	Retriever - Labrador		3	Large	M	2012-02-18	FALSE	TRUE
4737	3934	2016-02-03	54	236.714	1657	4	4.53973	middle-aged	3.56	5.73	6	4.26	FALSE	Yes	5	Mixed (Medium)		2	Medium	F	2011-07-22	FALSE	FALSE
4738	3935	2016-02-03	51	225.714	1580	4	4.32877	middle-aged	3.03	5.91	5.8	3.97	FALSE	Yes	86	Chihuahua - Long Coat		1	Small	M	2011-10-07	FALSE	FALSE
4740	3937	2016-02-03	63	276.429	1935	5	5.30137	middle-aged	3	5.91	5.37	2.15	FALSE	Yes	183	Lhasa Apso		1	Small	M	2010-10-17	FALSE	FALSE
4744	3941	2016-02-03	126	552.286	3866	10	10.5918	old	2.26	5.16	5.58	3.39	TRUE	Yes	40	Bearded Collie		3	Large	F	2005-07-04	FALSE	TRUE
4723	3924	2016-02-02	78	342.143	2395	6	6.56164	middle-aged	2.61	4.83	5.81	2.39	TRUE	Yes	10	Akita - American		3	Large	F	2009-07-13	FALSE	FALSE
4724	3925	2016-02-02	78	339.571	2377	6	6.51233	middle-aged	4.09	6	5.91	3.59	TRUE	Yes	204	Newfoundland		4	Extra Large	F	2009-07-31	FALSE	TRUE
4725	3926	2016-02-02	4	20	140	0	0.383562	young	4.15	6	6	4.26	FALSE	Yes	59	Border Collie		2	Medium	M	2015-09-15	FALSE	FALSE
4712	3918	2016-02-01	40	175.429	1228	3	3.36438	young	4.15	6	6	4.26	FALSE	Yes	163	Jack/Parson Russell Terrier		1	Small	M	2012-09-21	FALSE	TRUE
4715	3919	2016-02-01	8	37.2857	261	0	0.715068	young	4.15	6	6	4.26	FALSE	Yes	2	Other (Medium)		2	Medium	F	2015-05-16	FALSE	FALSE
4719	3922	2016-02-01	114	498.143	3487	9	9.55342	old	3.84	5.91	5.9	3.72	TRUE	Yes	303	West Highland White Terrier		1	Small	M	2006-07-16	FALSE	FALSE
4702	3908	2016-01-31	9	41.8571	293	0	0.80274	young	3.9	6	6	3.97	FALSE	Yes	136	Retriever - Golden		3	Large	F	2015-04-13	FALSE	FALSE
4705	3911	2016-01-31	7	34.8571	244	0	0.668493	young	2.44	5.06	4.95	2.84	FALSE	Yes	72	Bulldog - British		2	Medium	M	2015-06-01	FALSE	FALSE
4706	3912	2016-01-31	33	147.571	1033	2	2.83014	young	4.09	6	5.9	4.26	FALSE	Yes	95	Cockapoo / Cockerpoo / Spoodle (X Spaniel/Poodle)		2	Medium	M	2013-04-03	FALSE	FALSE
4696	3905	2016-01-30	54	235.714	1650	4	4.52055	middle-aged	3.65	5.21	5.4	3.19	FALSE	Yes	24	Australian Kelpie Sheep Dog		2	Medium	F	2011-07-25	FALSE	TRUE
4699	3906	2016-01-30	66	289	2023	5	5.54247	middle-aged	3.48	4.84	5.9	2.36	FALSE	Yes	59	Border Collie		2	Medium	F	2010-07-17	FALSE	FALSE
4693	3902	2016-01-29	31	139.143	974	2	2.66849	young	2.85	5.39	5.9	3.97	FALSE	Yes	95	Cockapoo / Cockerpoo / Spoodle (X Spaniel/Poodle)		2	Medium	M	2013-05-30	FALSE	TRUE
4680	3893	2016-01-28	9	39.7143	278	0	0.761644	young	3.53	6	5.81	2.68	FALSE	Yes	309	Yorkshire Terrier		1	Small	M	2015-04-25	FALSE	FALSE
4684	3894	2016-01-28	64	279.143	1954	5	5.35342	middle-aged	3.92	6	5.9	4.26	FALSE	Yes	231	Pug		1	Small	M	2010-09-22	FALSE	FALSE
4685	3895	2016-01-28	62	269.571	1887	5	5.16986	middle-aged	3.77	6	6	4.26	FALSE	Yes	231	Pug		1	Small	F	2010-11-28	FALSE	FALSE
4669	3884	2016-01-27	10	43.8571	307	0	0.841096	young	3.89	4.74	5.13	3.84	FALSE	Yes	128	German Shepherd / Alsatian		3	Large	M	2015-03-26	FALSE	FALSE
4671	3887	2016-01-27	91	399.429	2796	7	7.66027	middle-aged	3.46	5.72	5.63	4.26	TRUE	Yes	128	German Shepherd / Alsatian		3	Large	M	2008-06-01	FALSE	TRUE
4676	2977	2016-01-27	8	38.7143	271	0	0.742466	young	4.03	5.1	6	4.26	FALSE	Yes	52	Bichon Frise		1	Small	M	2015-05-01	FALSE	FALSE
4678	3892	2016-01-27	17	77.4286	542	1	1.48493	young	4.15	5.39	6	4.26	FALSE	Yes	309	Yorkshire Terrier		1	Small	M	2014-08-03	FALSE	FALSE
4655	3875	2016-01-26	9	42.8571	300	0	0.821918	young	3.06	5.42	5.42	0.52	FALSE	Yes	38	Beagle		2	Medium	F	2015-04-01	FALSE	FALSE
4656	3158	2016-01-26	94	410.286	2872	7	7.86849	middle-aged	4.15	6	6	4.26	TRUE	Yes	177	Retriever - Labrador		3	Large	M	2008-03-16	FALSE	TRUE
4657	3187	2016-01-26	23	103.429	724	1	1.98356	young	3.98	6	6	4.26	FALSE	Yes	116	Eurasier		2	Medium	M	2014-02-01	FALSE	TRUE
4662	3879	2016-01-26	52	228.571	1600	4	4.38356	middle-aged	3.62	5.82	5.26	2.77	FALSE	Yes	98	Collie - Rough Coat		2	Medium	F	2011-09-09	FALSE	FALSE
4664	3882	2016-01-26	50	217.429	1522	4	4.16986	middle-aged	3.43	4.15	6	4.26	FALSE	Yes	136	Retriever - Golden		3	Large	M	2011-11-26	FALSE	FALSE
4645	2764	2016-01-25	14	61.7143	432	1	1.18356	young	3.88	5.9	5.73	2.9	FALSE	Yes	186	Lurcher		3	Large	M	2014-11-19	FALSE	FALSE
4652	3874	2016-01-25	5	22.7143	159	0	0.435616	young	4.15	6	6	2.52	FALSE	Yes	265	Husky - Siberian		3	Large	M	2015-08-19	FALSE	FALSE
4637	3863	2016-01-24	3	17.1429	120	0	0.328767	young	3.53	6	5.72	3.55	FALSE	Yes	96	Spaniel - English Cocker		2	Medium	M	2015-09-26	FALSE	FALSE
4638	3864	2016-01-24	148	646.571	4526	12	12.4	old	3.57	5.91	4.81	3.91	TRUE	Yes	128	German Shepherd / Alsatian		3	Large	M	2003-09-03	FALSE	FALSE
4624	3851	2016-01-23	37	161.571	1131	3	3.09863	young	3.64	5.43	5.71	2.56	FALSE	Yes	274	Spaniel - English Springer		2	Medium	M	2012-12-18	FALSE	FALSE
4625	3855	2016-01-23	90	393.857	2757	7	7.55342	middle-aged	3.69	6	5.9	2.56	TRUE	Yes	261	Shih Tzu		1	Small	M	2008-07-06	FALSE	FALSE
4628	3856	2016-01-23	105	458.286	3208	8	8.78904	old	3.17	5.91	3.39	3.74	TRUE	Yes	274	Spaniel - English Springer		2	Medium	F	2007-04-12	FALSE	FALSE
4630	3327	2016-01-23	8	35.2857	247	0	0.676712	young	3.67	5.65	5.35	3.91	FALSE	Yes	38	Beagle		2	Medium	M	2015-05-21	FALSE	FALSE
4634	3860	2016-01-23	14	62.5714	438	1	1.2	young	4.15	6	6	2.65	FALSE	Yes	303	West Highland White Terrier		1	Small	F	2014-11-11	FALSE	TRUE
4635	3861	2016-01-23	6	28.5714	200	0	0.547945	young	3.08	6	5.61	3.39	FALSE	Yes	101	Cross Breed (Unknown X )/ Mongrel		4	Extra Large	M	2015-07-07	FALSE	TRUE
4612	3840	2016-01-22	39	171	1197	3	3.27945	young	4.08	6	4.31	4.09	FALSE	Yes	46	Belgian Shepherd Dog - Malinois		3	Large	M	2012-10-12	FALSE	FALSE
4617	3846	2016-01-22	12	52.1429	365	1	1	young	4.15	6	6	4.26	FALSE	Yes	59	Border Collie		2	Medium	M	2015-01-22	FALSE	TRUE
4618	3847	2016-01-22	90	393.429	2754	7	7.54521	middle-aged	3.48	6	5.24	4.26	TRUE	Yes	261	Shih Tzu		1	Small	F	2008-07-08	FALSE	TRUE
4619	3848	2016-01-22	6	30.1429	211	0	0.578082	young	3.95	5.82	6	4.26	FALSE	Yes	177	Retriever - Labrador		3	Large	F	2015-06-25	FALSE	FALSE
4589	3824	2016-01-21	8	36.8571	258	0	0.706849	young	4.15	6	6	2.52	FALSE	Yes	136	Retriever - Golden		3	Large	M	2015-05-08	FALSE	FALSE
4590	3825	2016-01-21	28	124	868	2	2.37808	young	3.93	6	5.91	3.8	FALSE	Yes	82	King Charles Spaniel - Cavalier		1	Small	F	2013-09-05	FALSE	FALSE
4597	3832	2016-01-21	4	18.7143	131	0	0.358904	young	2.86	5.51	5.59	2.72	FALSE	Yes	265	Husky - Siberian		3	Large	M	2015-09-12	FALSE	FALSE
4600	3834	2016-01-21	54	238.857	1672	4	4.58082	middle-aged	3.55	5.62	5.67	3.19	FALSE	Yes	101	Cross Breed (Unknown X )/ Mongrel		4	Extra Large	F	2011-06-24	FALSE	TRUE
4602	3835	2016-01-21	7	31.4286	220	0	0.60274	young	4.15	6	6	2.65	FALSE	Yes	95	Cockapoo / Cockerpoo / Spoodle (X Spaniel/Poodle)		2	Medium	M	2015-06-15	FALSE	FALSE
4605	3839	2016-01-21	13	57.5714	403	1	1.10411	young	3.84	5.54	6	2.81	FALSE	Yes	10	Akita - American		3	Large	F	2014-12-14	FALSE	FALSE
4575	3815	2016-01-20	20	89.2857	625	1	1.71233	young	3.05	5.82	5.81	3.55	FALSE	Yes	95	Cockapoo / Cockerpoo / Spoodle (X Spaniel/Poodle)		2	Medium	F	2014-05-05	FALSE	FALSE
4576	2831	2016-01-20	18	79.5714	557	1	1.52603	young	3.59	6	5.9	3.72	FALSE	Yes	96	Spaniel - English Cocker		2	Medium	M	2014-07-12	FALSE	TRUE
4578	3817	2016-01-20	41	180.714	1265	3	3.46575	young	3.95	5.92	6	4.01	FALSE	Yes	136	Retriever - Golden		3	Large	M	2012-08-03	FALSE	TRUE
4567	3808	2016-01-19	3	16.8571	118	0	0.323288	young	3.59	5.13	6	4.26	FALSE	Yes	5	Mixed (Medium)		2	Medium	F	2015-09-23	FALSE	FALSE
4569	3809	2016-01-19	34	150.571	1054	2	2.88767	young	4.15	6	6	3.14	FALSE	Yes	128	German Shepherd / Alsatian		3	Large	M	2013-03-01	FALSE	FALSE
4570	3810	2016-01-19	20	88.1429	617	1	1.69041	young	3.61	5.71	5.7	3.39	FALSE	Yes	309	Yorkshire Terrier		1	Small	M	2014-05-12	FALSE	FALSE
4572	3813	2016-01-19	10	46.1429	323	0	0.884932	young	4.15	5.39	6	4.26	FALSE	Yes	177	Retriever - Labrador		3	Large	M	2015-03-02	FALSE	TRUE
4559	2353	2016-01-18	23	101.286	709	1	1.94247	young	4.15	6	5.47	4.26	FALSE	Yes	177	Retriever - Labrador		3	Large	F	2014-02-08	FALSE	FALSE
4562	3803	2016-01-18	36	157.714	1104	3	3.02466	young	3.64	5.9	5.8	3.68	FALSE	Yes	4	Mixed (Small)		1	Small	F	2013-01-09	FALSE	FALSE
4565	1558	2016-01-18	50	218.571	1530	4	4.19178	middle-aged	3.63	6	5.8	4.26	FALSE	Yes	136	Retriever - Golden		3	Large	F	2011-11-10	FALSE	FALSE
4556	3797	2016-01-17	8	37.2857	261	0	0.715068	young	3.79	5.54	6	4.26	FALSE	Yes	6	Mixed (Large)		3	Large	M	2015-05-01	FALSE	FALSE
4544	3789	2016-01-16	15	68	476	1	1.30411	young	4.15	5.39	5.47	3.22	FALSE	Yes	5	Mixed (Medium)		2	Medium	M	2014-09-27	FALSE	FALSE
4545	2808	2016-01-16	53	230.571	1614	4	4.42192	middle-aged	3.98	6	6	4.26	FALSE	Yes	284	Bull Terrier - Staffordshire		2	Medium	F	2011-08-16	FALSE	FALSE
4551	3793	2016-01-16	61	267.571	1873	5	5.13151	middle-aged	4.03	5.74	5.47	1.07	FALSE	Yes	284	Bull Terrier - Staffordshire		2	Medium	M	2010-11-30	FALSE	TRUE
4552	3794	2016-01-16	61	268.286	1878	5	5.14521	middle-aged	4.06	6	6	4.26	FALSE	Yes	261	Shih Tzu		1	Small	M	2010-11-25	FALSE	FALSE
4539	2179	2016-01-15	36	158.429	1109	3	3.03836	young	2.72	5.31	5.9	3.97	FALSE	Yes	4	Mixed (Small)		1	Small	F	2013-01-01	FALSE	FALSE
4543	3788	2016-01-15	26	116	812	2	2.22466	young	4.15	6	6	4.26	FALSE	Yes	265	Husky - Siberian		3	Large	F	2013-10-25	FALSE	FALSE
4532	3779	2016-01-14	4	20	140	0	0.383562	young	4.15	6	6	4.26	FALSE	Yes	101	Cross Breed (Unknown X )/ Mongrel		4	Extra Large	F	2015-08-27	FALSE	FALSE
4538	3784	2016-01-14	21	91.4286	640	1	1.75342	young	4.09	5.01	6	2.52	FALSE	Yes	303	West Highland White Terrier		1	Small	F	2014-04-14	FALSE	TRUE
4518	3773	2016-01-13	14	61.4286	430	1	1.17808	young	3.06	4.97	4.43	3.38	FALSE	Yes	13	Malamute - Alaskan		4	Extra Large	F	2014-11-09	FALSE	FALSE
4519	1815	2016-01-13	111	483.714	3386	9	9.27671	old	3.71	5.81	5.9	3.97	TRUE	Yes	136	Retriever - Golden		3	Large	F	2006-10-06	FALSE	FALSE
4525	1246	2016-01-13	50	218.714	1531	4	4.19452	middle-aged	3.63	6	6	3.77	FALSE	Yes	59	Border Collie		2	Medium	F	2011-11-04	FALSE	FALSE
4527	3775	2016-01-13	77	337.286	2361	6	6.46849	middle-aged	3.79	5.73	5.56	3.97	TRUE	Yes	177	Retriever - Labrador		3	Large	M	2009-07-27	FALSE	FALSE
4528	3776	2016-01-13	20	87.8571	615	1	1.68493	young	3.9	6	6	4.26	FALSE	Yes	186	Lurcher		3	Large	F	2014-05-08	FALSE	FALSE
4529	3777	2016-01-13	7	32.1429	225	0	0.616438	young	4.15	6	6	3.72	FALSE	Yes	5	Mixed (Medium)		2	Medium	F	2015-06-02	FALSE	FALSE
4531	3778	2016-01-13	124	539.714	3778	10	10.3507	old	4.15	6	4.97	4.26	TRUE	Yes	59	Border Collie		2	Medium	F	2005-09-09	FALSE	FALSE
4508	3762	2016-01-12	151	656.714	4597	12	12.5945	old	3.71	5.43	5.41	3.55	TRUE	Yes	5	Mixed (Medium)		2	Medium	M	2003-06-12	FALSE	TRUE
4510	3764	2016-01-12	34	150.286	1052	2	2.88219	young	4.15	6	5.36	3.43	FALSE	Yes	186	Lurcher		3	Large	F	2013-02-24	FALSE	TRUE
4511	3765	2016-01-12	154	669.857	4689	12	12.8466	old	3.67	5.81	5.89	4.26	TRUE	Yes	177	Retriever - Labrador		3	Large	M	2003-03-12	FALSE	FALSE
4514	3768	2016-01-12	30	131.143	918	2	2.51507	young	3.79	6	5.8	3.97	FALSE	Yes	52	Bichon Frise		1	Small	M	2013-07-08	FALSE	TRUE
4501	2792	2016-01-11	20	87.7143	614	1	1.68219	young	3.98	6	6	4.26	FALSE	Yes	199	Schnauzer (Miniature)		1	Small	M	2014-05-07	FALSE	FALSE
4503	3755	2016-01-11	17	74	518	1	1.41918	young	4.07	6	6	4.26	FALSE	Yes	5	Mixed (Medium)		2	Medium	F	2014-08-11	FALSE	FALSE
4494	3750	2016-01-10	5	22.8571	160	0	0.438356	young	3.76	5.28	5.8	3.55	FALSE	Yes	95	Cockapoo / Cockerpoo / Spoodle (X Spaniel/Poodle)		2	Medium	M	2015-08-03	FALSE	FALSE
4497	3609	2016-01-10	8	36	252	0	0.690411	young	4.15	6	6	4.26	FALSE	Yes	4	Mixed (Small)		1	Small	F	2015-05-03	FALSE	FALSE
4484	3743	2016-01-09	76	331.571	2321	6	6.3589	middle-aged	3.74	5.91	6	4.26	TRUE	Yes	59	Border Collie		2	Medium	M	2009-09-01	FALSE	FALSE
4485	3744	2016-01-09	58	252.857	1770	4	4.84932	middle-aged	3.71	6	5.8	4.26	FALSE	Yes	259	Shetland / Sheltie Sheepdog		2	Medium	M	2011-03-06	FALSE	FALSE
4488	3746	2016-01-09	127	553.714	3876	10	10.6192	old	4.09	6	5.35	4.09	TRUE	Yes	104	Dalmation		3	Large	M	2005-05-30	FALSE	FALSE
4489	3747	2016-01-09	66	289.714	2028	5	5.55616	middle-aged	4.15	5.39	6	4.26	FALSE	Yes	104	Dalmation		3	Large	F	2010-06-21	FALSE	FALSE
4474	3733	2016-01-08	5	22	154	0	0.421918	young	4.15	5.79	6	3.39	FALSE	Yes	183	Lhasa Apso		1	Small	F	2015-08-07	FALSE	FALSE
4476	3734	2016-01-08	12	55.5714	389	1	1.06575	young	3.88	6	5.77	4.26	FALSE	Yes	59	Border Collie		2	Medium	F	2014-12-15	FALSE	FALSE
4478	3127	2016-01-08	9	42	294	0	0.805479	young	2.48	5.38	5.49	4.26	FALSE	Yes	72	Bulldog - British		2	Medium	F	2015-03-20	FALSE	FALSE
4461	3721	2016-01-06	44	194	1358	3	3.72055	young	3.61	6	5.24	2.62	FALSE	Yes	5	Mixed (Medium)		2	Medium	F	2012-04-18	FALSE	FALSE
4463	3723	2016-01-06	30	132.571	928	2	2.54247	young	4.15	6	6	4.26	FALSE	Yes	96	Spaniel - English Cocker		2	Medium	F	2013-06-22	FALSE	FALSE
4464	3724	2016-01-06	83	362.429	2537	6	6.95068	middle-aged	3.57	5.39	6	4.26	TRUE	Yes	96	Spaniel - English Cocker		2	Medium	F	2009-01-25	FALSE	TRUE
4466	3726	2016-01-06	10	46.1429	323	0	0.884932	young	4.15	4.77	5.47	1.48	FALSE	Yes	60	Border Terrier		1	Small	F	2015-02-17	FALSE	FALSE
4467	3727	2016-01-06	8	38.7143	271	0	0.742466	young	4.15	6	6	4.26	FALSE	Yes	274	Spaniel - English Springer		2	Medium	M	2015-04-10	FALSE	FALSE
4441	3696	2016-01-05	82	357.286	2501	6	6.85205	middle-aged	3.81	5.39	6	2.52	TRUE	Yes	163	Jack/Parson Russell Terrier		1	Small	F	2009-03-01	FALSE	FALSE
4442	3697	2016-01-05	47	208	1456	3	3.98904	young	4.15	6	6	4.26	FALSE	Yes	4	Mixed (Small)		1	Small	F	2012-01-10	FALSE	FALSE
4443	3698	2016-01-05	7	34.1429	239	0	0.654795	young	4.15	6	6	4.26	FALSE	Yes	274	Spaniel - English Springer		2	Medium	M	2015-05-11	FALSE	FALSE
4446	3701	2016-01-05	68	297.429	2082	5	5.70411	middle-aged	3.55	5.91	5.68	4.26	FALSE	Yes	6	Mixed (Large)		3	Large	M	2010-04-24	FALSE	FALSE
4447	3702	2016-01-05	14	61.7143	432	1	1.18356	young	4.15	6	6	4.26	FALSE	Yes	124	Bulldog - French		1	Small	M	2014-10-30	FALSE	FALSE
4448	3703	2016-01-05	4	18	126	0	0.345205	young	3.16	5.91	5.8	3.72	FALSE	Yes	6	Mixed (Large)		3	Large	F	2015-09-01	FALSE	FALSE
4430	3686	2016-01-04	4	19.1429	134	0	0.367123	young	3.9	5.62	6	3.97	FALSE	Yes	6	Mixed (Large)		3	Large	M	2015-08-23	FALSE	FALSE
4435	3690	2016-01-04	53	232.143	1625	4	4.45205	middle-aged	3.71	6	6	4.26	FALSE	Yes	96	Spaniel - English Cocker		2	Medium	M	2011-07-24	FALSE	FALSE
4424	3679	2016-01-03	36	157.714	1104	3	3.02466	young	4.15	5.44	6	4.26	FALSE	Yes	4	Mixed (Small)		1	Small	F	2012-12-25	FALSE	FALSE
4416	3076	2016-01-02	10	44.1429	309	0	0.846575	young	4.15	6	6	4.26	FALSE	Yes	24	Australian Kelpie Sheep Dog		2	Medium	F	2015-02-27	FALSE	FALSE
4420	2154	2016-01-02	21	91.8571	643	1	1.76164	young	3.77	6	6	4.01	FALSE	Yes	156	Setter - Irish		3	Large	F	2014-03-30	FALSE	FALSE
4406	3118	2015-12-31	147	639.286	4475	12	12.2603	old	4.03	5.2	5.8	3.39	TRUE	Yes	101	Cross Breed (Unknown X )/ Mongrel		4	Extra Large	M	2003-09-30	FALSE	TRUE
4408	2634	2015-12-31	78	343.429	2404	6	6.5863	middle-aged	3.64	5.43	5.34	1.99	TRUE	Yes	64	Boxer		3	Large	F	2009-06-01	FALSE	FALSE
4411	2305	2015-12-31	68	297.714	2084	5	5.70959	middle-aged	4.15	6	6	4.26	FALSE	Yes	74	Cairn Terrier		1	Small	M	2010-04-17	FALSE	FALSE
4392	3659	2015-12-29	74	322.429	2257	6	6.18356	middle-aged	3.07	5.35	5.37	1.88	TRUE	Yes	144	Greyhound		3	Large	F	2009-10-24	FALSE	FALSE
4396	3662	2015-12-29	30	133.714	936	2	2.56438	young	3.56	5.39	5.91	3.8	FALSE	Yes	59	Border Collie		2	Medium	M	2013-06-06	FALSE	FALSE
4397	3663	2015-12-29	10	46.2857	324	0	0.887671	young	4.01	6	6	2.81	FALSE	Yes	96	Spaniel - English Cocker		2	Medium	M	2015-02-08	FALSE	FALSE
4398	3664	2015-12-29	26	117.143	820	2	2.24658	young	3.33	6	5.81	3.55	FALSE	Yes	52	Bichon Frise		1	Small	M	2013-09-30	FALSE	FALSE
4399	3665	2015-12-29	79	345	2415	6	6.61644	middle-aged	3.59	6	5.81	3.55	TRUE	Yes	176	Labradoodle (X Labrador/Poodle)		3	Large	M	2009-05-19	FALSE	FALSE
4379	3654	2015-12-28	28	123.143	862	2	2.36164	young	4.15	4.83	5.36	4.26	FALSE	Yes	284	Bull Terrier - Staffordshire		2	Medium	M	2013-08-18	FALSE	FALSE
4383	2635	2015-12-28	14	64.7143	453	1	1.2411	young	3.79	5.69	5.8	3.97	FALSE	Yes	96	Spaniel - English Cocker		2	Medium	M	2014-10-01	FALSE	FALSE
4384	3655	2015-12-28	33	144.714	1013	2	2.77534	young	3.66	5.23	5.02	2.55	FALSE	Yes	224	Poodle (Miniature)		2	Medium	M	2013-03-20	FALSE	FALSE
4385	3656	2015-12-28	39	169.714	1188	3	3.25479	young	3.73	6	5.9	3.39	FALSE	Yes	177	Retriever - Labrador		3	Large	M	2012-09-26	FALSE	TRUE
4387	3045	2015-12-28	84	368.143	2577	7	7.06027	middle-aged	2.92	5.36	5.7	4.26	TRUE	Yes	86	Chihuahua - Long Coat		1	Small	M	2008-12-07	FALSE	FALSE
4388	3657	2015-12-28	110	480.857	3366	9	9.22192	old	3.71	5.82	5.26	3.23	TRUE	Yes	101	Cross Breed (Unknown X )/ Mongrel		4	Extra Large	M	2006-10-10	FALSE	TRUE
4389	2890	2015-12-28	140	609.286	4265	11	11.6849	old	3.61	5.81	6	3.72	TRUE	Yes	163	Jack/Parson Russell Terrier		1	Small	M	2004-04-24	FALSE	FALSE
4376	3652	2015-12-27	19	86.8571	608	1	1.66575	young	3.87	6	6	3.97	FALSE	Yes	199	Schnauzer (Miniature)		1	Small	F	2014-04-28	FALSE	FALSE
4377	3653	2015-12-27	62	272	1904	5	5.21644	middle-aged	3.6	6	5.91	3.55	FALSE	Yes	211	Old English Sheepdog		3	Large	M	2010-10-10	FALSE	FALSE
4371	3113	2015-12-26	6	28.1429	197	0	0.539726	young	4.15	6	6	3.39	FALSE	Yes	274	Spaniel - English Springer		2	Medium	F	2015-06-12	FALSE	FALSE
4365	3648	2015-12-25	108	469.714	3288	9	9.00822	old	3.95	5.39	5.57	4.26	TRUE	Yes	177	Retriever - Labrador		3	Large	M	2006-12-24	FALSE	FALSE
4366	3649	2015-12-25	45	199.286	1395	3	3.82192	young	3.52	5.72	5.9	4.01	FALSE	Yes	101	Cross Breed (Unknown X )/ Mongrel		4	Extra Large	M	2012-02-29	FALSE	FALSE
4359	1252	2015-12-24	79	343.571	2405	6	6.58904	middle-aged	3.77	6	6	3.97	TRUE	Yes	59	Border Collie		2	Medium	F	2009-05-24	FALSE	FALSE
4364	3647	2015-12-24	4	18.5714	130	0	0.356164	young	4.07	5.39	6	3.19	FALSE	Yes	274	Spaniel - English Springer		2	Medium	F	2015-08-16	FALSE	FALSE
4349	3636	2015-12-22	115	503.429	3524	9	9.65479	old	4.15	6	6	4.26	TRUE	Yes	59	Border Collie		2	Medium	F	2006-04-29	FALSE	FALSE
4353	3638	2015-12-22	7	33.4286	234	0	0.641096	young	3.42	5.83	5.81	3.26	FALSE	Yes	60	Border Terrier		1	Small	F	2015-05-02	FALSE	FALSE
4355	2624	2015-12-22	8	36.5714	256	0	0.70137	young	2.08	3.99	3.94	2.13	FALSE	Yes	95	Cockapoo / Cockerpoo / Spoodle (X Spaniel/Poodle)		2	Medium	M	2015-04-10	FALSE	FALSE
4337	3627	2015-12-21	13	60.5714	424	1	1.16164	young	3.54	5.74	6	3.97	FALSE	Yes	11	Husky - Alaskan		3	Large	M	2014-10-23	FALSE	FALSE
4341	3190	2015-12-21	61	268.143	1877	5	5.14247	middle-aged	3.61	5.74	5.5	3.97	FALSE	Yes	274	Spaniel - English Springer		2	Medium	M	2010-10-31	FALSE	FALSE
4342	3629	2015-12-21	5	25.1429	176	0	0.482192	young	3.79	5.61	5.91	3.26	FALSE	Yes	274	Spaniel - English Springer		2	Medium	F	2015-06-28	FALSE	FALSE
4343	3630	2015-12-21	84	366.571	2566	7	7.03014	middle-aged	3.83	6	5.9	4.26	TRUE	Yes	6	Mixed (Large)		3	Large	F	2008-12-11	FALSE	FALSE
4331	3622	2015-12-20	98	428.571	3000	8	8.21918	old	3.15	5.07	5.67	2.48	TRUE	Yes	152	Hungarian Vizsla		3	Large	F	2007-10-03	FALSE	TRUE
4334	3625	2015-12-20	179	780.143	5461	14	14.9616	old	2.42	5.22	4.69	3.39	TRUE	Yes	60	Border Terrier		1	Small	F	2001-01-06	FALSE	TRUE
4321	3614	2015-12-19	7	32.7143	229	0	0.627397	young	4.15	6	6	3.43	FALSE	Yes	101	Cross Breed (Unknown X )/ Mongrel		4	Extra Large	M	2015-05-04	FALSE	FALSE
4322	3615	2015-12-19	11	49.8571	349	0	0.956164	young	3.88	4.88	5.72	3.8	FALSE	Yes	6	Mixed (Large)		3	Large	F	2015-01-04	FALSE	FALSE
4324	3617	2015-12-19	17	76.5714	536	1	1.46849	young	4.15	5.38	6	4.26	FALSE	Yes	96	Spaniel - English Cocker		2	Medium	M	2014-07-01	FALSE	FALSE
4327	3619	2015-12-19	9	41.8571	293	0	0.80274	young	4.15	6	6	3.97	FALSE	Yes	5	Mixed (Medium)		2	Medium	F	2015-03-01	FALSE	FALSE
4329	3620	2015-12-19	119	518.857	3632	9	9.95068	old	3.53	5.36	4.09	3.74	TRUE	Yes	177	Retriever - Labrador		3	Large	M	2006-01-08	FALSE	FALSE
4317	3007	2015-12-18	30	132.143	925	2	2.53425	young	3.81	5.69	5.8	4.26	FALSE	Yes	101	Cross Breed (Unknown X )/ Mongrel		4	Extra Large	M	2013-06-06	FALSE	TRUE
4320	3611	2015-12-18	18	79.4286	556	1	1.52329	young	3.99	5.16	6	3.39	FALSE	Yes	5	Mixed (Medium)		2	Medium	M	2014-06-10	FALSE	FALSE
4310	3605	2015-12-17	14	64.2857	450	1	1.23288	young	4.15	6	6	4.26	FALSE	Yes	5	Mixed (Medium)		2	Medium	F	2014-09-23	FALSE	FALSE
4312	3607	2015-12-17	19	83.5714	585	1	1.60274	young	3.92	6	5.9	4.26	FALSE	Yes	6	Mixed (Large)		3	Large	M	2014-05-11	FALSE	FALSE
4297	3079	2015-12-16	7	30.8571	216	0	0.591781	young	4.15	5.48	5.36	4.26	FALSE	Yes	95	Cockapoo / Cockerpoo / Spoodle (X Spaniel/Poodle)		2	Medium	F	2015-05-14	FALSE	FALSE
4298	2391	2015-12-16	10	45.7143	320	0	0.876712	young	3.55	5.52	5.59	2.1	FALSE	Yes	5	Mixed (Medium)		2	Medium	F	2015-01-30	FALSE	FALSE
4299	3595	2015-12-16	31	138.429	969	2	2.65479	young	4.03	4.82	5.5	4.26	FALSE	Yes	304	Whippet		2	Medium	F	2013-04-21	FALSE	TRUE
4302	3070	2015-12-16	5	23.7143	166	0	0.454795	young	4.15	6	5.12	4.26	FALSE	Yes	4	Mixed (Small)		1	Small	M	2015-07-03	FALSE	FALSE
4303	3598	2015-12-16	61	266.714	1867	5	5.11507	middle-aged	4.03	5.79	6	3.19	FALSE	Yes	59	Border Collie		2	Medium	M	2010-11-05	FALSE	TRUE
4285	3584	2015-12-15	6	27.5714	193	0	0.528767	young	3.87	6	6	4.26	FALSE	Yes	95	Cockapoo / Cockerpoo / Spoodle (X Spaniel/Poodle)		2	Medium	F	2015-06-05	FALSE	FALSE
4290	3589	2015-12-15	91	399.429	2796	7	7.66027	middle-aged	2.54	5.22	4.39	2.68	TRUE	Yes	309	Yorkshire Terrier		1	Small	F	2008-04-19	FALSE	FALSE
4292	3591	2015-12-15	33	143.714	1006	2	2.75616	young	2.39	5.2	5.8	2.61	FALSE	Yes	261	Shih Tzu		1	Small	F	2013-03-14	FALSE	FALSE
4293	3592	2015-12-15	95	414.571	2902	7	7.95068	middle-aged	3.96	5.63	6	4.26	TRUE	Yes	177	Retriever - Labrador		3	Large	F	2008-01-04	FALSE	FALSE
4295	3593	2015-12-15	24	104.286	730	2	2	young	3.58	6	5.82	3.38	FALSE	Yes	284	Bull Terrier - Staffordshire		2	Medium	F	2013-12-15	FALSE	FALSE
4275	3574	2015-12-14	43	187.429	1312	3	3.59452	young	2.95	5.91	5.41	2.78	FALSE	Yes	5	Mixed (Medium)		2	Medium	M	2012-05-11	FALSE	FALSE
4276	1437	2015-12-14	106	461.571	3231	8	8.85205	old	3.46	5.91	5.15	4.26	TRUE	Yes	303	West Highland White Terrier		1	Small	F	2007-02-08	FALSE	FALSE
4277	3575	2015-12-14	4	18.7143	131	0	0.358904	young	4.15	5.39	6	4.26	FALSE	Yes	101	Cross Breed (Unknown X )/ Mongrel		4	Extra Large	F	2015-08-05	FALSE	FALSE
4280	3579	2015-12-14	47	205	1435	3	3.93151	young	4.01	5.9	5.82	3.38	FALSE	Yes	101	Cross Breed (Unknown X )/ Mongrel		4	Extra Large	M	2012-01-09	FALSE	TRUE
4283	3582	2015-12-14	7	31.1429	218	0	0.59726	young	3.7	5.49	6	3.14	FALSE	Yes	121	Fox Terrier - Smooth		2	Medium	M	2015-05-10	FALSE	FALSE
4266	1584	2015-12-13	37	164.571	1152	3	3.15616	young	4.15	6	6	3.97	FALSE	Yes	246	Rottweiler		3	Large	M	2012-10-17	FALSE	FALSE
4267	3567	2015-12-13	64	281	1967	5	5.38904	middle-aged	3.59	5.91	5.9	4.26	FALSE	Yes	96	Spaniel - English Cocker		2	Medium	M	2010-07-25	FALSE	TRUE
4270	3570	2015-12-13	22	97	679	1	1.86027	young	4.15	6	5.47	1.52	FALSE	Yes	177	Retriever - Labrador		3	Large	F	2014-02-02	FALSE	FALSE
4272	3572	2015-12-13	5	23.7143	166	0	0.454795	young	4.03	5.39	6	3.97	FALSE	Yes	309	Yorkshire Terrier		1	Small	F	2015-06-30	FALSE	FALSE
4260	3561	2015-12-12	7	33.2857	233	0	0.638356	young	3.55	4.98	3.63	3.72	FALSE	Yes	96	Spaniel - English Cocker		2	Medium	M	2015-04-23	FALSE	FALSE
4263	3565	2015-12-12	59	259	1813	4	4.96712	middle-aged	4.03	5.91	5.9	2.81	FALSE	Yes	274	Spaniel - English Springer		2	Medium	F	2010-12-25	FALSE	FALSE
4249	3553	2015-12-11	15	69	483	1	1.32329	young	3.77	4.83	4.48	4.26	FALSE	Yes	136	Retriever - Golden		3	Large	F	2014-08-15	FALSE	FALSE
4252	3555	2015-12-11	38	167.429	1172	3	3.21096	young	4.15	6	6	4.26	FALSE	Yes	274	Spaniel - English Springer		2	Medium	F	2012-09-25	FALSE	FALSE
4253	3556	2015-12-11	85	370.429	2593	7	7.10411	middle-aged	3.84	6	5.9	4.26	TRUE	Yes	177	Retriever - Labrador		3	Large	M	2008-11-04	FALSE	FALSE
4242	3548	2015-12-10	60	262.143	1835	5	5.0274	middle-aged	3.73	5.39	5.32	3.39	FALSE	Yes	144	Greyhound		3	Large	F	2010-12-01	FALSE	TRUE
4235	3540	2015-12-09	67	291.857	2043	5	5.59726	middle-aged	3.11	5.91	5.61	4.26	FALSE	Yes	163	Jack/Parson Russell Terrier		1	Small	F	2010-05-06	FALSE	TRUE
4236	3541	2015-12-09	99	431.571	3021	8	8.27671	old	3.72	6	4.79	3.55	TRUE	Yes	177	Retriever - Labrador		3	Large	M	2007-09-01	FALSE	FALSE
4227	3535	2015-12-08	49	214	1498	4	4.10411	middle-aged	3.96	6	5.02	3.91	FALSE	Yes	274	Spaniel - English Springer		2	Medium	M	2011-11-01	FALSE	FALSE
4228	3536	2015-12-08	96	418.429	2929	8	8.02466	old	3.69	5.13	5.18	4.26	TRUE	Yes	177	Retriever - Labrador		3	Large	F	2007-12-01	FALSE	FALSE
4229	2892	2015-12-08	102	445.429	3118	8	8.54247	old	4.09	6	5.9	4.26	TRUE	Yes	163	Jack/Parson Russell Terrier		1	Small	M	2007-05-26	FALSE	TRUE
4211	3527	2015-12-06	152	664.571	4652	12	12.7452	old	2.7	4.87	5.38	4.26	TRUE	Yes	96	Spaniel - English Cocker		2	Medium	M	2003-03-12	FALSE	TRUE
4212	3528	2015-12-06	68	296.714	2077	5	5.69041	middle-aged	3.05	4.57	5.04	1.48	FALSE	Yes	199	Schnauzer (Miniature)		1	Small	M	2010-03-30	FALSE	FALSE
4204	3522	2015-12-05	6	26.1429	183	0	0.50137	young	4.02	6	5.9	2.36	FALSE	Yes	5	Mixed (Medium)		2	Medium	M	2015-06-05	FALSE	FALSE
4201	3520	2015-12-04	5	23	161	0	0.441096	young	4.01	6	6	4.26	FALSE	Yes	128	German Shepherd / Alsatian		3	Large	M	2015-06-26	FALSE	FALSE
4189	3511	2015-12-03	26	116.714	817	2	2.23836	young	2.9	4.87	6	3.77	FALSE	Yes	6	Mixed (Large)		3	Large	F	2013-09-07	FALSE	FALSE
4191	1600	2015-12-03	101	439.714	3078	8	8.43288	old	3.6	6	5.9	4.01	TRUE	Yes	144	Greyhound		3	Large	M	2007-06-30	FALSE	FALSE
4188	3508	2015-12-02	31	138.429	969	2	2.65479	young	3.78	5.19	5.91	1.94	FALSE	Yes	177	Retriever - Labrador		3	Large	M	2013-04-07	FALSE	TRUE
4183	3504	2015-12-01	43	190	1330	3	3.64384	young	3.64	5.21	6	4.26	FALSE	Yes	4	Mixed (Small)		1	Small	F	2012-04-10	FALSE	FALSE
4185	3506	2015-12-01	35	154.429	1081	2	2.96164	young	4.09	5.31	6	4.26	FALSE	Yes	4	Mixed (Small)		1	Small	F	2012-12-15	FALSE	FALSE
4177	3498	2015-11-30	21	92.5714	648	1	1.77534	young	4.15	6	5.47	0.58	FALSE	Yes	226	Poodle (Toy)		1	Small	M	2014-02-20	FALSE	FALSE
4181	3502	2015-11-30	9	43.1429	302	0	0.827397	young	4.07	6	6	3.97	FALSE	Yes	101	Cross Breed (Unknown X )/ Mongrel		4	Extra Large	F	2015-02-01	FALSE	FALSE
[truncated: 1,412 more rows]

## Sheet: master male female
Female	Male		Female entire	Female neutered	Male entire	Male neutered
1598	1813		1408	190	1626	187

## Sheet: mixed or other
QuestionnaireID	Match Questionnaire ID	PetId	Match PetId between our data and Zoetis data	DEMO or Practice	Date Completed	Age (months)	Age (weeks)	Age (days)	Age (years)	Age years by days/365	Active	Uncomfortable	Playful	Lethargic	Happy	Limping	Tired	Comfortable	Unhappy	Calm	Stiff	Bright	Groaning	Fun-loving	Listless	Relaxed	Athletic	Sad	Depressed	Energetic	Sore	Confused	Energetic/Enthusiastic	NormalisedScore	Happy/Content	NormalisedScore	Active/Comfortable	NormalisedScore	Calm/Relaxed	NormalisedScore	ContactVetScore	ContactVetFlag	IsOldPet	Quality of Life	In Perfect Health	Affecting Quality of Life	Health Status Changed	PetId	Pet Name
11422	11422	5627	5627	Park Veterinary Centre	2018-03-25	37	160.714	1125	3	3.08219	3	0	6	0	6	0	1	5	0	6	0	6	0	6	0	5	3	0	0	4	0	0	3.51	44.3752	6	57.0796	5.62	41.9652	3.84	55.1801	0.1483	FALSE	FALSE	qol.transition_question.answer.good	qol.transition_question.answer.yes	None	None	5627	Zoetis Dog
11374	11374	7307	7307	Ards Veterinary Clinic	2018-03-19	5	22.4286	157	0	0.430137	6	0	6	0	6	0	2	6	0	5	0	6	0	6	0	5	6	0	0	6	0	0	4.03	55.5782	6	57.0796	6	59.0854	3.72	53.6039	0.6334	FALSE	FALSE	Very Good	Yes	None	None	7307	Zoetis Dog
11359	11359	7298	7298	Bridge Vets	2018-03-17	6	27.2857	191	0	0.523288	5	0	6	0	6	0	0	6	0	6	0	6	0	6	0	6	6	0	0	6	0	0	4.07	56.6157	6	57.0796	6	59.0854	4.26	61.1971	0.6528	FALSE	FALSE	Very Good	Yes	None	None	7298	Zoetis Dog
11360	11360	7299	7299	Kingdom Veterinary Clinic	2018-03-17	3	17	119	0	0.326027	6	0	5	0	5	0	0	6	0	6	0	6	0	6	0	5	6	0	0	6	0	0	3.98	54.5521	6	57.0796	6	59.0854	4.01	57.5887	0.614	FALSE	FALSE	Very Good	Yes	Not At All	None	7299	Zoetis Dog
11347	11347	7290	7290	Regent Court Vets	2018-03-16	38	165	1155	3	3.16438	6	0	6	0	5	0	0	6	0	6	0	5	0	6	0	6	6	0	0	6	0	0	3.99	54.7514	6	57.0796	6	59.0854	4.26	61.1971	0.6177	FALSE	FALSE	Very Good	Yes	None	None	7290	Zoetis Dog
11310	11310	6755	6755	Tweed House Veterinary Surgery	2018-03-12	13	57	399	1	1.09315	4	0	4	1	5	0	1	6	5	6	0	5	0	5	0	6	5	0	0	5	0	0	3.34	41.0407	5.4	34.3432	5.9	51.7692	4.26	61.1971	0.1846	FALSE	FALSE	Very Good	Yes	None	None	6755	Zoetis Dog
11314	11314	7271	7271	Myerscough Veterinary Group	2018-03-12	80	351.857	2463	6	6.74795	3	0	4	0	6	0	1	1	0	4	0	6	0	5	0	6	6	0	0	6	0	0	3.57	45.6223	6	57.0796	5.56	40.669	2.81	41.9187	0.1338	FALSE	FALSE	Very Good	Yes	Not At All	None	7271	Zoetis Dog
11301	11301	7269	7269	Eaton Veterinary Practice	2018-03-11	5	22.8571	160	0	0.438356	5	1	5	1	5	1	2	5	1	4	1	5	1	5	1	5	4	1	1	5	1	1	3.34	40.9046	5.33	33.1438	5.22	34.8921	3.26	47.5792	-0.3005	TRUE	FALSE	qol.transition_question.answer.very_good	qol.transition_question.answer.yes	qol.transition_question.answer.not_at_all	None	7269	Zoetis Dog
11294	11294	6921	6921	Regent Court Vets	2018-03-10	5	25.2857	177	0	0.484932	5	0	6	0	5	0	0	6	0	5	0	6	0	6	0	6	6	0	0	6	0	0	4	54.9012	6	57.0796	6	59.0854	3.97	56.9781	0.6206	FALSE	FALSE	qol.transition_question.answer.very_good	qol.transition_question.answer.yes	None	None	6921	Zoetis Dog
11282	11282	5486	5486	Taylor Veterinary Practice	2018-03-09	143	621.714	4352	11	11.9233	5	6	6	5	6	0	2	6	0	5	1	5	0	6	0	5	4	0	0	4	0	0	3.58	51.2109	5.54	44.343	5.04	37.8896	3.72	54.7338	-0.119	TRUE	TRUE	Very Good	Yes	None	None	5486	Zoetis Dog
11289	11289	7264	7264	Ashgrove Veterinary Centre Ltd	2018-03-09	42	184.714	1293	3	3.54247	6	1	6	0	6	0	0	6	0	0	0	6	0	6	0	0	6	0	0	6	0	0	4.15	58.4932	6	57.0796	5.89	51.3251	1.04	15.0628	0.6141	FALSE	FALSE	Very Good	Yes	None	None	7264	Zoetis Dog
11237	11237	7248	7248	Fareham Creek Veterinary Surgery	2018-03-03	42	186.286	1304	3	3.5726	5	0	6	0	6	0	3	6	0	4	0	5	0	6	0	6	6	0	0	6	0	0	3.79	50.4503	6	57.0796	6	59.0854	3.68	53.0262	0.5344	FALSE	FALSE	Very Good	Yes	None	None	7248	Zoetis Dog
11194	11194	5409	5409	Bicester Vets	2018-02-26	121	529.571	3707	10	10.1562	6	0	6	0	6	0	1	6	0	5	0	6	0	6	0	5	6	0	0	6	0	0	4.09	58.1541	6	60.4527	6	62.3168	3.72	54.7338	0.7099	FALSE	TRUE	Very Good	Yes	None	None	5409	Zoetis Dog
11196	11196	5622	5622	Market Cross Veterinary Clinic	2018-02-26	17	74.4286	521	1	1.4274	6	0	6	0	6	0	0	6	0	5	0	6	0	6	0	5	6	0	0	6	0	0	4.15	58.4932	6	57.0796	6	59.0854	3.72	53.6039	0.6874	FALSE	FALSE	Very Good	Yes	None	None	5622	Zoetis Dog
11172	11172	7212	7212	The Sevenoaks Veterinary Surgery	2018-02-24	26	116.571	816	2	2.23562	6	6	6	5	6	0	1	6	6	6	0	6	1	6	2	6	6	0	0	6	0	1	4.09	57.0238	4.54	23.6075	5.36	37.0405	4.26	61.1971	0.0015	FALSE	FALSE	qol.transition_question.answer.very_good	qol.transition_question.answer.yes	None	None	7212	Zoetis Dog
11174	11174	6174	6174	Tender Paws vets	2018-02-24	17	77.4286	542	1	1.48493	6	0	6	0	6	0	0	6	0	6	0	6	0	6	0	6	6	0	0	6	0	0	4.15	58.4932	6	57.0796	6	59.0854	4.26	61.1971	0.6874	FALSE	FALSE	Very Good	Yes	None	None	6174	Zoetis Dog
11178	11178	6870	6870	Midsummer Veterinary Centre	2018-02-24	8	35	245	0	0.671233	6	0	6	0	6	0	0	6	6	6	0	6	0	6	0	6	6	0	0	6	0	0	4.15	58.4932	5.39	34.1909	6	59.0854	4.26	61.1971	0.5957	FALSE	FALSE	Very Good	Yes	None	None	6870	Zoetis Dog
11180	11180	7214	7214	Minster Veterinary Centre	2018-02-24	111	483	3381	9	9.26301	5	2	4	3	5	2	3	3	1	5	1	5	0	6	1	5	6	0	3	5	1	0	3.45	49.5069	5.22	39.9245	4.98	37.3002	3.2	48.2528	-0.2137	TRUE	TRUE	Very Good	Yes	None	None	7214	Zoetis Dog
11143	11143	7200	7200	Minster Veterinary Centre	2018-02-21	6	29.5714	207	0	0.567123	5	0	5	0	6	0	0	6	5	5	0	6	0	6	0	5	5	0	0	5	0	0	3.84	51.3407	5.49	36.1078	5.9	51.7692	3.72	53.6039	0.408	FALSE	FALSE	Very Good	Yes	None	None	7200	Zoetis Dog
11071	11071	4668	4668	Grazely Vets	2018-02-14	129	563.857	3947	10	10.8137	5	0	5	0	6	0	1	6	0	6	0	6	0	6	0	6	5	0	0	5	0	0	3.77	53.7703	6	60.4527	5.9	55.564	4.26	62.0292	0.5031	FALSE	TRUE	Good	Yes	None	None	4668	Zoetis Dog
11066	11066	7164	7164	Mark Nelson Veterinary Surgery - Thornton Heath	2018-02-13	33	145.857	1021	2	2.79726	4	0	4	0	5	0	1	5	0	5	0	5	0	5	0	5	4	0	0	4	0	0	3.2	38.1951	6	57.0796	5.72	44.5171	3.55	51.3141	0.087	FALSE	FALSE	Good	Yes	A Little	None	7164	Zoetis Dog
11050	11050	7153	7153	The Sevenoaks Veterinary Surgery	2018-02-10	4	20	140	0	0.383562	6	0	6	0	6	0	3	6	0	6	0	6	0	6	0	6	6	0	0	6	0	0	3.96	54.1545	6	57.0796	6	59.0854	4.26	61.1971	0.6064	FALSE	FALSE	Very Good	Yes	None	None	7153	Zoetis Dog
11024	11024	7141	7141	Minster Veterinary Centre	2018-02-07	5	23.8571	167	0	0.457534	6	0	6	0	6	0	1	6	0	3	0	6	0	6	0	4	6	0	0	6	0	0	4.09	57.0238	6	57.0796	6	59.0854	2.9	42.9751	0.6604	FALSE	FALSE	Very Good	Yes	None	None	7141	Zoetis Dog
11032	11032	7146	7146	My Pets Vets Ltd	2018-02-07	48	208.714	1461	4	4.00274	6	6	6	2	6	0	3	6	1	1	1	4	0	6	2	6	4	0	0	6	0	0	3.67	47.7454	5.54	37.0665	5.04	32.6201	2.81	41.8763	-0.2509	TRUE	FALSE	Very Good	Yes	Not At All	None	7146	Zoetis Dog
11015	11015	6168	6168	Richmond Vets	2018-02-05	11	50.5714	354	0	0.969863	6	0	6	0	6	0	1	6	6	6	0	6	0	6	0	6	6	0	0	6	0	0	4.09	57.0238	5.39	34.1909	6	59.0854	4.26	61.1971	0.5687	FALSE	FALSE	Very Good	Yes	None	None	6168	Zoetis Dog
11001	11001	7129	7129	Stanley House Veterinary Surgeons	2018-02-03	61	265.286	1857	5	5.08767	6	0	6	0	6	0	0	6	0	6	0	6	0	6	0	6	6	0	0	6	0	0	4.15	58.4932	6	57.0796	6	59.0854	4.26	61.1971	0.6874	FALSE	FALSE	Very Good	Yes	None	None	7129	Zoetis Dog
10991	10991	7127	7127	DierenDokters Breda	2018-02-02	74	326	2282	6	6.25205	6	0	6	0	6	0	2	6	0	2	0	6	0	6	0	6	6	0	0	6	0	0	4.03	55.5782	6	57.0796	6	59.0854	3.1	45.548	0.6334	FALSE	FALSE	qol.transition_question.answer.very_good	qol.transition_question.answer.yes	None	None	7127	Zoetis Dog
10964	10964	7112	7112	Orange Grove Veterinary Hospital	2018-01-30	10	44.5714	312	0	0.854795	6	0	6	0	6	0	0	6	0	6	0	6	0	6	0	6	6	0	0	6	0	0	4.15	58.4932	6	57.0796	6	59.0854	4.26	61.1971	0.6874	FALSE	FALSE	Very Good	Yes	Not At All	None	7112	Zoetis Dog
10947	10947	6612	6612	Taylor Veterinary Practice	2018-01-29	15	68.5714	480	1	1.31507	6	0	6	0	6	0	0	6	0	6	0	6	0	6	0	6	6	0	0	6	0	0	4.15	58.4932	6	57.0796	6	59.0854	4.26	61.1971	0.6874	FALSE	FALSE	qol.transition_question.answer.very_good	qol.transition_question.answer.yes	None	None	6612	Zoetis Dog
10909	10909	5944	5944	Bakewell Veterinary Clinic	2018-01-22	25	109.429	766	2	2.09863	5	0	5	1	5	0	4	5	1	5	0	5	0	5	1	5	5	1	1	5	0	0	3.27	39.5473	5.54	37.0665	5.81	47.77	3.55	51.3141	0.1135	FALSE	FALSE	Very Good	Yes	None	None	5944	Zoetis Dog
10874	10874	2873	2873	Charter Vets Congleton	2018-01-18	41	179	1253	3	3.43288	5	0	5	0	5	0	0	5	1	5	0	5	0	5	0	5	5	0	0	5	0	0	3.59	46.0168	5.9	49.1249	5.81	47.77	3.55	51.3141	0.3018	FALSE	FALSE	Very Good	Yes	None	None	2873	Zoetis Dog
10876	10876	2865	2865	Donview Vet Centre	2018-01-18	31	136.714	957	2	2.62192	6	6	6	1	6	0	1	6	0	2	0	6	0	6	0	4	6	0	0	6	1	0	4.09	57.0238	5.91	49.6232	5.24	35.2402	2.61	39.2804	0.1243	FALSE	FALSE	Very Good	Yes	Somewhat	Better	2865	Zoetis Dog
10826	10826	7042	7042	Taylor Veterinary Practice	2018-01-13	9	39.8571	279	0	0.764384	4	0	6	0	5	0	0	6	0	3	0	6	0	5	0	5	5	0	0	6	0	0	3.77	49.9	6	57.0796	5.9	51.7692	3.14	46.097	0.4559	FALSE	FALSE	qol.transition_question.answer.good	qol.transition_question.answer.yes	qol.transition_question.answer.not_at_all	None	7042	Zoetis Dog
10813	10813	7035	7035	Millennium Veterinary Practice	2018-01-11	26	114.857	804	2	2.20274	6	0	6	0	6	0	1	6	0	5	0	6	0	6	0	5	6	0	0	6	0	0	4.09	57.0238	6	57.0796	6	59.0854	3.72	53.6039	0.6604	FALSE	FALSE	qol.transition_question.answer.very_good	qol.transition_question.answer.yes	qol.transition_question.answer.not_at_all	None	7035	Zoetis Dog
10808	10808	7032	7032	Taylor Veterinary Practice	2018-01-10	11	48.5714	340	0	0.931507	5	0	6	1	6	0	2	2	0	3	0	5	2	5	0	3	6	4	4	4	0	0	3.37	41.4947	4.98	28.2305	5.65	42.6886	1.96	30.5502	-0.0446	TRUE	FALSE	Very Good	Yes	Not At All	None	7032	Zoetis Dog
10792	10792	6611	6611	Knutsford Veterinary Surgery	2018-01-09	18	78.7143	551	1	1.50959	6	0	6	0	6	0	0	6	0	6	0	6	0	6	0	6	6	0	0	6	0	0	4.15	58.4932	6	57.0796	6	59.0854	4.26	61.1971	0.6874	FALSE	FALSE	Very Good	Yes	None	None	6611	Zoetis Dog
10798	10798	4605	4605	Wallace Veterinary Centre	2018-01-09	92	401.143	2808	7	7.69315	5	0	6	1	5	0	1	6	1	6	0	6	0	6	0	6	6	1	1	5	0	0	3.79	50.4023	5.63	39.1079	6	59.0854	4.26	61.1971	0.477	FALSE	FALSE	Good	Yes	None	None	4605	Zoetis Dog
10799	10799	7025	7025	Myerscough Veterinary Group	2018-01-09	14	63.8571	447	1	1.22466	6	0	6	1	5	0	1	5	1	5	0	6	1	6	0	5	5	0	0	6	0	0	3.95	53.9563	5.7	41.1831	5.81	47.77	3.55	51.3141	0.4294	FALSE	FALSE	Very Good	Yes	None	None	7025	Zoetis Dog
10786	10786	7012	7012	Fareham Creek Veterinary Surgery	2018-01-08	56	247.857	1735	4	4.75342	6	6	6	0	6	0	0	6	0	4	0	6	0	6	0	4	6	0	0	6	0	0	4.15	58.4932	6	57.0796	5.36	37.0405	3.19	46.6467	0.2478	FALSE	FALSE	Very Good	Yes	A Lot	None	7012	Zoetis Dog
10770	10770	6023	6023	Greenwood & Brown	2018-01-07	12	53.2857	373	1	1.02192	6	6	6	0	6	0	0	6	0	6	0	6	0	6	0	6	6	0	0	6	0	0	4.15	58.4932	6	57.0796	5.36	37.0405	4.26	61.1971	0.2478	FALSE	FALSE	Very Good	Yes	None	None	6023	Zoetis Dog
10771	10771	1581	1581	Parkside Veterinary Centre	2018-01-07	48	212.857	1490	4	4.08219	3	0	4	1	4	0	1	6	0	5	0	5	0	5	0	5	5	0	0	4	0	0	3.11	36.2409	5.91	49.6232	5.9	51.7692	3.72	53.6039	0.16	FALSE	FALSE	Very Good	Yes	None	None	1581	Zoetis Dog
10739	10739	1694	1694	Cedar Grove Veterinary Clinic	2018-01-04	36	160.143	1121	3	3.07123	6	5	6	0	5	0	3	6	0	3	0	5	0	6	0	6	4	3	3	4	0	3	3.34	40.8819	5.15	30.3999	5.27	35.6692	3.39	49.2421	-0.2908	TRUE	FALSE	qol.transition_question.answer.good	qol.transition_question.answer.yes	None	None	1694	Zoetis Dog
10723	10723	6982	6982	Mid Sussex Veterinary Clinic	2018-01-01	14	62.8571	440	1	1.20548	4	1	4	3	5	1	5	6	1	5	1	3	0	5	3	6	4	0	0	3	1	0	2.7	27.9086	5.36	33.6215	5.3	36.1615	3.97	56.9781	-0.5094	TRUE	FALSE	Very Good	Yes	None	None	6982	Zoetis Dog
10724	10724	6983	6983	Tender Paws vets	2018-01-01	4	18	126	0	0.345205	6	0	6	0	6	0	0	6	0	6	0	6	0	6	0	6	6	0	0	6	0	0	4.15	58.4932	6	57.0796	6	59.0854	4.26	61.1971	0.6874	FALSE	FALSE	Very Good	Yes	None	None	6983	Zoetis Dog
10713	10713	6614	6614	Heathside Veterinary Surgery	2017-12-31	95	413.429	2894	7	7.92877	3	2	3	3	4	1	2	5	2	2	1	4	0	4	1	3	4	3	3	3	0	0	2.45	22.8588	4.89	27.2083	5.23	35.0767	2.19	33.7484	-0.736	TRUE	FALSE	qol.transition_question.answer.very_good	qol.transition_question.answer.yes	None	None	6614	Zoetis Dog
10714	10714	2371	2371	Westport Vet Clinic	2017-12-31	34	150.286	1052	2	2.88219	6	0	6	0	6	0	0	6	0	6	0	6	0	0	0	6	6	0	0	6	0	0	3.63	47.0189	6	57.0796	6	59.0854	4.26	61.1971	0.4657	FALSE	FALSE	Very Good	Yes	None	None	2371	Zoetis Dog
10715	10715	4726	4726	Palmer & Duncan Vets Ltd	2017-12-31	29	128.143	897	2	2.45753	5	1	6	0	5	3	2	4	5	4	1	5	1	6	0	5	5	1	1	5	2	0	3.58	45.9239	5.21	31.2683	4.81	30.1495	3.09	45.3792	-0.4921	TRUE	FALSE	Very Good	Yes	None	None	4726	Zoetis Dog
10716	10716	5913	5913	Donview Vet Centre	2017-12-31	12	53.7143	376	1	1.03014	6	0	6	0	6	0	0	6	0	6	0	6	0	6	0	6	6	0	0	6	0	0	4.15	58.4932	6	57.0796	6	59.0854	4.26	61.1971	0.6874	FALSE	FALSE	Very Good	Yes	None	None	5913	Zoetis Dog
10705	10705	1595	1595	Barton Lodge Veterinary Centre	2017-12-29	48	210	1470	4	4.0274	6	0	6	0	6	0	0	6	0	6	0	6	0	6	0	6	0	0	0	6	0	0	3.79	50.4263	6	57.0796	5.41	37.8657	4.26	61.1971	0.1286	FALSE	FALSE	Very Good	Yes	None	None	1595	Zoetis Dog
10693	10693	6972	6972	Orange Grove Veterinary Hospital	2017-12-27	12	53.1429	372	1	1.01918	6	1	6	1	4	1	0	5	2	4	1	5	0	6	1	5	5	1	1	6	1	1	3.79	50.4263	5.33	33.1908	5.31	36.3127	3.26	47.5792	-0.0383	TRUE	FALSE	Very Good	Yes	Not At All	None	6972	Zoetis Dog
10676	10676	5106	5106	Nardini Rudder Veterinary Centre	2017-12-22	25	111	777	2	2.12877	6	0	6	0	6	0	3	6	0	6	0	6	0	6	0	5	5	0	0	6	0	0	3.9	52.8241	6	57.0796	5.9	51.7692	4.01	57.5887	0.5132	FALSE	FALSE	Very Good	Yes	None	None	5106	Zoetis Dog
10670	10670	6964	6964	Regent Court Vets	2017-12-21	18	81.5714	571	1	1.56438	6	0	6	0	6	0	0	6	0	6	0	6	0	6	0	6	6	0	0	6	0	0	4.15	58.4932	6	57.0796	6	59.0854	4.26	61.1971	0.6874	FALSE	FALSE	qol.transition_question.answer.very_good	qol.transition_question.answer.yes	None	None	6964	Zoetis Dog
10647	10647	3397	3397	Myerscough Veterinary Group	2017-12-18	40	177.571	1243	3	3.40548	5	0	5	0	6	0	1	6	0	5	0	6	0	6	0	5	5	0	0	4	0	0	3.69	48.2632	6	57.0796	5.9	51.7692	3.72	53.6039	0.4232	FALSE	FALSE	Very Good	Yes	Not At All	Unchanged	3397	Zoetis Dog
10636	10636	4088	4088	Foxgrove Veterinary Centre	2017-12-15	28	122.571	858	2	2.35068	6	0	5	0	6	0	0	6	0	6	0	6	0	6	0	6	6	0	0	6	0	0	4.06	56.2601	6	57.0796	6	59.0854	4.26	61.1971	0.6462	FALSE	FALSE	Very Good	Yes	None	None	4088	Zoetis Dog
10615	10615	6945	6945	Regent Court Vets	2017-12-11	48	210.571	1474	4	4.03836	3	0	3	4	5	0	6	6	0	6	0	4	0	6	0	6	6	0	0	6	0	0	2.99	33.8429	5.63	39.1805	6	59.0854	4.26	61.1971	0.1349	FALSE	FALSE	Very Good	Yes	None	None	6945	Zoetis Dog
10603	10603	6940	6940	Kingdom Veterinary Clinic	2017-12-10	67	292.286	2046	5	5.60548	5	0	5	0	6	0	2	6	0	6	0	6	0	6	0	6	6	0	0	6	0	0	3.85	51.631	6	57.0796	6	59.0854	4.26	61.1971	0.5576	FALSE	FALSE	Very Good	Yes	Not At All	None	6940	Zoetis Dog
10604	10604	6545	6545	Nethan Valley Veterinary Centre	2017-12-10	5	22	154	0	0.421918	5	0	6	0	6	0	0	6	0	6	0	6	0	6	0	6	6	0	0	6	0	6	4.07	56.6157	5.37	33.891	6	59.0854	4.26	61.1971	0.5586	FALSE	FALSE	Very Good	Yes	A Lot	Unchanged	6545	Zoetis Dog
10582	10582	6130	6130	Parkside Veterinary Centre	2017-12-07	22	98	686	1	1.87945	4	0	5	3	5	0	3	6	4	5	0	5	0	6	0	6	3	3	1	5	0	0	3.1	36.039	4.98	28.2651	5.7	44.2315	3.97	56.9781	-0.1188	TRUE	FALSE	Good	Yes	None	None	6130	Zoetis Dog
10588	10588	6933	6933	Abbey Veterinary Group LTD	2017-12-07	127	552.714	3869	10	10.6	5	5	4	4	4	0	4	4	0	0	0	6	0	4	1	4	4	1	1	5	1	1	3.04	44.3849	5.26	40.3197	4.97	37.2128	1.68	28.645	-0.4055	TRUE	TRUE	Very Good	Yes	Somewhat	None	6933	Zoetis Dog
10546	10546	2005	2005	Arden House Animal Hospital	2017-12-03	58	255.429	1788	4	4.89863	6	0	6	0	6	0	0	6	0	5	0	6	0	6	0	6	6	0	0	6	0	0	4.15	58.4932	6	57.0796	6	59.0854	3.97	56.9781	0.6874	FALSE	FALSE	qol.transition_question.answer.very_good	qol.transition_question.answer.yes	None	None	2005	Zoetis Dog
10555	10555	6920	6920	Wingrave Veterinary Surgery, Chipstead	2017-12-03	128	558.714	3911	10	10.7151	6	0	0	0	6	0	0	6	0	6	0	6	0	6	0	6	6	0	0	6	0	0	3.57	51.1532	6	60.4527	6	62.3168	4.26	62.0292	0.4721	FALSE	TRUE	Very Good	Yes	Not At All	None	6920	Zoetis Dog
10524	10524	5661	5661	Avenues Veterinary Clinic	2017-11-30	95	413.143	2892	7	7.92329	4	0	4	3	4	0	2	6	0	3	0	4	0	5	0	4	5	1	0	2	0	0	2.82	30.3661	5.64	39.587	5.9	51.7692	2.9	42.9751	-0.0037	TRUE	FALSE	qol.transition_question.answer.good	qol.transition_question.answer.yes	None	None	5661	Zoetis Dog
10511	10511	6527	6527	Kingdom Veterinary Clinic	2017-11-29	23	102.286	716	1	1.96164	4	2	4	2	4	1	2	2	4	4	1	4	0	4	2	4	4	1	1	4	1	0	2.83	30.6358	5.05	29.1702	4.84	30.4763	2.49	37.8158	-0.8139	TRUE	FALSE	qol.transition_question.answer.good	qol.transition_question.answer.yes	None	None	6527	Zoetis Dog
10515	10515	3221	3221	Brookend Veterinary Practice	2017-11-29	28	122.286	856	2	2.34521	6	0	6	0	6	0	0	6	0	6	0	6	0	6	0	6	6	0	0	6	0	0	4.15	58.4932	6	57.0796	6	59.0854	4.26	61.1971	0.6874	FALSE	FALSE	Very Good	Yes	None	None	3221	Zoetis Dog
10518	10518	6904	6904	Milan Veterinary Practice	2017-11-29	30	134.714	943	2	2.58356	6	0	6	0	6	0	0	6	0	6	0	6	0	6	0	6	6	0	0	6	0	0	4.15	58.4932	6	57.0796	6	59.0854	4.26	61.1971	0.6874	FALSE	FALSE	Very Good	Yes	Not At All	None	6904	Zoetis Dog
10501	10501	6502	6502	Donview Vet Centre	2017-11-28	5	23.8571	167	0	0.457534	5	0	6	0	6	0	0	6	0	5	0	6	0	6	0	6	6	0	0	6	0	0	4.07	56.6157	6	57.0796	6	59.0854	3.97	56.9781	0.6528	FALSE	FALSE	Very Good	Yes	None	None	6502	Zoetis Dog
10502	10502	6894	6894	0	2017-11-28	14	65.1429	456	1	1.24932	6	0	6	0	6	0	0	6	0	4	0	6	0	6	6	6	6	0	0	6	6	0	4.15	58.4932	5.48	35.7931	5.28	35.8151	3.68	53.0262	0.1141	FALSE	FALSE	Very Good	Yes	Not At All	None	6894	Zoetis Dog
10468	10468	6879	6879	0	2017-11-25	14	61.2857	429	1	1.17534	4	0	6	0	6	0	1	6	0	3	0	5	0	6	0	3	5	1	0	5	0	1	3.64	47.1358	5.82	45.2657	5.9	51.7692	2.65	39.8365	0.3732	FALSE	FALSE	Good	Yes	Somewhat	None	6879	Zoetis Dog
10435	10435	6854	6854	The Forest Vet	2017-11-22	32	141.429	990	2	2.71233	5	0	5	0	6	0	6	6	0	6	0	6	0	6	0	6	6	0	0	6	0	0	3.6	46.226	6	57.0796	6	59.0854	4.26	61.1971	0.4496	FALSE	FALSE	Very Good	Yes	Not At All	None	6854	Zoetis Dog
10429	10429	6850	6850	Regent Court Vets	2017-11-20	38	166.286	1164	3	3.18904	6	6	6	0	6	0	3	6	6	6	0	6	0	6	0	6	6	0	0	6	0	0	3.96	54.1545	5.39	34.1909	5.36	37.0405	4.26	61.1971	0.0751	FALSE	FALSE	Very Good	Yes	None	None	6850	Zoetis Dog
10392	10392	5439	5439	Withy Grove Veterinary Clinic	2017-11-17	57	250	1750	4	4.79452	4	0	6	1	5	0	1	6	1	4	0	5	0	5	0	5	6	1	0	5	0	0	3.54	44.9977	5.73	42.0174	6	59.0854	3.43	49.8001	0.3836	FALSE	FALSE	Very Good	Yes	Not At All	Unchanged	5439	Zoetis Dog
10332	10332	6444	6444	Bryanpark Veterinary Clinic	2017-11-12	118	514.714	3603	9	9.87123	2	4	2	3	4	5	5	3	4	3	3	2	5	2	2	3	1	2	4	1	5	3	1.45	22.6146	3.74	28.198	3.1	23.3607	2.13	34.9134	-2.2865	TRUE	TRUE	Good	Yes	A Little	Better	6444	Zoetis Dog
10304	10304	5624	5624	Ashgrove Veterinary Centre Ltd	2017-11-09	12	52.4286	367	1	1.00548	5	0	5	0	6	0	0	6	0	5	0	5	0	5	0	6	5	0	0	5	0	0	3.66	47.6045	6	57.0796	5.9	51.7692	3.97	56.9781	0.41	FALSE	FALSE	Very Good	Yes	None	None	5624	Zoetis Dog
10279	10279	6088	6088	Stanley House Veterinary Surgeons	2017-11-05	15	67.2857	471	1	1.29041	6	0	6	6	6	0	2	6	0	6	0	6	0	6	0	6	6	0	0	6	0	0	4.03	55.5782	5.44	35.1302	6	59.0854	4.26	61.1971	0.5495	FALSE	FALSE	Very Good	Yes	A Lot	Unchanged	6088	Zoetis Dog
10271	10271	6037	6037	Croft Veterinary Centre	2017-11-04	10	44.7143	313	0	0.857534	5	0	6	0	6	0	1	6	0	5	0	6	0	5	0	3	5	0	0	6	1	1	3.86	51.922	5.9	48.9634	5.78	46.6204	3.23	47.1974	0.3976	FALSE	FALSE	Very Good	Yes	Not At All	Unchanged	6037	Zoetis Dog
10258	10258	4933	4933	0	2017-11-01	33	147.143	1030	2	2.82192	6	0	6	0	6	0	0	6	0	6	0	6	0	6	0	6	6	0	0	6	0	0	4.15	58.4932	6	57.0796	6	59.0854	4.26	61.1971	0.6874	FALSE	FALSE	Very Good	Yes	Not At All	Unchanged	4933	Zoetis Dog
10228	10228	6421	6421	Milan Veterinary Practice	2017-10-29	9	42.7143	299	0	0.819178	6	0	6	0	6	0	0	6	0	6	0	6	0	6	0	6	0	0	0	6	0	0	3.79	50.4263	6	57.0796	5.41	37.8657	4.26	61.1971	0.1286	FALSE	FALSE	Very Good	Yes	A Lot	Unchanged	6421	Zoetis Dog
10205	10205	6733	6733	Milan Veterinary Practice	2017-10-25	60	261.714	1832	5	5.01918	3	0	4	1	6	0	1	4	0	6	0	4	0	6	0	6	6	0	0	4	0	0	3.32	40.4968	5.91	49.6232	5.82	48.1582	3.91	56.1884	0.1958	FALSE	FALSE	Very Good	Yes	None	None	6733	Zoetis Dog
10197	10197	6082	6082	ICR Butt & Partners	2017-10-24	52	229.429	1606	4	4.4	4	0	4	4	4	0	2	6	6	4	0	6	6	5	0	5	5	0	0	5	0	0	3.29	39.9991	4.39	22.222	5.9	51.7692	3.43	49.8001	0.0113	FALSE	FALSE	Very Good	Yes	Not At All	Unchanged	6082	Zoetis Dog
10179	10179	5346	5346	Kingdom Veterinary Clinic	2017-10-22	39	172.429	1207	3	3.30685	6	6	6	0	6	0	0	6	1	5	0	5	0	5	0	5	6	0	0	6	0	0	3.98	54.5023	5.9	49.1249	5.36	37.0405	3.72	53.6039	0.1581	FALSE	FALSE	Very Good	Yes	A Lot	Unchanged	5346	Zoetis Dog
10144	10144	4326	4326	Parkside Veterinary Centre	2017-10-19	147	639.429	4476	12	12.263	3	1	5	1	6	1	3	5	0	5	1	5	1	6	0	6	5	0	1	5	1	0	3.4	48.8685	5.7	47.6622	5.31	41.2978	3.8	55.6821	-0.0325	TRUE	TRUE	Very Good	Yes	None	None	4326	Zoetis Dog
10137	10137	6700	6700	Dinas Vets	2017-10-18	78	342.429	2397	6	6.56712	4	0	3	2	5	0	3	6	1	1	0	6	0	6	1	6	6	2	1	5	0	0	3.23	38.7805	5.37	33.7924	6	59.0854	2.81	41.8763	0.2	FALSE	FALSE	Very Good	Yes	Not At All	None	6700	Zoetis Dog
10110	10110	6689	6689	Cedar Grove Veterinary Clinic	2017-10-14	14	63.2857	443	1	1.2137	6	0	6	0	6	0	0	6	0	6	0	6	0	6	0	6	6	0	0	6	0	0	4.15	58.4932	6	57.0796	6	59.0854	4.26	61.1971	0.6874	FALSE	FALSE	Very Good	Yes	Not At All	None	6689	Zoetis Dog
10111	10111	5697	5697	Cedar Grove Veterinary Clinic	2017-10-14	20	87.7143	614	1	1.68219	6	0	6	0	6	0	0	6	0	6	0	6	0	6	0	6	6	0	0	6	0	0	4.15	58.4932	6	57.0796	6	59.0854	4.26	61.1971	0.6874	FALSE	FALSE	Very Good	Yes	Not At All	Unchanged	5697	Zoetis Dog
10101	10101	6685	6685	Milan Veterinary Practice	2017-10-12	27	119	833	2	2.28219	5	0	5	1	6	1	1	6	0	6	0	6	0	6	0	6	5	0	0	5	0	0	3.77	49.9716	5.91	49.6232	5.76	45.7335	4.26	61.1971	0.3426	FALSE	FALSE	Very Good	Yes	A Lot	None	6685	Zoetis Dog
10092	10092	5675	5675	Abbey Veterinary Group LTD	2017-10-10	13	59.5714	417	1	1.14247	6	5	6	1	6	0	2	6	4	0	0	5	3	5	0	1	6	4	4	6	0	0	3.61	46.4821	4.47	22.8979	5.47	38.8668	1.29	19.883	-0.1423	TRUE	FALSE	Good	Yes	None	None	5675	Zoetis Dog
10078	10078	3671	3671	Kingdom Veterinary Clinic	2017-10-08	27	118.571	830	2	2.27397	6	0	6	0	6	0	0	6	0	6	0	6	0	6	0	6	6	0	0	6	0	0	4.15	58.4932	6	57.0796	6	59.0854	4.26	61.1971	0.6874	FALSE	FALSE	Very Good	Yes	None	None	3671	Zoetis Dog
10026	10026	6642	6642	Market Cross Veterinary Clinic	2017-10-01	46	202.857	1420	3	3.89041	3	0	5	0	6	0	0	6	6	5	0	5	0	6	0	1	5	0	0	6	0	0	3.67	47.6984	5.39	34.1909	5.9	51.7692	2.74	40.9437	0.3202	FALSE	FALSE	Very Good	Yes	None	None	6642	Zoetis Dog
10027	10027	6643	6643	Milan Veterinary Practice	2017-10-01	28	124.143	869	2	2.38082	4	0	4	0	5	0	1	6	0	0	0	5	0	6	0	5	6	0	0	5	0	0	3.49	44.0532	6	57.0796	6	59.0854	2.27	34.9168	0.405	FALSE	FALSE	Very Good	Yes	None	None	6643	Zoetis Dog
10018	10018	6640	6640	My Pets Vets Ltd	2017-09-29	12	53.5714	375	1	1.0274	6	6	6	0	6	0	0	6	0	4	0	6	0	6	0	4	4	0	0	6	0	0	4.03	55.7293	6	57.0796	5.16	34.198	3.19	46.6467	0.0615	FALSE	FALSE	Very Good	Yes	Not At All	None	6640	Zoetis Dog
10000	10000	6343	6343	Bakewell Veterinary Clinic	2017-09-27	7	31.7143	222	0	0.608219	5	0	6	0	6	0	0	6	0	0	6	6	0	6	0	6	0	0	0	6	0	0	3.71	48.6883	6	57.0796	4.65	28.5664	2.52	38.1619	-0.4281	TRUE	FALSE	Very Good	Yes	Not At All	Unchanged	6343	Zoetis Dog
9959	9959	5642	5642	Knutsford Veterinary Surgery	2017-09-21	49	215.143	1506	4	4.12603	6	0	6	0	6	0	0	6	0	6	0	6	0	6	0	6	6	0	0	6	0	0	4.15	58.4932	6	57.0796	6	59.0854	4.26	61.1971	0.6874	FALSE	FALSE	Very Good	Yes	None	None	5642	Zoetis Dog
9902	9902	6576	6576	Kingdom Veterinary Clinic	2017-09-13	14	64.2857	450	1	1.23288	4	0	4	1	5	0	0	6	6	4	0	6	0	6	0	5	5	0	0	5	0	0	3.58	45.9471	5.3	32.6355	5.9	51.7692	3.43	49.8001	0.2707	FALSE	FALSE	Poor	Yes	Not At All	None	6576	Zoetis Dog
9897	9897	6572	6572	Taylor Veterinary Practice	2017-09-12	77	337.714	2364	6	6.47671	5	0	6	0	6	0	1	6	0	5	0	6	0	6	0	5	6	0	0	6	0	0	4.01	55.1765	6	57.0796	6	59.0854	3.72	53.6039	0.6258	FALSE	FALSE	Very Good	Yes	None	None	6572	Zoetis Dog
9898	9898	6573	6573	Taylor Veterinary Practice	2017-09-12	92	401.143	2808	7	7.69315	6	1	6	0	6	0	1	6	0	5	0	6	0	6	0	5	6	0	0	6	0	0	4.09	57.0238	6	57.0796	5.89	51.3251	3.72	53.6039	0.5871	FALSE	FALSE	Very Good	Yes	None	None	6573	Zoetis Dog
9899	9899	6574	6574	Taylor Veterinary Practice	2017-09-12	48	212.571	1488	4	4.07671	5	0	5	0	6	0	2	6	6	5	0	6	0	6	0	4	6	0	0	6	0	0	3.85	51.631	5.39	34.1909	6	59.0854	3.48	50.3603	0.4659	FALSE	FALSE	Very Good	Yes	None	None	6574	Zoetis Dog
9839	9839	6176	6176	Ards Veterinary Clinic	2017-09-03	18	79.8571	559	1	1.53151	3	0	6	3	6	0	4	6	0	6	0	6	0	6	1	6	6	0	0	3	0	0	3.42	42.5192	5.63	39.3268	6	59.0854	4.26	61.1971	0.3182	FALSE	FALSE	Good	Yes	A Lot	Unchanged	6176	Zoetis Dog
9822	9822	6538	6538	Waterkloof Glen Animal Hospital	2017-09-01	103	451.857	3163	8	8.66575	5	0	5	1	6	0	1	6	0	4	0	5	0	6	0	5	6	1	1	5	0	0	3.68	52.5911	5.73	48.3293	6	62.3168	3.43	51.0792	0.5227	FALSE	TRUE	Very Good	Yes	Not At All	None	6538	Zoetis Dog
9823	9823	6539	6539	Waterkloof Glen Animal Hospital	2017-09-01	103	451.857	3163	8	8.66575	6	0	6	0	5	0	1	6	0	4	0	6	0	6	0	4	5	0	0	6	0	0	3.95	56.2473	6	60.4527	5.9	55.564	3.19	48.0494	0.5869	FALSE	TRUE	Very Good	Yes	A Lot	None	6539	Zoetis Dog
9803	9803	3107	3107	Anne Nelson Vets	2017-08-27	96	417.857	2925	8	8.0137	5	0	5	1	6	1	1	5	0	5	0	6	0	5	0	5	2	0	0	5	0	0	3.51	50.2771	5.91	54.4691	5.37	42.1432	3.55	52.5338	0.0541	FALSE	TRUE	Very Good	Yes	None	None	3107	Zoetis Dog
9769	9769	6197	6197	Greenwood & Brown	2017-08-22	7	33.5714	235	0	0.643836	6	0	5	1	6	0	2	6	0	4	0	6	0	6	0	5	5	0	0	6	0	0	3.87	52.0921	5.91	49.6232	5.9	51.7692	3.43	49.8001	0.485	FALSE	FALSE	Very Good	Yes	Not At All	Unchanged	6197	Zoetis Dog
9761	9761	6510	6510	Avonvale Veterinary Centre - Warwick	2017-08-20	85	371.429	2600	7	7.12329	6	0	6	0	6	0	0	6	0	6	0	6	0	6	0	6	6	0	0	6	0	0	4.15	58.4932	6	57.0796	6	59.0854	4.26	61.1971	0.6874	FALSE	FALSE	Very Good	Yes	None	None	6510	Zoetis Dog
9736	9736	6226	6226	Taylor Veterinary Practice	2017-08-15	30	130.714	915	2	2.50685	4	0	5	0	6	0	4	6	0	4	0	5	0	6	0	6	6	0	0	5	0	0	3.47	43.6858	6	57.0796	6	59.0854	3.68	53.0262	0.3974	FALSE	FALSE	Very Good	Yes	None	None	6226	Zoetis Dog
9740	9740	6497	6497	Taylor Veterinary Practice	2017-08-15	79	345.429	2418	6	6.62466	4	0	2	2	5	0	0	6	0	6	0	4	4	3	1	6	6	0	0	3	0	0	2.85	31.1075	5.31	32.8183	6	59.0854	4.26	61.1971	0.0291	FALSE	FALSE	Very Good	Yes	Not At All	None	6497	Zoetis Dog
9726	9726	6492	6492	Orange Grove Veterinary Hospital	2017-08-14	51	222.571	1558	4	4.26849	6	1	6	0	4	1	1	1	1	4	0	5	2	6	1	6	6	1	1	5	1	0	3.71	48.641	5.42	34.7575	5.18	34.4851	2.81	41.9187	-0.1484	TRUE	FALSE	Very Good	Yes	A Lot	None	6492	Zoetis Dog
9639	9639	6451	6451	Moreleta Ridge Animal Clinic	2017-07-28	57	250.857	1756	4	4.81096	6	0	6	0	6	0	2	6	0	3	0	6	0	6	0	6	5	0	0	5	0	0	3.89	52.4575	6	57.0796	5.9	51.7692	3.39	49.2421	0.5061	FALSE	FALSE	Very Good	Yes	Not At All	None	6451	Zoetis Dog
9636	9636	6449	6449	0	2017-07-27	42	184.571	1292	3	3.53973	5	0	5	0	6	0	1	6	0	4	0	5	0	6	0	4	6	0	0	6	0	0	3.82	51.0994	6	57.0796	6	59.0854	3.19	46.6467	0.5472	FALSE	FALSE	Very Good	Yes	A Lot	None	6449	Zoetis Dog
9593	9593	4314	4314	Donview Vet Centre	2017-07-22	22	96.7143	677	1	1.85479	6	0	6	0	6	0	0	6	0	6	0	6	0	6	0	6	6	0	0	6	0	0	4.15	58.4932	6	57.0796	6	59.0854	4.26	61.1971	0.6874	FALSE	FALSE	Very Good	Yes	None	None	4314	Zoetis Dog
9594	9594	6427	6427	Deane Vets	2017-07-22	3	16.1429	113	0	0.309589	6	0	6	0	6	0	0	6	0	0	0	6	0	6	0	6	6	0	0	6	0	0	4.15	58.4932	6	57.0796	6	59.0854	2.52	38.1619	0.6874	FALSE	FALSE	Very Good	Yes	Not At All	None	6427	Zoetis Dog
9597	9597	4642	4642	Cedar Grove Veterinary Clinic	2017-07-22	85	372.571	2608	7	7.14521	6	0	6	0	6	0	0	6	0	6	0	6	0	6	0	6	6	0	0	6	0	0	4.15	58.4932	6	57.0796	6	59.0854	4.26	61.1971	0.6874	FALSE	FALSE	Very Good	Yes	None	None	4642	Zoetis Dog
9598	9598	4643	4643	Cedar Grove Veterinary Clinic	2017-07-22	73	320.429	2243	6	6.14521	6	0	6	0	6	0	0	6	0	6	0	6	0	6	0	6	6	0	0	6	0	0	4.15	58.4932	6	57.0796	6	59.0854	4.26	61.1971	0.6874	FALSE	FALSE	Very Good	Yes	None	None	4643	Zoetis Dog
9510	9510	6387	6387	Bicester Vets	2017-07-04	96	419.286	2935	8	8.0411	3	1	3	2	5	1	1	5	1	6	1	3	0	3	2	6	2	0	0	2	1	0	2.4	36.2382	5.54	44.3927	5.02	37.6905	4.09	59.5692	-0.6733	TRUE	TRUE	Good	Yes	Not At All	None	6387	Zoetis Dog
9465	9465	4579	4579	Strathmore Vets	2017-06-29	17	74.1429	519	1	1.42192	6	0	6	0	6	0	0	6	0	6	0	6	0	6	0	6	6	0	0	6	0	0	4.15	58.4932	6	57.0796	6	59.0854	4.26	61.1971	0.6874	FALSE	FALSE	Very Good	Yes	None	None	4579	Zoetis Dog
9425	9425	6115	6115	Robert Young Veterinary Surgeon	2017-06-22	14	64.4286	451	1	1.23562	6	6	6	0	6	0	0	6	0	3	0	6	0	6	0	6	6	0	0	6	0	0	4.15	58.4932	6	57.0796	5.36	37.0405	3.39	49.2421	0.2478	FALSE	FALSE	Very Good	Yes	None	None	6115	Zoetis Dog
9424	9424	6341	6341	Millennium Veterinary Practice	2017-06-21	6	28.1429	197	0	0.539726	4	0	3	0	6	0	0	6	0	6	0	6	0	6	0	6	5	0	0	6	0	0	3.64	47.1826	6	57.0796	5.9	51.7692	4.26	61.1971	0.4014	FALSE	FALSE	Very Good	Yes	None	None	6341	Zoetis Dog
9392	9392	6324	6324	Ards Veterinary Clinic	2017-06-16	7	33.2857	233	0	0.638356	5	1	5	0	5	0	3	5	0	5	0	5	0	5	0	6	3	0	0	6	0	0	3.36	41.2676	6	57.0796	5.51	39.6874	3.8	54.5909	0.0106	FALSE	FALSE	Very Good	Yes	Not At All	None	6324	Zoetis Dog
9358	9358	6307	6307	Centurion Animal Clinic	2017-06-12	37	162.286	1136	3	3.11233	6	0	6	0	6	0	0	6	0	4	0	6	0	6	0	5	5	0	0	6	0	0	4.09	57.1005	6	57.0796	5.9	51.7692	3.43	49.8001	0.5943	FALSE	FALSE	Very Good	Yes	Not At All	None	6307	Zoetis Dog
9360	9360	5474	5474	Mid Sussex Veterinary Clinic	2017-06-12	71	310.429	2173	5	5.95342	4	1	4	3	4	0	2	1	1	2	0	2	0	4	2	4	6	2	2	4	1	1	2.71	28.2704	4.98	28.2651	5.33	36.594	1.74	27.3683	-0.5391	TRUE	FALSE	Very Good	Yes	None	None	5474	Zoetis Dog
9300	9300	6280	6280	University of Bristol Canine Osteoarthritis Resear	2017-06-01	120	521.857	3653	10	10.0082	0	0	0	6	6	3	3	6	0	6	6	6	0	6	4	6	0	0	0	0	0	0	2.06	31.6733	5.09	38.4722	4.21	30.659	4.26	62.0292	-1.328	TRUE	TRUE	Very Good	Yes	None	None	6280	Zoetis Dog
9301	9301	6281	6281	University of Bristol Canine Osteoarthritis Resear	2017-06-01	120	521.857	3653	10	10.0082	3	1	1	6	6	6	3	1	0	6	6	6	1	4	4	6	1	1	1	3	1	1	2.46	37.0742	4.71	34.8717	3.2	23.9629	3.39	50.5842	-1.7631	TRUE	TRUE	Good	Yes	None	None	6281	Zoetis Dog
9262	9262	5565	5565	Pennine Vets	2017-05-28	7	34.1429	239	0	0.654795	6	0	6	0	6	0	0	6	0	3	0	6	0	6	0	6	6	0	0	6	0	0	4.15	58.4932	6	57.0796	6	59.0854	3.39	49.2421	0.6874	FALSE	FALSE	Very Good	Yes	A Lot	Better	5565	Zoetis Dog
9263	9263	5450	5450	Pennine Vets	2017-05-28	10	46.8571	328	0	0.89863	6	3	6	0	6	3	0	3	0	6	3	6	0	6	0	6	6	0	0	6	3	0	4.15	58.4932	6	57.0796	4.24	24.9855	3.74	53.8272	-0.525	TRUE	FALSE	Very Good	Yes	Somewhat	Unchanged	5450	Zoetis Dog
9234	9234	6256	6256	University of Bristol Canine Osteoarthritis Resear	2017-05-23	132	574	4018	11	11.0082	5	1	5	1	5	2	3	4	1	5	1	5	0	5	0	5	5	1	0	5	0	0	3.33	48.0917	5.73	48.3657	5.2	39.7767	3.38	50.3785	-0.1314	TRUE	TRUE	Good	Yes	None	None	6256	Zoetis Dog
9194	9194	6240	6240	Willows Veterinary Centre Ltd.	2017-05-18	38	168.286	1178	3	3.2274	4	1	5	1	6	0	1	6	0	5	0	6	0	6	0	6	6	0	0	6	0	0	3.83	51.2441	5.91	49.6232	5.89	51.3251	3.97	56.9781	0.4627	FALSE	FALSE	Very Good	Yes	None	None	6240	Zoetis Dog
9191	9191	6237	6237	Charter Vets Congleton	2017-05-17	82	356.857	2498	6	6.84384	2	5	4	2	4	1	3	4	4	4	2	4	1	5	2	6	4	2	2	4	2	2	2.63	26.571	4.56	23.7712	4.45	26.7978	3.33	48.5154	-1.2413	TRUE	FALSE	Very Good	Yes	None	None	6237	Zoetis Dog
9179	9179	6233	6233	Taylor Veterinary Practice	2017-05-16	35	152.143	1065	2	2.91781	6	3	6	1	6	1	0	6	0	4	0	6	0	6	0	6	6	0	0	6	0	0	4.15	58.4932	5.91	49.6232	5.53	40.1519	3.68	53.0262	0.3528	FALSE	FALSE	Very Good	Yes	None	None	6233	Zoetis Dog
9155	9155	5239	5239	Taylor Veterinary Practice	2017-05-13	9	43.2857	303	0	0.830137	4	1	5	1	6	0	1	6	0	5	0	6	0	6	0	6	5	0	0	5	0	0	3.69	48.2396	5.91	49.6232	5.8	47.0906	3.97	56.9781	0.3355	FALSE	FALSE	Very Good	Yes	None	None	5239	Zoetis Dog
9146	9146	6215	6215	Millennium Veterinary Practice	2017-05-12	6	27.1429	190	0	0.520548	6	0	6	0	6	0	0	6	0	6	0	6	0	6	0	6	6	0	0	6	0	0	4.15	58.4932	6	57.0796	6	59.0854	4.26	61.1971	0.6874	FALSE	FALSE	Very Good	Yes	Not At All	None	6215	Zoetis Dog
9149	9149	4743	4743	Bush House Vets	2017-05-12	12	55.5714	389	1	1.06575	6	0	6	0	6	0	1	6	6	3	0	6	0	6	0	6	6	0	0	6	0	0	4.09	57.0238	5.39	34.1909	6	59.0854	3.39	49.2421	0.5687	FALSE	FALSE	Very Good	Yes	None	None	4743	Zoetis Dog
9151	9151	4913	4913	Condorrat Veterinary Surgery	2017-05-12	9	40.4286	283	0	0.775342	3	3	3	3	3	3	3	3	3	3	3	3	3	3	3	3	3	3	3	3	3	3	2.08	14.8681	3.99	18.8166	3.94	22.7174	2.13	32.9745	-1.9159	TRUE	FALSE	Good	Yes	None	None	4913	Zoetis Dog
9131	9131	4710	4710	Milan Veterinary Practice	2017-05-09	80	348	2436	6	6.67397	4	6	5	1	1	1	1	6	6	6	0	6	0	5	0	6	6	0	0	6	0	0	3.37	41.4947	5.3	32.6355	5.21	34.8692	4.26	61.1971	-0.2941	TRUE	FALSE	Very Good	Yes	Somewhat	Better	4710	Zoetis Dog
9121	9121	6195	6195	Croft Veterinary Centre	2017-05-08	89	388.286	2718	7	7.44658	6	0	6	0	6	0	0	6	0	6	0	6	0	6	0	6	6	0	0	6	0	0	4.15	59.0676	6	60.4527	6	62.3168	4.26	62.0292	0.739	FALSE	TRUE	Very Good	Yes	Not At All	None	6195	Zoetis Dog
9111	9111	6194	6194	Taylor Veterinary Practice	2017-05-07	5	24.7143	173	0	0.473973	6	0	6	0	6	0	0	6	0	6	0	6	0	6	0	6	6	0	0	6	0	0	4.15	58.4932	6	57.0796	6	59.0854	4.26	61.1971	0.6874	FALSE	FALSE	Very Good	Yes	None	None	6194	Zoetis Dog
9088	9088	6182	6182	Donview Vet Centre	2017-05-04	124	542	3794	10	10.3945	5	2	6	2	5	5	3	5	2	6	3	4	1	6	2	4	4	1	1	4	2	0	3.29	47.5289	5.15	39.1062	4.15	30.211	3.59	53.079	-0.7983	TRUE	TRUE	Very Good	Yes	A Little	None	6182	Zoetis Dog
9091	9091	6183	6183	Taylor Veterinary Practice	2017-05-04	17	74.4286	521	1	1.4274	4	0	6	0	6	0	0	6	0	5	0	6	0	6	0	6	4	0	0	4	0	0	3.71	48.6646	6	57.0796	5.8	47.3945	3.97	56.9781	0.3637	FALSE	FALSE	Very Good	Yes	Not At All	None	6183	Zoetis Dog
9080	9080	4967	4967	Hills Veterinary Surgery	2017-05-02	29	129.143	904	2	2.47671	5	0	6	0	6	0	0	6	0	5	0	6	1	6	0	5	6	0	0	6	0	0	4.07	56.6157	5.9	48.9634	6	59.0854	3.72	53.6039	0.6371	FALSE	FALSE	Good	Yes	None	None	4967	Zoetis Dog
9039	9039	3929	3929	Fareham Creek Veterinary Surgery	2017-04-27	89	387	2709	7	7.42192	6	0	6	0	6	0	0	6	0	5	0	6	6	6	0	6	6	0	0	6	0	0	4.15	59.0676	5.37	41.8445	6	62.3168	3.97	57.9757	0.739	FALSE	TRUE	Very Good	Yes	Not At All	Unchanged	3929	Zoetis Dog
9031	9031	6140	6140	Hayle Veterinary Surgery	2017-04-26	64	281.857	1973	5	5.40548	6	0	4	0	6	0	0	6	0	3	0	5	0	5	0	3	6	2	0	6	0	0	3.66	47.6515	5.85	46.4416	6	59.0854	2.65	39.8365	0.4552	FALSE	FALSE	Very Good	Yes	None	None	6140	Zoetis Dog
9035	9035	5604	5604	Cedar Grove Veterinary Clinic	2017-04-26	7	32.7143	229	0	0.627397	6	0	6	0	6	0	0	6	0	6	0	6	0	6	0	6	6	0	0	6	0	0	4.15	58.4932	6	57.0796	6	59.0854	4.26	61.1971	0.6874	FALSE	FALSE	Very Good	Yes	None	None	5604	Zoetis Dog
8995	8995	6122	6122	Bakewell Veterinary Clinic	2017-04-22	25	111	777	2	2.12877	3	0	5	3	5	0	1	0	0	6	0	6	0	6	0	6	6	0	0	6	0	0	3.67	47.8864	5.72	41.7924	5.47	38.9282	3.22	47.0702	0.0772	FALSE	FALSE	Very Good	Yes	None	None	6122	Zoetis Dog
8974	8974	6109	6109	Myerscough Veterinary Group	2017-04-18	77	339	2373	6	6.50137	5	0	3	3	5	0	2	6	0	6	1	3	0	4	1	6	3	0	0	3	0	0	2.72	28.4737	5.63	39.3268	5.58	41.0984	4.26	61.1971	-0.2671	TRUE	FALSE	Good	Yes	Not At All	None	6109	Zoetis Dog
8937	8937	6084	6084	Bay Vets Ltd	2017-04-15	44	194.714	1363	3	3.73425	6	0	6	0	6	0	1	6	0	6	0	6	0	6	0	6	6	0	0	6	0	0	4.09	57.0238	6	57.0796	6	59.0854	4.26	61.1971	0.6604	FALSE	FALSE	Very Good	Yes	None	None	6084	Zoetis Dog
8920	8920	4756	4756	Bush House Vets	2017-04-13	53	234.429	1641	4	4.49589	6	0	6	0	6	0	0	6	0	6	0	6	0	6	0	6	6	0	0	6	0	0	4.15	58.4932	6	57.0796	6	59.0854	4.26	61.1971	0.6874	FALSE	FALSE	Very Good	Yes	None	None	4756	Zoetis Dog
8898	8898	6054	6054	Grahams Road Vet Clinic	2017-04-09	15	66	462	1	1.26575	6	0	6	0	6	0	0	6	6	2	0	6	0	6	0	3	5	0	0	6	0	0	4.09	57.1005	5.39	34.1909	5.9	51.7692	2.36	36.0692	0.5026	FALSE	FALSE	Very Good	Yes	None	None	6054	Zoetis Dog
8899	8899	6055	6055	My Pets Vets Ltd	2017-04-09	7	31.5714	221	0	0.605479	4	0	6	0	6	0	2	6	0	4	0	6	0	6	0	6	6	0	0	6	0	0	3.86	51.9706	6	57.0796	6	59.0854	3.68	53.0262	0.5642	FALSE	FALSE	Good	Yes	None	None	6055	Zoetis Dog
8879	8879	5255	5255	Nuvet	2017-04-06	15	65.8571	461	1	1.26301	6	0	5	0	6	0	0	6	0	6	0	6	0	6	0	6	6	0	0	6	0	0	4.06	56.2601	6	57.0796	6	59.0854	4.26	61.1971	0.6462	FALSE	FALSE	Good	Yes	Not At All	Unchanged	5255	Zoetis Dog
8798	8798	5320	5320	Robert Young Veterinary Surgeon	2017-03-24	70	305.714	2140	5	5.86301	5	0	5	1	4	1	2	5	0	3	1	5	0	5	1	4	6	1	0	5	1	1	3.38	41.813	5.64	39.4377	5.52	39.8514	2.72	40.7738	-0.0267	TRUE	FALSE	Very Good	Yes	A Little	Unchanged	5320	Zoetis Dog
8783	8783	5694	5694	University of Bristol Canine Osteoarthritis Resear	2017-03-22	97	423.571	2965	8	8.12329	5	1	5	1	5	1	0	6	0	5	1	5	0	6	0	5	5	0	0	6	0	0	3.75	53.5035	5.91	54.4691	5.52	44.6251	3.72	54.7338	0.2599	FALSE	TRUE	Good	Yes	Not At All	Unchanged	5694	Zoetis Dog
8726	8726	5948	5948	Taylor Veterinary Practice	2017-03-16	89	389	2723	7	7.46027	6	0	6	0	6	0	3	6	0	3	0	6	0	6	0	3	6	0	0	6	0	0	3.96	56.3705	6	60.4527	6	62.3168	2.65	41.5063	0.6516	FALSE	TRUE	Very Good	Yes	None	None	5948	Zoetis Dog
8727	8727	5949	5949	Taylor Veterinary Practice	2017-03-16	89	389	2723	7	7.46027	6	0	5	0	6	0	0	0	0	6	0	6	0	6	0	6	4	0	0	4	0	0	3.78	53.8297	6	60.4527	5.27	40.7487	3.22	48.4563	0.1183	FALSE	TRUE	Very Good	Yes	None	None	5949	Zoetis Dog
8690	8690	5925	5925	University of Bristol Canine Osteoarthritis Resear	2017-03-13	88	384.143	2689	7	7.36712	5	1	6	0	6	1	1	5	0	6	1	5	1	6	0	6	6	0	0	6	1	0	3.92	55.7874	5.9	53.9396	5.41	42.7575	4.09	59.5692	0.2699	FALSE	TRUE	Very Good	Yes	None	None	5925	Zoetis Dog
8675	8675	5519	5519	Palmer & Duncan Vets Ltd	2017-03-12	13	57.8571	405	1	1.10959	6	0	6	0	6	0	0	6	0	6	0	6	0	6	0	6	6	0	0	6	0	0	4.15	58.4932	6	57.0796	6	59.0854	4.26	61.1971	0.6874	FALSE	FALSE	Very Good	Yes	None	None	5519	Zoetis Dog
8677	8677	3361	3361	My Pets Vets Ltd	2017-03-12	48	210.143	1471	4	4.03014	6	0	6	0	6	0	4	6	0	6	0	6	0	6	0	6	6	0	0	6	0	0	3.9	52.7507	6	57.0796	6	59.0854	4.26	61.1971	0.5794	FALSE	FALSE	Very Good	Yes	Not At All	Unchanged	3361	Zoetis Dog
8622	8622	5399	5399	Milton Keynes Vet Group	2017-03-08	163	711.571	4981	13	13.6466	5	0	3	3	5	0	3	5	1	3	2	3	1	4	4	5	5	1	1	3	1	1	2.72	40.3504	4.88	36.4036	5.44	43.2118	2.97	45.4135	-0.2659	TRUE	TRUE	Very Good	Yes	Not At All	Unchanged	5399	Zoetis Dog
8371	8371	3180	3180	The Meopham Veterinary Hospital	2017-03-02	30	134.571	942	2	2.58082	5	2	5	4	6	1	2	2	1	4	1	6	1	6	1	4	5	3	1	4	1	2	3.45	43.1132	4.79	26.1172	4.94	31.5322	2.49	37.8158	-0.5232	TRUE	FALSE	qol.transition_question.answer.very_good	qol.transition_question.answer.yes	None	None	3180	Zoetis Dog
8379	8379	5747	5747	Willows Veterinary Centre Ltd.	2017-03-02	112	487.571	3413	9	9.35068	6	0	5	0	6	0	1	6	0	5	0	6	0	6	0	5	4	0	0	4	0	0	3.71	52.9872	6	60.4527	5.8	51.5262	3.72	54.7338	0.4154	FALSE	TRUE	qol.transition_question.answer.very_good	qol.transition_question.answer.yes	None	None	5747	Zoetis Dog
8390	8390	5750	5750	0	2017-03-02	75	329.429	2306	6	6.31781	6	0	5	2	6	0	2	0	0	6	0	5	0	6	1	6	6	0	0	5	0	0	3.76	49.7569	5.73	41.9721	5.47	38.9282	3.22	47.0702	0.1155	FALSE	FALSE	qol.transition_question.answer.very_good	qol.transition_question.answer.yes	qol.transition_question.answer.not_at_all	None	5750	Zoetis Dog
8391	8391	5751	5751	0	2017-03-02	89	390.286	2732	7	7.48493	5	1	4	1	5	1	2	0	0	5	1	4	0	4	1	4	5	0	0	5	0	0	3.19	46.2399	5.82	51.0198	4.99	37.4056	2.44	38.855	-0.3262	TRUE	TRUE	qol.transition_question.answer.very_good	qol.transition_question.answer.yes	qol.transition_question.answer.not_at_all	None	5751	Zoetis Dog
8394	8394	5390	5390	University of Bristol Canine Osteoarthritis Resear	2017-03-02	88	382.571	2678	7	7.33699	5	1	6	1	6	1	1	5	0	5	2	5	0	6	0	5	5	0	0	5	1	0	3.78	53.8892	5.91	54.4691	5.19	39.6317	3.55	52.5338	0.067	FALSE	TRUE	qol.transition_question.answer.very_good	qol.transition_question.answer.yes	None	None	5390	Zoetis Dog
8417	8417	5244	5244	University of Bristol Canine Osteoarthritis Resear	2017-03-02	122	530.429	3713	10	10.1726	4	5	3	1	5	1	1	5	0	6	1	5	0	4	0	5	5	0	0	4	1	0	3.08	44.9003	5.91	54.4691	4.89	36.333	3.84	56.2482	-0.4399	TRUE	TRUE	qol.transition_question.answer.good	qol.transition_question.answer.yes	qol.transition_question.answer.a_little	qol.transition_question.answer.unchanged	5244	Zoetis Dog
8424	8424	5758	5758	Cedar Grove Veterinary Clinic	2017-03-02	6	28.4286	199	0	0.545205	5	0	6	0	5	0	2	6	0	4	0	6	0	6	0	5	6	0	0	6	0	0	3.87	52.0921	6	57.0796	6	59.0854	3.43	49.8001	0.5666	FALSE	FALSE	qol.transition_question.answer.very_good	qol.transition_question.answer.yes	None	None	5758	Zoetis Dog
8432	8432	5593	5593	Millennium Veterinary Practice	2017-03-02	22	98	686	1	1.87945	6	0	5	1	4	0	1	4	0	3	0	5	0	6	0	6	3	1	0	5	0	1	3.43	42.8617	5.73	41.9269	5.53	40.0509	3.04	44.8309	0.0151	FALSE	FALSE	qol.transition_question.answer.good	qol.transition_question.answer.yes	None	None	5593	Zoetis Dog
8437	8437	4811	4811	St. Anne's Veterinary Group	2017-03-02	22	99.4286	696	1	1.90685	6	0	5	1	5	0	2	6	0	6	0	5	0	6	0	6	5	0	0	5	0	0	3.63	46.8787	5.91	49.6232	5.9	51.7692	4.26	61.1971	0.3813	FALSE	FALSE	qol.transition_question.answer.very_good	qol.transition_question.answer.yes	qol.transition_question.answer.not_at_all	qol.transition_question.answer.unchanged	4811	Zoetis Dog
8440	8440	5761	5761	Stanley House Veterinary Surgeons	2017-03-02	3	16.4286	115	0	0.315068	5	0	6	0	5	0	3	0	0	6	0	5	0	5	0	4	4	0	0	5	0	0	3.43	42.8388	6	57.0796	5.27	35.7177	2.73	40.8163	-0.1193	TRUE	FALSE	qol.transition_question.answer.good	qol.transition_question.answer.yes	qol.transition_question.answer.not_at_all	None	5761	Zoetis Dog
8455	8455	5766	5766	Milan Veterinary Practice	2017-03-02	9	42.8571	300	0	0.821918	6	0	6	0	6	0	0	6	0	4	0	6	0	5	0	5	6	0	0	6	0	0	4.07	56.4885	6	57.0796	6	59.0854	3.43	49.8001	0.6504	FALSE	FALSE	qol.transition_question.answer.very_good	qol.transition_question.answer.yes	None	None	5766	Zoetis Dog
8469	8469	5326	5326	University of Bristol Canine Osteoarthritis Resear	2017-03-02	112	489.571	3427	9	9.38904	4	1	2	1	5	1	0	5	0	5	1	5	0	4	1	4	4	1	0	4	2	0	2.93	42.9642	5.74	48.7366	5.1	38.5419	3.3	49.4764	-0.3827	TRUE	TRUE	qol.transition_question.answer.good	qol.transition_question.answer.yes	None	None	5326	Zoetis Dog
8475	8475	5771	5771	Tender Paws vets	2017-03-02	5	23.5714	165	0	0.452055	5	0	5	0	6	0	1	6	0	6	0	6	0	6	0	6	6	0	0	6	0	0	3.91	53.0201	6	57.0796	6	59.0854	4.26	61.1971	0.5846	FALSE	FALSE	qol.transition_question.answer.very_good	qol.transition_question.answer.yes	None	None	5771	Zoetis Dog
8478	8478	2938	2938	Milan Veterinary Practice	2017-03-02	23	103.286	723	1	1.98082	5	0	6	0	5	0	1	6	0	4	0	5	1	5	0	5	5	0	0	5	0	0	3.62	46.7153	5.9	48.9634	5.9	51.7692	3.43	49.8001	0.3762	FALSE	FALSE	qol.transition_question.answer.very_good	qol.transition_question.answer.yes	None	None	2938	Zoetis Dog
8512	8512	4846	4846	Bush House Vets	2017-03-02	80	350.571	2454	6	6.72329	4	0	6	0	4	0	2	1	1	2	0	5	0	6	0	5	6	3	2	5	1	1	3.36	41.4038	5.36	33.5972	5.44	38.3568	1.99	30.9766	-0.1326	TRUE	FALSE	qol.transition_question.answer.very_good	qol.transition_question.answer.yes	None	None	4846	Zoetis Dog
8515	8515	5779	5779	Winton Lodge Veterinary Clinic	2017-03-02	53	232.857	1630	4	4.46575	6	0	6	1	6	0	1	6	0	0	0	6	0	6	0	6	6	0	0	6	0	0	4.09	57.0238	5.91	49.6232	6	59.0854	2.52	38.1619	0.6464	FALSE	FALSE	qol.transition_question.answer.very_good	qol.transition_question.answer.yes	None	None	5779	Zoetis Dog
8522	8522	5783	5783	Abbey Veterinary Group LTD	2017-03-02	5	23.5714	165	0	0.452055	6	0	6	0	6	0	3	6	0	5	0	6	0	6	0	6	6	0	0	6	0	0	3.96	54.1545	6	57.0796	6	59.0854	3.97	56.9781	0.6064	FALSE	FALSE	qol.transition_question.answer.very_good	qol.transition_question.answer.yes	None	None	5783	Zoetis Dog
8523	8523	5784	5784	Batchelor, Davidson and Watson Ltd	2017-03-02	8	38	266	0	0.728767	5	0	5	1	5	0	1	6	1	5	0	6	0	6	0	5	6	1	1	6	0	0	3.78	50.0433	5.63	39.1079	6	59.0854	3.72	53.6039	0.4699	FALSE	FALSE	qol.transition_question.answer.very_good	qol.transition_question.answer.yes	qol.transition_question.answer.not_at_all	None	5784	Zoetis Dog
8535	8535	2916	2916	Arden House Animal Hospital	2017-03-02	24	104.429	731	2	2.00274	6	0	6	0	6	0	0	6	0	6	0	6	0	6	0	6	6	0	0	6	0	0	4.15	58.4932	6	57.0796	6	59.0854	4.26	61.1971	0.6874	FALSE	FALSE	qol.transition_question.answer.very_good	qol.transition_question.answer.yes	None	None	2916	Zoetis Dog
8570	8570	4489	4489	Cedar Grove Veterinary Clinic	2017-03-02	43	190.571	1334	3	3.65479	6	6	6	1	6	0	5	6	0	4	0	5	0	6	0	5	6	0	0	6	0	0	3.75	49.471	5.91	49.6232	5.36	37.0405	3.43	49.8001	0.0613	FALSE	FALSE	Very Good	Yes	None	None	4489	Zoetis Dog
8360	8360	5741	5741	Avonvale Veterinary Centre - Wellesbourne	2017-03-01	80	348.429	2439	6	6.68219	5	0	3	0	4	4	0	0	0	2	0	4	0	4	0	2	3	0	0	4	0	0	2.94	32.9018	6	57.0796	4.59	27.9954	1.07	15.7575	-0.7987	TRUE	FALSE	Very Good	Yes	Not At All	None	5741	Zoetis Dog
8347	8347	1192	1192	Nuvet	2017-02-27	122	532	3724	10	10.2027	6	0	6	0	6	0	0	6	0	6	0	6	0	6	0	6	6	0	0	6	0	0	4.15	59.0676	6	60.4527	6	62.3168	4.26	62.0292	0.739	FALSE	TRUE	Very Good	Yes	Not At All	Unchanged	1192	Zoetis Dog
8332	8332	5724	5724	Stanley House Veterinary Surgeons	2017-02-25	13	60.1429	421	1	1.15342	5	0	5	0	5	3	0	5	0	5	0	5	0	5	0	5	4	0	0	5	0	0	3.53	44.7669	6	57.0796	5.28	35.742	3.55	51.3141	-0.0783	TRUE	FALSE	Very Good	Yes	Not At All	None	5724	Zoetis Dog
8317	8317	5716	5716	Sunninghill Village Veterinary Clinic	2017-02-22	42	185	1295	3	3.54795	6	0	0	0	6	0	0	6	0	0	0	6	0	5	0	6	5	0	0	6	0	0	3.43	42.7246	6	57.0796	5.9	51.7692	2.52	38.1619	0.31	FALSE	FALSE	Very Good	Yes	Not At All	None	5716	Zoetis Dog
8276	8276	5446	5446	Westport Vet Clinic	2017-02-18	6	29.2857	205	0	0.561644	6	0	6	0	5	0	1	6	0	4	0	6	0	6	0	6	6	0	0	6	0	0	4.01	55.3018	6	57.0796	6	59.0854	3.68	53.0262	0.6282	FALSE	FALSE	Very Good	Yes	None	None	5446	Zoetis Dog
8253	8253	5173	5173	Animal Trust	2017-02-15	41	179.857	1259	3	3.44932	4	6	6	0	6	0	6	6	0	4	0	6	0	6	0	6	6	0	0	6	0	0	3.61	46.552	6	57.0796	5.36	37.0405	3.68	53.0262	0.0166	FALSE	FALSE	Very Good	Yes	Not At All	Unchanged	5173	Zoetis Dog
8258	8258	5691	5691	Batchelor, Davidson and Watson Ltd	2017-02-15	6	28.7143	201	0	0.550685	4	0	5	0	5	0	0	5	0	6	0	6	0	6	0	5	5	0	0	5	5	0	3.68	47.9805	6	57.0796	5.21	34.8692	3.84	55.1801	-0.0553	TRUE	FALSE	Very Good	Yes	Not At All	None	5691	Zoetis Dog
8259	8259	2628	2628	Cedar Grove Veterinary Clinic	2017-02-15	32	140.714	985	2	2.69863	3	0	5	4	4	0	5	6	4	3	0	4	0	4	1	4	4	2	2	4	0	0	2.59	25.8427	4.78	25.9337	5.8	47.3945	2.9	42.9751	-0.2968	TRUE	FALSE	Good	Yes	None	None	2628	Zoetis Dog
8224	8224	5670	5670	Nethan Valley Veterinary Centre	2017-02-11	6	29	203	0	0.556164	6	0	6	0	6	0	0	6	0	6	0	6	0	6	0	6	6	0	0	6	0	0	4.15	58.4932	6	57.0796	6	59.0854	4.26	61.1971	0.6874	FALSE	FALSE	Very Good	Yes	Not At All	None	5670	Zoetis Dog
8227	8227	5673	5673	Nethan Valley Veterinary Centre	2017-02-11	6	29	203	0	0.556164	6	0	6	0	6	0	0	6	0	5	0	6	0	6	0	5	6	0	0	6	0	0	4.15	58.4932	6	57.0796	6	59.0854	3.72	53.6039	0.6874	FALSE	FALSE	Very Good	Yes	Not At All	None	5673	Zoetis Dog
8216	8216	4764	4764	Bush House Vets	2017-02-09	11	50.4286	353	0	0.967123	6	0	6	0	6	0	1	6	0	4	0	6	0	5	0	4	6	1	0	6	0	0	3.94	53.6844	5.92	50.595	6	59.0854	3.19	46.6467	0.5858	FALSE	FALSE	Very Good	Yes	Not At All	Unchanged	4764	Zoetis Dog
8212	8212	5667	5667	Stanley House Veterinary Surgeons	2017-02-08	39	170.571	1194	3	3.27123	6	0	6	0	6	0	0	6	0	5	0	6	0	6	0	5	6	6	0	6	0	0	3.79	50.2825	5.54	37.0355	6	59.0854	3.72	53.6039	0.4613	FALSE	FALSE	Very Good	Yes	Not At All	None	5667	Zoetis Dog
8201	8201	5412	5412	Avonvale Veterinary Centre - Southam	2017-02-07	5	24.8571	174	0	0.476712	3	3	5	2	4	0	2	4	1	5	0	5	0	6	0	6	6	0	0	6	1	0	3.45	43.1589	5.71	41.5277	5.38	37.4194	3.62	52.2763	-0.0803	TRUE	FALSE	Good	Yes	None	None	5412	Zoetis Dog
8189	8189	4413	4413	Wildbore Veterinary Ltd	2017-02-05	46	202.286	1416	3	3.87945	4	0	4	0	6	0	1	6	0	5	0	5	1	5	0	6	5	0	0	5	0	0	3.42	42.5877	5.9	48.9634	5.9	51.7692	3.97	56.9781	0.2914	FALSE	FALSE	Very Good	Yes	None	None	4413	Zoetis Dog
8164	8164	5638	5638	Bishops Veterinary Surgery	2017-02-02	15	68.4286	479	1	1.31233	6	0	6	0	6	0	3	6	0	4	0	6	1	6	0	5	5	0	0	6	0	0	3.9	52.8241	5.9	48.9634	5.9	51.7692	3.43	49.8001	0.4975	FALSE	FALSE	Very Good	Yes	None	None	5638	Zoetis Dog
8088	8088	5595	5595	University of Bristol Canine Osteoarthritis Resear	2017-01-25	28	123.571	865	2	2.36986	6	0	6	0	6	0	0	6	0	4	0	6	0	6	0	4	4	1	1	5	0	0	3.89	52.5795	5.82	45.3248	5.8	47.3945	3.19	46.6467	0.4138	FALSE	FALSE	Very Good	Yes	None	None	5595	Zoetis Dog
8099	8099	5211	5211	Abbey Veterinary Group Ltd	2017-01-25	117	511.571	3581	9	9.81096	4	5	5	2	6	0	2	6	0	4	1	5	0	6	0	5	5	1	1	5	0	0	3.48	49.9342	5.63	46.2066	5.24	40.3296	3.43	51.0792	-0.0383	TRUE	TRUE	Good	Yes	None	None	5211	Zoetis Dog
8032	8032	4691	4691	Stanley House Veterinary Surgeons	2016-12-20	63	276.286	1934	5	5.29863	5	0	6	0	5	0	1	6	6	2	0	5	0	6	6	3	6	1	1	6	0	1	3.78	50.2347	4.58	23.9916	6	59.0854	2.36	36.0692	0.3169	FALSE	FALSE	Very Good	Yes	None	None	4691	Zoetis Dog
7995	7995	5580	5580	The Forest Vet	2016-12-16	36	160.143	1121	3	3.07123	6	0	6	0	6	0	0	6	0	6	0	6	0	6	0	6	6	0	0	0	0	0	3.67	47.8629	6	57.0796	6	59.0854	4.26	61.1971	0.4827	FALSE	FALSE	Very Good	Yes	None	None	5580	Zoetis Dog
7994	7994	4162	4162	Irving Veterinary Surgery	2016-12-15	31	137	959	2	2.6274	5	0	5	0	6	0	1	6	0	5	0	5	0	6	0	6	6	0	0	6	0	0	3.82	51.0994	6	57.0796	6	59.0854	3.97	56.9781	0.5472	FALSE	FALSE	Very Good	Yes	None	None	4162	Zoetis Dog
7926	7926	1111	1111	Knutsford Veterinary Surgery	2016-12-06	34	147.714	1034	2	2.83288	5	0	6	1	6	0	0	6	0	6	0	6	0	6	0	6	5	0	0	5	0	0	3.93	53.4625	5.91	49.6232	5.9	51.7692	4.26	61.1971	0.5116	FALSE	FALSE	Very Good	Yes	Not At All	Unchanged	1111	Zoetis Dog
7920	7920	5549	5549	Fareham Creek Veterinary Surgery	2016-12-05	51	222	1554	4	4.25753	5	3	6	5	6	3	1	3	1	6	3	5	1	6	1	4	5	1	0	5	4	0	3.72	48.8539	5.17	30.6575	4.02	23.2908	3.25	47.4094	-0.9854	TRUE	FALSE	Very Good	Yes	A Little	None	5549	Zoetis Dog
7908	7908	5544	5544	0	2016-12-04	37	160.857	1126	3	3.08493	6	6	6	6	6	0	0	0	0	2	0	0	0	4	0	6	6	0	0	6	0	0	3.45	43.2734	5.44	35.1302	4.83	30.3379	2.06	32.0065	-0.4987	TRUE	FALSE	Very Good	Yes	Not At All	None	5544	Zoetis Dog
7864	7864	5522	5522	Myerscough Veterinary Group	2016-11-28	5	21.8571	153	0	0.419178	6	0	5	0	6	0	1	6	0	3	0	6	0	6	0	6	6	0	0	6	0	0	3.99	54.8263	6	57.0796	6	59.0854	3.39	49.2421	0.6192	FALSE	FALSE	Very Good	Yes	None	None	5522	Zoetis Dog
7844	7844	5514	5514	The Meopham Veterinary Hospital	2016-11-26	42	184.429	1291	3	3.53699	5	0	3	1	5	0	3	6	1	2	0	5	0	5	1	5	6	0	0	5	0	1	3.26	39.3667	5.61	38.8216	6	59.0854	2.85	42.4261	0.2493	FALSE	FALSE	Very Good	Yes	None	None	5514	Zoetis Dog
7847	7847	5517	5517	Taylor Veterinary Practice	2016-11-26	11	48	336	0	0.920548	4	1	5	2	5	0	5	0	0	6	0	3	0	5	0	0	4	0	0	4	0	0	2.87	31.4891	5.81	45.09	5.17	34.2418	1.74	27.3683	-0.4593	TRUE	FALSE	Good	Yes	None	None	5517	Zoetis Dog
7735	7735	2280	2280	Bredy Veterinary Centre	2016-11-23	133	579	4053	11	11.1041	3	3	3	3	3	3	3	3	3	3	3	3	3	3	3	3	3	3	3	3	3	3	2.08	31.949	3.99	29.7477	3.94	28.7496	2.13	34.9134	-1.485	TRUE	TRUE	Good	Yes	None	None	2280	Zoetis Dog
7607	7607	5440	5440	Withy Grove Veterinary Clinic	2016-11-11	171	745.143	5216	14	14.2904	4	0	5	0	4	1	1	6	0	6	1	4	0	5	2	2	3	0	1	3	0	0	3	43.8556	5.72	48.221	5.43	43.0764	3.27	49.1086	-0.1427	TRUE	TRUE	Very Good	Yes	Not At All	None	5440	Zoetis Dog
7532	7532	5400	5400	Tweed House Veterinary Surgery	2016-11-04	37	164.571	1152	3	3.15616	5	0	6	0	5	0	3	6	6	5	0	5	0	5	0	5	6	0	0	5	0	0	3.55	45.3213	5.39	34.1909	6	59.0854	3.72	53.6039	0.3394	FALSE	FALSE	Very Good	Yes	None	None	5400	Zoetis Dog
7522	7522	4399	4399	Batchelor, Davidson and Watson Ltd	2016-11-03	8	38.8571	272	0	0.745205	6	1	6	0	6	0	1	6	0	3	0	6	0	6	0	6	6	0	0	6	0	0	4.09	57.0238	6	57.0796	5.89	51.3251	3.39	49.2421	0.5871	FALSE	FALSE	Very Good	Yes	None	None	4399	Zoetis Dog
7526	7526	5395	5395	Lakeside Veterinary Surgery	2016-11-03	23	102.714	719	1	1.96986	5	0	4	0	5	0	0	6	0	6	0	5	0	5	0	6	6	0	0	6	0	0	3.63	46.9254	6	57.0796	6	59.0854	4.26	61.1971	0.4638	FALSE	FALSE	Good	Yes	Not At All	None	5395	Zoetis Dog
7482	7482	5374	5374	Avonvale Veterinary Centre - Kenilworth	2016-10-27	15	65.7143	460	1	1.26027	6	0	0	0	6	0	2	6	0	6	0	6	0	6	0	6	6	0	0	6	0	0	3.45	43.1361	6	57.0796	6	59.0854	4.26	61.1971	0.3861	FALSE	FALSE	Very Good	Yes	Not At All	None	5374	Zoetis Dog
7468	7468	5362	5362	DierenDokters Ede	2016-10-25	67	294.857	2064	5	5.65479	4	0	3	4	4	0	1	6	0	6	0	4	0	5	0	6	4	0	0	3	0	0	2.86	31.332	5.63	39.1805	5.8	47.3945	4.26	61.1971	-0.0532	TRUE	FALSE	Zeer goed	Ja	None	None	5362	Zoetis Dog
7471	7471	5364	5364	County Vets	2016-10-25	155	675.143	4726	12	12.9479	4	5	3	2	5	0	2	4	0	5	3	4	2	4	1	5	3	1	0	4	0	1	2.75	40.7292	5.34	41.3395	4.62	33.8472	3.38	50.3785	-0.76	TRUE	TRUE	Good	Yes	A Little	None	5364	Zoetis Dog
7449	7449	5351	5351	Millennium Veterinary Practice	2016-10-21	35	154.857	1084	2	2.96986	6	0	6	0	6	0	0	6	0	6	0	6	0	6	0	5	6	0	0	6	0	0	4.15	58.4932	6	57.0796	6	59.0854	4.01	57.5887	0.6874	FALSE	FALSE	Very Good	Yes	Not At All	None	5351	Zoetis Dog
7388	7388	5325	5325	Market Cross Veterinary Clinic	2016-10-13	34	149.571	1047	2	2.86849	6	6	6	0	6	0	0	6	0	6	0	6	0	6	0	6	6	0	0	6	0	0	4.15	58.4932	6	57.0796	5.36	37.0405	4.26	61.1971	0.2478	FALSE	FALSE	Good	Yes	None	None	5325	Zoetis Dog
7348	7348	4135	4135	Chertsey Vets	2016-10-09	29	127.143	890	2	2.43836	6	0	6	0	6	0	1	6	0	2	0	6	0	6	0	6	6	0	0	6	0	0	4.09	57.0238	6	57.0796	6	59.0854	3.1	45.548	0.6604	FALSE	FALSE	Very Good	Yes	None	None	4135	Zoetis Dog
7349	7349	4136	4136	Chertsey Vets	2016-10-09	38	165.429	1158	3	3.1726	6	0	6	0	6	0	1	6	0	3	0	6	0	6	0	3	5	0	0	6	0	0	4.03	55.6537	6	57.0796	5.9	51.7692	2.65	39.8365	0.5673	FALSE	FALSE	Very Good	Yes	None	None	4136	Zoetis Dog
7320	7320	5298	5298	Wildbore Veterinary Ltd	2016-10-04	3	16.7143	117	0	0.320548	6	6	6	6	6	6	6	6	0	5	6	6	6	6	0	6	6	0	0	6	0	0	3.77	49.9955	4.82	26.3802	3.72	21.1208	3.97	56.9781	-1.219	TRUE	FALSE	Very Good	Yes	None	None	5298	Zoetis Dog
7311	7311	4776	4776	Withy Grove Veterinary Clinic	2016-10-03	134	584.286	4090	11	11.2055	4	0	5	0	6	0	1	6	0	5	0	5	0	6	0	6	5	0	0	5	0	1	3.6	51.5432	5.9	53.9396	5.9	55.564	3.97	57.9757	0.4254	FALSE	TRUE	Very Good	Yes	None	None	4776	Zoetis Dog
7285	7285	4746	4746	Bush House Vets	2016-09-30	73	319	2233	6	6.11781	6	0	5	0	6	0	1	6	6	3	0	6	0	6	0	6	6	0	0	6	0	0	3.99	54.8263	5.39	34.1909	6	59.0854	3.39	49.2421	0.5275	FALSE	FALSE	Very Good	Yes	Not At All	Unchanged	4746	Zoetis Dog
7270	7270	4025	4025	Donview Vet Centre	2016-09-29	9	40.8571	286	0	0.783562	6	0	6	0	6	0	1	0	0	5	0	6	0	6	0	5	5	0	0	5	0	0	3.95	53.8574	6	57.0796	5.37	37.2286	2.68	40.2631	0.1691	FALSE	FALSE	Very Good	Yes	None	None	4025	Zoetis Dog
7275	7275	4754	4754	Bush House Vets	2016-09-29	14	64.8571	454	1	1.24384	6	0	6	0	5	0	0	6	6	4	0	6	0	6	0	6	6	0	0	6	0	0	4.08	56.743	5.39	34.1909	6	59.0854	3.68	53.0262	0.5635	FALSE	FALSE	Very Good	Yes	None	None	4754	Zoetis Dog
7256	7256	5275	5275	Rivonia Village Veterinary Clinic	2016-09-28	96	417.429	2922	8	8.00548	4	1	3	1	5	1	1	6	0	6	1	5	0	4	1	6	4	0	0	4	0	0	3.02	44.1481	5.82	51.0198	5.42	42.9425	4.26	62.0292	-0.1371	TRUE	TRUE	Very Good	Yes	Not At All	None	5275	Zoetis Dog
7258	7258	5277	5277	Struthers and Scott	2016-09-28	45	196.286	1374	3	3.76438	6	0	5	0	5	0	0	5	0	5	0	5	0	5	0	6	6	0	0	6	0	0	3.81	50.7143	6	57.0796	5.91	52.3265	3.8	54.5909	0.4789	FALSE	FALSE	Very Good	Yes	None	None	5277	Zoetis Dog
7259	7259	5278	5278	Struthers and Scott	2016-09-28	80	350.429	2453	6	6.72055	4	0	5	0	5	4	3	1	0	3	4	3	0	4	3	3	3	1	3	3	2	0	2.71	28.2252	5.35	33.5247	3.93	22.6434	1.78	28.0205	-1.447	TRUE	FALSE	Very Good	Yes	None	None	5278	Zoetis Dog
7260	7260	5279	5279	Rivonia Village Veterinary Clinic	2016-09-28	129	561.857	3933	10	10.7753	4	4	4	1	1	0	0	4	2	4	0	4	0	4	1	4	5	2	3	4	0	0	2.73	40.4767	5.15	39.122	5.3	41.0892	2.84	43.8319	-0.3485	TRUE	TRUE	Good	Yes	A Little	None	5279	Zoetis Dog
7221	7221	3038	3038	Glenn Veterinary Clinic	2016-09-24	94	411.857	2883	7	7.89863	6	0	6	0	6	0	0	6	0	5	0	6	0	6	0	6	6	0	0	6	0	0	4.15	59.0676	6	60.4527	6	62.3168	3.97	57.9757	0.739	FALSE	TRUE	Very Good	Yes	None	None	3038	Zoetis Dog
7206	7206	1082	1082	Irving Veterinary Surgery	2016-09-23	115	502.571	3518	9	9.63836	6	0	5	0	6	0	0	6	0	6	0	6	0	6	0	6	6	0	0	5	0	0	3.98	56.5558	6	60.4527	6	62.3168	4.26	62.0292	0.6577	FALSE	TRUE	Very Good	Yes	None	None	1082	Zoetis Dog
7197	7197	4692	4692	The Pet Healthcare Centre	2016-09-22	14	63.4286	444	1	1.21644	5	0	6	0	6	0	0	6	0	5	0	6	0	6	0	6	6	0	0	6	0	0	4.07	56.6157	6	57.0796	6	59.0854	3.97	56.9781	0.6528	FALSE	FALSE	Good	Yes	None	None	4692	Zoetis Dog
7179	7179	3849	3849	St. Anne's Veterinary Group	2016-09-20	10	47.2857	331	0	0.906849	5	5	6	0	5	0	0	6	0	5	0	5	0	6	0	5	6	0	0	6	0	0	3.91	52.9466	6	57.0796	5.47	38.8668	3.72	53.6039	0.2168	FALSE	FALSE	Very Good	Yes	None	None	3849	Zoetis Dog
7149	7149	4250	4250	Wallace Veterinary Centre	2016-09-19	29	129.857	909	2	2.49041	6	0	6	0	6	0	0	6	0	6	0	6	0	6	0	6	0	0	0	6	0	0	3.79	50.4263	6	57.0796	5.41	37.8657	4.26	61.1971	0.1286	FALSE	FALSE	Very Good	Yes	None	None	4250	Zoetis Dog
7151	7151	4635	4635	Bright Side Vets	2016-09-19	37	162	1134	3	3.10685	6	0	6	0	6	0	0	6	0	3	0	6	0	6	0	1	6	0	0	6	0	0	4.15	58.4932	6	57.0796	6	59.0854	2.16	33.3397	0.6874	FALSE	FALSE	Very Good	Yes	None	None	4635	Zoetis Dog
7157	7157	5234	5234	Donview Vet Centre	2016-09-19	126	549.143	3844	10	10.5315	4	1	5	3	6	0	2	5	0	5	2	6	5	6	1	5	4	0	0	5	0	0	3.57	51.0811	5.11	38.6699	5.36	41.8959	3.55	52.5338	0.0724	FALSE	TRUE	Very Good	Yes	None	None	5234	Zoetis Dog
7139	7139	4115	4115	Charter Vets Biddulph	2016-09-18	160	698.571	4890	13	13.3973	3	0	3	1	6	0	3	6	6	6	0	4	0	4	1	6	4	0	0	3	0	0	2.72	40.3785	5.21	39.7732	5.8	51.5262	4.26	62.0292	-0.0412	TRUE	TRUE	Good	Yes	None	None	4115	Zoetis Dog
7116	7116	5217	5217	Rivonia Village Veterinary Clinic	2016-09-16	15	67	469	1	1.28493	6	0	6	0	5	0	0	6	0	3	0	6	0	6	0	5	5	0	0	5	0	0	3.94	53.5858	6	57.0796	5.9	51.7692	3.14	46.097	0.5279	FALSE	FALSE	Very Good	Yes	Not At All	None	5217	Zoetis Dog
7117	7117	5218	5218	Luxstowe Vets	2016-09-16	19	84.4286	591	1	1.61918	5	0	5	0	6	6	6	6	0	3	0	5	0	5	0	3	3	0	0	5	0	0	3.16	37.3183	6	57.0796	4.82	30.2863	2.65	39.8365	-0.5428	TRUE	FALSE	Very Good	Yes	None	None	5218	Zoetis Dog
7106	7106	5214	5214	Luxstowe Vets	2016-09-14	24	107.857	755	2	2.06849	5	0	5	0	5	0	1	5	1	5	0	5	0	6	0	6	6	1	0	6	0	1	3.69	48.1689	5.72	41.6594	5.91	52.3265	3.8	54.5909	0.3856	FALSE	FALSE	Very Good	Yes	None	None	5214	Zoetis Dog
7077	7077	4485	4485	University of Bristol Canine Osteoarthritis Resear	2016-09-12	116	506	3542	9	9.70411	0	6	0	6	6	6	4	4	0	6	6	6	3	4	6	6	0	0	0	0	6	0	1.82	28.31	4.61	34.079	2.23	17.8529	3.91	57.217	-2.6538	TRUE	TRUE	Very Good	Yes	None	None	4485	Zoetis Dog
7061	7061	4392	4392	Wallace Veterinary Centre	2016-09-10	7	34.5714	242	0	0.663014	6	4	6	0	6	1	0	6	0	5	1	6	0	6	0	5	6	0	0	6	5	0	4.15	58.4932	6	57.0796	4.7	29.042	3.72	53.6039	-0.2056	TRUE	FALSE	Very Good	Yes	None	None	4392	Zoetis Dog
7065	7065	5196	5196	Charter Vets Biddulph	2016-09-10	5	22	154	0	0.421918	5	0	6	0	6	0	0	6	0	2	0	6	0	6	0	0	6	0	0	6	0	0	4.07	56.6157	6	57.0796	6	59.0854	1.62	25.5137	0.6528	FALSE	FALSE	Very Good	Yes	None	None	5196	Zoetis Dog
7066	7066	5197	5197	Charter Vets Biddulph	2016-09-10	5	25.2857	177	0	0.484932	6	0	6	0	6	0	0	6	0	6	0	6	0	6	6	6	6	0	0	6	0	0	4.15	58.4932	5.48	35.7931	6	59.0854	4.26	61.1971	0.6086	FALSE	FALSE	Very Good	Yes	None	None	5197	Zoetis Dog
7056	7056	1771	1771	Milan Veterinary Practice	2016-09-09	34	149.857	1049	2	2.87397	6	0	5	1	5	0	0	6	0	6	0	5	0	5	0	6	5	0	0	0	0	0	3.27	39.457	5.91	49.6232	5.9	51.7692	4.26	61.1971	0.2278	FALSE	FALSE	Very Good	Yes	None	None	1771	Zoetis Dog
7048	7048	5178	5178	St. Anne's Veterinary Group	2016-09-08	69	304	2128	5	5.83014	5	0	6	0	6	1	1	5	0	6	6	6	1	6	0	6	5	0	0	6	1	0	3.95	53.8327	5.9	48.9634	4.79	29.8956	4.09	58.6366	-0.249	TRUE	FALSE	Very Good	Yes	Somewhat	None	5178	Zoetis Dog
7040	7040	5171	5171	Wallace Veterinary Centre	2016-09-07	52	226.857	1588	4	4.35068	5	6	5	0	6	0	0	6	0	6	0	6	0	5	0	6	6	0	0	6	0	0	3.89	52.5063	6	57.0796	5.36	37.0405	4.26	61.1971	0.135	FALSE	FALSE	Very Good	Yes	None	None	5171	Zoetis Dog
7033	7033	5167	5167	Bakewell Veterinary Clinic	2016-09-06	86	374.429	2621	7	7.18082	6	1	3	0	3	0	0	3	2	1	0	4	0	4	0	0	6	1	0	6	0	0	3.23	46.7296	5.72	48.1494	5.63	46.7701	0.81	12.6219	0.0837	FALSE	TRUE	Very Good	Yes	A Little	None	5167	Zoetis Dog
7007	7007	3709	3709	Grahams Road Vet Clinic	2016-09-04	13	58	406	1	1.11233	6	0	6	3	6	0	0	6	0	6	0	6	3	6	0	6	6	0	0	6	0	0	4.15	58.4932	5.41	34.4972	6	59.0854	4.26	61.1971	0.5983	FALSE	FALSE	Very Good	Yes	None	None	3709	Zoetis Dog
7003	7003	5148	5148	Bush House Vets	2016-09-03	9	40.1429	281	0	0.769863	6	0	6	1	6	0	0	6	0	6	0	6	0	6	0	6	6	0	0	6	0	0	4.15	58.4932	5.91	49.6232	6	59.0854	4.26	61.1971	0.6734	FALSE	FALSE	Very Good	Yes	None	None	5148	Zoetis Dog
6995	6995	4575	4575	Stanley House Veterinary Surgeons	2016-09-02	52	229	1603	4	4.39178	6	0	6	0	6	0	0	6	0	6	0	6	0	6	0	6	6	0	0	6	0	0	4.15	58.4932	6	57.0796	6	59.0854	4.26	61.1971	0.6874	FALSE	FALSE	Very Good	Yes	None	None	4575	Zoetis Dog
6978	6978	5136	5136	Bush House Vets	2016-09-01	99	430.571	3014	8	8.25753	5	0	3	0	5	1	1	5	1	2	1	1	0	4	1	2	4	0	0	5	0	0	2.83	41.7646	5.81	50.7384	5.44	43.2391	1.94	32.3553	-0.2133	TRUE	TRUE	Good	Yes	None	None	5136	Zoetis Dog
6970	6970	5131	5131	University of Bristol Canine Osteoarthritis Resear	2016-08-31	81	355	2485	6	6.80822	5	0	5	2	4	0	3	0	4	5	0	4	0	4	4	4	4	0	0	4	0	0	3.01	43.9531	5.06	38.1148	5.27	40.7487	2.44	38.855	-0.2366	TRUE	TRUE	Good	Yes	None	None	5131	Zoetis Dog
6975	6975	5134	5134	Cockburn Veterinary Group	2016-08-31	25	109.857	769	2	2.10685	4	0	4	1	6	0	0	6	6	6	0	6	0	4	0	6	5	0	0	5	0	0	3.48	43.9153	5.3	32.6355	5.9	51.7692	4.26	61.1971	0.229	FALSE	FALSE	Good	Yes	None	None	5134	Zoetis Dog
6959	6959	5121	5121	Parkside Veterinary Centre	2016-08-30	30	134.286	940	2	2.57534	6	0	6	0	6	0	0	6	0	6	0	6	0	6	0	6	6	0	0	6	0	0	4.15	58.4932	6	57.0796	6	59.0854	4.26	61.1971	0.6874	FALSE	FALSE	Very Good	Yes	None	None	5121	Zoetis Dog
6961	6961	5122	5122	Taylor Veterinary Practice	2016-08-30	3	17	119	0	0.326027	6	0	6	0	6	0	0	6	0	5	0	6	0	6	0	6	6	0	0	6	0	0	4.15	58.4932	6	57.0796	6	59.0854	3.97	56.9781	0.6874	FALSE	FALSE	Very Good	Yes	None	None	5122	Zoetis Dog
6965	6965	5125	5125	Donview Vet Centre	2016-08-30	24	107.857	755	2	2.06849	2	0	2	2	4	0	2	5	1	5	6	4	0	3	4	3	3	0	0	2	0	0	2.23	18.1861	5.36	33.7189	4.86	30.6157	3.06	44.9996	-1.0143	TRUE	FALSE	Very Good	Yes	None	None	5125	Zoetis Dog
6951	6951	5116	5116	Rathgael Veterinary Clinic	2016-08-29	52	228.857	1602	4	4.38904	5	0	2	0	2	0	0	6	4	1	0	3	0	2	0	0	6	5	4	6	0	3	2.47	23.2285	4.48	23.0434	6	59.0854	1.33	20.6637	-0.2596	TRUE	FALSE	Very Good	Yes	None	None	5116	Zoetis Dog
6938	6938	3552	3552	My Pets Vets Ltd	2016-08-27	184	802.857	5620	15	15.3973	3	3	4	3	4	0	2	4	0	6	1	4	2	5	1	5	4	0	0	4	0	0	2.9	42.5879	5.43	42.5821	5.18	39.5494	3.67	54.0087	-0.3442	TRUE	TRUE	Very Good	Yes	None	None	3552	Zoetis Dog
6915	6915	5098	5098	VETCall Veterinary Surgery	2016-08-25	12	54.4286	381	1	1.04384	5	1	6	1	5	0	2	6	0	3	0	6	0	6	0	6	6	0	0	6	0	2	3.87	52.0921	5.7	41.0984	5.89	51.3251	3.39	49.2421	0.4479	FALSE	FALSE	Very Good	Yes	None	None	5098	Zoetis Dog
6811	6811	1650	1650	Provost Vet Group	2016-08-20	55	243.286	1703	4	4.66575	5	3	6	0	6	3	5	6	0	0	0	6	0	6	0	0	6	0	0	6	0	0	3.76	49.6139	6	57.0796	5.24	35.2402	1.04	15.0628	-0.0043	TRUE	FALSE	Very Good	Yes	None	None	1650	Zoetis Dog
6774	6774	4978	4978	Westport Vet Clinic	2016-08-16	10	45.8571	321	0	0.879452	4	1	6	0	5	0	0	5	0	5	0	6	0	6	0	5	5	0	0	5	0	0	3.78	50.0433	6	57.0796	5.71	44.2786	3.55	51.3141	0.3248	FALSE	FALSE	Very Good	Yes	None	None	4978	Zoetis Dog
6778	6778	4981	4981	The Forest Vet	2016-08-16	32	142.714	999	2	2.73699	6	6	6	6	6	6	6	6	0	0	0	0	0	0	0	0	0	0	0	0	0	0	1.89	10.5716	5.44	35.1302	3.89	22.3487	1.04	15.0628	-1.8125	TRUE	FALSE	Very Good	Yes	None	None	4981	Zoetis Dog
6753	6753	2159	2159	Milton Keynes Vet Group	2016-08-14	75	329.571	2307	6	6.32055	6	0	6	0	6	0	0	6	0	6	0	6	0	6	0	6	6	0	0	6	0	0	4.15	58.4932	6	57.0796	6	59.0854	4.26	61.1971	0.6874	FALSE	FALSE	Very Good	Yes	None	None	2159	Zoetis Dog
6736	6736	4173	4173	Milton Keynes Vet Group	2016-08-13	7	32.5714	228	0	0.624658	5	0	6	1	6	0	2	6	6	6	0	6	0	6	0	6	6	0	0	5	0	0	3.87	51.9949	5.3	32.6355	6	59.0854	4.26	61.1971	0.459	FALSE	FALSE	Very Good	Yes	None	None	4173	Zoetis Dog
6743	6743	4961	4961	Deane Vets	2016-08-13	3	16.4286	115	0	0.315068	5	2	6	1	5	0	1	6	0	5	0	5	1	6	0	6	5	0	0	4	0	2	3.63	46.8553	5.59	38.335	5.69	43.7702	3.97	56.9781	0.1871	FALSE	FALSE	Very Good	Yes	None	None	4961	Zoetis Dog
6709	6709	4942	4942	Strathmore Vets	2016-08-10	41	179.714	1258	3	3.44658	5	0	3	0	5	0	0	6	0	3	0	5	0	5	0	3	6	0	0	5	0	0	3.45	43.2505	6	57.0796	6	59.0854	2.65	39.8365	0.3884	FALSE	FALSE	Very Good	Yes	None	None	4942	Zoetis Dog
6664	6664	4922	4922	Ashgrove Veterinary Centre Ltd	2016-08-04	21	92.2857	646	1	1.76986	6	0	6	0	6	2	0	6	0	5	1	6	0	6	0	5	6	0	0	6	0	0	4.15	58.4932	6	57.0796	5.58	41.1349	3.72	53.6039	0.3989	FALSE	FALSE	Very Good	Yes	None	None	4922	Zoetis Dog
6656	6656	4919	4919	The Forest Vet	2016-08-03	35	152.714	1069	2	2.92877	5	0	6	0	6	0	0	6	0	6	0	6	0	6	0	6	6	0	0	6	0	0	4.07	56.6157	6	57.0796	6	59.0854	4.26	61.1971	0.6528	FALSE	FALSE	Very Good	Yes	None	None	4919	Zoetis Dog
6646	6646	4440	4440	Parkside Veterinary Centre	2016-08-02	6	27.7143	194	0	0.531507	6	0	6	0	5	0	1	6	6	5	0	6	0	6	1	5	6	1	0	6	0	1	3.95	53.9316	5.12	30.0692	6	59.0854	3.72	53.6039	0.47	FALSE	FALSE	Very Good	Yes	None	None	4440	Zoetis Dog
6631	6631	4299	4299	St. Anne's Veterinary Group	2016-08-01	19	82.5714	578	1	1.58356	6	0	6	0	6	0	0	6	0	6	0	6	0	6	0	6	6	0	0	6	0	0	4.15	58.4932	6	57.0796	6	59.0854	4.26	61.1971	0.6874	FALSE	FALSE	Very Good	Yes	None	None	4299	Zoetis Dog
6632	6632	4300	4300	St. Anne's Veterinary Group	2016-08-01	19	82.5714	578	1	1.58356	6	0	6	0	6	0	0	6	0	6	0	6	0	6	0	6	6	0	0	6	0	0	4.15	58.4932	6	57.0796	6	59.0854	4.26	61.1971	0.6874	FALSE	FALSE	Very Good	Yes	None	None	4300	Zoetis Dog
6637	6637	3258	3258	Park Hall Veterinary Clinic	2016-08-01	23	101	707	1	1.93699	6	0	6	0	6	0	0	6	6	6	0	6	0	6	0	6	6	0	0	6	0	0	4.15	58.4932	5.39	34.1909	6	59.0854	4.26	61.1971	0.5957	FALSE	FALSE	Very Good	Yes	None	None	3258	Zoetis Dog
6623	6623	4910	4910	Derwent Valley Vets Ltd	2016-07-31	9	42.2857	296	0	0.810959	6	0	6	0	6	0	3	6	0	6	0	6	0	6	0	6	6	0	0	6	0	0	3.96	54.1545	6	57.0796	6	59.0854	4.26	61.1971	0.6064	FALSE	FALSE	Very Good	Yes	None	None	4910	Zoetis Dog
6604	6604	3356	3356	Myerscough Veterinary Group	2016-07-28	38	168	1176	3	3.22192	6	0	6	0	6	0	0	6	0	6	0	6	0	6	0	5	6	1	1	6	0	0	4.09	57.0749	5.82	45.3248	6	59.0854	4.01	57.5887	0.6342	FALSE	FALSE	Very Good	Yes	None	None	3356	Zoetis Dog
6592	6592	4892	4892	Wingrave Veterinary Surgery, Epsom	2016-07-27	24	108.571	760	2	2.08219	5	5	4	4	6	4	6	6	1	6	2	4	0	6	4	6	4	3	1	3	4	0	2.78	29.6236	4.84	26.6785	3.95	22.7917	4.26	61.1971	-1.4805	TRUE	FALSE	Very Good	Yes	None	None	4892	Zoetis Dog
6573	6573	2846	2846	Ards Veterinary Clinic	2016-07-26	30	133	931	2	2.55068	6	0	6	0	6	0	0	6	6	6	0	6	0	6	0	6	6	0	0	6	0	0	4.15	58.4932	5.39	34.1909	6	59.0854	4.26	61.1971	0.5957	FALSE	FALSE	Very Good	Yes	None	None	2846	Zoetis Dog
6577	6577	3373	3373	Struthers and Scott	2016-07-26	109	476.571	3336	9	9.13973	6	0	5	0	5	0	0	6	0	5	0	6	0	5	0	5	6	0	1	6	0	0	3.89	55.4219	5.9	54.0042	6	62.3168	3.72	54.7338	0.6199	FALSE	TRUE	Very Good	Yes	None	None	3373	Zoetis Dog
6560	6560	2651	2651	Tweed House Veterinary Surgery	2016-07-25	61	269	1883	5	5.1589	4	6	5	1	6	0	1	6	0	6	0	6	0	6	0	5	5	0	0	5	0	0	3.69	48.2396	5.91	49.6232	5.26	35.5487	4.01	57.5887	-0.0309	TRUE	FALSE	Very Good	Yes	None	None	2651	Zoetis Dog
6556	6556	4875	4875	Cobham Veterinary Centre	2016-07-24	8	36.1429	253	0	0.693151	5	0	6	0	6	0	0	6	6	6	0	6	0	6	0	6	6	0	0	6	0	0	4.07	56.6157	5.39	34.1909	6	59.0854	4.26	61.1971	0.5611	FALSE	FALSE	Very Good	Yes	None	None	4875	Zoetis Dog
6529	6529	4861	4861	Animal House Vets	2016-07-22	4	18.2857	128	0	0.350685	6	0	6	0	6	0	0	6	0	5	0	6	0	6	0	6	6	0	0	6	0	0	4.15	58.4932	6	57.0796	6	59.0854	3.97	56.9781	0.6874	FALSE	FALSE	Very Good	Yes	None	None	4861	Zoetis Dog
6514	6514	4856	4856	Abbey Veterinary Group LTD	2016-07-20	77	334.714	2343	6	6.41918	5	0	5	0	6	0	0	6	6	6	0	6	0	6	0	1	6	0	0	5	1	0	3.9	52.6529	5.39	34.1909	5.88	50.6494	3.03	44.62	0.4034	FALSE	FALSE	Very Good	Yes	None	None	4856	Zoetis Dog
6516	6516	4343	4343	Kingdom Veterinary Clinic	2016-07-20	69	302.714	2119	5	5.80548	6	1	6	1	6	0	0	6	0	5	0	6	0	6	0	5	5	0	0	6	6	0	4.09	57.1005	5.91	49.6232	5.08	33.0809	3.72	53.6039	0.0124	FALSE	FALSE	Very Good	Yes	None	None	4343	Zoetis Dog
6487	6487	4841	4841	The Pet Veterinary Services LLP	2016-07-17	8	37.4286	262	0	0.717808	6	0	4	4	4	0	0	6	4	5	0	5	0	5	3	6	6	0	0	5	0	0	3.55	45.3676	4.96	28.0247	6	59.0854	3.97	56.9781	0.2756	FALSE	FALSE	Very Good	Yes	None	None	4841	Zoetis Dog
6484	6484	4840	4840	Withy Grove Veterinary Clinic	2016-07-16	99	434.571	3042	8	8.33425	6	6	6	0	6	0	0	6	6	6	0	6	0	6	0	6	6	0	0	6	0	0	4.15	59.0676	5.39	42.0851	5.36	41.9696	4.26	62.0292	0.345	FALSE	TRUE	Very Good	Yes	None	None	4840	Zoetis Dog
6457	6457	2690	2690	Stanley House Veterinary Surgeons	2016-07-14	93	405.286	2837	7	7.7726	3	0	5	0	6	2	0	5	0	5	0	6	0	6	0	6	5	0	0	5	1	0	3.67	52.4595	6	60.4527	5.4	42.5752	3.8	55.6821	0.1487	FALSE	TRUE	Very Good	Yes	None	None	2690	Zoetis Dog
6462	6462	4832	4832	Bicester Vets	2016-07-14	51	225.857	1581	4	4.33151	5	0	6	6	6	0	1	6	0	6	0	6	0	6	0	6	6	0	0	6	0	0	4.01	55.1765	5.44	35.1302	6	59.0854	4.26	61.1971	0.5419	FALSE	FALSE	Very Good	Yes	None	None	4832	Zoetis Dog
6450	6450	4158	4158	Myerscough Veterinary Group	2016-07-13	21	93.4286	654	1	1.79178	6	0	6	0	5	0	2	6	2	3	0	6	0	6	0	1	6	1	1	6	0	0	3.89	52.5307	5.62	38.8926	6	59.0854	2.16	33.3397	0.5174	FALSE	FALSE	Good	Yes	None	None	4158	Zoetis Dog
6452	6452	2213	2213	Cedar Grove Veterinary Clinic	2016-07-13	23	101.429	710	1	1.94521	6	0	6	0	6	0	0	6	6	6	0	6	0	6	0	6	6	0	0	6	0	0	4.15	58.4932	5.39	34.1909	6	59.0854	4.26	61.1971	0.5957	FALSE	FALSE	Very Good	Yes	None	None	2213	Zoetis Dog
6455	6455	4829	4829	Bicester Vets	2016-07-13	12	52.7143	369	1	1.01096	6	1	6	0	4	0	2	5	1	3	0	5	0	6	0	4	5	0	0	6	0	1	3.73	49.0198	5.79	44.3018	5.71	44.2786	2.72	40.7738	0.2735	FALSE	FALSE	Very Good	Yes	None	None	4829	Zoetis Dog
6402	6402	4809	4809	Wildbore Veterinary Ltd	2016-07-09	11	49.8571	349	0	0.956164	5	0	6	2	6	0	2	6	0	3	0	6	0	6	1	1	1	0	0	6	0	0	3.65	47.2763	5.73	41.9721	5.51	39.6549	2.16	33.3397	0.092	FALSE	FALSE	Very Good	Yes	None	None	4809	Zoetis Dog
6393	6393	4801	4801	Bush House Vets	2016-07-08	18	80.5714	564	1	1.54521	6	2	5	0	5	0	1	1	1	5	0	5	0	6	0	0	6	1	1	5	1	1	3.69	48.1925	5.61	38.8216	5.22	35.0303	1.62	25.5663	-0.1011	TRUE	FALSE	Very Good	Yes	None	None	4801	Zoetis Dog
6355	6355	4787	4787	Wildbore Veterinary Ltd	2016-07-04	70	306.429	2145	5	5.87671	2	0	3	4	5	0	1	6	0	4	0	4	0	4	3	6	3	1	1	3	0	0	2.57	25.3407	5.19	30.9599	5.7	44.2315	3.68	53.0262	-0.3128	TRUE	FALSE	Very Good	Yes	None	None	4787	Zoetis Dog
6357	6357	4789	4789	Wildbore Veterinary Ltd	2016-07-04	70	307.143	2150	5	5.89041	5	0	4	0	6	0	0	6	0	5	0	5	0	5	6	6	5	0	0	5	0	0	3.56	45.576	5.48	35.7931	5.9	51.7692	3.97	56.9781	0.29	FALSE	FALSE	Very Good	Yes	None	None	4789	Zoetis Dog
6363	6363	3618	3618	Greenwood & Brown	2016-07-04	45	197.286	1381	3	3.78356	4	0	0	2	2	0	1	0	0	6	0	4	0	6	2	2	6	0	0	4	0	0	2.71	28.2026	5.64	39.4748	5.47	38.9282	2.23	34.3797	-0.3464	TRUE	FALSE	Very Good	Yes	None	None	3618	Zoetis Dog
6343	6343	4780	4780	Stanley House Veterinary Surgeons	2016-07-03	12	53	371	1	1.01644	6	0	5	1	6	0	2	6	6	3	0	6	6	6	0	4	6	0	0	6	0	0	3.93	53.4133	4.67	24.8674	6	59.0854	2.9	42.9751	0.3923	FALSE	FALSE	Very Good	Yes	None	None	4780	Zoetis Dog
6349	6349	4783	4783	Eaton Veterinary Practice	2016-07-03	28	125.714	880	2	2.41096	5	1	6	6	6	0	0	6	0	6	0	6	0	6	0	5	6	0	0	6	0	0	4.07	56.6157	5.44	35.1302	5.89	51.3251	4.01	57.5887	0.4956	FALSE	FALSE	Very Good	Yes	None	None	4783	Zoetis Dog
6332	6332	4775	4775	The Sevenoaks Veterinary Surgery	2016-07-02	14	63.5714	445	1	1.21918	4	0	6	3	6	0	2	6	0	5	0	6	0	6	0	5	6	0	0	5	0	0	3.78	50.2347	5.72	41.7924	6	59.0854	3.72	53.6039	0.4881	FALSE	FALSE	Very Good	Yes	None	None	4775	Zoetis Dog
6326	6326	4157	4157	Wildbore Veterinary Ltd	2016-07-01	18	80.8571	566	1	1.55068	6	0	6	0	5	0	0	6	0	4	0	6	0	6	0	5	6	1	1	6	0	0	4.02	55.352	5.82	45.3248	6	59.0854	3.43	49.8001	0.602	FALSE	FALSE	Very Good	Yes	None	None	4157	Zoetis Dog
6327	6327	4771	4771	Donview Vet Centre	2016-07-01	6	26	182	0	0.49863	6	0	6	0	6	0	2	6	1	5	0	6	0	6	0	6	6	0	0	5	0	0	3.95	53.7832	5.9	49.1249	6	59.0854	3.97	56.9781	0.584	FALSE	FALSE	Very Good	Yes	None	None	4771	Zoetis Dog
6303	6303	3907	3907	Pennard Vets	2016-06-30	100	439	3073	8	8.41918	5	1	3	1	5	2	1	5	0	4	1	5	1	4	1	3	3	0	1	6	0	1	3.2	46.4217	5.51	43.8818	5.09	38.4848	2.77	42.937	-0.259	TRUE	TRUE	Very Good	Yes	None	None	3907	Zoetis Dog
6307	6307	4760	4760	Chertsey Vets	2016-06-30	11	52.1429	365	0	1	6	0	6	0	6	0	0	6	6	6	0	6	0	6	0	6	6	0	0	6	0	0	4.15	58.4932	5.39	34.1909	6	59.0854	4.26	61.1971	0.5957	FALSE	FALSE	Very Good	Yes	None	None	4760	Zoetis Dog
6264	6264	4739	4739	Bush House Vets	2016-06-28	15	68.1429	477	1	1.30685	4	0	6	2	5	0	0	6	0	6	0	6	0	6	0	0	4	0	0	5	0	0	3.72	48.7592	5.81	45.09	5.8	47.3945	2.78	41.4952	0.3377	FALSE	FALSE	Very Good	Yes	None	None	4739	Zoetis Dog
6276	6276	4748	4748	Bush House Vets	2016-06-28	6	28	196	0	0.536986	4	5	5	0	5	0	3	6	0	3	0	5	0	6	0	4	6	0	0	5	0	0	3.46	43.4337	6	57.0796	5.47	38.8668	2.9	42.9751	0.0259	FALSE	FALSE	Very Good	Yes	None	None	4748	Zoetis Dog
6205	6205	4199	4199	Wingrave Veterinary Surgery, Horton	2016-06-22	10	45.4286	318	0	0.871233	5	0	5	0	5	0	1	6	0	4	0	6	0	6	0	1	6	0	0	5	0	0	3.76	49.6377	6	57.0796	6	59.0854	2.45	37.2077	0.5183	FALSE	FALSE	Very Good	Yes	None	None	4199	Zoetis Dog
6206	6206	4200	4200	Wingrave Veterinary Surgery, Horton	2016-06-22	20	88.8571	622	1	1.70411	5	0	5	1	5	0	1	6	0	4	0	5	0	5	1	5	5	0	0	5	0	0	3.52	44.6977	5.82	45.3248	5.9	51.7692	3.43	49.8001	0.3236	FALSE	FALSE	Very Good	Yes	None	None	4200	Zoetis Dog
6187	6187	2675	2675	Cedar Grove Veterinary Clinic	2016-06-20	141	614.571	4302	11	11.7863	6	0	6	0	6	5	1	6	6	6	2	5	2	6	0	4	6	0	0	5	1	2	3.92	55.8027	4.97	37.2606	4.89	36.3989	3.77	55.2928	-0.0487	TRUE	TRUE	Very Good	Yes	None	None	2675	Zoetis Dog
6190	6190	4704	4704	Brislington Veterinary Surgery	2016-06-20	62	272.429	1907	5	5.22466	4	2	4	2	5	4	2	2	5	4	4	5	2	5	2	4	4	2	2	4	4	1	3.02	34.4478	4.46	22.8189	3.66	20.7193	2.49	37.8158	-1.6334	TRUE	FALSE	Good	Yes	None	None	4704	Zoetis Dog
6169	6169	3530	3530	Ashworth Veterinary Group	2016-06-19	14	61.4286	430	1	1.17808	4	0	4	0	5	0	0	5	0	5	0	5	0	5	0	5	5	0	0	5	0	0	3.41	42.3368	6	57.0796	5.81	47.77	3.55	51.3141	0.2413	FALSE	FALSE	Very Good	Yes	None	None	3530	Zoetis Dog
6176	6176	3677	3677	Pennine Vets	2016-06-19	24	104.857	734	2	2.01096	5	0	6	0	6	0	0	5	0	4	0	5	0	5	0	5	5	0	0	5	0	0	3.76	49.6615	6	57.0796	5.81	47.77	3.26	47.5792	0.3905	FALSE	FALSE	Good	Yes	None	None	3677	Zoetis Dog
6177	6177	4695	4695	Glenn Veterinary Clinic	2016-06-19	31	136.714	957	2	2.62192	4	1	6	2	5	1	1	6	6	5	1	5	1	6	1	2	4	2	0	4	0	1	3.36	41.4038	4.76	25.7218	5.42	38.0946	2.98	44.0719	-0.2335	TRUE	FALSE	Good	Yes	None	None	4695	Zoetis Dog
6178	6178	4696	4696	Glenn Veterinary Clinic	2016-06-19	31	136.714	957	2	2.62192	4	4	6	1	5	5	1	5	1	3	1	6	1	6	1	3	5	1	1	5	1	1	3.65	47.3934	5.33	33.1438	4.41	26.3986	2.48	37.599	-0.7222	TRUE	FALSE	Good	Yes	None	None	4696	Zoetis Dog
6162	6162	1846	1846	Willows Veterinary Centre	2016-06-18	28	125.714	880	2	2.41096	6	0	6	0	6	0	0	6	0	6	0	6	0	6	0	6	6	0	0	6	0	0	4.15	58.4932	6	57.0796	6	59.0854	4.26	61.1971	0.6874	FALSE	FALSE	Very Good	Yes	None	None	1846	Zoetis Dog
6168	6168	4694	4694	Charter Vets Biddulph	2016-06-18	15	65.4286	458	1	1.25479	6	0	6	0	6	0	0	6	0	6	0	6	0	6	0	6	6	0	0	6	0	0	4.15	58.4932	6	57.0796	6	59.0854	4.26	61.1971	0.6874	FALSE	FALSE	Very Good	Yes	None	None	4694	Zoetis Dog
6153	6153	4684	4684	Tender Paws vets	2016-06-16	91	399.571	2797	7	7.66301	4	0	6	0	6	0	0	6	0	0	0	6	0	6	6	6	6	0	0	6	0	0	3.99	56.7571	5.48	43.3708	6	62.3168	2.52	39.8973	0.6644	FALSE	TRUE	Very Good	Yes	None	None	4684	Zoetis Dog
6119	6119	4089	4089	Strathmore Vets	2016-06-15	10	44.7143	313	0	0.857534	6	0	6	0	6	0	1	6	0	6	0	6	0	6	0	5	0	0	0	6	0	0	3.73	49.0672	6	57.0796	5.41	37.8657	4.01	57.5887	0.1016	FALSE	FALSE	Very Good	Yes	None	None	4089	Zoetis Dog
6123	6123	4662	4662	Brislington Veterinary Surgery	2016-06-15	104	454.571	3182	8	8.71781	4	1	5	1	4	1	0	1	4	2	1	4	1	4	1	2	5	3	3	5	1	1	3.07	44.7749	4.67	34.5454	4.96	37.0742	1.25	21.628	-0.3993	TRUE	TRUE	Very Good	Yes	None	None	4662	Zoetis Dog
6125	6125	4664	4664	Brislington Veterinary Surgery	2016-06-15	104	454.571	3182	8	8.71781	5	1	1	1	3	0	1	5	1	1	1	5	0	6	1	0	5	2	1	6	1	0	3.03	44.2456	5.46	43.1239	5.46	43.5429	1.16	19.9789	-0.1109	TRUE	TRUE	Very Good	Yes	None	None	4664	Zoetis Dog
6087	6087	2119	2119	Eaton Veterinary Practice	2016-06-14	17	76.8571	538	1	1.47397	5	0	6	0	6	0	0	6	0	4	0	6	0	6	0	6	6	0	0	6	0	0	4.07	56.6157	6	57.0796	6	59.0854	3.68	53.0262	0.6528	FALSE	FALSE	Very Good	Yes	None	None	2119	Zoetis Dog
6025	6025	4137	4137	Batchelor, Davidson and Watson Ltd	2016-06-11	11	48.5714	340	0	0.931507	6	0	5	1	6	0	4	6	6	4	0	5	0	6	1	5	6	0	0	6	0	0	3.72	48.7592	5.21	31.3099	6	59.0854	3.43	49.8001	0.382	FALSE	FALSE	Very Good	Yes	None	None	4137	Zoetis Dog
6028	6028	3931	3931	Glenn Veterinary Clinic	2016-06-11	5	26	182	0	0.49863	6	0	6	0	6	0	0	6	6	6	0	6	0	6	0	6	6	0	0	6	0	0	4.15	58.4932	5.39	34.1909	6	59.0854	4.26	61.1971	0.5957	FALSE	FALSE	Very Good	Yes	None	None	3931	Zoetis Dog
6031	6031	2106	2106	Milford Veterinary Hospital	2016-06-11	16	70.2857	492	1	1.34795	5	1	5	1	4	2	1	5	1	1	5	5	1	5	1	4	5	2	1	6	2	0	3.4	42.2684	5.36	33.5972	4.54	27.5588	2.14	33.1574	-0.7317	TRUE	FALSE	Good	Yes	None	None	2106	Zoetis Dog
6019	6019	2409	2409	Barton Lodge Veterinary Centre	2016-06-10	203	886.714	6207	16	17.0055	5	0	4	1	5	0	0	6	0	6	0	1	0	5	0	6	4	0	0	4	0	0	3	43.8556	5.91	54.4691	5.8	51.5262	4.26	62.0292	0.0861	FALSE	TRUE	Good	Yes	None	None	2409	Zoetis Dog
6021	6021	4153	4153	The Mount Vet Practice	2016-06-10	12	55.2857	387	1	1.06027	6	0	6	0	6	0	0	6	0	6	0	6	0	6	0	6	6	0	0	6	0	0	4.15	58.4932	6	57.0796	6	59.0854	4.26	61.1971	0.6874	FALSE	FALSE	Very Good	Yes	None	None	4153	Zoetis Dog
6012	6012	4604	4604	0	2016-06-09	114	499.429	3496	9	9.57808	5	0	5	1	6	0	1	6	0	6	0	6	0	6	0	6	5	0	0	5	0	0	3.77	53.7703	5.91	54.4691	5.9	55.564	4.26	62.0292	0.5031	FALSE	TRUE	Very Good	Yes	None	None	4604	Zoetis Dog
5998	5998	4597	4597	Ashworth Veterinary Group	2016-06-08	26	116.429	815	2	2.23288	5	0	6	0	5	0	1	5	0	5	0	6	0	6	0	5	6	0	0	5	0	0	3.85	51.7279	6	57.0796	5.91	52.3265	3.55	51.3141	0.4988	FALSE	FALSE	Very Good	Yes	None	None	4597	Zoetis Dog
5993	5993	3051	3051	Milan Veterinary Practice	2016-06-07	14	61	427	1	1.16986	6	0	6	0	6	0	0	6	0	4	0	6	0	6	0	6	6	0	0	6	0	0	4.15	58.4932	6	57.0796	6	59.0854	3.68	53.0262	0.6874	FALSE	FALSE	Very Good	Yes	None	None	3051	Zoetis Dog
5957	5957	4582	4582	My Pets Vets Ltd	2016-06-03	4	19.7143	138	0	0.378082	5	4	4	4	3	0	5	6	2	6	0	5	0	6	0	6	6	1	1	6	0	0	3.19	37.8352	5.25	31.8178	5.57	40.9897	4.26	61.1971	-0.1315	TRUE	FALSE	Very Good	Yes	None	None	4582	Zoetis Dog
5963	5963	4584	4584	Abbey Veterinary Group LTD	2016-06-03	27	121.429	850	2	2.32877	6	0	6	0	6	0	0	6	0	4	0	6	0	6	0	5	6	0	0	6	6	0	4.15	58.4932	6	57.0796	5.28	35.8151	3.43	49.8001	0.1928	FALSE	FALSE	Very Good	Yes	None	None	4584	Zoetis Dog
5933	5933	4572	4572	Taylor Veterinary Practice	2016-05-31	17	74.1429	519	1	1.42192	6	0	6	0	6	0	3	3	6	6	6	6	0	6	0	6	6	0	0	6	0	0	3.96	54.1545	5.39	34.1909	4.98	31.9057	3.74	53.8272	-0.1894	TRUE	FALSE	Very Good	Yes	None	None	4572	Zoetis Dog
5920	5920	3464	3464	Bredy Veterinary Centre	2016-05-30	147	643.143	4502	12	12.3342	3	3	3	3	3	3	3	3	3	3	3	3	3	3	3	3	3	3	3	3	3	3	2.08	31.949	3.99	29.7477	3.94	28.7496	2.13	34.9134	-1.485	TRUE	TRUE	Very Good	Yes	None	None	3464	Zoetis Dog
5915	5915	1199	1199	Castle Vet Clinic, Dorchester	2016-05-29	45	195.714	1370	3	3.75342	4	0	6	0	6	0	1	6	0	3	0	6	0	5	0	4	5	0	0	6	0	0	3.78	50.1629	6	57.0796	5.9	51.7692	2.9	42.9751	0.4611	FALSE	FALSE	Very Good	Yes	None	None	1199	Zoetis Dog
5897	5897	4061	4061	Wallace Veterinary Centre	2016-05-27	102	447.143	3130	8	8.57534	5	5	5	2	5	1	1	5	5	6	1	5	2	5	5	5	4	1	1	5	1	1	3.4	48.9393	4.38	32.3676	4.79	35.3905	3.84	56.2482	-0.3532	TRUE	TRUE	Very Good	Yes	None	None	4061	Zoetis Dog
5880	5880	4557	4557	Croft Veterinary Centre	2016-05-25	23	101.286	709	1	1.94247	4	0	6	0	6	0	0	6	0	5	0	6	0	6	0	6	6	0	0	5	0	0	3.91	52.9956	6	57.0796	6	59.0854	3.97	56.9781	0.5841	FALSE	FALSE	Very Good	Yes	None	None	4557	Zoetis Dog
5881	5881	3568	3568	Greenwood & Brown	2016-05-25	64	281	1967	5	5.38904	5	0	6	0	5	0	2	6	1	5	0	6	0	6	0	6	6	0	0	6	0	1	3.87	52.0921	5.79	44.3018	6	59.0854	3.97	56.9781	0.5356	FALSE	FALSE	Very Good	Yes	None	None	3568	Zoetis Dog
5864	5864	4546	4546	Bridge Vets	2016-05-23	26	114	798	2	2.1863	6	0	6	0	6	0	0	6	0	6	0	6	0	6	0	6	6	0	0	6	0	0	4.15	58.4932	6	57.0796	6	59.0854	4.26	61.1971	0.6874	FALSE	FALSE	Very Good	Yes	None	None	4546	Zoetis Dog
5839	5839	4536	4536	Abbey Veterinary Group Ltd	2016-05-20	39	172.286	1206	3	3.30411	6	0	6	0	4	0	0	5	0	5	0	6	0	6	0	3	5	0	0	5	0	0	3.86	51.922	6	57.0796	5.81	47.77	3.06	44.9996	0.435	FALSE	FALSE	Very Good	Yes	None	None	4536	Zoetis Dog
5824	5824	4530	4530	Anrich Vets (Wigan)	2016-05-19	27	121.143	848	2	2.32329	4	0	4	0	6	0	0	6	0	6	0	6	0	6	0	6	6	0	0	3	0	0	3.56	45.437	6	57.0796	6	59.0854	4.26	61.1971	0.4334	FALSE	FALSE	Very Good	Yes	None	None	4530	Zoetis Dog
5825	5825	4531	4531	Anrich Vets (Wigan)	2016-05-19	28	124.143	869	2	2.38082	5	0	4	0	5	0	0	6	0	3	0	5	0	5	0	6	5	0	0	4	0	0	3.41	42.3596	6	57.0796	5.9	51.7692	3.39	49.2421	0.3024	FALSE	FALSE	Very Good	Yes	None	None	4531	Zoetis Dog
5793	5793	3829	3829	Bridge Vets	2016-05-16	6	27.7143	194	0	0.531507	6	1	0	1	6	0	1	0	0	6	0	6	0	6	0	6	6	0	0	6	0	0	3.51	44.4442	5.91	49.6232	5.36	37.094	3.22	47.0702	-0.0383	TRUE	FALSE	Very Good	Yes	None	None	3829	Zoetis Dog
5784	5784	4515	4515	Milton Keynes Vet Group	2016-05-14	29	127.143	890	2	2.43836	6	0	6	0	6	0	0	6	6	6	0	6	0	6	0	6	6	0	0	6	0	0	4.15	58.4932	5.39	34.1909	6	59.0854	4.26	61.1971	0.5957	FALSE	FALSE	Very Good	Yes	None	None	4515	Zoetis Dog
5785	5785	1604	1604	Castle Vet Clinic, Dorchester	2016-05-14	65	284.429	1991	5	5.45479	5	5	6	1	6	0	2	5	6	6	0	6	0	6	0	6	6	0	0	6	0	0	3.95	53.7585	5.3	32.6355	5.38	37.3373	4.09	58.6366	0.0661	FALSE	FALSE	Very Good	Yes	None	None	1604	Zoetis Dog
5777	5777	4512	4512	Ashgrove Veterinary Centre Ltd	2016-05-13	13	59.8571	419	1	1.14795	4	1	4	1	6	0	0	6	0	6	0	0	0	6	0	6	6	0	0	6	0	0	3.27	39.5473	5.91	49.6232	5.89	51.3251	4.26	61.1971	0.2239	FALSE	FALSE	Very Good	Yes	None	None	4512	Zoetis Dog
5778	5778	4513	4513	Ashgrove Veterinary Centre Ltd	2016-05-13	9	42.4286	297	0	0.813699	6	0	6	0	6	0	0	6	0	6	0	6	0	6	0	6	6	0	0	6	0	0	4.15	58.4932	6	57.0796	6	59.0854	4.26	61.1971	0.6874	FALSE	FALSE	Very Good	Yes	None	None	4513	Zoetis Dog
5760	5760	4499	4499	St. Anne's Veterinary Group	2016-05-12	51	223.143	1562	4	4.27945	5	0	4	0	6	0	2	6	0	6	0	6	0	6	0	6	6	0	0	6	0	0	3.75	49.5424	6	57.0796	6	59.0854	4.26	61.1971	0.5164	FALSE	FALSE	Very Good	Yes	None	None	4499	Zoetis Dog
5724	5724	4477	4477	Stanley House Veterinary Surgeons	2016-05-10	43	190.286	1332	3	3.64932	6	0	6	0	6	0	0	6	6	4	0	5	0	6	0	6	6	0	0	6	0	0	4.07	56.4631	5.39	34.1909	6	59.0854	3.68	53.0262	0.5583	FALSE	FALSE	Good	Yes	None	None	4477	Zoetis Dog
5725	5725	3974	3974	Abbey Veterinary Group LTD	2016-05-10	5	23.7143	166	0	0.454795	5	1	6	1	6	0	2	6	5	2	0	6	0	6	0	5	6	1	0	5	0	0	3.8	50.6663	5.32	33.0267	5.89	51.3251	2.85	42.4261	0.3634	FALSE	FALSE	Good	Yes	None	None	3974	Zoetis Dog
5734	5734	4483	4483	Greenwood & Brown	2016-05-10	14	62.1429	435	1	1.19178	6	0	6	0	6	0	6	6	0	6	0	6	0	6	0	6	6	0	0	6	0	0	3.77	49.9955	6	57.0796	6	59.0854	4.26	61.1971	0.5254	FALSE	FALSE	Very Good	Yes	None	None	4483	Zoetis Dog
5689	5689	4466	4466	Croft Veterinary Centre	2016-05-05	95	416.286	2914	7	7.98356	6	5	6	0	4	0	3	5	4	2	0	6	0	6	1	4	6	2	2	6	0	0	3.69	52.679	5.15	39.043	5.38	42.2436	2.43	38.813	0.143	FALSE	TRUE	Very Good	Yes	None	None	4466	Zoetis Dog
5677	5677	4460	4460	The Pet Vet	2016-05-03	21	93.8571	657	1	1.8	6	0	4	1	6	0	0	6	6	6	0	6	0	6	0	4	6	0	0	5	0	0	3.88	52.3112	5.3	32.6355	6	59.0854	3.77	54.1857	0.4652	FALSE	FALSE	Very Good	Yes	None	None	4460	Zoetis Dog
5671	5671	3913	3913	Hadrian Vets	2016-05-02	49	217.286	1521	4	4.16712	6	0	6	0	6	0	0	6	0	5	0	6	0	6	0	6	6	0	0	6	0	0	4.15	58.4932	6	57.0796	6	59.0854	3.97	56.9781	0.6874	FALSE	FALSE	Very Good	Yes	None	None	3913	Zoetis Dog
5648	5648	4448	4448	Greenwood & Brown	2016-04-29	8	37.8571	265	0	0.726027	5	0	4	0	6	0	0	6	0	6	0	6	0	6	0	6	6	0	0	6	0	0	3.88	52.2868	6	57.0796	6	59.0854	4.26	61.1971	0.5704	FALSE	FALSE	Very Good	Yes	None	None	4448	Zoetis Dog
5640	5640	4442	4442	Taylor Veterinary Practice	2016-04-28	3	16.2857	114	0	0.312329	6	0	6	0	5	0	0	6	0	5	0	6	0	6	0	6	6	0	0	6	0	0	4.08	56.743	6	57.0796	6	59.0854	3.97	56.9781	0.6552	FALSE	FALSE	Very Good	Yes	None	None	4442	Zoetis Dog
5601	5601	3203	3203	Abbey Veterinary Group Ltd	2016-04-25	40	176.429	1235	3	3.38356	4	0	3	4	5	0	3	6	1	6	0	5	0	4	2	6	4	1	0	3	0	0	2.75	29.0829	5.28	32.2765	5.8	47.3945	4.26	61.1971	-0.1538	TRUE	FALSE	Very Good	Yes	None	None	3203	Zoetis Dog
5602	5602	4422	4422	Wildbore Veterinary Ltd	2016-04-25	10	46.4286	325	0	0.890411	5	0	6	0	6	0	2	6	0	6	0	6	0	6	0	6	6	0	0	6	0	0	3.95	53.7585	6	57.0796	6	59.0854	4.26	61.1971	0.5988	FALSE	FALSE	Very Good	Yes	None	None	4422	Zoetis Dog
5596	5596	4419	4419	Abbey Veterinary Group Ltd	2016-04-24	28	123.857	867	2	2.37534	6	0	6	0	6	0	0	6	0	3	0	6	0	6	0	6	6	2	0	6	6	6	4.03	55.6789	5.22	31.4353	5.28	35.8151	3.39	49.2421	0.0232	FALSE	FALSE	Good	Yes	None	None	4419	Zoetis Dog
5585	5585	4415	4415	Anrich Vets (Wigan)	2016-04-23	82	357.571	2503	6	6.85753	4	0	6	1	4	0	1	0	0	6	0	6	0	6	0	6	6	0	0	6	0	0	3.78	53.8297	5.91	54.4691	5.47	43.7119	3.22	48.4563	0.2394	FALSE	TRUE	Good	Yes	None	None	4415	Zoetis Dog
5574	5574	3785	3785	Wallace Veterinary Centre	2016-04-22	7	34	238	0	0.652055	5	0	6	0	6	0	0	6	0	5	0	6	0	6	0	5	6	0	0	5	0	0	3.99	54.8013	6	57.0796	6	59.0854	3.72	53.6039	0.6187	FALSE	FALSE	Very Good	Yes	None	None	3785	Zoetis Dog
5535	5535	4393	4393	Withy Grove Veterinary Clinic	2016-04-18	31	138.143	967	2	2.64932	6	0	6	0	6	0	0	0	0	3	0	6	0	6	0	3	5	0	0	6	0	0	4.09	57.1005	6	57.0796	5.37	37.2286	1.61	25.3557	0.2302	FALSE	FALSE	Very Good	Yes	None	None	4393	Zoetis Dog
5482	5482	4373	4373	Kingdom Veterinary Clinic	2016-04-13	80	351.857	2463	6	6.74795	6	0	4	0	6	1	0	6	0	3	0	5	0	5	0	6	6	0	0	6	0	0	3.79	53.9487	6	60.4527	5.85	53.3854	3.39	50.5431	0.4795	FALSE	TRUE	Very Good	Yes	None	None	4373	Zoetis Dog
5483	5483	4374	4374	Kingdom Veterinary Clinic	2016-04-13	55	240.571	1684	4	4.6137	6	0	5	0	6	0	0	6	0	6	0	6	0	5	0	6	6	0	0	6	0	0	3.97	54.3034	6	57.0796	6	59.0854	4.26	61.1971	0.6092	FALSE	FALSE	Very Good	Yes	None	None	4374	Zoetis Dog
5484	5484	4375	4375	Kingdom Veterinary Clinic	2016-04-13	73	319.286	2235	6	6.12329	6	0	6	0	6	0	0	6	6	6	0	6	0	6	0	6	6	0	0	6	0	0	4.15	58.4932	5.39	34.1909	6	59.0854	4.26	61.1971	0.5957	FALSE	FALSE	Very Good	Yes	None	None	4375	Zoetis Dog
5488	5488	1095	1095	Irving Veterinary Surgery	2016-04-13	84	367	2569	7	7.03836	6	1	5	0	5	1	2	6	0	5	0	4	2	3	2	5	4	0	5	4	0	0	3.14	45.6255	5.1	38.5631	5.55	45.1574	3.72	54.7338	-0.0049	TRUE	TRUE	Good	Yes	None	None	1095	Zoetis Dog
5470	5470	3761	3761	Abbey Veterinary Group LTD	2016-04-12	6	27.7143	194	0	0.531507	5	0	5	1	5	0	1	5	1	1	0	5	1	6	1	5	6	1	1	5	0	1	3.61	46.4821	5.33	33.1438	5.91	52.3265	2.39	36.4647	0.2932	FALSE	FALSE	Very Good	Yes	None	None	3761	Zoetis Dog
5477	5477	3355	3355	Myerscough Veterinary Group	2016-04-12	43	190.571	1334	3	3.65479	4	1	1	1	5	1	3	5	5	5	1	5	1	5	1	5	3	1	1	4	1	1	2.67	27.3199	4.92	27.5869	5.12	33.5976	3.55	51.3141	-0.7153	TRUE	FALSE	Good	Yes	None	None	3355	Zoetis Dog
5478	5478	3357	3357	Myerscough Veterinary Group	2016-04-12	77	336.714	2357	6	6.45753	5	1	5	1	5	1	1	5	1	5	1	1	1	5	1	5	5	1	1	4	1	1	3.03	44.2595	5.33	41.2448	5.31	41.2978	3.55	52.5338	-0.2007	TRUE	TRUE	Good	Yes	None	None	3357	Zoetis Dog
5465	5465	4365	4365	Stanley House Veterinary Surgeons	2016-04-11	19	83.4286	584	1	1.6	4	0	5	0	4	0	4	4	1	2	0	0	3	3	0	4	5	0	0	4	0	0	2.48	23.5514	5.59	38.1319	5.72	44.8097	2.26	34.7382	-0.276	TRUE	FALSE	Good	Yes	None	None	4365	Zoetis Dog
5444	5444	4357	4357	Abbey Veterinary Group Ltd	2016-04-10	137	596.857	4178	11	11.4466	5	1	4	1	4	0	1	5	1	6	0	4	0	4	1	5	5	0	0	3	0	0	3.02	44.0785	5.72	48.1139	5.71	48.6503	3.84	56.2482	0.0348	FALSE	TRUE	Very Good	Yes	None	None	4357	Zoetis Dog
5451	5451	4359	4359	Animal Trust	2016-04-10	17	77.1429	540	1	1.47945	4	0	6	1	5	0	3	6	0	4	0	6	0	6	0	6	6	0	0	6	0	0	3.73	48.9724	5.91	49.6232	6	59.0854	3.68	53.0262	0.491	FALSE	FALSE	Very Good	Yes	None	None	4359	Zoetis Dog
5402	5402	1395	1395	Donview Vet Centre	2016-04-06	22	95.7143	670	1	1.83562	5	0	6	1	5	0	2	6	1	6	0	6	0	6	0	6	6	1	0	6	0	0	3.81	50.7624	5.73	42.0174	6	59.0854	4.26	61.1971	0.4996	FALSE	FALSE	Very Good	Yes	None	None	1395	Zoetis Dog
5373	5373	4322	4322	Wingrave Veterinary Surgery, Sutton	2016-04-03	5	25.8571	181	0	0.49589	5	0	6	0	6	0	5	6	0	3	0	6	0	6	0	3	6	0	0	6	0	0	3.76	49.6139	6	57.0796	6	59.0854	2.65	39.8365	0.5178	FALSE	FALSE	Very Good	Yes	None	None	4322	Zoetis Dog
5375	5375	4323	4323	Milan Veterinary Practice	2016-04-03	3	16	112	0	0.306849	4	2	5	3	6	0	4	6	0	4	0	5	1	6	1	6	5	0	0	5	0	0	3.41	42.4508	5.53	36.8815	5.69	43.7702	3.68	53.0262	0.087	FALSE	FALSE	Very Good	Yes	None	None	4323	Zoetis Dog
5362	5362	3675	3675	Wallace Veterinary Centre	2016-04-02	26	114	798	2	2.1863	6	1	6	0	3	0	3	2	2	1	0	6	0	6	0	0	6	4	5	6	0	0	3.49	44.0762	4.97	28.1788	5.54	40.2877	0.64	4.9982	-0.065	TRUE	FALSE	Good	Yes	None	None	3675	Zoetis Dog
5353	5353	4310	4310	University of Bristol Canine Osteoarthritis Resear	2016-04-01	76	330.429	2313	6	6.33699	6	0	6	0	4	0	0	0	1	2	0	6	0	6	0	4	6	0	0	6	0	0	4	56.9124	5.9	54.0693	5.47	43.7119	1.57	26.9288	0.3432	FALSE	TRUE	Good	Yes	None	None	4310	Zoetis Dog
5312	5312	1807	1807	Cockburn Veterinary Group	2016-03-28	75	327.143	2290	6	6.27397	5	0	5	3	5	0	2	5	0	5	0	5	0	6	0	4	5	0	0	5	0	0	3.55	50.7933	5.72	48.1852	5.81	51.8728	3.3	49.4764	0.3444	FALSE	TRUE	Very Good	Yes	None	None	1807	Zoetis Dog
5301	5301	4274	4274	The Swanscombe Veterinary Surgery	2016-03-27	52	229.714	1608	4	4.40548	6	0	2	1	5	0	2	3	0	6	0	6	0	5	1	6	6	1	1	6	0	0	3.42	42.5192	5.64	39.4748	5.74	45.1096	3.74	53.8272	0.137	FALSE	FALSE	Good	Yes	None	None	4274	Zoetis Dog
5289	5289	3634	3634	Cedar Grove Veterinary Clinic	2016-03-26	6	27.8571	195	0	0.534247	5	1	6	2	6	1	4	5	5	5	1	5	0	6	3	5	5	1	0	6	0	0	3.61	46.5287	4.97	28.1102	5.43	38.2689	3.55	51.3141	-0.0889	TRUE	FALSE	Very Good	Yes	None	None	3634	Zoetis Dog
5292	5292	4269	4269	Wingrave Veterinary Surgery, Sutton	2016-03-26	9	39.8571	279	0	0.764384	6	0	6	0	5	0	0	6	0	5	0	6	0	6	0	5	6	0	0	6	0	5	4.08	56.743	5.48	35.8214	6	59.0854	3.72	53.6039	0.5766	FALSE	FALSE	Very Good	Yes	None	None	4269	Zoetis Dog
5273	5273	3529	3529	Animal Trust	2016-03-25	166	725	5075	13	13.9041	5	2	5	1	5	1	1	1	0	5	0	4	0	5	0	5	4	0	0	5	1	1	3.37	48.5997	5.8	50.465	4.88	36.2837	2.86	44.0349	-0.308	TRUE	TRUE	Good	Yes	None	None	3529	Zoetis Dog
5274	5274	4261	4261	Animal Trust	2016-03-25	168	730.571	5114	14	14.011	6	0	6	0	5	0	0	5	0	5	0	5	0	6	1	5	5	0	0	5	0	0	3.85	54.8169	5.91	54.7453	5.81	51.8728	3.55	52.5338	0.4845	FALSE	TRUE	Very Good	Yes	None	None	4261	Zoetis Dog
5276	5276	4263	4263	Animal Trust	2016-03-25	63	275.143	1926	5	5.27671	6	5	6	0	6	1	0	5	0	5	0	6	0	6	0	5	6	0	0	6	0	0	4.15	58.4932	6	57.0796	5.23	35.1232	3.55	51.3141	0.1596	FALSE	FALSE	Very Good	Yes	None	None	4263	Zoetis Dog
5263	5263	4255	4255	Abbey Veterinary Group LTD	2016-03-24	6	26.4286	185	0	0.506849	6	5	6	6	6	0	2	5	1	5	0	6	0	6	0	1	5	0	0	6	1	0	3.97	54.2289	5.34	33.333	5.16	34.1543	2.56	38.7223	-0.0684	TRUE	FALSE	Very Good	Yes	None	None	4255	Zoetis Dog
5229	5229	3202	3202	The Forest Vet	2016-03-20	134	585.143	4096	11	11.2219	4	4	5	2	5	3	4	3	1	4	2	3	1	5	2	2	4	3	2	3	2	1	2.67	39.7598	4.89	36.4948	4.18	30.428	2.17	35.4827	-1.0642	TRUE	TRUE	Good	Yes	None	None	3202	Zoetis Dog
5219	5219	3610	3610	Bicester Vets	2016-03-19	103	450.571	3154	8	8.6411	6	0	6	0	6	0	0	6	0	6	0	6	0	6	0	6	6	0	0	6	0	6	4.15	59.0676	5.37	41.8445	6	62.3168	4.26	62.0292	0.739	FALSE	TRUE	Very Good	Yes	None	None	3610	Zoetis Dog
5211	5211	3102	3102	Knutsford Veterinary Surgery	2016-03-18	48	210.857	1476	4	4.04384	5	0	5	1	6	0	0	6	0	6	0	6	0	6	0	6	5	0	0	6	0	0	3.92	53.0937	5.91	49.6232	5.9	51.7692	4.26	61.1971	0.5045	FALSE	FALSE	Very Good	Yes	None	None	3102	Zoetis Dog
5212	5212	4227	4227	Wallace Veterinary Centre	2016-03-18	35	154.286	1080	2	2.9589	5	1	5	1	5	0	4	5	1	6	0	5	1	5	2	5	5	0	0	5	0	0	3.33	40.7912	5.53	36.8204	5.71	44.2786	3.84	55.1801	0.0645	FALSE	FALSE	Very Good	Yes	None	None	4227	Zoetis Dog
5174	5174	4205	4205	Greenwood & Brown	2016-03-16	83	363.571	2545	6	6.9726	4	4	6	6	5	4	5	4	2	4	3	5	0	5	1	1	1	1	1	4	3	3	2.9	42.6715	4.66	34.4994	3.58	26.355	2.1	34.5164	-1.3272	TRUE	TRUE	Very Good	Yes	None	None	4205	Zoetis Dog
5180	5180	2798	2798	Bredy Veterinary Centre	2016-03-16	36	156.714	1097	3	3.00548	5	1	6	2	4	0	1	6	1	3	0	5	0	6	1	4	4	1	1	5	0	1	3.51	44.4212	5.34	33.333	5.7	43.9986	2.9	42.9751	0.105	FALSE	FALSE	Good	Yes	None	None	2798	Zoetis Dog
5187	5187	4215	4215	Fareham Creek Veterinary Surgery	2016-03-16	56	245.714	1720	4	4.71233	6	0	5	0	6	0	2	6	0	5	0	6	0	5	0	5	6	0	0	6	0	0	3.84	51.51	6	57.0796	6	59.0854	3.72	53.6039	0.5552	FALSE	FALSE	Good	Yes	None	None	4215	Zoetis Dog
5189	5189	4218	4218	ICR Butt & Partners	2016-03-16	11	50.7143	355	0	0.972603	6	0	6	0	6	0	0	6	0	6	0	6	0	6	0	6	6	0	0	6	0	0	4.15	58.4932	6	57.0796	6	59.0854	4.26	61.1971	0.6874	FALSE	FALSE	Very Good	Yes	None	None	4218	Zoetis Dog
5143	5143	4185	4185	Charter Vets Biddulph	2016-03-14	67	291.857	2043	5	5.59726	5	6	6	6	6	6	6	6	6	6	6	6	6	6	6	6	6	1	1	1	0	0	3.23	38.7354	3.51	15.1263	3.72	21.1208	4.26	61.1971	-1.6477	TRUE	FALSE	Very Good	Yes	None	None	4185	Zoetis Dog
5146	5146	4186	4186	Stanley House Veterinary Surgeons	2016-03-14	76	334.143	2339	6	6.40822	6	5	5	5	5	3	6	6	6	6	6	6	0	6	0	0	6	0	0	6	4	0	3.6	51.5143	4.93	36.8123	3.79	27.7163	2.78	43.0999	-0.8778	TRUE	TRUE	Very Good	Yes	None	None	4186	Zoetis Dog
5154	5154	4191	4191	Shrubbery Veterinary Surgery	2016-03-14	10	46.7143	327	0	0.89589	6	0	6	0	6	0	2	1	6	6	0	6	0	6	0	5	6	0	0	5	0	0	3.95	53.7832	5.39	34.1909	5.56	40.669	3.15	46.1393	0.2042	FALSE	FALSE	Very Good	Yes	None	None	4191	Zoetis Dog
5136	5136	4181	4181	Greenwood & Brown	2016-03-13	4	18.4286	129	0	0.353425	6	0	6	6	6	0	0	6	0	0	0	6	0	6	0	6	6	0	0	6	0	0	4.15	58.4932	5.44	35.1302	6	59.0854	2.52	38.1619	0.6035	FALSE	FALSE	Very Good	Yes	None	None	4181	Zoetis Dog
5113	5113	2081	2081	Charter Vets Congleton	2016-03-10	97	425.857	2981	8	8.16712	6	0	5	0	5	0	0	6	0	4	0	6	0	6	0	5	5	0	0	6	0	0	3.92	55.7874	6	60.4527	5.9	55.564	3.43	51.0792	0.5716	FALSE	TRUE	Very Good	Yes	None	None	2081	Zoetis Dog
5088	5088	1579	1579	Parkside Veterinary Centre	2016-03-09	33	147	1029	2	2.81918	4	0	4	2	5	2	3	0	0	4	1	5	0	5	4	5	4	0	0	2	0	0	2.92	32.4087	5.47	35.5686	4.85	30.5807	2.39	36.5086	-0.7076	TRUE	FALSE	Very Good	Yes	None	None	1579	Zoetis Dog
5102	5102	4159	4159	Stanley House Veterinary Surgeons	2016-03-09	40	176.143	1233	3	3.37808	5	0	6	2	6	0	1	6	0	5	0	6	0	6	1	6	5	0	0	4	0	0	3.79	50.3304	5.73	41.9721	5.9	51.7692	3.97	56.9781	0.4233	FALSE	FALSE	Very Good	Yes	None	None	4159	Zoetis Dog
5079	5079	4144	4144	Animal Trust	2016-03-08	21	94.7143	663	1	1.81644	6	2	6	0	6	0	3	6	0	6	0	6	0	6	0	6	6	0	0	6	0	0	3.96	54.1545	6	57.0796	5.79	46.7945	4.26	61.1971	0.4598	FALSE	FALSE	Very Good	Yes	None	None	4144	Zoetis Dog
5085	5085	4148	4148	Mark Nelson Veterinary Surgery - Thornton Heath	2016-03-08	13	56.2857	394	1	1.07945	5	1	6	1	6	0	2	5	0	3	0	6	1	6	0	5	5	0	0	6	1	0	3.89	52.4331	5.8	44.6334	5.59	41.2818	2.97	43.9032	0.2596	FALSE	FALSE	Very Good	Yes	None	None	4148	Zoetis Dog
5052	5052	4127	4127	Animal House Vets	2016-03-05	62	271	1897	5	5.19726	4	4	4	4	4	0	1	6	0	5	0	5	0	5	0	6	5	0	0	5	0	0	3.27	39.5021	5.63	39.1805	5.48	39.0207	3.97	56.9781	-0.1063	TRUE	FALSE	Good	Yes	None	None	4127	Zoetis Dog
5035	5035	4117	4117	St. Anne's Veterinary Group	2016-03-04	14	61.1429	428	1	1.1726	6	0	6	0	6	0	0	6	0	5	0	6	0	6	0	6	6	0	0	6	0	0	4.15	58.4932	6	57.0796	6	59.0854	3.97	56.9781	0.6874	FALSE	FALSE	Very Good	Yes	None	None	4117	Zoetis Dog
5046	5046	4124	4124	Wellpet Veterinary Practice Ltd	2016-03-04	23	102.714	719	1	1.96986	5	5	6	0	5	0	0	5	0	2	2	5	0	0	0	0	3	3	0	5	0	0	2.95	32.969	5.77	43.3573	4.83	30.3379	1.45	22.6868	-0.6662	TRUE	FALSE	Very Good	Yes	None	None	4124	Zoetis Dog
5032	5032	4114	4114	Haven Veterinary Practice	2016-03-03	45	196.857	1378	3	3.77534	5	0	6	0	5	0	0	6	1	2	0	6	0	6	0	4	6	1	0	6	0	0	3.94	53.5365	5.82	45.3842	6	59.0854	2.61	39.2804	0.5676	FALSE	FALSE	Good	Yes	None	None	4114	Zoetis Dog
5012	5012	4103	4103	Cedar Grove Veterinary Clinic	2016-03-02	138	600	4200	11	11.5068	6	3	6	0	5	3	0	5	0	6	2	6	0	6	0	6	6	0	0	6	2	0	4.08	57.9796	6	60.4527	4.66	34.2206	4.09	59.5692	-0.1218	TRUE	TRUE	Very Good	Yes	None	None	4103	Zoetis Dog
4998	4998	4092	4092	Charter Vets Congleton	2016-03-01	64	279.857	1959	5	5.36712	6	0	6	0	6	0	0	6	0	5	0	6	0	6	0	5	6	0	0	6	0	0	4.15	58.4932	6	57.0796	6	59.0854	3.72	53.6039	0.6874	FALSE	FALSE	Very Good	Yes	None	None	4092	Zoetis Dog
4962	4962	3366	3366	Bishops Veterinary Surgery	2016-02-27	53	231.857	1623	4	4.44658	5	0	5	0	6	0	0	6	0	0	0	6	0	6	0	6	6	0	0	5	0	0	3.9	52.6529	6	57.0796	6	59.0854	2.52	38.1619	0.5775	FALSE	FALSE	Very Good	Yes	None	None	3366	Zoetis Dog
4960	4960	3341	3341	Willows Veterinary Centre	2016-02-26	59	260.286	1822	4	4.99178	6	0	6	0	6	2	0	6	6	4	2	6	0	6	0	5	6	0	0	6	0	0	4.15	58.4932	5.39	34.1909	5.45	38.6244	3.43	49.8001	0.2202	FALSE	FALSE	Very Good	Yes	None	None	3341	Zoetis Dog
4941	4941	4054	4054	Bakewell Veterinary Clinic	2016-02-24	78	341.286	2389	6	6.54521	6	4	6	0	6	0	0	6	0	5	0	6	0	6	0	6	6	0	6	6	3	0	4.15	59.0676	5.38	41.9642	5.21	39.9656	3.97	57.9757	0.2547	FALSE	TRUE	Very Good	Yes	None	None	4054	Zoetis Dog
4945	4945	4058	4058	The Pet Vet	2016-02-24	4	17.5714	123	0	0.336986	6	0	6	0	6	0	0	6	0	6	0	6	0	6	0	6	6	0	0	6	0	0	4.15	58.4932	6	57.0796	6	59.0854	4.26	61.1971	0.6874	FALSE	FALSE	Very Good	Yes	None	None	4058	Zoetis Dog
4946	4946	3050	3050	Bredy Veterinary Centre	2016-02-24	22	98.2857	688	1	1.88493	6	0	6	0	6	0	1	0	6	5	0	6	0	6	0	5	6	0	0	5	0	0	4.01	55.2015	5.39	34.1909	5.47	38.9282	2.68	40.2631	0.1705	FALSE	FALSE	Very Good	Yes	None	None	3050	Zoetis Dog
4934	4934	3439	3439	Luxstowe Vets	2016-02-23	13	60.5714	424	1	1.16164	5	0	6	1	5	0	2	5	0	5	0	6	0	6	0	5	5	0	0	5	0	0	3.73	49.0672	5.91	49.6232	5.81	47.77	3.55	51.3141	0.3647	FALSE	FALSE	Very Good	Yes	None	None	3439	Zoetis Dog
4920	4920	4042	4042	Chertsey Vets	2016-02-22	4	21.4286	150	0	0.410959	6	0	6	0	6	0	0	6	0	6	0	6	0	6	0	6	6	0	0	6	0	0	4.15	58.4932	6	57.0796	6	59.0854	4.26	61.1971	0.6874	FALSE	FALSE	Very Good	Yes	None	None	4042	Zoetis Dog
4882	4882	4017	4017	Withy Grove Veterinary Clinic	2016-02-18	9	43.1429	302	0	0.827397	6	0	6	0	6	0	0	6	0	5	0	6	0	6	0	6	6	0	0	6	0	1	4.15	58.4932	5.9	48.9634	6	59.0854	3.97	56.9781	0.6717	FALSE	FALSE	Very Good	Yes	None	None	4017	Zoetis Dog
4884	4884	4019	4019	Withy Grove Veterinary Clinic	2016-02-18	95	413.286	2893	7	7.92603	6	6	6	0	6	0	0	6	6	6	0	6	0	6	0	6	6	0	0	6	0	0	4.15	59.0676	5.39	42.0851	5.36	41.9696	4.26	62.0292	0.345	FALSE	TRUE	Very Good	Yes	None	None	4019	Zoetis Dog
4885	4885	4020	4020	Withy Grove Veterinary Clinic	2016-02-18	29	129.571	907	2	2.48493	6	0	6	0	5	0	0	6	0	4	0	6	0	6	0	4	0	0	0	6	0	0	3.72	48.8066	6	57.0796	5.41	37.8657	3.19	46.6467	0.0964	FALSE	FALSE	Good	Yes	None	None	4020	Zoetis Dog
4887	4887	4022	4022	Orby Vets	2016-02-18	3	16.4286	115	0	0.315068	5	0	6	0	6	0	0	6	0	5	0	6	0	6	0	6	6	0	0	6	0	0	4.07	56.6157	6	57.0796	6	59.0854	3.97	56.9781	0.6528	FALSE	FALSE	Very Good	Yes	None	None	4022	Zoetis Dog
4864	4864	4007	4007	Taylor Veterinary Practice	2016-02-15	5	22.7143	159	0	0.435616	6	0	6	0	6	0	1	6	0	6	0	6	0	6	0	6	6	0	0	6	0	0	4.09	57.0238	6	57.0796	6	59.0854	4.26	61.1971	0.6604	FALSE	FALSE	Very Good	Yes	None	None	4007	Zoetis Dog
4842	4842	1191	1191	Stanley House Veterinary Surgeons	2016-02-13	62	271	1897	5	5.19726	6	0	5	0	6	0	0	0	0	5	0	6	0	6	0	5	6	0	0	6	0	0	4.06	56.2601	6	57.0796	5.47	38.9282	2.68	40.2631	0.2821	FALSE	FALSE	Very Good	Yes	None	None	1191	Zoetis Dog
4828	4828	3994	3994	Charter Vets	2016-02-11	40	176.143	1233	3	3.37808	4	0	4	2	5	0	1	5	0	5	0	5	0	5	0	5	5	0	0	5	0	0	3.34	41.0407	5.81	45.09	5.81	47.77	3.55	51.3141	0.1863	FALSE	FALSE	Good	Yes	None	None	3994	Zoetis Dog
4816	4816	3982	3982	Greenwood & Brown	2016-02-10	15	66.4286	465	1	1.27397	5	0	6	1	6	0	1	6	6	5	0	6	0	6	0	6	6	0	0	6	0	0	4.01	55.1765	5.3	32.6355	6	59.0854	3.97	56.9781	0.5202	FALSE	FALSE	Very Good	Yes	None	None	3982	Zoetis Dog
4805	4805	3975	3975	Stanley House Veterinary Surgeons	2016-02-09	7	31.8571	223	0	0.610959	2	1	1	4	3	0	4	3	1	5	0	3	0	3	1	4	3	0	0	3	1	0	1.92	11.3908	5.44	35.0764	5.21	34.8692	2.96	43.7345	-0.8887	TRUE	FALSE	Very Good	Yes	None	None	3975	Zoetis Dog
4798	4798	3972	3972	Willows Veterinary Centre	2016-02-08	58	252.571	1768	4	4.84384	3	0	2	2	5	0	2	6	0	2	1	5	2	5	1	3	3	1	1	4	1	0	2.75	28.925	5.34	33.2854	5.46	38.7148	2.36	36.0692	-0.3846	TRUE	FALSE	Very Good	Yes	None	None	3972	Zoetis Dog
4762	4762	3951	3951	Charter Vets	2016-02-04	36	157.714	1104	3	3.02466	5	0	4	0	6	0	1	6	0	6	0	5	0	5	0	6	5	0	0	4	0	0	3.42	42.6105	6	57.0796	5.9	51.7692	4.26	61.1971	0.3076	FALSE	FALSE	Very Good	Yes	None	None	3951	Zoetis Dog
4737	4737	3934	3934	Abbey Veterinary Group LTD	2016-02-03	54	236.714	1657	4	4.53973	4	0	5	1	6	0	3	6	0	6	0	6	0	6	0	6	6	1	1	5	0	0	3.56	45.5528	5.73	41.9721	6	59.0854	4.26	61.1971	0.3947	FALSE	FALSE	Good	Yes	None	None	3934	Zoetis Dog
4715	4715	3919	3919	Greenwood & Brown	2016-02-01	8	37.2857	261	0	0.715068	6	0	6	0	6	0	0	6	0	6	0	6	0	6	0	6	6	0	0	6	0	0	4.15	58.4932	6	57.0796	6	59.0854	4.26	61.1971	0.6874	FALSE	FALSE	Very Good	Yes	None	None	3919	Zoetis Dog
4706	4706	3912	3912	Wallace Veterinary Centre	2016-01-31	33	147.571	1033	2	2.83014	6	0	6	0	6	0	0	6	0	6	0	6	0	6	0	6	5	0	0	6	0	0	4.09	57.1005	6	57.0796	5.9	51.7692	4.26	61.1971	0.5943	FALSE	FALSE	Very Good	Yes	None	None	3912	Zoetis Dog
4693	4693	3902	3902	Wildbore Veterinary Ltd	2016-01-29	31	139.143	974	2	2.66849	4	0	5	0	5	0	4	6	6	5	0	5	0	5	0	6	5	0	0	0	0	0	2.85	31.0626	5.39	34.1909	5.9	51.7692	3.97	56.9781	-0.0271	TRUE	FALSE	Very Good	Yes	None	None	3902	Zoetis Dog
4635	4635	3861	3861	Wallace Veterinary Centre	2016-01-23	6	28.5714	200	0	0.547945	3	0	5	0	5	0	0	6	0	3	0	5	0	5	0	6	2	0	0	3	0	0	3.08	35.7475	6	57.0796	5.61	41.7332	3.39	49.2421	-0.0391	TRUE	FALSE	Good	Yes	None	None	3861	Zoetis Dog
4600	4600	3834	3834	Animal Trust	2016-01-21	54	238.857	1672	4	4.58082	6	1	5	1	4	0	1	6	1	4	1	5	0	6	0	4	5	1	0	5	0	1	3.55	45.3444	5.62	39.0718	5.67	43.2389	3.19	46.6467	0.1471	FALSE	FALSE	Good	Yes	None	None	3834	Zoetis Dog
4602	4602	3835	3835	White Lodge Veterinary Centre	2016-01-21	7	31.4286	220	0	0.60274	6	0	6	0	6	0	0	6	0	3	0	6	0	6	0	3	6	0	0	6	0	0	4.15	58.4932	6	57.0796	6	59.0854	2.65	39.8365	0.6874	FALSE	FALSE	Very Good	Yes	None	None	3835	Zoetis Dog
4575	4575	3815	3815	Greenwood & Brown	2016-01-20	20	89.2857	625	1	1.71233	4	0	4	1	5	0	3	5	0	5	0	4	0	5	1	5	5	0	0	4	0	0	3.05	35.0751	5.82	45.3248	5.81	47.77	3.55	51.3141	0.0616	FALSE	FALSE	Good	Yes	None	None	3815	Zoetis Dog
4567	4567	3808	3808	Abbey Veterinary Group LTD	2016-01-19	3	16.8571	118	0	0.323288	5	0	4	0	6	0	2	6	6	6	0	6	0	6	3	6	6	0	0	4	0	0	3.59	46.1563	5.13	30.1658	6	59.0854	4.26	61.1971	0.3171	FALSE	FALSE	Very Good	Yes	None	None	3808	Zoetis Dog
4562	4562	3803	3803	The Mount Vet Practice	2016-01-18	36	157.714	1104	3	3.02466	4	0	6	0	5	0	0	6	0	4	0	6	0	6	0	6	4	0	1	4	0	0	3.64	47.0657	5.9	49.0438	5.8	47.3945	3.68	53.0262	0.316	FALSE	FALSE	Good	Yes	None	None	3803	Zoetis Dog
4556	4556	3797	3797	Rathgael Veterinary Clinic	2016-01-17	8	37.2857	261	0	0.715068	6	0	6	0	6	0	0	6	0	6	0	6	0	6	0	6	6	6	0	6	0	0	3.79	50.2825	5.54	37.0355	6	59.0854	4.26	61.1971	0.4613	FALSE	FALSE	Very Good	Yes	None	None	3797	Zoetis Dog
4544	4544	3789	3789	Charter Vets	2016-01-16	15	68	476	1	1.30411	6	0	6	0	6	0	0	0	6	6	0	6	0	6	0	6	6	0	0	6	0	0	4.15	58.4932	5.39	34.1909	5.47	38.9282	3.22	47.0702	0.2317	FALSE	FALSE	Very Good	Yes	None	None	3789	Zoetis Dog
4539	4539	2179	2179	Hills Veterinary Surgery	2016-01-15	36	158.429	1109	3	3.03836	3	0	3	0	4	0	2	6	6	5	0	4	0	5	0	6	5	1	0	3	0	0	2.72	28.3833	5.31	32.8875	5.9	51.7692	3.97	56.9781	-0.0951	TRUE	FALSE	Very Good	Yes	None	None	2179	Zoetis Dog
4532	4532	3779	3779	Tender Paws vets	2016-01-14	4	20	140	0	0.383562	6	0	6	0	6	0	0	6	0	6	0	6	0	6	0	6	6	0	0	6	0	0	4.15	58.4932	6	57.0796	6	59.0854	4.26	61.1971	0.6874	FALSE	FALSE	Very Good	Yes	None	None	3779	Zoetis Dog
4529	4529	3777	3777	Victoria Vets	2016-01-13	7	32.1429	225	0	0.616438	6	0	6	0	6	0	0	6	0	5	0	6	0	6	0	5	6	0	0	6	0	0	4.15	58.4932	6	57.0796	6	59.0854	3.72	53.6039	0.6874	FALSE	FALSE	Very Good	Yes	None	None	3777	Zoetis Dog
4508	4508	3762	3762	Anrich Vets (Wigan)	2016-01-12	151	656.714	4597	12	12.5945	6	1	5	1	5	1	2	5	1	5	1	5	0	6	1	5	6	1	1	6	1	1	3.71	52.8844	5.43	42.7098	5.41	42.7575	3.55	52.5338	0.1707	FALSE	TRUE	Very Good	Yes	None	None	3762	Zoetis Dog
4503	4503	3755	3755	Bakewell Veterinary Clinic	2016-01-11	17	74	518	1	1.41918	5	0	6	0	6	0	0	6	0	6	0	6	0	6	0	6	6	0	0	6	0	0	4.07	56.6157	6	57.0796	6	59.0854	4.26	61.1971	0.6528	FALSE	FALSE	Very Good	Yes	None	None	3755	Zoetis Dog
4494	4494	3750	3750	Palmer & Duncan Vets Ltd	2016-01-10	5	22.8571	160	0	0.438356	4	1	5	1	5	0	1	5	0	5	0	6	1	6	6	5	6	0	0	6	0	0	3.76	49.6139	5.28	32.3432	5.8	47.4562	3.55	51.3141	0.2754	FALSE	FALSE	Very Good	Yes	None	None	3750	Zoetis Dog
4497	4497	3609	3609	Greenwood & Brown	2016-01-10	8	36	252	0	0.690411	6	0	6	0	6	0	0	6	0	6	0	6	0	6	0	6	6	0	0	6	0	0	4.15	58.4932	6	57.0796	6	59.0854	4.26	61.1971	0.6874	FALSE	FALSE	Good	Yes	None	None	3609	Zoetis Dog
4461	4461	3721	3721	Glenn Veterinary Clinic	2016-01-06	44	194	1358	3	3.72055	6	1	6	0	6	1	1	3	0	3	1	6	0	6	0	5	6	0	0	0	1	0	3.61	46.5287	6	57.0796	5.24	35.1699	2.62	39.4945	-0.0698	TRUE	FALSE	Very Good	Yes	None	None	3721	Zoetis Dog
4442	4442	3697	3697	Bishops Veterinary Surgery	2016-01-05	47	208	1456	3	3.98904	6	0	6	0	6	0	0	6	0	6	0	6	0	6	0	6	6	0	0	6	0	0	4.15	58.4932	6	57.0796	6	59.0854	4.26	61.1971	0.6874	FALSE	FALSE	Very Good	Yes	None	None	3697	Zoetis Dog
4446	4446	3701	3701	Wallace Veterinary Centre	2016-01-05	68	297.429	2082	5	5.70411	5	0	5	1	6	0	1	6	0	6	1	6	0	5	0	6	4	0	0	4	0	0	3.55	45.1825	5.91	49.6232	5.68	43.4575	4.26	61.1971	0.1921	FALSE	FALSE	Very Good	Yes	None	None	3701	Zoetis Dog
4448	4448	3703	3703	Winton Lodge Veterinary Clinic	2016-01-05	4	18	126	0	0.345205	5	0	4	1	5	0	3	6	0	5	0	5	0	5	0	5	4	0	0	4	0	0	3.16	37.2734	5.91	49.6232	5.8	47.3945	3.72	53.6039	0.1143	FALSE	FALSE	Very Good	Yes	None	None	3703	Zoetis Dog
4430	4430	3686	3686	Midsummer Veterinary Centre	2016-01-04	4	19.1429	134	0	0.367123	6	0	6	3	6	0	4	6	0	5	0	6	0	6	0	6	6	0	0	6	0	1	3.9	52.7507	5.62	38.8926	6	59.0854	3.97	56.9781	0.5217	FALSE	FALSE	Very Good	Yes	None	None	3686	Zoetis Dog
4424	4424	3679	3679	Taylor Veterinary Practice	2016-01-03	36	157.714	1104	3	3.02466	6	0	6	6	6	0	0	6	0	6	0	6	0	6	0	6	6	0	0	6	0	0	4.15	58.4932	5.44	35.1302	6	59.0854	4.26	61.1971	0.6035	FALSE	FALSE	Very Good	Yes	None	None	3679	Zoetis Dog
4406	4406	3118	3118	Wildbore Veterinary Ltd	2015-12-31	147	639.286	4475	12	12.2603	6	0	6	2	6	0	0	6	0	3	0	6	0	6	0	6	4	0	6	6	0	0	4.03	57.3495	5.2	39.6072	5.8	51.5262	3.39	50.5431	0.5627	FALSE	TRUE	Very Good	Yes	None	None	3118	Zoetis Dog
4399	4399	3665	3665	Milton Keynes Vet Group	2015-12-29	79	345	2415	6	6.61644	5	0	5	0	5	0	0	5	0	5	0	5	0	5	0	5	5	0	0	5	0	0	3.59	51.3119	6	60.4527	5.81	51.8728	3.55	52.5338	0.3628	FALSE	TRUE	Very Good	Yes	None	None	3665	Zoetis Dog
4388	4388	3657	3657	Tweed House Veterinary Surgery	2015-12-28	110	480.857	3366	9	9.22192	6	6	6	1	6	0	2	6	0	5	0	5	0	5	1	3	5	0	0	5	0	0	3.71	52.9725	5.82	51.0198	5.26	40.5927	3.23	48.5785	0.0814	FALSE	TRUE	Very Good	Yes	None	None	3657	Zoetis Dog
4366	4366	3649	3649	Abbey Veterinary Group Ltd	2015-12-25	45	199.286	1395	3	3.82192	5	0	5	0	5	0	0	6	0	6	0	5	0	5	0	5	5	1	1	5	0	1	3.52	44.7438	5.72	41.6153	5.9	51.7692	4.01	57.5887	0.3089	FALSE	FALSE	Very Good	Yes	None	None	3649	Zoetis Dog
4355	4355	2624	2624	Brookend Veterinary Practice	2015-12-22	8	36.5714	256	0	0.70137	3	3	3	3	3	3	3	3	3	3	3	3	3	3	3	3	3	3	3	3	3	3	2.08	14.8681	3.99	18.8166	3.94	22.7174	2.13	32.9745	-1.9159	TRUE	FALSE	Good	Yes	None	None	2624	Zoetis Dog
4343	4343	3630	3630	Wallace Veterinary Centre	2015-12-21	84	366.571	2566	7	7.03014	6	0	5	0	6	0	0	6	0	6	0	6	0	5	0	6	5	0	0	5	0	0	3.83	54.5464	6	60.4527	5.9	55.564	4.26	62.0292	0.5297	FALSE	TRUE	Very Good	Yes	None	None	3630	Zoetis Dog
4321	4321	3614	3614	Foxgrove Veterinary Centre	2015-12-19	7	32.7143	229	0	0.627397	6	0	6	0	6	0	0	6	0	4	0	6	0	6	0	5	6	0	0	6	0	0	4.15	58.4932	6	57.0796	6	59.0854	3.43	49.8001	0.6874	FALSE	FALSE	Very Good	Yes	None	None	3614	Zoetis Dog
4322	4322	3615	3615	Batchelor, Davidson and Watson Ltd	2015-12-19	11	49.8571	349	0	0.956164	5	0	6	0	5	0	0	5	5	5	0	6	5	6	1	6	4	0	0	6	0	0	3.88	52.2381	4.88	27.127	5.72	44.5171	3.8	54.5909	0.2056	FALSE	FALSE	Very Good	Yes	None	None	3615	Zoetis Dog
4327	4327	3619	3619	Wallace Veterinary Centre	2015-12-19	9	41.8571	293	0	0.80274	6	0	6	0	6	0	0	6	0	5	0	6	0	6	0	6	6	0	0	6	0	0	4.15	58.4932	6	57.0796	6	59.0854	3.97	56.9781	0.6874	FALSE	FALSE	Very Good	Yes	None	None	3619	Zoetis Dog
4317	4317	3007	3007	Wildbore Veterinary Ltd	2015-12-18	30	132.143	925	2	2.53425	5	0	6	0	6	0	1	6	0	6	0	6	3	6	0	6	4	0	0	5	0	0	3.81	50.7624	5.69	40.7651	5.8	47.3945	4.26	61.1971	0.3583	FALSE	FALSE	Very Good	Yes	None	None	3007	Zoetis Dog
4320	4320	3611	3611	Mark Nelson Veterinary Surgery (Westerham)	2015-12-18	18	79.4286	556	1	1.52329	6	0	5	0	6	0	1	6	0	3	0	6	0	6	6	6	6	0	0	6	0	3	3.99	54.8263	5.16	30.6375	6	59.0854	3.39	49.2421	0.4933	FALSE	FALSE	Very Good	Yes	None	None	3611	Zoetis Dog
4310	4310	3605	3605	Myerscough Veterinary Group	2015-12-17	14	64.2857	450	1	1.23288	6	0	6	0	6	0	0	6	0	6	0	6	0	6	0	6	6	0	0	6	0	0	4.15	58.4932	6	57.0796	6	59.0854	4.26	61.1971	0.6874	FALSE	FALSE	Very Good	Yes	None	None	3605	Zoetis Dog
4312	4312	3607	3607	Downs Link Veterinary Surgery	2015-12-17	19	83.5714	585	1	1.60274	6	0	5	0	5	0	0	6	0	6	0	6	0	6	0	6	5	0	0	6	0	0	3.92	53.2165	6	57.0796	5.9	51.7692	4.26	61.1971	0.5208	FALSE	FALSE	Very Good	Yes	None	None	3607	Zoetis Dog
4297	4297	3079	3079	Pennine Vets	2015-12-16	7	30.8571	216	0	0.591781	6	6	6	0	6	0	0	6	0	6	0	6	0	6	6	6	6	0	0	6	0	0	4.15	58.4932	5.48	35.7931	5.36	37.0405	4.26	61.1971	0.169	FALSE	FALSE	Very Good	Yes	None	None	3079	Zoetis Dog
4298	4298	2391	2391	Parkside Veterinary Centre	2015-12-16	10	45.7143	320	0	0.876712	5	1	5	1	5	0	1	5	1	0	0	5	0	6	0	5	5	1	1	5	1	1	3.55	45.2288	5.52	36.6991	5.59	41.2818	2.1	32.5614	0.0732	FALSE	FALSE	Good	Yes	None	None	2391	Zoetis Dog
4302	4302	3070	3070	Grahams Road Vet Clinic	2015-12-16	5	23.7143	166	0	0.454795	6	0	6	0	6	6	0	6	0	6	0	6	0	6	0	6	6	0	0	6	0	0	4.15	58.4932	6	57.0796	5.12	33.6398	4.26	61.1971	0.0829	FALSE	FALSE	Good	Yes	None	None	3070	Zoetis Dog
4285	4285	3584	3584	Hills Veterinary Surgery	2015-12-15	6	27.5714	193	0	0.528767	5	0	6	0	5	0	2	6	0	6	0	6	0	6	0	6	6	0	0	6	0	0	3.87	52.0921	6	57.0796	6	59.0854	4.26	61.1971	0.5666	FALSE	FALSE	Very Good	Yes	None	None	3584	Zoetis Dog
4275	4275	3574	3574	Milton Keynes Vet Group	2015-12-14	43	187.429	1312	3	3.59452	3	0	4	1	5	0	0	6	0	6	0	6	0	5	0	0	0	0	0	3	0	0	2.95	33.1483	5.91	49.6232	5.41	37.8657	2.78	41.4952	-0.2431	TRUE	FALSE	Very Good	Yes	None	None	3574	Zoetis Dog
4277	4277	3575	3575	Kingdom Veterinary Clinic	2015-12-14	4	18.7143	131	0	0.358904	6	0	6	0	6	0	0	6	6	6	0	6	0	6	0	6	6	0	0	6	0	0	4.15	58.4932	5.39	34.1909	6	59.0854	4.26	61.1971	0.5957	FALSE	FALSE	Very Good	Yes	None	None	3575	Zoetis Dog
4280	4280	3579	3579	St. Anne's Veterinary Group	2015-12-14	47	205	1435	3	3.93151	6	0	6	0	5	0	1	4	0	5	0	6	0	6	0	5	6	0	0	6	0	1	4.01	55.3018	5.9	48.9634	5.82	48.1582	3.38	49.0709	0.4911	FALSE	FALSE	Good	Yes	None	None	3579	Zoetis Dog
4204	4204	3522	3522	Brookend Veterinary Practice	2015-12-05	6	26.1429	183	0	0.50137	6	0	6	0	5	0	0	6	0	2	0	6	0	6	0	3	5	0	0	6	0	0	4.02	55.3771	6	57.0796	5.9	51.7692	2.36	36.0692	0.562	FALSE	FALSE	Very Good	Yes	None	None	3522	Zoetis Dog
[truncated: 313 more rows]
[truncated: 40 more columns]

## Sheet: master pivot
	Column Labels
	F		F Total	M		M Total	Grand Total
	FALSE	TRUE		FALSE	TRUE
Count of PetId	1408	190	1598	1626	187	1813	3411

## Sheet:  practice dups removed
QuestionnaireID	Match Questionnaire ID	PetId	Match PetId between our data and Zoetis data	DEMO or Practice	Date Completed	Age (months)	Age (weeks)	Age (days)	Age (years)	Age years by days/365	Active	Uncomfortable	Playful	Lethargic	Happy	Limping	Tired	Comfortable	Unhappy	Calm	Stiff	Bright	Groaning	Fun-loving	Listless	Relaxed	Athletic	Sad	Depressed	Energetic	Sore	Confused	Energetic/Enthusiastic	NormalisedScore	Happy/Content	NormalisedScore	Active/Comfortable	NormalisedScore	Calm/Relaxed	NormalisedScore	ContactVetScore	ContactVetFlag	IsOldPet	Quality of Life	In Perfect Health	Affecting Quality of Life	Health Status Changed	PetId	Pet Name
[truncated: 211 more rows]
[truncated: 40 more columns]

[truncated: 6 more sheets: pivot dogs not kc groups, dogs not in kc group, pivot non KC 6mths plus, non KC and 6mths plus, 16 dogs negative CR, 3 dogs negative EE]
